# Supplementary material for: Small Theropod Teeth from the Late Cretaceous of the San Juan Basin, Northwestern New Mexico and Their Implications for Understanding Latest Cretaceous Dinosaur Evolution
Source: PLoS One. 2014 Apr 7;9(4):e93190. doi: 10.1371/journal.pone.0093190 (PMC3977837; doi:10.1371/journal.pone.0093190)
Supplement: Appendix S2 — Principal Component (PCA) and Discriminate Function Analyses (DFA) of small theropod teeth. (XLSX) [file pone.0093190.s002.xlsx]

## Sheet: Original Data
Specimen number	Tooth Category	ID (this study)	FABL	CH	BW	ADM	PDM	Source
Milk River Formation (~83.5 Ma)
UALVP47980	Milk River Saurornitholestinae	Milk River Saurornitholestinae gen. et sp.	4.15	5.06	1.64	7	4.75	Larson 2008
UALVP47981	Milk River Saurornitholestinae	Milk River Saurornitholestinae gen. et sp.	4.23	5.98	1.72	13	6	Larson 2008
UALVP47983	Milk River Saurornitholestinae	Milk River Saurornitholestinae gen. et sp.	4.57	6.56	1.83	10	5	Larson 2008
UALVP47987	Milk River Saurornitholestinae	Milk River Saurornitholestinae gen. et sp.	2.08	2.32	1	9	6	Larson 2008
UALVP48029	Milk River Saurornitholestinae	Milk River Saurornitholestinae gen. et sp.	3.74	5.89	1.72	8	5	Larson 2008
UALVP48030	Milk River Saurornitholestinae	Milk River Saurornitholestinae gen. et sp.	4.15	6.39	1.76	7	4	Larson 2008
UALVP48031	Milk River Saurornitholestinae	Milk River Saurornitholestinae gen. et sp.	1.84	2.2	0.84	11	6	Larson 2008
UALVP48037	Milk River Saurornitholestinae	Milk River Saurornitholestinae gen. et sp.	3.49	5.48	1.76	9.5	6	Larson 2008
UALVP48044	Milk River Saurornitholestinae	Milk River Saurornitholestinae gen. et sp.	2.49	4.81	1.28	9	5	Larson 2008
UALVP48046	Milk River Saurornitholestinae	Milk River Saurornitholestinae gen. et sp.	3.15	5.4	1.44	7	5.75	Larson 2008
UALVP48047	Milk River Saurornitholestinae	Milk River Saurornitholestinae gen. et sp.	2.64	3.4	1.16	8	5	Larson 2008
UALVP48053	Milk River Saurornitholestinae	Milk River Saurornitholestinae gen. et sp.	3.4	4.98	1.48	8	5	Larson 2008
UALVP48054	Milk River Saurornitholestinae	Milk River Saurornitholestinae gen. et sp.	2.74	4.4	1.1	8.2	6.3	Larson 2008
UALVP48059	Milk River Saurornitholestinae	Milk River Saurornitholestinae gen. et sp.	2.4	3.4	1.26	8.5	5.25	Larson 2008
UALVP48061	Milk River Saurornitholestinae	Milk River Saurornitholestinae gen. et sp.	4.32	6.47	1.66	6.3	4.5	Larson 2008
UALVP48063	Milk River Saurornitholestinae	Milk River Saurornitholestinae gen. et sp.	3.15	3.98	1.3	9.5	5.5	Larson 2008
UALVP48064	Milk River Saurornitholestinae	Milk River Saurornitholestinae gen. et sp.	4.07	7.22	1.62	6.5	5	Larson 2008
UALVP48065	Milk River Saurornitholestinae	Milk River Saurornitholestinae gen. et sp.	3.57	4.48	1.52	8	5	Larson 2008
UALVP48066	Milk River Saurornitholestinae	Milk River Saurornitholestinae gen. et sp.	4.4	6.89	1.68	11	5.5	Larson 2008
UALVP48067	Milk River Saurornitholestinae	Milk River Saurornitholestinae gen. et sp.	3.9	5.48	1.76	10	5	Larson 2008
UALVP48068	Milk River Saurornitholestinae	Milk River Saurornitholestinae gen. et sp.	4.23	4.48	1.88	8	4.3	Larson 2008
UALVP48070	Milk River Saurornitholestinae	Milk River Saurornitholestinae gen. et sp.	2.72	3.72	1.1	8.6	5.25	Larson 2008
UALVP48073	Milk River Saurornitholestinae	Milk River Saurornitholestinae gen. et sp.	2.74	5.06	1.12	10	6.5	Larson 2008
UALVP48074	Milk River Saurornitholestinae	Milk River Saurornitholestinae gen. et sp.	2.91	4.9	1.12	8	5.75	Larson 2008
UALVP48075	Milk River Saurornitholestinae	Milk River Saurornitholestinae gen. et sp.	3.08	3.24	1.24	7.6	4.6	Larson 2008
UALVP48076	Milk River Saurornitholestinae	Milk River Saurornitholestinae gen. et sp.	2.44	3.6	1.12	9	6.5	Larson 2008
UALVP48077	Milk River Saurornitholestinae	Milk River Saurornitholestinae gen. et sp.	3.12	3.76	1.18	9	6	Larson 2008
UALVP48078	Milk River Saurornitholestinae	Milk River Saurornitholestinae gen. et sp.	2.8	3.12	1.32	10	5.5	Larson 2008
UALVP48080	Milk River Saurornitholestinae	Milk River Saurornitholestinae gen. et sp.	2.4	2.68	1.18	0	5.7	Larson 2008
UALVP48082	Milk River Saurornitholestinae	Milk River Saurornitholestinae gen. et sp.	3.07	5.15	1.56	10	5.25	Larson 2008
UALVP48095	Milk River Saurornitholestinae	Milk River Saurornitholestinae gen. et sp.	2.84	3.32	1.42	6.6	5	Larson 2008
UALVP48118	Milk River Saurornitholestinae	Milk River Saurornitholestinae gen. et sp.	4.81	7.47	1.82	7	5	Larson 2008
UALVP48126	Milk River Saurornitholestinae	Milk River Saurornitholestinae gen. et sp.	3.57	6.06	1.86		5.5	Larson 2008
UALVP48127	Milk River Saurornitholestinae	Milk River Saurornitholestinae gen. et sp.	3.9	5.81	1.68		4.75	Larson 2008
UALVP48128	Milk River Saurornitholestinae	Milk River Saurornitholestinae gen. et sp.	3.24	4.15	1.24	9	5	Larson 2008
UALVP48129	Milk River Saurornitholestinae	Milk River Saurornitholestinae gen. et sp.	2.4	3.4	1.02	8.5	5.6	Larson 2008
UALVP48135	Milk River Saurornitholestinae	Milk River Saurornitholestinae gen. et sp.	1.76	2	0.84	11	6	Larson 2008
UALVP48137	Milk River Saurornitholestinae	Milk River Saurornitholestinae gen. et sp.	2.36	3.16	1.06		7	Larson 2008
UALVP48221	Milk River Saurornitholestinae	Milk River Saurornitholestinae gen. et sp.	2.08	2.52	0.88	10	8	Larson 2008
UALVP48223	Milk River Saurornitholestinae	Milk River Saurornitholestinae gen. et sp.	2	2.72	0.86	8	8	Larson 2008
UALVP48249	Milk River Saurornitholestinae	Milk River Saurornitholestinae gen. et sp.	1.64	2.28	0.8	10	8	Larson 2008
UALVP48466	Milk River Saurornitholestinae	Milk River Saurornitholestinae gen. et sp.	3.98	6.64	2.12	5.2	4.3	Larson 2008
UALVP48478	Milk River Saurornitholestinae	Milk River Saurornitholestinae gen. et sp.	2.28	2.64	1.16	6.8	4.5	Larson 2008
UALVP50475	Milk River Saurornitholestinae	Milk River Saurornitholestinae gen. et sp.	2.36	2.52	1.1	8	5.7	Larson 2008
UALVP50476	Milk River Saurornitholestinae	Milk River Saurornitholestinae gen. et sp.	2.66	4.15	1.12	8.2	6.2	Larson 2008
UALVP50477	Milk River Saurornitholestinae	Milk River Saurornitholestinae gen. et sp.	2.16	3.57	1.14		6.2	Larson 2008
UALVP50478	Milk River Saurornitholestinae	Milk River Saurornitholestinae gen. et sp.	2.91	3.82	1.32		5.6	Larson 2008
UALVP50479	Milk River Saurornitholestinae	Milk River Saurornitholestinae gen. et sp.	2.57	3.82	1.2	9	7.2	Larson 2008
UALVP50480	Milk River Saurornitholestinae	Milk River Saurornitholestinae gen. et sp.	2.16	4.23	1.02		6.6	Larson 2008
UALVP50481	Milk River Saurornitholestinae	Milk River Saurornitholestinae gen. et sp.	3.74	5.56	1.52	8.2	5.5	Larson 2008
UALVP50482	Milk River Saurornitholestinae	Milk River Saurornitholestinae gen. et sp.	3.07	5.06	1.44	9	6	Larson 2008
UALVP50483	Milk River Saurornitholestinae	Milk River Saurornitholestinae gen. et sp.	4.15	7.3	1.76	6.5	4.8	Larson 2008
UALVP50484	Milk River Saurornitholestinae	Milk River Saurornitholestinae gen. et sp.	2.83	3.4	1.12	9	6.2	Larson 2008
UALVP50485	Milk River Saurornitholestinae	Milk River Saurornitholestinae gen. et sp.	3.11	4.48	1.32	6.6	5.1	Larson 2008
UALVP50486	Milk River Saurornitholestinae	Milk River Saurornitholestinae gen. et sp.	2.91	3.9	1.36	7	5	Larson 2008
UALVP50487	Milk River Saurornitholestinae	Milk River Saurornitholestinae gen. et sp.	2.24	2.49	0.96	10	6.5	Larson 2008
UALVP50488	Milk River Saurornitholestinae	Milk River Saurornitholestinae gen. et sp.	2.57	4.07	1.3	8.8	5.9	Larson 2008
UALVP50489	Milk River Saurornitholestinae	Milk River Saurornitholestinae gen. et sp.	3.07	4.73	1.42	8.8	5.2	Larson 2008
UALVP50490	Milk River Saurornitholestinae	Milk River Saurornitholestinae gen. et sp.	4.32	5.81	1.9	6.5	4.4	Larson 2008
UALVP50491	Milk River Saurornitholestinae	Milk River Saurornitholestinae gen. et sp.	3.24	5.06	1.28	10.3	5.4	Larson 2008
UALVP50492	Milk River Saurornitholestinae	Milk River Saurornitholestinae gen. et sp.	3.4	4.9	1.58	8	5.3	Larson 2008
UALVP50493	Milk River Saurornitholestinae	Milk River Saurornitholestinae gen. et sp.	2.49	4.77	1.26		6	Larson 2008
UALVP50494	Milk River Saurornitholestinae	Milk River Saurornitholestinae gen. et sp.	2.91	5.23	1.46	11.5	5.9	Larson 2008
UALVP50495	Milk River Saurornitholestinae	Milk River Saurornitholestinae gen. et sp.	2.74	4.57	1.26	10.6	5.3	Larson 2008
UALVP50496	Milk River Saurornitholestinae	Milk River Saurornitholestinae gen. et sp.	4.32	6.47	1.44	8.1	5.4	Larson 2008
UALVP50497	Milk River Saurornitholestinae	Milk River Saurornitholestinae gen. et sp.	3.74	5.23	1.76	8	5.4	Larson 2008
UALVP50498	Milk River Saurornitholestinae	Milk River Saurornitholestinae gen. et sp.	2.91	3.4	1.24	8.5	5.1	Larson 2008
UALVP50499	Milk River Saurornitholestinae	Milk River Saurornitholestinae gen. et sp.	4.15	6.31	1.8	7.4	4.9	Larson 2008
UALVP50500	Milk River Saurornitholestinae	Milk River Saurornitholestinae gen. et sp.	3.57	6.23	1.6	10.6	4.7	Larson 2008
UALVP50501	Milk River Saurornitholestinae	Milk River Saurornitholestinae gen. et sp.	2.32	3.49	1.16	9	6	Larson 2008
UALVP50502	Milk River Saurornitholestinae	Milk River Saurornitholestinae gen. et sp.	2.36	2.76	0.94	9.7	5.8	Larson 2008
UALVP50503	Milk River Saurornitholestinae	Milk River Saurornitholestinae gen. et sp.	3.9	7.22	1.6		5.2	Larson 2008
UALVP50504	Milk River Saurornitholestinae	Milk River Saurornitholestinae gen. et sp.	3.4	4.98	1.4	9.2	5.9	Larson 2008
UALVP50505	Milk River Saurornitholestinae	Milk River Saurornitholestinae gen. et sp.	4.57	6.64	1.92	8	4.5	Larson 2008
UALVP50506	Milk River Saurornitholestinae	Milk River Saurornitholestinae gen. et sp.	4.23	7.55	1.64	7.7	5.5	Larson 2008
UALVP50507	Milk River Saurornitholestinae	Milk River Saurornitholestinae gen. et sp.	4.4	6.14	1.92	6.3	5	Larson 2008
UALVP50508	Milk River Saurornitholestinae	Milk River Saurornitholestinae gen. et sp.	2.28	2.76	1.08	7	4.8	Larson 2008
UALVP50509	Milk River Saurornitholestinae	Milk River Saurornitholestinae gen. et sp.	2.57	4.65	1.48		6.3	Larson 2008
UALVP50510	Milk River Saurornitholestinae	Milk River Saurornitholestinae gen. et sp.	2.16	3.57	1.26		5.7	Larson 2008
UALVP50511	Milk River Saurornitholestinae	Milk River Saurornitholestinae gen. et sp.	2.49	5.06	1.28	7.14	5.2	Larson 2008
UALVP50512	Milk River Saurornitholestinae	Milk River Saurornitholestinae gen. et sp.	2.16	3.86	1.26		5.5	Larson 2008
UALVP50513	Milk River Saurornitholestinae	Milk River Saurornitholestinae gen. et sp.	2.82	3.61	1.24	8.2	6.3	Larson 2008
UALVP50514	Milk River Saurornitholestinae	Milk River Saurornitholestinae gen. et sp.	2.91	4.07	1.26	11	5.5	Larson 2008
UALVP50515	Milk River Saurornitholestinae	Milk River Saurornitholestinae gen. et sp.	3.49	5.19	1.46	8.2	5.2	Larson 2008
UALVP50516	Milk River Saurornitholestinae	Milk River Saurornitholestinae gen. et sp.	2.4	2.88	0.9	8	7.8	Larson 2008
UALVP50517	Milk River Saurornitholestinae	Milk River Saurornitholestinae gen. et sp.	2.52	2.88	1		6.6	Larson 2008
UALVP50518	Milk River Saurornitholestinae	Milk River Saurornitholestinae gen. et sp.	2.6	2.94	1.04	8.5	6.2	Larson 2008
UALVP50519	Milk River Saurornitholestinae	Milk River Saurornitholestinae gen. et sp.	1.96	2.48	0.8	11.6	5.7	Larson 2008
UALVP50520	Milk River Saurornitholestinae	Milk River Saurornitholestinae gen. et sp.	3.57	5.48	1.38	8.8	5.5	Larson 2008
UALVP50521	Milk River Saurornitholestinae	Milk River Saurornitholestinae gen. et sp.	3.07	4.23	1.24	7.9	5.4	Larson 2008
UALVP50522	Milk River Saurornitholestinae	Milk River Saurornitholestinae gen. et sp.	3.98	5.23	1.62	9	4.7	Larson 2008
UALVP50523	Milk River Saurornitholestinae	Milk River Saurornitholestinae gen. et sp.	4.48	7.06	1.7	8.2	5.2	Larson 2008
UALVP50524	Milk River Saurornitholestinae	Milk River Saurornitholestinae gen. et sp.	3.9	6.39	1.8	7.7	4.8	Larson 2008
UALVP50525	Milk River Saurornitholestinae	Milk River Saurornitholestinae gen. et sp.	3.07	5.31	1.52		5.1	Larson 2008
UALVP50526	Milk River Saurornitholestinae	Milk River Saurornitholestinae gen. et sp.	2.74	4.07	1.1	11	6.1	Larson 2008
UALVP50527	Milk River Saurornitholestinae	Milk River Saurornitholestinae gen. et sp.	2.32	3.82	0.94	10	6.7	Larson 2008
UALVP50528	Milk River Saurornitholestinae	Milk River Saurornitholestinae gen. et sp.	3.49	5.98	1.74		5.6	Larson 2008
UALVP50529	Milk River Saurornitholestinae	Milk River Saurornitholestinae gen. et sp.	4.19	6.81	1.82	7	4.5	Larson 2008
UALVP50530	Milk River Saurornitholestinae	Milk River Saurornitholestinae gen. et sp.	3.9	6.14	1.62	8.1	5.3	Larson 2008
UALVP50531	Milk River Saurornitholestinae	Milk River Saurornitholestinae gen. et sp.	4.15	8.38	1.8	6.8	5.1	Larson 2008
UALVP50532	Milk River Saurornitholestinae	Milk River Saurornitholestinae gen. et sp.	4.57	6.31	1.76	6.7	4.5	Larson 2008
UALVP50533	Milk River Saurornitholestinae	Milk River Saurornitholestinae gen. et sp.	3.98	6.72	1.66		4.9	Larson 2008
UALVP50534	Milk River Saurornitholestinae	Milk River Saurornitholestinae gen. et sp.	3.98	6.72	1.66	7.6	5	Larson 2008
UALVP50535	Milk River Saurornitholestinae	Milk River Saurornitholestinae gen. et sp.	4.07	6.14	1.7	6.5	5	Larson 2008
UALVP50536	Milk River Saurornitholestinae	Milk River Saurornitholestinae gen. et sp.	3.65	5.56	1.52	7.7	5	Larson 2008
UALVP50537	Milk River Saurornitholestinae	Milk River Saurornitholestinae gen. et sp.	2.49	2.66	1.36		5.8	Larson 2008
UALVP50538	Milk River Saurornitholestinae	Milk River Saurornitholestinae gen. et sp.	3.74	6.56	1.32		5.5	Larson 2008
UALVP50539	Milk River Saurornitholestinae	Milk River Saurornitholestinae gen. et sp.	3.32	5.64	1.38		5.7	Larson 2008
UALVP50540	Milk River Saurornitholestinae	Milk River Saurornitholestinae gen. et sp.	2.91	5.48	1.26		5.5	Larson 2008
UALVP50541	Milk River Saurornitholestinae	Milk River Saurornitholestinae gen. et sp.	3.82	5.06	1.74	7.2	4.3	Larson 2008
UALVP50542	Milk River Saurornitholestinae	Milk River Saurornitholestinae gen. et sp.	2.57	3.28	1.08	8.8	6.1	Larson 2008
UALVP50543	Milk River Saurornitholestinae	Milk River Saurornitholestinae gen. et sp.	2.16	3.24	0.98	9.7	5.4	Larson 2008
UALVP50544	Milk River Saurornitholestinae	Milk River Saurornitholestinae gen. et sp.	2.82	3.32	1.3	8	5.5	Larson 2008
UALVP50545	Milk River Saurornitholestinae	Milk River Saurornitholestinae gen. et sp.	2.41	3.61	0.98	9.3	6.1	Larson 2008
UALVP50546	Milk River Saurornitholestinae	Milk River Saurornitholestinae gen. et sp.	1.91	3.65	1.02		8	Larson 2008
UALVP50547	Milk River Saurornitholestinae	Milk River Saurornitholestinae gen. et sp.	2.41	2.49	1.16	8.2	5.9	Larson 2008
UALVP50548	Milk River Saurornitholestinae	Milk River Saurornitholestinae gen. et sp.	2.45	2.66	1.16		7.5	Larson 2008
UALVP50549	Milk River Saurornitholestinae	Milk River Saurornitholestinae gen. et sp.	4.07	5.31	1.6		4.7	Larson 2008
UALVP50550	Milk River Saurornitholestinae	Milk River Saurornitholestinae gen. et sp.	3.98	6.56	1.82	7.25	4.75	Larson 2008
UALVP50551	Milk River Saurornitholestinae	Milk River Saurornitholestinae gen. et sp.	3.15	4.07	1.16	9	5.5	Larson 2008
UALVP50552	Milk River Saurornitholestinae	Milk River Saurornitholestinae gen. et sp.	2.32	3.24	1.04	9.5	6.15	Larson 2008
UALVP50553	Milk River Saurornitholestinae	Milk River Saurornitholestinae gen. et sp.	2.57	3.82	1.06	9.2	6.75	Larson 2008
UALVP50554	Milk River Saurornitholestinae	Milk River Saurornitholestinae gen. et sp.	3.15	4.15	1.4	8.75	5.75	Larson 2008
UALVP50555	Milk River Saurornitholestinae	Milk River Saurornitholestinae gen. et sp.	2.49	4.15	1.06	9	6	Larson 2008
UALVP50556	Milk River Saurornitholestinae	Milk River Saurornitholestinae gen. et sp.	4.9	7.3	1.64	9	5.5	Larson 2008
UALVP50557	Milk River Saurornitholestinae	Milk River Saurornitholestinae gen. et sp.	2.74	3.74	1.06	11.5	6.2	Larson 2008
UALVP50558	Milk River Saurornitholestinae	Milk River Saurornitholestinae gen. et sp.	3.57	5.81	1.46		5.5	Larson 2008
UALVP50559	Milk River Saurornitholestinae	Milk River Saurornitholestinae gen. et sp.	3.9	6.23	1.76	10	4.76	Larson 2008
UALVP50560	Milk River Saurornitholestinae	Milk River Saurornitholestinae gen. et sp.	3.65	6.23	1.52	8.5	5.5	Larson 2008
UALVP50561	Milk River Saurornitholestinae	Milk River Saurornitholestinae gen. et sp.	3.57	5.23	1.66		5.3	Larson 2008
UALVP50562	Milk River Saurornitholestinae	Milk River Saurornitholestinae gen. et sp.	3.65	4.57	1.64	9.5	5.1	Larson 2008
UALVP50563	Milk River Saurornitholestinae	Milk River Saurornitholestinae gen. et sp.	3.07	5.48	1.52		5.6	Larson 2008
UALVP50564	Milk River Saurornitholestinae	Milk River Saurornitholestinae gen. et sp.	3.57	4.81	1.38	7.5	4.3	Larson 2008
UALVP50565	Milk River Saurornitholestinae	Milk River Saurornitholestinae gen. et sp.	4.15	5.64	1.74	8	5	Larson 2008
UALVP50566	Milk River Saurornitholestinae	Milk River Saurornitholestinae gen. et sp.	3.4	5.48	1.64		5.2	Larson 2008
UALVP50567	Milk River Saurornitholestinae	Milk River Saurornitholestinae gen. et sp.	3.98	5.48	1.68	7.7	5.3	Larson 2008
UALVP50568	Milk River Saurornitholestinae	Milk River Saurornitholestinae gen. et sp.	3.98	6.89	1.88	10	5.6	Larson 2008
UALVP50569	Milk River Saurornitholestinae	Milk River Saurornitholestinae gen. et sp.	3.57	6.47	1.52		4.8	Larson 2008
UALVP50570	Milk River Saurornitholestinae	Milk River Saurornitholestinae gen. et sp.	3.07	3.4	1.36	9	5	Larson 2008
UALVP50571	Milk River Saurornitholestinae	Milk River Saurornitholestinae gen. et sp.	3.3	5.2	1.2	11	5.5	Larson 2008
UALVP50572	Milk River Saurornitholestinae	Milk River Saurornitholestinae gen. et sp.	2.8	4.7	1.1	8.5	6	Larson 2008
UALVP50573	Milk River Saurornitholestinae	Milk River Saurornitholestinae gen. et sp.	3.7	4.5	1.5	7.5	5	Larson 2008
UALVP50574	Milk River Saurornitholestinae	Milk River Saurornitholestinae gen. et sp.	3.5	4.1	1.6	8	5	Larson 2008
UALVP50575	Milk River Saurornitholestinae	Milk River Saurornitholestinae gen. et sp.	3.3	4.3	1.4	6.5	4.5	Larson 2008
UALVP50576	Milk River Saurornitholestinae	Milk River Saurornitholestinae gen. et sp.	2	2.1	1.1		7	Larson 2008
UALVP50577	Milk River Saurornitholestinae	Milk River Saurornitholestinae gen. et sp.	2.2	2.84	1.02	8	7	Larson 2008
UALVP50578	Milk River Saurornitholestinae	Milk River Saurornitholestinae gen. et sp.	3.7	6.8	1.5	9	6	Larson 2008
UALVP50579	Milk River Saurornitholestinae	Milk River Saurornitholestinae gen. et sp.	2.1	3.4	1.1	10	7	Larson 2008
UALVP50580	Milk River Saurornitholestinae	Milk River Saurornitholestinae gen. et sp.	2.64	3.48	1		7.5	Larson 2008
UALVP50581	Milk River Saurornitholestinae	Milk River Saurornitholestinae gen. et sp.	3.74	5.94	1.42	9.5	6	Larson 2008
UALVP50582	Milk River Saurornitholestinae	Milk River Saurornitholestinae gen. et sp.	3.07	4.73	1.08		5.6	Larson 2008
UALVP50583	Milk River Saurornitholestinae	Milk River Saurornitholestinae gen. et sp.	2.57	3.15	1.16	15	6	Larson 2008
UALVP50584	Milk River Saurornitholestinae	Milk River Saurornitholestinae gen. et sp.	3.82	6.14	1.48	6.2	4.9	Larson 2008
UALVP50585	Milk River Saurornitholestinae	Milk River Saurornitholestinae gen. et sp.	3.15	5.73	1.56		5.5	Larson 2008
UALVP50586	Milk River Saurornitholestinae	Milk River Saurornitholestinae gen. et sp.	1.64	1.88	0.72	10	7	Larson 2008
UALVP50587	Milk River Saurornitholestinae	Milk River Saurornitholestinae gen. et sp.	2.16	3.82	1.44		6.1	Larson 2008
UALVP50588	Milk River Saurornitholestinae	Milk River Saurornitholestinae gen. et sp.	2.44	3.28	1.12	7.7	6.1	Larson 2008
UALVP50589	Milk River Saurornitholestinae	Milk River Saurornitholestinae gen. et sp.	4.4	6.39	2.04	5.2	4.5	Larson 2008
UALVP50590	Milk River Saurornitholestinae	Milk River Saurornitholestinae gen. et sp.	4.65	6.97	1.94	6	4.3	Larson 2008
UALVP50591	Milk River Saurornitholestinae	Milk River Saurornitholestinae gen. et sp.	3.74	4.69	1.56	7	5	Larson 2008
UALVP50592	Milk River Saurornitholestinae	Milk River Saurornitholestinae gen. et sp.	3.49	6.47	1.6		5.2	Larson 2008
UALVP50593	Milk River Saurornitholestinae	Milk River Saurornitholestinae gen. et sp.	3.4	6.31	1.72	7.8	5	Larson 2008
UALVP50594	Milk River Saurornitholestinae	Milk River Saurornitholestinae gen. et sp.	3.4	4.48	1.36	6.2	4.8	Larson 2008
UALVP50595	Milk River Saurornitholestinae	Milk River Saurornitholestinae gen. et sp.	2.32	2.74	1.04	8.7	4.6	Larson 2008
UALVP50596	Milk River Saurornitholestinae	Milk River Saurornitholestinae gen. et sp.	3.15	3.32	1.36	5.5	4.7	Larson 2008
UALVP50597	Milk River Saurornitholestinae	Milk River Saurornitholestinae gen. et sp.	2.32	2.66	1.18	10.8	4.7	Larson 2008
UALVP50598	Milk River Saurornitholestinae	Milk River Saurornitholestinae gen. et sp.	4.07	5.98	1.54	8	5.6	Larson 2008
UALVP50599	Milk River Saurornitholestinae	Milk River Saurornitholestinae gen. et sp.	3.2	4.32	1.3	7.7	5.6	Larson 2008
UALVP50600	Milk River Saurornitholestinae	Milk River Saurornitholestinae gen. et sp.	2.57	2.99	1.12	11.5	6	Larson 2008
UALVP50601	Milk River Saurornitholestinae	Milk River Saurornitholestinae gen. et sp.	2.32	3.07	1.02	11	6	Larson 2008
UALVP50602	Milk River Saurornitholestinae	Milk River Saurornitholestinae gen. et sp.	2.57	2.82	1.02	10	6	Larson 2008
UALVP50603	Milk River Saurornitholestinae	Milk River Saurornitholestinae gen. et sp.	1.91	2.57	0.9	12.4	6	Larson 2008
UALVP50604	Milk River Saurornitholestinae	Milk River Saurornitholestinae gen. et sp.	4.48	5.77	1.8	7.4	5.1	Larson 2008
UALVP50605	Milk River Saurornitholestinae	Milk River Saurornitholestinae gen. et sp.	2.57	3.69	1.28	8	6	Larson 2008
UALVP50606	Milk River Saurornitholestinae	Milk River Saurornitholestinae gen. et sp.	3.74	4.81	1.36		6	Larson 2008
UALVP50607	Milk River Saurornitholestinae	Milk River Saurornitholestinae gen. et sp.	2.99	3.9	1.26	9	5.1	Larson 2008
UALVP50608	Milk River Saurornitholestinae	Milk River Saurornitholestinae gen. et sp.	2.49	3.49	1.02	8.8	6	Larson 2008
UALVP50609	Milk River Saurornitholestinae	Milk River Saurornitholestinae gen. et sp.	1.74	3.32	0.92		7.1	Larson 2008
UALVP50610	Milk River Saurornitholestinae	Milk River Saurornitholestinae gen. et sp.	3.9	4.98	1.64	7.5	4.6	Larson 2008
UALVP50611	Milk River Saurornitholestinae	Milk River Saurornitholestinae gen. et sp.	4.07	8.13	1.72	6.2	4.8	Larson 2008
UALVP50612	Milk River Saurornitholestinae	Milk River Saurornitholestinae gen. et sp.	3.4	4.57	1.58	8.3	4.9	Larson 2008
UALVP50613	Milk River Saurornitholestinae	Milk River Saurornitholestinae gen. et sp.	3.15	3.49	1.4		5	Larson 2008
UALVP50614	Milk River Saurornitholestinae	Milk River Saurornitholestinae gen. et sp.	3.65	5.23	1.6	7.8	5.2	Larson 2008
UALVP50615	Milk River Saurornitholestinae	Milk River Saurornitholestinae gen. et sp.	4.48	5.89	1.82	8	4.9	Larson 2008
CMNFV8725	Milk River Saurornitholestinae	Milk River Saurornitholestinae gen. et sp.	5.2	7.1	2.3	5.6	4.6	Larson 2008
UALVP48052	Milk River Saurornitholestinae	Milk River Saurornitholestinae gen. et sp.	2.66	5.06	1.62	9	6	Larson 2008
UALVP48081	Milk River Saurornitholestinae	Milk River Saurornitholestinae gen. et sp.	2.99	5.23	1.5	7	5.25	Larson 2008
UALVP50626	Milk River Saurornitholestinae	Milk River Saurornitholestinae gen. et sp.	3.15	5.98	1.56	7	5.2	Larson 2008
UALVP50627	Milk River Saurornitholestinae	Milk River Saurornitholestinae gen. et sp.	2.41	4.07	1.48		5	Larson 2008
UALVP50628	Milk River Saurornitholestinae	Milk River Saurornitholestinae gen. et sp.	3.07	4.9	1.62	6.66	5.2	Larson 2008
UALVP50629	Milk River Saurornitholestinae	Milk River Saurornitholestinae gen. et sp.	3.07	5.56	1.78		5.1	Larson 2008
Oldman Formation (77-76 Ma)
TMP 1995.177.0048c	Oldman Saurornitholestinae	Saurornitholestes langstoni	2.1	3.4	0.9		7	Sankey et al. 2002
TMP 1995.180.0004	Oldman Saurornitholestinae	Saurornitholestes langstoni	2.1	3.5	0.7		5	Sankey et al. 2002
TMP 1995.092.0027	Oldman Saurornitholestinae	Saurornitholestes langstoni	2.8	6.5	1.4		4.5	Sankey et al. 2002
TMP 1987.154.0063	Oldman Saurornitholestinae	Saurornitholestes langstoni	3.4	8.1	1.9		4.25	Sankey et al. 2002
TMP 1987.154.0064	Oldman Saurornitholestinae	Saurornitholestes langstoni	4.2	8.5	2		4.5	Sankey et al. 2002
TMP 1987.079.0090	Oldman Saurornitholestinae	Saurornitholestes langstoni	4.4	8.5	1.9		4	Sankey et al. 2002
TMP 1995.177.0048a	Oldman Saurornitholestinae	Saurornitholestes langstoni	2.9	6	1.5		4	Sankey et al. 2002
TMP 1995.177.0048b	Oldman Saurornitholestinae	Saurornitholestes langstoni	1.9	4.7	1		5.5	Sankey et al. 2002
TMP 1995.092.0016	Oldman Saurornitholestinae	Saurornitholestes langstoni	5	12.5	2.2		4	Sankey et al. 2002
TMP 1995.092.0016	Oldman Saurornitholestinae	Saurornitholestes langstoni	5	13.5	2.2		4.5	Sankey et al. 2002
TMP 1987.153.0055	Oldman Saurornitholestinae	Saurornitholestes langstoni	6	12	2.9		4	Sankey et al. 2002
TMP 1987.077.0120	Oldman Saurornitholestinae	Saurornitholestes langstoni	5.3	11.3	3.2		3.75	Sankey et al. 2002
TMP 1995.092.0054	Oldman Saurornitholestinae	Saurornitholestes langstoni	6.9	13	3.1		4	Sankey et al. 2002
TMP 1995.092.0028	Oldman Saurornitholestinae	Saurornitholestes langstoni	2	5	1.1		5	Sankey et al. 2002
TMP 1987.062.0087	Oldman Saurornitholestinae	Saurornitholestes langstoni	4.4	10.3	2.3		4	Sankey et al. 2002
TMP 1988.121.0039	Oldman Saurornitholestinae	Saurornitholestes langstoni	5.1	9	2.3	6	4	Currie and Varricchio 2004
TMP 2003.012.0083	Oldman Saurornitholestinae	Saurornitholestes langstoni	4.96	7.89	2.48	6.2	5.26	Longrich 2008
TMP 2000.057.0080	Oldman Saurornitholestinae	Saurornitholestes langstoni	3.8	7.91	2.25		3.88	Longrich 2008
TMP 2002.079.0004	Oldman Saurornitholestinae	Saurornitholestes langstoni	5.08	9	2.14	5.98	3.9	Longrich 2008
TMP 2002.079.0003	Oldman Saurornitholestinae	Saurornitholestes langstoni	5.28	9.08	2.13	6.14	5.06	Longrich 2008
Dinosaur Park Formation (76-75 Ma)
TMP 1974.010.0001	Saurornitholestes langstoni	Saurornitholestes langstoni*	4.2	8.5	2.3	6.5	4	this study
TMP 1974.010.0001	Saurornitholestes langstoni	Saurornitholestes langstoni*	4	7.9	2	7.1	4.4	this study
TMP 1987.158.0078	Saurornitholestes langstoni	Saurornitholestes langstoni	2.7	4.2	1.1		6.5	Sankey et al. 2002
TMP 1987.019.0068	Saurornitholestes langstoni	Saurornitholestes langstoni	2	4.6	1		6	Sankey et al. 2002
TMP 1987.031.0054	Saurornitholestes langstoni	Saurornitholestes langstoni	2.4	4.8	1.1		5.5	Sankey et al. 2002
TMP 1987.004.0047	Saurornitholestes langstoni	Saurornitholestes langstoni	2.2	4.1	0.7		7	Sankey et al. 2002
TMP 1987.048.0077	Saurornitholestes langstoni	Saurornitholestes langstoni	4.6	6.7	1.7		5	Sankey et al. 2002
TMP 1995.127.0025c	Saurornitholestes langstoni	Saurornitholestes langstoni	3.7	6.7	1.8		4.25	Sankey et al. 2002
TMP 1995.147.0026	Saurornitholestes langstoni	Saurornitholestes langstoni	1.9	2.8	0.7		6.5	Sankey et al. 2002
TMP 1995.151.0010	Saurornitholestes langstoni	Saurornitholestes langstoni	2.4	3.9	0.9		6.5	Sankey et al. 2002
TMP 1995.181.0011	Saurornitholestes langstoni	Saurornitholestes langstoni	1.9	5	1		5	Sankey et al. 2002
TMP 1996.012.0366	Saurornitholestes langstoni	Saurornitholestes langstoni	4.2	6.3	1.5		4.5	Sankey et al. 2002
TMP 1987.158.0080	Saurornitholestes langstoni	Saurornitholestes langstoni	3.9	9	1.9		4.25	Sankey et al. 2002
TMP 1987.158.0081	Saurornitholestes langstoni	Saurornitholestes langstoni	4.3	11.2	2		5	Sankey et al. 2002
TMP 1987.033.0055	Saurornitholestes langstoni	Saurornitholestes langstoni	4	9.9	2.1		4	Sankey et al. 2002
TMP 1987.036.0392	Saurornitholestes langstoni	Saurornitholestes langstoni	5.5	13	2.2		4	Sankey et al. 2002
TMP 1987.051.0023	Saurornitholestes langstoni	Saurornitholestes langstoni	3.8	8.2	1.4		5	Sankey et al. 2002
TMP 1987.072.0023	Saurornitholestes langstoni	Saurornitholestes langstoni	4.9	9.6	2.2		4	Sankey et al. 2002
TMP 1987.072.0026	Saurornitholestes langstoni	Saurornitholestes langstoni	5	13	2.3		4	Sankey et al. 2002
TMP 1987.072.0004	Saurornitholestes langstoni	Saurornitholestes langstoni	5.4	13	2.5		4	Sankey et al. 2002
TMP 1995.012.0109	Saurornitholestes langstoni	Saurornitholestes langstoni	5.9	13	2.8		3.75	Sankey et al. 2002
TMP 1995.126.0029	Saurornitholestes langstoni	Saurornitholestes langstoni	5	12	2.1		5	Sankey et al. 2002
TMP 1995.127.0025a	Saurornitholestes langstoni	Saurornitholestes langstoni	5.3	11.8	2.3		4.25	Sankey et al. 2002
TMP 1995.127.0025b	Saurornitholestes langstoni	Saurornitholestes langstoni	4.5	7.8	1.8		4.75	Sankey et al. 2002
TMP 1995.127.0025d	Saurornitholestes langstoni	Saurornitholestes langstoni	4.2	7.5	1.7		4	Sankey et al. 2002
TMP 1995.129.0002	Saurornitholestes langstoni	Saurornitholestes langstoni	4.9	9.6	2.2		4	Sankey et al. 2002
TMP 1995.131.0012	Saurornitholestes langstoni	Saurornitholestes langstoni	5.1	9.5	2.1		4	Sankey et al. 2002
TMP 1995.137.0002a	Saurornitholestes langstoni	Saurornitholestes langstoni	5	9.2	2.3		4	Sankey et al. 2002
TMP 1995.137.0002b	Saurornitholestes langstoni	Saurornitholestes langstoni	4.9	10.5	2.1		4	Sankey et al. 2002
TMP 1995.179.0003	Saurornitholestes langstoni	Saurornitholestes langstoni	4.7	10.4	2.2		4.25	Sankey et al. 2002
TMP 1995.019.0004	Saurornitholestes langstoni	Saurornitholestes langstoni	4.2	8	1.5		4.5	Sankey et al. 2002
TMP 1995.002.0018	Saurornitholestes langstoni	Saurornitholestes langstoni	4.2	10.5	2.5		3.75	Sankey et al. 2002
TMP 1995.406.0005	Saurornitholestes langstoni	Saurornitholestes langstoni	4.7	10.3	2		5	Sankey et al. 2002
TMP 1996.012.0361	Saurornitholestes langstoni	Saurornitholestes langstoni	5.9	13	2.7		4	Sankey et al. 2002
TMP 1996.012.0363	Saurornitholestes langstoni	Saurornitholestes langstoni	4.8	9.2	2		4	Sankey et al. 2002
TMP 1996.012.0038	Saurornitholestes langstoni	Saurornitholestes langstoni	5.1	11.7	2.1		5	Sankey et al. 2002
TMP 1987.036.0011	Saurornitholestes langstoni	Saurornitholestes langstoni	4.5	9.5	2.4		4	Sankey et al. 2002
TMP 1987.043.0005	Saurornitholestes langstoni	Saurornitholestes langstoni	5.7	11.2	2.1		4.5	Sankey et al. 2002
TMP 1987.046.0053	Saurornitholestes langstoni	Saurornitholestes langstoni	4.8	9.4	2.2		4	Sankey et al. 2002
TMP 1996.012.0102	Saurornitholestes langstoni	Saurornitholestes langstoni	5.5	11.2	3.2		5	Sankey et al. 2002
TMP 1996.012.0104	Saurornitholestes langstoni	Saurornitholestes langstoni	5.6	10.8	2.6		4	Sankey et al. 2002
TMP 1996.012.0112	Saurornitholestes langstoni	Saurornitholestes langstoni	7.9	16	2.8		3.75	Sankey et al. 2002
TMP 1996.012.0115	Saurornitholestes langstoni	Saurornitholestes langstoni	5.5	14	2.7		4.25	Sankey et al. 2002
TMP 1996.012.0118	Saurornitholestes langstoni	Saurornitholestes langstoni	5.1	9	2.2		5.5	Sankey et al. 2002
TMP 1996.012.0034	Saurornitholestes langstoni	Saurornitholestes langstoni	6.4	13	2.6		3.75	Sankey et al. 2002
TMP 1996.012.0360	Saurornitholestes langstoni	Saurornitholestes langstoni	5	9	1.9		4.25	Sankey et al. 2002
TMP 1996.012.0364	Saurornitholestes langstoni	Saurornitholestes langstoni	5.3	9	2.1		4	Sankey et al. 2002
TMP 1995.182.0021	Saurornitholestes langstoni	Saurornitholestes langstoni	3.5	7.6	1.7		4	Sankey et al. 2002
TMP 1995.184.0023	Saurornitholestes langstoni	Saurornitholestes langstoni	3.7	8.3	1.9		4	Sankey et al. 2002
TMP 1995.021.0005	Saurornitholestes langstoni	Saurornitholestes langstoni	4.7	9.2	2.4		3.75	Sankey et al. 2002
TMP 1987.112.0010	Saurornitholestes langstoni	Saurornitholestes langstoni	3.8	8.7	1.6		6	Sankey et al. 2002
TMP 1987.112.0021	Saurornitholestes langstoni	Saurornitholestes langstoni	5.6	6.3	1.4		4.75	Sankey et al. 2002
TMP 1987.112.0009	Saurornitholestes langstoni	Saurornitholestes langstoni	4.2	8.1	2		4.25	Sankey et al. 2002
TMP 1987.112.0028	Saurornitholestes langstoni	Saurornitholestes langstoni	5.5	11.5	2.2		4.25	Sankey et al. 2002
TMP 1987.050.0100	Saurornitholestes langstoni	Saurornitholestes langstoni	5.2	8.2	2.2		4.25	Sankey et al. 2002
TMP 1987.036.0184	Saurornitholestes langstoni	Saurornitholestes langstoni	3.5	7.5	1.9		4.25	Sankey et al. 2002
TMP 1987.036.0418	Saurornitholestes langstoni	Saurornitholestes langstoni	4.1	9.5	2.6		4.5	Sankey et al. 2002
TMP 1987.036.0070	Saurornitholestes langstoni	Saurornitholestes langstoni	4.1	9.5	2.4		4	Sankey et al. 2002
TMP 1987.036.0093	Saurornitholestes langstoni	Saurornitholestes langstoni	5.3	11.8	2.5		4.75	Sankey et al. 2002
TMP 1995.012.0031	Saurornitholestes langstoni	Saurornitholestes langstoni	5	10.5	2.4		4	Sankey et al. 2002
TMP 1995.012.0033	Saurornitholestes langstoni	Saurornitholestes langstoni	6	13	2.3		3.5	Sankey et al. 2002
TMP 1995.012.0038	Saurornitholestes langstoni	Saurornitholestes langstoni	5.7	11	2.2		3.75	Sankey et al. 2002
TMP 1995.012.0040	Saurornitholestes langstoni	Saurornitholestes langstoni	3.5	7.8	2		3.75	Sankey et al. 2002
TMP 1995.012.0042	Saurornitholestes langstoni	Saurornitholestes langstoni	2.9	7	1.7		4.5	Sankey et al. 2002
TMP 1995.012.0043	Saurornitholestes langstoni	Saurornitholestes langstoni	5	12	2.3		4	Sankey et al. 2002
TMP 1995.012.0074a	Saurornitholestes langstoni	Saurornitholestes langstoni	5.1	10.2	2.4		4	Sankey et al. 2002
TMP 1995.012.0074b	Saurornitholestes langstoni	Saurornitholestes langstoni	3.8	6.3	1.6		4.5	Sankey et al. 2002
TMP 1995.012.0074c	Saurornitholestes langstoni	Saurornitholestes langstoni	4.9	9.4	2.2		5.25	Sankey et al. 2002
TMP 1995.124.0004	Saurornitholestes langstoni	Saurornitholestes langstoni	3.3	6.2	1.5		4.25	Sankey et al. 2002
TMP 1987.036.0068	Saurornitholestes langstoni	Saurornitholestes langstoni	5.7	11.2	2.4		4.5	Sankey et al. 2002
TMP 1987.050.0038	Saurornitholestes langstoni	Saurornitholestes langstoni	6.3	14.2	2.4		4	Sankey et al. 2002
p74105no1	Saurornitholestes langstoni	Saurornitholestes langstoni	4	9		7	4.2	Farlow et al. 1991
p74105no2	Saurornitholestes langstoni	Saurornitholestes langstoni	4.1	8		7.2	4	Farlow et al. 1991
p8016440	Saurornitholestes langstoni	Saurornitholestes langstoni	5.1	9	2.2	6.4	4.2	Farlow et al. 1991
p848946	Saurornitholestes langstoni	Saurornitholestes langstoni	3.7	5		6	4	Farlow et al. 1991
p8120259	Saurornitholestes langstoni	Saurornitholestes langstoni	2.1	3		none	6	Farlow et al. 1991
p8216249	Saurornitholestes langstoni	Saurornitholestes langstoni	4.3	7		8	4	Farlow et al. 1991
p84989	Saurornitholestes langstoni	Saurornitholestes langstoni	5.1	9		6.4	4.6	Farlow et al. 1991
p8220173	Saurornitholestes langstoni	Saurornitholestes langstoni	3.1	5		9	5	Farlow et al. 1991
p80161515	Saurornitholestes langstoni	Saurornitholestes langstoni	5.9	10		5	4.2	Farlow et al. 1991
p808234	Saurornitholestes langstoni	Saurornitholestes langstoni	5.3	9		5	4	Farlow et al. 1991
Irvine Saurornitholestes 1	Saurornitholestes langstoni	Saurornitholestes langstoni	5.15	9.55		6.12	4.54	Longrich 2008
Irvine Saurornitholestes 2	Saurornitholestes langstoni	Saurornitholestes langstoni	5.7	10.97			4.34	Longrich 2008
Irvine Saurornitholestes 3	Saurornitholestes langstoni	Saurornitholestes langstoni	5.1	7.54		5.98	4.72	Longrich 2008
TMP 2005.049.0096	Saurornitholestes langstoni	Saurornitholestes langstoni	4.69	8.01	2.28	6.86	3.58	Longrich 2008
TMP 2005.049.0119	Saurornitholestes langstoni	Saurornitholestes langstoni	5.98	11.66	2.48	5.84	4.58	Longrich 2008
TMP 2005.049.0120	Saurornitholestes langstoni	Saurornitholestes langstoni	5.77	11.25	2.49		5.54	Longrich 2008
TMP 2005.049.0074	Saurornitholestes langstoni	Saurornitholestes langstoni	4.36	9.2	2.45		4.28	Longrich 2008
TMP 2005.049.0023	Saurornitholestes langstoni	Saurornitholestes langstoni	4.89	8.74	2.45	5.5	3.82	Longrich 2008
TMP 2005.039.0007	Saurornitholestes langstoni	Saurornitholestes langstoni	4.26	7.19	1.98	7.02	4.32	Longrich 2008
TMP 2005.039.0001	Saurornitholestes langstoni	Saurornitholestes langstoni	5.26	10.78	2.37	5.18	3.78	Longrich 2008
TMP 2005.012.0028	Saurornitholestes langstoni	Saurornitholestes langstoni	3.93	5.66	1.81		4.38	Longrich 2008
TMP 2005.009.0047	Saurornitholestes langstoni	Saurornitholestes langstoni	5.24	10.8	2.77		4.04	Longrich 2008
TMP 2004.116.0026	Saurornitholestes langstoni	Saurornitholestes langstoni	5.74	11.6	2.67		4.28	Longrich 2008
TMP 2004.103.0017	Saurornitholestes langstoni	Saurornitholestes langstoni	3.67	4.42	1.61		3.68	Longrich 2008
TMP 2004.012.0019	Saurornitholestes langstoni	Saurornitholestes langstoni	5.12	8.18	2.37	6.1	4.06	Longrich 2008
TMP 2003.012.0132	Saurornitholestes langstoni	Saurornitholestes langstoni	5.42	9.21	2.37	6.18	4.2	Longrich 2008
TMP 2002.060.0006	Saurornitholestes langstoni	Saurornitholestes langstoni	6.53	9.66	3.73	6.1	3.58	Longrich 2008
TMP 2001.012.0183	Saurornitholestes langstoni	Saurornitholestes langstoni	4.7	7.67	2.17	8.42	4.34	Longrich 2008
TMP 2001.012.0180	Saurornitholestes langstoni	Saurornitholestes langstoni	5.6	8.31	2.45	8.64	5.44	Longrich 2008
TMP 2002.060.0008	Saurornitholestes langstoni	Saurornitholestes langstoni	5.62	10.04	2.37		4.04	Longrich 2008
TMP 2001.012.0019	Saurornitholestes langstoni	Saurornitholestes langstoni	4.33	9.2		4.78	3.54	Longrich 2008
TMP 2000.012.0111	Saurornitholestes langstoni	Saurornitholestes langstoni	5.77	11.03	2.41	6.88	4.5	Longrich 2008
TMP 2000.057.0006	Saurornitholestes langstoni	Saurornitholestes langstoni	5.79	11.54	3.16		3.82	Longrich 2008
TMP 2000.012.0116	Saurornitholestes langstoni	Saurornitholestes langstoni	4.66	10.1	2.57		4.8	Longrich 2008
TMP 2000.012.0114	Saurornitholestes langstoni	Saurornitholestes langstoni	4.75	7.58	2.38	4.88	4.3	Longrich 2008
TMP 2005.012.??	Saurornitholestes langstoni	Saurornitholestes langstoni	7.5	12.85	3.68		4.9	Longrich 2008
TMP 2004.012.0018	Saurornitholestes langstoni	Saurornitholestes langstoni	7.07	8.38	3.13		5.36	Longrich 2008
TMP 2003.012.0189	Saurornitholestes langstoni	Saurornitholestes langstoni	5.34	10.1	2.82		3.88	Longrich 2008
TMP 1983.036.0236	Saurornitholestes langstoni	Saurornitholestes langstoni	3.82	7.52	1.75	8.34	6.1	Longrich 2008
TMP 1995.012.0026	Saurornitholestes langstoni	Saurornitholestes langstoni	1.69	2.2	0.83	6.12	5.42	Longrich 2008
Two Medicine Formation, Montana (83-74 Ma, 76.7 for B. feinbergi)
AMNH 001	Bambiraptor feinbergi	Bambiraptor feinbergi	2.37	5.33	1.41		5	Smith et al. 2005
AMNH 001	Bambiraptor feinbergi	Bambiraptor feinbergi	2.34	5.01	1.41		4	Smith et al. 2005
AMNH 001	Bambiraptor feinbergi	Bambiraptor feinbergi	2.08	4.82	1.4		6	Smith et al. 2005
AMNH 001	Bambiraptor feinbergi	Bambiraptor feinbergi	2.37	4.91	1.61		6	Smith et al. 2005
AMNH 001	Bambiraptor feinbergi	Bambiraptor feinbergi	2.47	5.58	1.24		4.8	Smith et al. 2005
AMNH 001	Bambiraptor feinbergi	Bambiraptor feinbergi	2.61	5.99	1.41		5	Smith et al. 2005
AMNH 001	Bambiraptor feinbergi	Bambiraptor feinbergi	2.35	5.86	1.2		4.84	Smith et al. 2005
AMNH 001	Bambiraptor feinbergi	Bambiraptor feinbergi	2.54	4.62	0.99		6.5	Smith et al. 2005
AMNH 001	Bambiraptor feinbergi	Bambiraptor feinbergi	3.22	5.66	1.37		4.74	Smith et al. 2005
AMNH 001	Bambiraptor feinbergi	Bambiraptor feinbergi	2.15	4.03	1.57		5	Smith et al. 2005
Aguja Middle Campanian (~79 Ma)
LSUMG726:5923	N/A	Saurornitholestinae indet.	4	5.3	2		4.5	Sankey et al. 2005
LSUMG746:6281	N/A	Saurornitholestinae indet.	4.8	7.2	2.5		6.5	Sankey et al. 2005
LSUMG140:6139	N/A	Saurornitholestinae indet.	3.7	5.2	1.6		5	Sankey et al. 2005
LSUMG489:5659	N/A	Saurornitholestinae indet.	2.3	2.8	1.4		5	Sankey et al. 2005
LSUMG491:5950	N/A	Saurornitholestinae indet.	2	2.2	1.1		6	Sankey et al. 2005
LSUMG113:5109	N/A	Saurornitholestinae indet.	2.8	4	1.2		6	Sankey et al. 2005
LSUMG113:1309	N/A	Saurornitholestinae indet.	1.8	2.2	0.8		7	Sankey et al. 2005
LSUMG113:1307	N/A	Saurornitholestinae indet.	4	6.2	1.8		9	Sankey et al. 2005
LSUMG113:1308	N/A	Saurornitholestinae indet.	4	5.5	1.9		5	Sankey et al. 2005
LSUMG726:6218	N/A	Saurornitholestinae indet.	8.3	15	5.8		5	Sankey et al. 2005
LSUMG834:8211	N/A	Saurornitholestinae indet.	7	10	3.5		3.5	Sankey et al. 2005
LSUMG741:6023	N/A	Saurornitholestinae indet.	2	3	1.2		4.5	Sankey et al. 2005
LSUMG113:1375	N/A	Saurornitholestinae indet.	3.6	5.5	3.2		6.5	Sankey et al. 2005
Horseshoe Canyon Formation (68-72 Ma)
TMP1995.166.0001	Atrociraptor marshalli	Atrociraptor marshalli*	5	10	3.5	2.7	2.3	Currie and Varricchio 2004
TMP1995.166.0001	Atrociraptor marshalli	Atrociraptor marshalli*	6.1	13		6	4	Currie and Varricchio 2004
TMP1995.166.0001	Atrociraptor marshalli	Atrociraptor marshalli*	6.6	15.3		5	4	Currie and Varricchio 2004
TMP1995.166.0001	Atrociraptor marshalli	Atrociraptor marshalli*	5.5	11.9		6	4	Currie and Varricchio 2004
TMP1995.166.0001	Atrociraptor marshalli	Atrociraptor marshalli*	5.6	7.8		7	4	Currie and Varricchio 2004
TMP1995.166.0001	Atrociraptor marshalli	Atrociraptor marshalli*	5.6	10.5		5.5	4	Currie and Varricchio 2004
TMP1995.166.0001	Atrociraptor marshalli	Atrociraptor marshalli*	4.4	7		8	4.5	Currie and Varricchio 2004
TMP1995.166.0001	Atrociraptor marshalli	Atrociraptor marshalli*	5.5	12	3.5	3.5	3	Currie and Varricchio 2004
TMP1995.166.0001	Atrociraptor marshalli	Atrociraptor marshalli*	3.2	5.7		6	5	Currie and Varricchio 2004
TMP1995.166.0001	Atrociraptor marshalli	Atrociraptor marshalli*	5.5	11.3		5.5	4	Currie and Varricchio 2004
TMP1995.166.0001	Atrociraptor marshalli	Atrociraptor marshalli*	5.2	7.5	2.8	5	4	Currie and Varricchio 2004
TMP1995.166.0001	Atrociraptor marshalli	Atrociraptor marshalli*	5.2	7	2.6	8	4	Currie and Varricchio 2004
TMP 1993.012.0021	Atrociraptor marshalli	Atrociraptor marshalli	4.98	7.68	2.48	3.1	2.8	this study
TMP 2005.007.0003	Atrociraptor marshalli	Atrociraptor marshalli	5.15	8.38	2.4	5.2	3.2	this study
TMP 1990.082.0018	Atrociraptor marshalli	Atrociraptor marshalli	5.81	9.12	2.88	5	3.2	this study
TMP 1990.082.0108	Atrociraptor marshalli	Atrociraptor marshalli	5.23	9.36	2.76	2.9	2.8	this study
TMP 1990.082.0017	Atrociraptor marshalli	Atrociraptor marshalli	4.73	7.55	2.4	5.1	3.5	this study
TMP 1990.082.0021	Atrociraptor marshalli	Atrociraptor marshalli	4.65	6.64	2.36	5.8	3.05	this study
TMP 1986.064.0003	Atrociraptor marshalli	Atrociraptor marshalli	5.06	9.6	2.56	5	3.4	this study
TMP 1986.064.0002	Atrociraptor marshalli	Atrociraptor marshalli	3.15	4.07	1.58	5.2	3	this study
TMP 1985.012.0002	Atrociraptor marshalli	Atrociraptor marshalli	3.24	5.06	1.72	5	3	this study
TMP 1985.098.0002	Atrociraptor marshalli	Atrociraptor marshalli	5.48	9.52	2.56	5.4	3.5	this study
TMP 1984.064.0003	Atrociraptor marshalli	Atrociraptor marshalli	4.32	5.48	1.88	7.7	4.7	this study
TMP 1984.064.0012	Atrociraptor marshalli	Atrociraptor marshalli	4.48	7.3	2.32	5.2	3.5	this study
TMP 1984.079.0004	Atrociraptor marshalli	Atrociraptor marshalli	5.6	8	2.6	5.1	3.3	this study
TMP 1965.016.0150	Atrociraptor marshalli	Atrociraptor marshalli	4.73	7.22	2.56	none	3.7	this study
TMP 1999.050.0117	Atrociraptor marshalli	Atrociraptor marshalli	4.07	6.39	1.99	5.7	3.5	this study
TMP 2000.045.0035	Atrociraptor marshalli	Atrociraptor marshalli	3.9	5.81	2.08	5.4	4	this study
TMP 2000.045.0103	Atrociraptor marshalli	Atrociraptor marshalli	4.9	10.15	2.41	4.5	3.1	this study
TMP 2003.045.0052	Atrociraptor marshalli	Atrociraptor marshalli	4.65	7.06	n/a	6	4	this study
TMP 2003.045.0049	Atrociraptor marshalli	Atrociraptor marshalli	4.23	6.56	2.16	4.6	4	this study
Lance Formation (65.5-66.5 Ma)
UCMP187070	Lance Saurornitholestinae	Lancian Saurornitholestinae gen. et sp.	2.5	5			6	Sankey 2008
UCMP124401	Lance Saurornitholestinae	Lancian Saurornitholestinae gen. et sp.	4.5	8			5	Sankey 2008
UCMP187079	Lance Saurornitholestinae	Lancian Saurornitholestinae gen. et sp.	2.2	4			6	Sankey 2008
UCMP187054	Lance Saurornitholestinae	Lancian Saurornitholestinae gen. et sp.	3	4.5			7	Sankey 2008
UCMP187027	Lance Saurornitholestinae	Lancian Saurornitholestinae gen. et sp.	4	7			6	Sankey 2008
UCMP186891	Lance Saurornitholestinae	Lancian Saurornitholestinae gen. et sp.	7	17			4.5	Sankey 2008
DSCN 1690	Lance Saurornitholestinae	Lancian Saurornitholestinae gen. et sp.	6.81	13.89	2.72	5.44	4.16	Longrich 2008
DSCN 1498	Lance Saurornitholestinae	Lancian Saurornitholestinae gen. et sp.	2.88	6.48			4.96	Longrich 2008
AMNH A	Lance Saurornitholestinae	Lancian Saurornitholestinae gen. et sp.	5.07	7.24	2.32		4.5	Longrich 2008
AMNH (M?)	Lance Saurornitholestinae	Lancian Saurornitholestinae gen. et sp.	5.72	8.7	2.57		4.28	Longrich 2008
AMNH (5412?)	Lance Saurornitholestinae	Lancian Saurornitholestinae gen. et sp.	5.62	11.18	2.68		4.68	Longrich 2008
AMNH (5412?) L	Lance Saurornitholestinae	Lancian Saurornitholestinae gen. et sp.	5.77	10.15	2.6		4.06	Longrich 2008
AMNH (5412?) R	Lance Saurornitholestinae	Lancian Saurornitholestinae gen. et sp.	6.32	9.28	2.74	5.02	3.82	Longrich 2008
AMNH (5412?) N	Lance Saurornitholestinae	Lancian Saurornitholestinae gen. et sp.	5.4	9.41	2.81		3.96	Longrich 2008
AMNH (5412?) K	Lance Saurornitholestinae	Lancian Saurornitholestinae gen. et sp.	5.6	8.55	2.42	5.98	4.5	Longrich 2008
AMNH (5412?) Q	Lance Saurornitholestinae	Lancian Saurornitholestinae gen. et sp.	5.6	7.8	2.89		3.96	Longrich 2008
AMNH27099: 5457a	Lance Saurornitholestinae	Lancian Saurornitholestinae gen. et sp.	6.7	8.48	2.83	5.74	4.28	Longrich 2008
AMNH27099: 5457b	Lance Saurornitholestinae	Lancian Saurornitholestinae gen. et sp.	5.8	10.34	3.1		3.84	Longrich 2008
AMNH27099: 5462a	Lance Saurornitholestinae	Lancian Saurornitholestinae gen. et sp.	6.13	9.7	2.54	5.1	4.34	Longrich 2008
AMNH27099: 5462b	Lance Saurornitholestinae	Lancian Saurornitholestinae gen. et sp.	5.5	8.35	2.34	8.82	5	Longrich 2008
AMNH27099: 5464	Lance Saurornitholestinae	Lancian Saurornitholestinae gen. et sp.	7.12	10.8	3.5	5.82	3.52	Longrich 2008
AMNH5475a	Lance Saurornitholestinae	Lancian Saurornitholestinae gen. et sp.	5.7	8.49	2.22		4.54	Longrich 2008
AMNH5475b	Lance Saurornitholestinae	Lancian Saurornitholestinae gen. et sp.	5.49	7.36	2.6	7.74	4	Longrich 2008
AMNH5477L	Lance Saurornitholestinae	Lancian Saurornitholestinae gen. et sp.	4.73	6.83	1.89	7.38	5.16	Longrich 2008
AMNH5477R	Lance Saurornitholestinae	Lancian Saurornitholestinae gen. et sp.	4.78	7.02	2.04	6.66	4.16	Longrich 2008
AMNH5695	Lance Saurornitholestinae	Lancian Saurornitholestinae gen. et sp.	5.52	10.6	3.02		4.54	Longrich 2008
AMNH(M) 5690	Lance Saurornitholestinae	Lancian Saurornitholestinae gen. et sp.	6.25	13.16	3.63		3.64	Longrich 2008
AMNH5688	Lance Saurornitholestinae	Lancian Saurornitholestinae gen. et sp.	3.48	6.87	2.17		4.58	Longrich 2008
AMNH5688 cent	Lance Saurornitholestinae	Lancian Saurornitholestinae gen. et sp.	4.08	7.99	1.56		5	Longrich 2008
AMNH5682	Lance Saurornitholestinae	Lancian Saurornitholestinae gen. et sp.	4.05	7.69	2.55		4.32	Longrich 2008
AMNH5697	Lance Saurornitholestinae	Lancian Saurornitholestinae gen. et sp.	4.48	10.73	3.08		4.76	Longrich 2008
AMNH5703	Lance Saurornitholestinae	Lancian Saurornitholestinae gen. et sp.	3.14	7.73	2.01		5.1	Longrich 2008
AMNH5671.2	Lance Saurornitholestinae	Lancian Saurornitholestinae gen. et sp.	4.99	8.85	2.19		4.48	Longrich 2008
AMNH5545.1	Lance Saurornitholestinae	Lancian Saurornitholestinae gen. et sp.	4.42	7.8			4.72	Longrich 2008
AMNH5671.1	Lance Saurornitholestinae	Lancian Saurornitholestinae gen. et sp.	4.84	6.45	2.07		4.96	Longrich 2008
UCMP187125	N/A	Lancian Saurornitholestinae indet. (possibly cf. Zapsalis sp.)	4	7			4	Sankey 2008
UCMP187129	N/A	Lancian Saurornitholestinae indet. (possibly cf. Zapsalis sp.)	4	9			4.5	Sankey 2008
UCMP187124	N/A	Lancian Saurornitholestinae indet. (possibly cf. Zapsalis sp.)	6	12			4	Sankey 2008
UCMP187105	N/A	Lancian Saurornitholestinae indet. (possibly cf. Zapsalis sp.)	5	8			5	Sankey 2008
UCMP187143	N/A	Lancian Saurornitholestinae indet. (possibly cf. Zapsalis sp.)	3.6	8			5	Sankey 2008
UCMP187139	N/A	Lancian Saurornitholestinae indet. (possibly cf. Zapsalis sp.)	3.2	7			5.5	Sankey 2008
Hell Creek Formation (65.5-66.75 Ma)
UCMP134801	Hell Creek Saurornitholesteinae	Lancian Saurornitholestinae gen. et sp.	3.7	10			5	Sankey 2008
UCMP187048	Hell Creek Saurornitholesteinae	Lancian Saurornitholestinae gen. et sp.	5.8	13			5	Sankey 2008
UCMP187049	Hell Creek Saurornitholesteinae	Lancian Saurornitholestinae gen. et sp.	3	6			7	Sankey 2008
UCMP186944	Hell Creek Saurornitholesteinae	Lancian Saurornitholestinae gen. et sp.	3.5	6			6	Sankey 2008
UCMP187194	Hell Creek Saurornitholesteinae	Lancian Saurornitholestinae gen. et sp.	3.2	5.5			6	Sankey 2008
UCMP186957	Hell Creek Saurornitholesteinae	Lancian Saurornitholestinae gen. et sp.	3.3	5			5.5	Sankey 2008
UCMP186962	Hell Creek Saurornitholesteinae	Lancian Saurornitholestinae gen. et sp.	3.4	5			5.5	Sankey 2008
UCMP187041	Hell Creek Saurornitholesteinae	Lancian Saurornitholestinae gen. et sp.	4	8			6	Sankey 2008
UCMP187042	Hell Creek Saurornitholesteinae	Lancian Saurornitholestinae gen. et sp.	3	5			6	Sankey 2008
UCMP187043	Hell Creek Saurornitholesteinae	Lancian Saurornitholestinae gen. et sp.	2.5	4.5			6.5	Sankey 2008
UCMP187044	Hell Creek Saurornitholesteinae	Lancian Saurornitholestinae gen. et sp.	3	4			6	Sankey 2008
UCMP187045	Hell Creek Saurornitholesteinae	Lancian Saurornitholestinae gen. et sp.	3	5			5	Sankey 2008
UCMP187046	Hell Creek Saurornitholesteinae	Lancian Saurornitholestinae gen. et sp.	2.3	4			8	Sankey 2008
UCMP187036	Hell Creek Saurornitholesteinae	Lancian Saurornitholestinae gen. et sp.	5	8			5	Sankey 2008
UCMP187034	Hell Creek Saurornitholesteinae	Lancian Saurornitholestinae gen. et sp.	6	12			4.5	Sankey 2008
UCMP187033	Hell Creek Saurornitholesteinae	Lancian Saurornitholestinae gen. et sp.	5	12			4	Sankey 2008
UCMP187030	Hell Creek Saurornitholesteinae	Lancian Saurornitholestinae gen. et sp.	5	8			5	Sankey 2008
UCMP187025	Hell Creek Saurornitholesteinae	Lancian Saurornitholestinae gen. et sp.	4	6			7	Sankey 2008
UCMP187006	Hell Creek Saurornitholesteinae	Lancian Saurornitholestinae gen. et sp.	6	12			5	Sankey 2008
UCMP187038	Hell Creek Saurornitholesteinae	Lancian Saurornitholestinae gen. et sp.	4	7			5.5	Sankey 2008
UCMP187010	Hell Creek Saurornitholesteinae	Lancian Saurornitholestinae gen. et sp.	3	6			6	Sankey 2008
UCMP187083	Hell Creek Saurornitholesteinae	Lancian Saurornitholestinae gen. et sp.	5	8			6	Sankey 2008
UCMP174796	Hell Creek Saurornitholesteinae	Lancian Saurornitholestinae gen. et sp.	3.4	5			4.5	Sankey 2008
UCMP187200	Hell Creek Saurornitholesteinae	Lancian Saurornitholestinae gen. et sp.	2.2	3.5			7	Sankey 2008
UCMP187197	Hell Creek Saurornitholesteinae	Lancian Saurornitholestinae gen. et sp.	3.5	5.5			5.5	Sankey 2008
UCMP187199	Hell Creek Saurornitholesteinae	Lancian Saurornitholestinae gen. et sp.	3.6	5			5.5	Sankey 2008
UCMP187198	Hell Creek Saurornitholesteinae	Lancian Saurornitholestinae gen. et sp.	2.6	4			7	Sankey 2008
UCMP186958	Hell Creek Saurornitholesteinae	Lancian Saurornitholestinae gen. et sp.	2.6	4			6	Sankey 2008
UCMP186959	Hell Creek Saurornitholesteinae	Lancian Saurornitholestinae gen. et sp.	3	5			7	Sankey 2008
UCMP186961	Hell Creek Saurornitholesteinae	Lancian Saurornitholestinae gen. et sp.	3.2	8			5	Sankey 2008
UCMP79095	Hell Creek Saurornitholesteinae	Lancian Saurornitholestinae gen. et sp.	4	7			6	Sankey 2008
UCMP124987	Hell Creek Saurornitholesteinae	Lancian Saurornitholestinae gen. et sp.	6	15			4	Sankey 2008
UCMP120339	Hell Creek Saurornitholesteinae	Lancian Saurornitholestinae gen. et sp.	9	17			4	Sankey 2008
UCMP186957	Hell Creek Saurornitholesteinae	Lancian Saurornitholestinae gen. et sp.	4.5	7			4.48	Sankey 2008
UCMP120305	Hell Creek Saurornitholesteinae	Lancian Saurornitholestinae gen. et sp.	9	17			3.5	Sankey 2008
UCMP186960	Hell Creek Saurornitholesteinae	Lancian Saurornitholestinae gen. et sp.	5	10			4.5	Sankey 2008
UCMP187037	Hell Creek Saurornitholesteinae	Lancian Saurornitholestinae gen. et sp.	3.6	10			4.5	Sankey 2008
UCMP187039	Hell Creek Saurornitholesteinae	Lancian Saurornitholestinae gen. et sp.	4.5	9			5	Sankey 2008
UCMP186967	Hell Creek Saurornitholesteinae	Lancian Saurornitholestinae gen. et sp.	7	13			4	Sankey 2008
UCMP186968	Hell Creek Saurornitholesteinae	Lancian Saurornitholestinae gen. et sp.	6	10			3.5	Sankey 2008
UCMP186972	Hell Creek Saurornitholesteinae	Lancian Saurornitholestinae gen. et sp.	6	10			4	Sankey 2008
UCMP186970	Hell Creek Saurornitholesteinae	Lancian Saurornitholestinae gen. et sp.	7	13			4	Sankey 2008
UCMP186973	Hell Creek Saurornitholesteinae	Lancian Saurornitholestinae gen. et sp.	2.8	7			5	Sankey 2008
UCMP186971	Hell Creek Saurornitholesteinae	Lancian Saurornitholestinae gen. et sp.	7	13			4	Sankey 2008
Milk River Formation (~83.5 Ma)
UALVP48460	Milk River Dromaeosauridae	Milk River Dromaeosauridae gen. et sp.	5.43	8.58	3.08	7	4	Larson 2008
UALVP48458	Milk River Dromaeosauridae	Milk River Dromaeosauridae gen. et sp.	3.82	4.57	2.36	4	3.6	Larson 2008
UALVP48480	Milk River Dromaeosauridae	Milk River Dromaeosauridae gen. et sp.	2.04	2.12	1.06	3	4	Larson 2008
UALVP48461	Milk River Dromaeosauridae	Milk River Dromaeosauridae gen. et sp.	7.53	9.98	3.84	6	3.5	Larson 2008
UALVP48462	Milk River Dromaeosauridae	Milk River Dromaeosauridae gen. et sp.	8.75	17.33	4.07	3.5	3	Larson 2008
UALVP50220	Milk River Dromaeosauridae	Milk River Dromaeosauridae gen. et sp.	7.88	14	4.9	4	3.5	Larson 2008
UALVP50221	Milk River Dromaeosauridae	Milk River Dromaeosauridae gen. et sp.	3.82	4.15	1.86	8.8	4	Larson 2008
UALVP50222	Milk River Dromaeosauridae	Milk River Dromaeosauridae gen. et sp.	5.81	6.39	3.04	5.5	4	Larson 2008
Milk River Formation (~83.5 Ma)
UALVP48422	Milk River Dromaeosaurinae	Milk River Dromaeosaurinae gen. et sp.	4.32	5.23	2.4	6	5	Larson 2008
UALVP48424	Milk River Dromaeosaurinae	Milk River Dromaeosaurinae gen. et sp.	5.48	11.55	3.4		4.1	Larson 2008
UALVP49568	Milk River Dromaeosaurinae	Milk River Dromaeosaurinae gen. et sp.	2.16	4.9	1.52		4.4	Larson 2008
UALVP49569	Milk River Dromaeosaurinae	Milk River Dromaeosaurinae gen. et sp.	4.32	7.06	1.88	9.4	4.6	Larson 2008
UALVP47995	Milk River Dromaeosaurinae	Milk River Dromaeosaurinae gen. et sp.	4.15	4.73	1.88		5	Larson 2008
UALVP47996	Milk River Dromaeosaurinae	Milk River Dromaeosaurinae gen. et sp.	3.74	4.07	1.52	7.5	4.5	Larson 2008
UALVP48062	Milk River Dromaeosaurinae	Milk River Dromaeosaurinae gen. et sp.	4.9	7.39	1.96	7	5	Larson 2008
UALVP48069	Milk River Dromaeosaurinae	Milk River Dromaeosaurinae gen. et sp.	3.32	6.64	1.62		5	Larson 2008
UALVP48071	Milk River Dromaeosaurinae	Milk River Dromaeosaurinae gen. et sp.	3.74	5.06	1.56	6.5	4.5	Larson 2008
UALVP48420	Milk River Dromaeosaurinae	Milk River Dromaeosaurinae gen. et sp.	6.3	9.1	2.8	5	4	Larson 2008
UALVP48426	Milk River Dromaeosaurinae	Milk River Dromaeosaurinae gen. et sp.	5.31	5.64	2.44	7	4.3	Larson 2008
UALVP48439	Milk River Dromaeosaurinae	Milk River Dromaeosaurinae gen. et sp.	8.58	15.93	5.06	5	4	Larson 2008
UALVP48472	Milk River Dromaeosaurinae	Milk River Dromaeosaurinae gen. et sp.	4.32	4.9	2.36	5.5	4.6	Larson 2008
UALVP49570	Milk River Dromaeosaurinae	Milk River Dromaeosaurinae gen. et sp.	3.49	4.73	1.6	7.4	4.5	Larson 2008
UALVP49571	Milk River Dromaeosaurinae	Milk River Dromaeosaurinae gen. et sp.	4.73	8.05	3		5	Larson 2008
UALVP49572	Milk River Dromaeosaurinae	Milk River Dromaeosaurinae gen. et sp.	2.3	3.4	1.2	8	5	Larson 2008
UALVP49573	Milk River Dromaeosaurinae	Milk River Dromaeosaurinae gen. et sp.	7.53	8.23	4.23	4.3	3.8	Larson 2008
UALVP49574	Milk River Dromaeosaurinae	Milk River Dromaeosaurinae gen. et sp.	8.75	11.38	6.56		4.6	Larson 2008
UALVP49575	Milk River Dromaeosaurinae	Milk River Dromaeosaurinae gen. et sp.	3.07	5.31	1.7		5.1	Larson 2008
UALVP49576	Milk River Dromaeosaurinae	Milk River Dromaeosaurinae gen. et sp.	3.4	6.97	1.78	7	5	Larson 2008
CMNFV uncat	Milk River Dromaeosaurinae	Milk River Dromaeosaurinae gen. et sp.	5.6	9.5	3	5	3.7	Larson 2008
UALVP48028	Milk River Dromaeosaurinae	Milk River Dromaeosaurinae gen. et sp.	2.66	4.98	2.32		4.6	Larson 2008
UALVP49594	Milk River Dromaeosaurinae	Milk River Dromaeosaurinae gen. et sp.	2.66	3.82	2.2		4.1	Larson 2008
UALVP49595	Milk River Dromaeosaurinae	Milk River Dromaeosaurinae gen. et sp.	2.74	5.73	2	6	4.25	Larson 2008
John Henry Member of Straight Cliffs Formation (85.8-?84 Ma)
UMNH 424-14398	N/A	Dromaeosaurinae indet.	3.97	4.44	2.15	7	5.1	this study
Oldman Formation (77-76 Ma)
TMP 1999.055.0328	Oldman Dromaeosaurinae	Dromaeosaurus albertensis	3.9	8.5	2.3		4	Sankey et al. 2002
TMP 1989.077.0006	Oldman Dromaeosaurinae	Dromaeosaurus albertensis	4.5	11.5	2.9		3.26	Sankey et al. 2002
TMP 1989.077.0006	Oldman Dromaeosaurinae	Dromaeosaurus albertensis	4.7	11	2.8		3.5	Sankey et al. 2002
TMP 1992.077.0002	Oldman Dromaeosaurinae	Dromaeosaurus albertensis	5.9	10.5	3.9		4	Sankey et al. 2002
TMP 1985.068.0032	Oldman Dromaeosaurinae	Dromaeosaurus albertensis	5.3	14.5	4.2		3.5	Sankey et al. 2002
TMP 1987.153.0056	Oldman Dromaeosaurinae	Dromaeosaurus albertensis	5.7	9.5	3.9		3.5	Sankey et al. 2002
Dinosaur Park Formation (76-75 Ma)
AMNH5356	Dromaeosaurus albertensis	Dromaeosaurus albertensis*	7.21	12.86	4.06	2.76	3.4	Smith et al. 2005
AMNH5356	Dromaeosaurus albertensis	Dromaeosaurus albertensis*	6.84	11.58	3.7	3	3	Smith et al. 2005
AMNH5356	Dromaeosaurus albertensis	Dromaeosaurus albertensis*	7.64	12.38	4.02	3.16	3.5	Smith et al. 2005
AMNH5356	Dromaeosaurus albertensis	Dromaeosaurus albertensis*	6.28	10.68	3.13	1.76	3	Smith et al. 2005
AMNH5356	Dromaeosaurus albertensis	Dromaeosaurus albertensis*	6.69	10.98	3.32	3	3.26	Smith et al. 2005
AMNH5356	Dromaeosaurus albertensis	Dromaeosaurus albertensis*	5.7	9.7	3.11	3.5	4.5	Smith et al. 2005
AMNH5356	Dromaeosaurus albertensis	Dromaeosaurus albertensis*	5.46	9.4	4.03	3	5	Smith et al. 2005
AMNH5356	Dromaeosaurus albertensis	Dromaeosaurus albertensis*	6.09	11.55	3.81	2.76	3	Smith et al. 2005
AMNH5356	Dromaeosaurus albertensis	Dromaeosaurus albertensis*	6.47	11.22	3.91	3	3.5	Smith et al. 2005
AMNH5356	Dromaeosaurus albertensis	Dromaeosaurus albertensis*	6.56	11.27	3.89	3	3.5	Smith et al. 2005
AMNH5356	Dromaeosaurus albertensis	Dromaeosaurus albertensis*	5.56	8.52	3.27	3.4	3.5	Smith et al. 2005
TMP 1985.036.0332	Dromaeosaurus albertensis	Dromaeosaurus albertensis	3.6	6.4	2.3		5	Sankey et al. 2002
TMP 1995.143.0045	Dromaeosaurus albertensis	Dromaeosaurus albertensis	4.1	9	2.8		4	Sankey et al. 2002
TMP 1980.008.0298	Dromaeosaurus albertensis	Dromaeosaurus albertensis	4.3	9.8	2.7		3	Sankey et al. 2002
TMP 1980.008.0308	Dromaeosaurus albertensis	Dromaeosaurus albertensis	4.9	8.5	2.7		3.5	Sankey et al. 2002
TMP 1981.016.0281	Dromaeosaurus albertensis	Dromaeosaurus albertensis	5	10	3.2		3	Sankey et al. 2002
TMP 1995.406.0004	Dromaeosaurus albertensis	Dromaeosaurus albertensis	5	11.4	3.5		3.5	Sankey et al. 2002
TMP 1986.130.0218	Dromaeosaurus albertensis	Dromaeosaurus albertensis	5.1	10.8	3.1		3.25	Sankey et al. 2002
TMP 1986.130.0211	Dromaeosaurus albertensis	Dromaeosaurus albertensis	5.2	9.5	3.1	3.04	3	Sankey et al. 2002 and Longrich 2008
TMP 1981.026.0175	Dromaeosaurus albertensis	Dromaeosaurus albertensis	5.4	11	3.2	3.96	3.5	Sankey et al. 2002 and Longrich 2008
TMP 1998.093.0172	Dromaeosaurus albertensis	Dromaeosaurus albertensis	5.4	10.5	2.9		3.5	Sankey et al. 2002
TMP 1981.014.0060	Dromaeosaurus albertensis	Dromaeosaurus albertensis	5.5	11.5	3.7		3.5	Sankey et al. 2002
TMP 1995.171.0040	Dromaeosaurus albertensis	Dromaeosaurus albertensis	5.5	12.3	3.7		4	Sankey et al. 2002
TMP 1995.171.0040	Dromaeosaurus albertensis	Dromaeosaurus albertensis	6.2	14	3.5		4	Sankey et al. 2002
TMP 1966.025.0016	Dromaeosaurus albertensis	Dromaeosaurus albertensis	5.7	14	3.3	3.72	3.25	Sankey et al. 2002 and Longrich 2008
TMP 1979.008.0732	Dromaeosaurus albertensis	Dromaeosaurus albertensis	6.1	13	3.9		3.5	Sankey et al. 2002
TMP 1980.016.2094	Dromaeosaurus albertensis	Dromaeosaurus albertensis	7.1	13.5	4		3.5	Sankey et al. 2002
TMP1981.027.0066	Dromaeosaurus albertensis	Dromaeosaurus albertensis	7	13.5	4.5		3	Sankey et al. 2002
TMP 1982.018.0137	Dromaeosaurus albertensis	Dromaeosaurus albertensis	6.4	11	4		3.25	Sankey et al. 2002
TMP 1983.067.0038	Dromaeosaurus albertensis	Dromaeosaurus albertensis	7.8	13.2	4.1		3	Sankey et al. 2002
TMP 1984.067.0115	Dromaeosaurus albertensis	Dromaeosaurus albertensis	6	12	3.2	3.48	3.5	Sankey et al. 2002 and Longrich 2008
TMP 1984.089.0048	Dromaeosaurus albertensis	Dromaeosaurus albertensis	6	14.5	3.5		4.5	Sankey et al. 2002
TMP 1986.018.0099	Dromaeosaurus albertensis	Dromaeosaurus albertensis	6	13.5	3.7		3.25	Sankey et al. 2002
TMP 1986.076.0011	Dromaeosaurus albertensis	Dromaeosaurus albertensis	7.9	17.2	5.1		3.5	Sankey et al. 2002
TMP1989.155.0002	Dromaeosaurus albertensis	Dromaeosaurus albertensis	7.9	14.5	4		3.25	Sankey et al. 2002
TMP 1989.036.0354	Dromaeosaurus albertensis	Dromaeosaurus albertensis	6.1	13	3.7		3	Sankey et al. 2002
TMP 1993.036.0460	Dromaeosaurus albertensis	Dromaeosaurus albertensis	5.4	16.5	4		3	Sankey et al. 2002
TMP 1993.036.0462	Dromaeosaurus albertensis	Dromaeosaurus albertensis	6.5	13.5	3.7		3.5	Sankey et al. 2002
TMP 1993.036.0472	Dromaeosaurus albertensis	Dromaeosaurus albertensis	6.5	13	4		3.75	Sankey et al. 2002
TMP 1994.012.0241	Dromaeosaurus albertensis	Dromaeosaurus albertensis	7.2	15.5	3.9		3.75	Sankey et al. 2002
TMP 1994.012.0247	Dromaeosaurus albertensis	Dromaeosaurus albertensis	7.1	15.5	4.3		3	Sankey et al. 2002
TMP 1994.012.0652	Dromaeosaurus albertensis	Dromaeosaurus albertensis	6.4	12.5	4.3		3.75	Sankey et al. 2002
TMP 1994.172.0039	Dromaeosaurus albertensis	Dromaeosaurus albertensis	5.6	12	3.9		3	Sankey et al. 2002
TMP 1995.127.0026-a	Dromaeosaurus albertensis	Dromaeosaurus albertensis	6.3	10.5	3.6		3	Sankey et al. 2002
TMP 1995.137.0001	Dromaeosaurus albertensis	Dromaeosaurus albertensis	6.1	10.5	3.3		5	Sankey et al. 2002
TMP 1996.012.0362	Dromaeosaurus albertensis	Dromaeosaurus albertensis	6.3	13.5	3.9		3.25	Sankey et al. 2002
TMP 1995.151.0010	Dromaeosaurus albertensis	Dromaeosaurus albertensis	6.8	13	3.3		3.75	Sankey et al. 2002
TMP 1979.014.1000	Dromaeosaurus albertensis	Dromaeosaurus albertensis	4.2	8.8	2.7		3	Sankey et al. 2002
TMP 1979.015.0002	Dromaeosaurus albertensis	Dromaeosaurus albertensis	5.5	13	3.9		3	Sankey et al. 2002
TMP 1981.016.0161	Dromaeosaurus albertensis	Dromaeosaurus albertensis	4	10.5	3		3	Sankey et al. 2002
TMP 1981.022.0093	Dromaeosaurus albertensis	Dromaeosaurus albertensis	3.5	7.8	2.7		3.5	Sankey et al. 2002
TMP 1984.089.0047	Dromaeosaurus albertensis	Dromaeosaurus albertensis	5	11	4.1		3.25	Sankey et al. 2002
TMP 1985.036.0336	Dromaeosaurus albertensis	Dromaeosaurus albertensis	4.9	11	3.5		4	Sankey et al. 2002
TMP 1985.052.0010	Dromaeosaurus albertensis	Dromaeosaurus albertensis	3.8	6.5	2		4.5	Sankey et al. 2002
TMP 1985.059.0081	Dromaeosaurus albertensis	Dromaeosaurus albertensis	5.5	12	3.4		3.25	Sankey et al. 2002
TMP 1985.068.0047	Dromaeosaurus albertensis	Dromaeosaurus albertensis	4.9	9.8	2.5		3.25	Sankey et al. 2002
TMP 1986.054.0067	Dromaeosaurus albertensis	Dromaeosaurus albertensis	3.8	8	2.8		3.5	Sankey et al. 2002
TMP 1988.050.0127	Dromaeosaurus albertensis	Dromaeosaurus albertensis	4.1	10	2.5		3.5	Sankey et al. 2002
TMP 1990.145.0001	Dromaeosaurus albertensis	Dromaeosaurus albertensis	5.8	10.7	3.9		3	Sankey et al. 2002
TMP 1994.012.0266	Dromaeosaurus albertensis	Dromaeosaurus albertensis	3.8	9.2	2.9		3	Sankey et al. 2002
TMP 1995.134.0005	Dromaeosaurus albertensis	Dromaeosaurus albertensis	5.1	11	4.2		3.5	Sankey et al. 2002
TMP 1995.151.0008	Dromaeosaurus albertensis	Dromaeosaurus albertensis	4.3	10.5	3.1		3.5	Sankey et al. 2002
TMP 1995.181.0009	Dromaeosaurus albertensis	Dromaeosaurus albertensis	3	7.3	2.1		4	Sankey et al. 2002
Bobs site	Dromaeosaurus albertensis	Dromaeosaurus albertensis	6	13	4.6		3	Sankey et al. 2002
p812648	Dromaeosaurus albertensis	Dromaeosaurus albertensis	6.2	11		3.4	3.6	Farlow et al. 1991
p80897	Dromaeosaurus albertensis	Dromaeosaurus albertensis	7	1		3	2.8	Farlow et al. 1991
p836738	Dromaeosaurus albertensis	Dromaeosaurus albertensis	7.8	12	4.2	3.4	3	Farlow et al. 1991
CMNFVuncat	Dromaeosaurus albertensis	Dromaeosaurus albertensis	7.1	11		3.2	3	Farlow et al. 1991
CMNFVuncat	Dromaeosaurus albertensis	Dromaeosaurus albertensis	6	12		3.2	3	Farlow et al. 1991
p8218137	Dromaeosaurus albertensis	Dromaeosaurus albertensis	6.2	9		3.2	3.2	Farlow et al. 1991
p8220388	Dromaeosaurus albertensis	Dromaeosaurus albertensis	7.9	19		3.6	3.2	Farlow et al. 1991
p849912	Dromaeosaurus albertensis	Dromaeosaurus albertensis	7.4	14		4	3.4	Farlow et al. 1991
TMP 1980.008.0214	Dromaeosaurus albertensis	Dromaeosaurus albertensis	5.04	9.04	3.12		5.02	Longrich 2008
TMP 1985.066.0056	Dromaeosaurus albertensis	Dromaeosaurus albertensis	5.16	10.96	2.96	2.84	3.04	Longrich 2008
TMP 2001.012.0179	Dromaeosaurus albertensis	Dromaeosaurus albertensis	5.04	10.31		2.56	2.84	Longrich 2008
TMP 2001.012.0181	Dromaeosaurus albertensis	Dromaeosaurus albertensis	7.3	12.52	4.53	3.04	2.94	Longrich 2008
Horseshoe Canyon Formation (68-72 Ma)
TMP 1998.084.0003	N/A	Dromaeosaurinae indet.	7.39	8.88	3.44	4.4	4	this study
TMP 1985.098.0005	N/A	Dromaeosaurinae indet.	4.73	9.28	3	2.8	3	this study
TMP 1983.045.0003	N/A	Dromaeosaurinae indet.	4.81	11.2	4.03	4.9	5	this study
TMP 2003.045.0060	Horseshoe Canyon Dromaeosaurinae	Horseshoe Canyon Dromaeosaurinae gen. et sp.	5.43	9.63	2.49	4	4	this study
TMP 1998.063.0071	Horseshoe Canyon Dromaeosaurinae	Horseshoe Canyon Dromaeosaurinae gen. et sp.	4.57	6.56	1.99	4.3	4.3	this study
TMP 1998.064.0017	Horseshoe Canyon Dromaeosaurinae	Horseshoe Canyon Dromaeosaurinae gen. et sp.	5.95	9.63	3.15	5	3.3	this study
TMP 1999.050.0116	Horseshoe Canyon Dromaeosaurinae	Horseshoe Canyon Dromaeosaurinae gen. et sp.	7.7	11.73	4.03	4	3.5	this study
TMP 2000.045.0040	Horseshoe Canyon Dromaeosaurinae	Horseshoe Canyon Dromaeosaurinae gen. et sp.	6.56	9.98	2.82	4.5	3.8	this study
TMP 2000.045.0102	Horseshoe Canyon Dromaeosaurinae	Horseshoe Canyon Dromaeosaurinae gen. et sp.	6.48	9.63	2.91		4	this study
TMP 2000.045.0082	Horseshoe Canyon Dromaeosaurinae	Horseshoe Canyon Dromaeosaurinae gen. et sp.	6.13	11.03	3.4	3.8	3.2	this study
TMP 2001.045.0083	Horseshoe Canyon Dromaeosaurinae	Horseshoe Canyon Dromaeosaurinae gen. et sp.	7.88	16.63	4.73	4	3	this study
TMP 2002.045.0050	Horseshoe Canyon Dromaeosaurinae	Horseshoe Canyon Dromaeosaurinae gen. et sp.	6.65	11.2	3.32	4.3	3.6	this study
TMP 1998.063.0032	Horseshoe Canyon Dromaeosaurinae	Horseshoe Canyon Dromaeosaurinae gen. et sp.	7.44	11.76	4.06	4.1	3.1	this study
TMP 2009.122.0004	Horseshoe Canyon Dromaeosaurinae	Horseshoe Canyon Dromaeosaurinae gen. et sp.	6.56	9.92	3.2	4.3	3.5	this study
TMP 2009.122.0002	Horseshoe Canyon Dromaeosaurinae	Horseshoe Canyon Dromaeosaurinae gen. et sp.	5.4	8.8	3	3.8	3.4	this study
TMP 2005.007.0005	Horseshoe Canyon Dromaeosaurinae	Horseshoe Canyon Dromaeosaurinae gen. et sp.	3.57	8.16	2.44	none	3.8	this study
Milk River Formation (~83.5 Ma)
UALVP48431	Milk River cf. Zapsalis	Milk River cf. Zapsalis sp.	2.44	4.73	2.04		4	Larson 2008
UALVP48468	Milk River cf. Zapsalis	Milk River cf. Zapsalis sp.	3.32	5.31	1.8	7	4.5	Larson 2008
UALVP49582	Milk River cf. Zapsalis	Milk River cf. Zapsalis sp.	4.07	7.06	1.64		4.3	Larson 2008
UALVP49583	Milk River cf. Zapsalis	Milk River cf. Zapsalis sp.	4.9	8.22	2.4		4.1	Larson 2008
UALVP49584	Milk River cf. Zapsalis	Milk River cf. Zapsalis sp.	2.91	5.64	2.16		4.1	Larson 2008
UALVP49585	Milk River cf. Zapsalis	Milk River cf. Zapsalis sp.	2.74	5.31	2.28		4.7	Larson 2008
UALVP49586	Milk River cf. Zapsalis	Milk River cf. Zapsalis sp.	2.08	4.81	1.96		4.86	Larson 2008
UALVP49587	Milk River cf. Zapsalis	Milk River cf. Zapsalis sp.	2.24	4.98	1.74		5.2	Larson 2008
UALVP49588	Milk River cf. Zapsalis	Milk River cf. Zapsalis sp.	2.82	5.81	2.16		4.3	Larson 2008
UALVP49589	Milk River cf. Zapsalis	Milk River cf. Zapsalis sp.	2.99	5.23	2.28		4.8	Larson 2008
UALVP49590	Milk River cf. Zapsalis	Milk River cf. Zapsalis sp.	2.32	4.23	1.58		4.9	Larson 2008
Judith River Formation (79.5-75 Ma)
AMNH FR 3953	N/A	Zapsalis abradens*	6.5	12	3		3.03	Cope 1876
Dinosaur Park Formation (76-75 Ma)
TMP 1984.163.0080	Zapsalis abradens	Zapsalis abradens	6.1	10	2.4		3.25	Sankey et al. 2002
TMP 1980.016.0833	Zapsalis abradens	Zapsalis abradens	6.3	11	3.2		3.5	Sankey et al. 2002
TMP 1982.019.0458	Zapsalis abradens	Zapsalis abradens	5.7	12.5	2.5		3.5	Sankey et al. 2002
TMP 1982.019.0458	Zapsalis abradens	Zapsalis abradens	5.8	13	2.5		3.5	Sankey et al. 2002
TMP 1982.019.0007	Zapsalis abradens	Zapsalis abradens	7.2	15	3.2		3	Sankey et al. 2002
TMP 1985.058.0065	Zapsalis abradens	Zapsalis abradens	5.4	10.5	2.5		3.5	Sankey et al. 2002
TMP 1985.006.0002	Zapsalis abradens	Zapsalis abradens	6.5	13	3		3.25	Sankey et al. 2002
TMP 1986.077.0112	Zapsalis abradens	Zapsalis abradens	7.9	14	3.1		3.25	Sankey et al. 2002
TMP 1987.036.0005	Zapsalis abradens	Zapsalis abradens	6.6	15.5	3		3.25	Sankey et al. 2002
TMP 1989.036.0312	Zapsalis abradens	Zapsalis abradens	6.4	11.5	3.1		3.25	Sankey et al. 2002
TMP 1994.012.0268	Zapsalis abradens	Zapsalis abradens	5.8	11	2.5		3.75	Sankey et al. 2002
TMP 1997.133.0002	Zapsalis abradens	Zapsalis abradens	6.3	12	3.4		3.5	Sankey et al. 2002
TMP 1979.015.0003	Zapsalis abradens	Zapsalis abradens	6.3	15.5	3		3	Sankey et al. 2002
TMP 1984.091.0040	Zapsalis abradens	Zapsalis abradens	6	12.5	3		3.25	Sankey et al. 2002
TMP 1984.091.0040	Zapsalis abradens	Zapsalis abradens	6.4	12	3		3	Sankey et al. 2002
TMP 1985.006.0131	Zapsalis abradens	Zapsalis abradens	6.3	11.2	2.4		3.5	Sankey et al. 2002
TMP 1985.006.0133	Zapsalis abradens	Zapsalis abradens	6.4	11.7	3		3.25	Sankey et al. 2002
TMP 1986.036.0425	Zapsalis abradens	Zapsalis abradens	7	12	3		3	Sankey et al. 2002
TMP 1987.050.0008	Zapsalis abradens	Zapsalis abradens	6.8	13.7	3.3		3	Sankey et al. 2002
TMP 1989.050.0202	Zapsalis abradens	Zapsalis abradens	5.3	9.3	2.1		3.25	Sankey et al. 2002
TMP 1990.050.0208	Zapsalis abradens	Zapsalis abradens	5.8	11.5	2.6		3.5	Sankey et al. 2002
TMP 1990.053.0021	Zapsalis abradens	Zapsalis abradens	5	11	2.3		3.5	Sankey et al. 2002
TMP 1991.050.0060	Zapsalis abradens	Zapsalis abradens	6.4	14	2.5		3	Sankey et al. 2002
Judith River Formation (79.5-75 Ma)
MOR 553	Troodon formosus	Troodon formosus	4.92	7.22	2.43	3.76	2.25	Smith et al. 2005
MOR 554	Troodon formosus	Troodon formosus	6.22	9.61	2.95	2	2	Smith et al. 2005
MOR 555	Troodon formosus	Troodon formosus	6	9.39	3.03	2	1.75	Smith et al. 2005
MOR 556	Troodon formosus	Troodon formosus	5.6	8.47	2.71	2	2.5	Smith et al. 2005
MOR 557	Troodon formosus	Troodon formosus	5.2	7.84	2.33	2.5	2.5	Smith et al. 2005
MOR 558	Troodon formosus	Troodon formosus	4.45	7.25	1.62	2.5	2.5	Smith et al. 2005
Fukui 22	Troodon formosus	Troodon formosus	5.7	8.7	2.6	2.2	2.4	this study
Dinosaur Park Formation (76-75 Ma)
p849114	Dinosaur Park cf. Troodon	Troodon formosus	5.2	9		1.5	1.5	Farlow et al. 1991
p798498	Dinosaur Park cf. Troodon	Troodon formosus	5	7		1.42	1.62	Farlow et al. 1991
p841832	Dinosaur Park cf. Troodon	Troodon formosus	5.2	9		1.5	1.66	Farlow et al. 1991
p80161370	Dinosaur Park cf. Troodon	Troodon formosus	5.7	8		1.42	1.36	Farlow et al. 1991
p8219370	Dinosaur Park cf. Troodon	Troodon formosus	4.8	9		1.54	1.66	Farlow et al. 1991
p80161950	Dinosaur Park cf. Troodon	Troodon formosus	5.1	8		1.88	1.94	Farlow et al. 1991
p8561	Dinosaur Park cf. Troodon	Troodon formosus	4.3	8		1.08	1.42	Farlow et al. 1991
p7412	Dinosaur Park cf. Troodon	Troodon formosus	6.2	9	3.4	0.94	1.56	Farlow et al. 1991
p8116501	Dinosaur Park cf. Troodon	Troodon formosus	5.9	8		1.86	1.66	Farlow et al. 1991
p841685	Dinosaur Park cf. Troodon	Troodon formosus	5.6	8		2.14	1.88	Farlow et al. 1991
TMP 2000.012.0117	Dinosaur Park cf. Troodon	Troodon formosus	4.51	6.67	2.22	2.4	2.24	Longrich 2008
TMP 1996.012.0072	Dinosaur Park cf. Troodon	Troodon formosus	4.96	8.61	2.55	2	1.78	Longrich 2008
TMP 1995.012.0011	Dinosaur Park cf. Troodon	Troodon formosus	5.35	8.01	2.65		2.16	Longrich 2008
TMP 1995.021.0010	Dinosaur Park cf. Troodon	Troodon formosus	4.99	6.92	2.81	1.84	2	Longrich 2008
TMP 1989.089.0004	Dinosaur Park cf. Troodon	Troodon formosus	2.97	3.89	1.53		3.38	Longrich 2008
TMP 1987.050.0034	Dinosaur Park cf. Troodon	Troodon formosus	3.26	4.55	1.79		2.06	Longrich 2008
TMP 1986.216.0004	Dinosaur Park cf. Troodon	Troodon formosus	4.88	6.56	2.32		2.1	Longrich 2008
TMP 1987.036.0139	Dinosaur Park cf. Troodon	Troodon formosus	5.91	8.36	2.72	2.64	2.26	Longrich 2008
TMP 1989.050.0129	Dinosaur Park cf. Troodon	Troodon formosus	4.01	4.16	1.99		1.98	Longrich 2008
TMP 1986.177.0008	Dinosaur Park cf. Troodon	Troodon formosus	3.45	3.37	1.55		2.98	Longrich 2008
TMP 1985.066.0073	Dinosaur Park cf. Troodon	Troodon formosus	3.31	4.57	1.69		2.42	Longrich 2008
TMP 1989.116.0063	Dinosaur Park cf. Troodon	Troodon formosus	3.39	4.48	1.83	2.34	2.16	Longrich 2008
TMP 1984.089.0275	Dinosaur Park cf. Troodon	Troodon formosus	5.21	8.76	2.44	2.28	1.96	Longrich 2008
TMP 1986.023.0091	Dinosaur Park cf. Troodon	Troodon formosus	2.86	3.56	1.25		3.22	Longrich 2008
TMP 1986.008.0093	Dinosaur Park cf. Troodon	Troodon formosus	3.62	3.33	1.73		2.96	Longrich 2008
TMP 1986.130.0016	Dinosaur Park cf. Troodon	Troodon formosus	5.02	7.44	2.42	3.04	2.54	Longrich 2008
TMP 1983.036.0214	Dinosaur Park cf. Troodon	Troodon formosus	4.29	6.5	2.73	1.4	1.64	Longrich 2008
TMP 1985.056.0182	Dinosaur Park cf. Troodon	Troodon formosus	5.85	10.38	3.33	2.42	1.92	Longrich 2008
TMP 1985.056.0179	Dinosaur Park cf. Troodon	Troodon formosus	5.83	7.72	2.93		2.04	Longrich 2008
TMP 1986.054.0066	Dinosaur Park cf. Troodon	Troodon formosus	1.53	2.33	1.1	2.76	2.2	Longrich 2008
TMP 1994.016.0015	Dinosaur Park cf. Troodon	Troodon formosus	3.62	5.4		1.74	2.42	Longrich 2008
TMP 1987.036.0301	Dinosaur Park cf. Troodon	Troodon formosus	4.18	5.24	1.94	1.42	1.62	Longrich 2008
TMP 1987.077.0135	Dinosaur Park cf. Troodon	Troodon formosus	3.58	3.46	1.69		2.94	Longrich 2008
TMP 1995.127.0027	Dinosaur Park cf. Troodon	Troodon formosus	5.2	7.6	2.8	2	2	Park 2000
TMP 1990.034.0001	Dinosaur Park cf. Troodon	Troodon formosus	4.7	6	2	none	2.4	this study
TMP 1986.202.0005	Dinosaur Park cf. Troodon	Troodon formosus	2.5	3.1	1.3	none	4	this study
TMP 2000.019.0001	Dinosaur Park cf. Pectinodon	Dinosaur Park cf. Pectinodon sp.	2.8	5.5	1.2		2	Longrich 2008
TMP 2000.021.0001	Dinosaur Park cf. Pectinodon	Dinosaur Park cf. Pectinodon sp.	3.1	5.2	1.2		1.5	Longrich 2008
TMP 1979.008.0635	Dinosaur Park cf. Pectinodon	Dinosaur Park cf. Pectinodon sp.	2.4	3.3	0.9		2	Longrich 2008
Horseshoe Canyon Formation (68-72 Ma)
TMP 1997.044.0004	Horseshoe Canyon cf. Troodon	Horseshoe Canyon cf. Troodon sp.	5.67	7.4	3.31	1.62	2.1	Longrich 2008
TMP 1994.009.0004	Horseshoe Canyon cf. Troodon	Horseshoe Canyon cf. Troodon sp.	5.68	7.36	2.76	1.06	1.72	Longrich 2008
TMP 1987.012.0014	Horseshoe Canyon cf. Troodon	Horseshoe Canyon cf. Troodon sp.	5.25	7.83	2.79	0.94	1.28	Longrich 2008
TMP 1988.096.0007	Horseshoe Canyon cf. Troodon	Horseshoe Canyon cf. Troodon sp.	6.29	8.92	3.12	1	1.34	Longrich 2008
TMP 1998.068.0156a	Horseshoe Canyon cf. Troodon	Horseshoe Canyon cf. Troodon sp.	6.39	8.48	3.2	1.2	1.9	this study
TMP 1998.068.0156b	Horseshoe Canyon cf. Troodon	Horseshoe Canyon cf. Troodon sp.	5.81	7.64	2.96	0.75	1.4	this study
TMP 1998.068.0156c	Horseshoe Canyon cf. Troodon	Horseshoe Canyon cf. Troodon sp.	5.56	8.05	3.24	0.85	1.5	this study
TMP 1997.007.0003	Horseshoe Canyon cf. Troodon	Horseshoe Canyon cf. Troodon sp.	5.48	6.97	3.16	1.6	1.7	this study
TMP 1997.077.0004	Horseshoe Canyon cf. Troodon	Horseshoe Canyon cf. Troodon sp.	5.56	7.04	3.4	1.3	2	this study
TMP 1994.009.0004	Horseshoe Canyon cf. Troodon	Horseshoe Canyon cf. Troodon sp.	5.48	6.14	2.8	0.8	1.6	this study
TMP 1990.082.0024	Horseshoe Canyon cf. Troodon	Horseshoe Canyon cf. Troodon sp.	5.98	7.76	3.28	1.3	2	this study
TMP 1990.082.0025	Horseshoe Canyon cf. Troodon	Horseshoe Canyon cf. Troodon sp.	3.4	4.9	1.58	2.7	2.4	this study
TMP 1990.082.0026	Horseshoe Canyon cf. Troodon	Horseshoe Canyon cf. Troodon sp.	5.48	7.3	3.12	1.4	1.9	this study
TMP 1988.096.0002	Horseshoe Canyon cf. Troodon	Horseshoe Canyon cf. Troodon sp.	6.31	8.4	3.28	0.7	1.25	this study
TMP 1985.031.0019	Horseshoe Canyon cf. Troodon	Horseshoe Canyon cf. Troodon sp.	5.31	6.64	2.76	1.1	1.3	this study
TMP 1983.045.0005	Horseshoe Canyon cf. Troodon	Horseshoe Canyon cf. Troodon sp.	5.73	7.52	3.24	0.95	1.7	this study
TMP 1983.045.0006	Horseshoe Canyon cf. Troodon	Horseshoe Canyon cf. Troodon sp.	5.89	7.39	3.48	1	1.6	this study
TMP 1974.001.0002	Horseshoe Canyon cf. Troodon	Horseshoe Canyon cf. Troodon sp.	6.23	8.4	3.44	0.95	1.9	this study
TMP 1974.001.0001	Horseshoe Canyon cf. Troodon	Horseshoe Canyon cf. Troodon sp.	4.57	6.31	2.48	3	2	this study
TMP 1985.012.0002	Horseshoe Canyon cf. Troodon	Horseshoe Canyon cf. Troodon sp.	3.5	4.1	1.7	none	2.4	this study
TMP 1985.030.0032	Horseshoe Canyon cf. Troodon	Horseshoe Canyon cf. Troodon sp.	3.07	5.4	1.42	none	1.7	this study
TMP 1998.063.0043	Horseshoe Canyon cf. Troodon	Horseshoe Canyon cf. Troodon sp.	6.13	10.68	3.57	1.6	1.4	this study
TMP 1999.050.0115	Horseshoe Canyon cf. Troodon	Horseshoe Canyon cf. Troodon sp.	5.78	10.68	3.68	1	1.3	this study
TMP 1999.050.0114	Horseshoe Canyon cf. Troodon	Horseshoe Canyon cf. Troodon sp.	5.56	6.81	2.82	1.5	2	this study
TMP 2000.045.0090	Horseshoe Canyon cf. Troodon	Horseshoe Canyon cf. Troodon sp.	3.49	5.23	1.99		2.4	this study
TMP 2000.045.0024	Horseshoe Canyon cf. Troodon	Horseshoe Canyon cf. Troodon sp.	3.57	4.4	2.24		2.2	this study
TMP 2000.045.0091	Horseshoe Canyon cf. Troodon	Horseshoe Canyon cf. Troodon sp.	5.43	9.98	3.4	0.9	1.7	this study
TMP 2001.045.0080	Horseshoe Canyon cf. Troodon	Horseshoe Canyon cf. Troodon sp.	7	12.08	4.07	1.1	1.6	this study
TMP 2001.045.0081	Horseshoe Canyon cf. Troodon	Horseshoe Canyon cf. Troodon sp.	4.81	6.64	2.82	1.8	2.2	this study
TMP 2002.045.0048	Horseshoe Canyon cf. Troodon	Horseshoe Canyon cf. Troodon sp.	5.56	7.72		1.5	2	this study
TMP 2003.045.0058	Horseshoe Canyon cf. Troodon	Horseshoe Canyon cf. Troodon sp.	4.98	7.06	2.66	1.6	1.9	this study
TMP 2009.122.0001	Horseshoe Canyon cf. Troodon	Horseshoe Canyon cf. Troodon sp.	6.31	9.44	3.68	1.2	1.6	this study
TMP 1995.002.0023	Horseshoe Canyon cf. Troodon	Horseshoe Canyon cf. Troodon sp.	5.48	6.23	2.48	1.5	2.3	this study
TMP 1993.012.0013	Horseshoe Canyon cf. Troodon	Horseshoe Canyon cf. Troodon sp.	5.48	6.97	3.32	1.3	1.7	this study
TMP 1989.125.0014	Horseshoe Canyon cf. Troodon	Horseshoe Canyon cf. Troodon sp.	2.4	4.48	2	1.15	1.3	this study
TMP 1987.012.0019	Horseshoe Canyon cf. Troodon	Horseshoe Canyon cf. Troodon sp.	6.06	7.36	3.28	0.7	1.2	this study
Lance Formation (65.5-66.5 Ma)
UCMP187076	Pectinodon bakkeri	Pectinodon bakkeri	2.2	3	1		4	Sankey 2008
UCMP187075	Pectinodon bakkeri	Pectinodon bakkeri	2.7	4.5	1		3.75	Sankey 2008
UCMP187073	Pectinodon bakkeri	Pectinodon bakkeri	2.9	4.3	1.1		3.5	Sankey 2008
UCMP187074	Pectinodon bakkeri	Pectinodon bakkeri	2.7	4.2	1.1		4	Sankey 2008
UCMP187067	Pectinodon bakkeri	Pectinodon bakkeri	2.7	3.8	1		3.5	Sankey 2008
UCMP187068	Pectinodon bakkeri	Pectinodon bakkeri	2.6	3.1	1		4.5	Sankey 2008
UCMP187069	Pectinodon bakkeri	Pectinodon bakkeri	2.7	4.1	1		4	Sankey 2008
UCMP187066	Pectinodon bakkeri	Pectinodon bakkeri	3	3.5	1		3	Sankey 2008
UCMP187063	Pectinodon bakkeri	Pectinodon bakkeri	2.4	3.9	0.9		4	Sankey 2008
UCMP187065	Pectinodon bakkeri	Pectinodon bakkeri	2	4.1	1		3	Sankey 2008
UCMP187059	Pectinodon bakkeri	Pectinodon bakkeri	2.1	3.2	0.8		5	Sankey 2008
UCMP214059	Pectinodon bakkeri	Pectinodon bakkeri	1.9	3.4	1.3		3	Sankey 2008
UCMP186886	Pectinodon bakkeri	Pectinodon bakkeri	3.2	4	1		3	Sankey 2008
IMG 1675	Pectinodon bakkeri	Pectinodon bakkeri	2.78	3.83			3.14	Longrich 2008
AMNH5731 #2	Pectinodon bakkeri	Pectinodon bakkeri	2.52	4.43	1.09		1.92	Longrich 2008
AMNH5731 #1	Pectinodon bakkeri	Pectinodon bakkeri	2.44	3.93	0.91		2.02	Longrich 2008
AMNH5731 #3	Pectinodon bakkeri	Pectinodon bakkeri	2.39	4.22	1		1.98	Longrich 2008
AMNH5728.1	Pectinodon bakkeri	Pectinodon bakkeri	2.47	4.9	1.12	5.06	2.9	Longrich 2008
AMNH5728.2	Pectinodon bakkeri	Pectinodon bakkeri	2.89	4.99	1.12		3.2	Longrich 2008
AMNH5728.3	Pectinodon bakkeri	Pectinodon bakkeri	2.93	4.85	1.1	6.48	3.18	Longrich 2008
AMNH5719.1	Pectinodon bakkeri	Pectinodon bakkeri	2.74	3.88	0.96		3.06	Longrich 2008
AMNH5719.2	Pectinodon bakkeri	Pectinodon bakkeri	2.53	3.25	0.87		3.74	Longrich 2008
AMNH5719.3	Pectinodon bakkeri	Pectinodon bakkeri	2.64	3.19	0.82		3.28	Longrich 2008
AMNH5502.1	Pectinodon bakkeri	Pectinodon bakkeri	2.74	5.55	1.15		3.4	Longrich 2008
AMNH5502.2	Pectinodon bakkeri	Pectinodon bakkeri	2.63	4.8	1.18	5.94	3.38	Longrich 2008
AMNH5502.3	Pectinodon bakkeri	Pectinodon bakkeri	2.52	4.3	1.22	11.58	3.82	Longrich 2008
AMNH5733.1	Pectinodon bakkeri	Pectinodon bakkeri	2.31	4.26	0.93		2	Longrich 2008
AMNH5706.1	Pectinodon bakkeri	Pectinodon bakkeri	2.21	2.62	0.62		3.96	Longrich 2008
AMNH5706.2	Pectinodon bakkeri	Pectinodon bakkeri	2.36	2.73	0.63		4.04	Longrich 2008
AMNH5706.3	Pectinodon bakkeri	Pectinodon bakkeri	2.35	2.6	0.7		3.9	Longrich 2008
AMNH5489.1	Pectinodon bakkeri	Pectinodon bakkeri	3.12	5.63	1.46		1.56	Longrich 2008
AMNH5489.2	Pectinodon bakkeri	Pectinodon bakkeri	2.93	4.35	1.17		2.1	Longrich 2008
AMNH5489.3	Pectinodon bakkeri	Pectinodon bakkeri	2.56	4.5	1.07		1.74	Longrich 2008
AMNH5725.1	Pectinodon bakkeri	Pectinodon bakkeri	2.69	3.72	1.12		2.88	Longrich 2008
AMNH5725.2	Pectinodon bakkeri	Pectinodon bakkeri	2.51	3.1	1.05		3.74	Longrich 2008
AMNH5725.3	Pectinodon bakkeri	Pectinodon bakkeri	2.35	3.16			2.52	Longrich 2008
AMNH5722.1	Pectinodon bakkeri	Pectinodon bakkeri	2.53	3.22			3.52	Longrich 2008
AMNH5722.2	Pectinodon bakkeri	Pectinodon bakkeri	2.4	3.9		9.38	4.66	Longrich 2008
AMNH5722.3	Pectinodon bakkeri	Pectinodon bakkeri	2.33	3.56		7.8	4.42	Longrich 2008
IMG 1672	Pectinodon bakkeri	Pectinodon bakkeri	2.69	3.12			3.22	Longrich 2008
Hell Creek Formation (65.5-66.75 Ma)
UCMP186904	Hell Creek cf. Pectinodon	Pectinodon bakkeri	2	3	0.7		3.5	Sankey 2008
UCMP128845	Hell Creek cf. Pectinodon	Pectinodon bakkeri	3.2	4.6	1.1		4	Sankey 2008
UCMP128787	Hell Creek cf. Pectinodon	Pectinodon bakkeri	3.6	4.6	1.7		2.5	Sankey 2008
UCMP186868	Hell Creek cf. Pectinodon	Pectinodon bakkeri	2.2	2.9	0.9		4	Sankey 2008
UCMP186885	Hell Creek cf. Pectinodon	Pectinodon bakkeri	2.1	3	0.7		4.5	Sankey 2008
Milk River Formation (~83.5 Ma)
UALVP47985	Milk River cf. Richardoestesia gilmorei	Aquilan cf. Richardoestesia gilmorei	2.24	2.88	0.98	8	6.5	Larson 2008
UALVP47986	Milk River cf. Richardoestesia gilmorei	Aquilan cf. Richardoestesia gilmorei	2.52	4.15	1.3	7	6	Larson 2008
UALVP47997	Milk River cf. Richardoestesia gilmorei	Aquilan cf. Richardoestesia gilmorei	2.32	3.4	1.28		5.4	Larson 2008
UALVP48038	Milk River cf. Richardoestesia gilmorei	Aquilan cf. Richardoestesia gilmorei	4.15	5.81	1.64		6.5	Larson 2008
UALVP48072	Milk River cf. Richardoestesia gilmorei	Aquilan cf. Richardoestesia gilmorei	3.49	5.56	1.88		5.6	Larson 2008
UALVP48112	Milk River cf. Richardoestesia gilmorei	Aquilan cf. Richardoestesia gilmorei	3.65	5.4	1.2	10.8	5.7	Larson 2008
UALVP48115	Milk River cf. Richardoestesia gilmorei	Aquilan cf. Richardoestesia gilmorei	2.04	2.52	0.92	10	6.5	Larson 2008
UALVP48142	Milk River cf. Richardoestesia gilmorei	Aquilan cf. Richardoestesia gilmorei	1.88	3.04	0.95		9	Larson 2008
UALVP48143	Milk River cf. Richardoestesia gilmorei	Aquilan cf. Richardoestesia gilmorei	2.48	2.8	1.04		10	Larson 2008
UALVP48158	Milk River cf. Richardoestesia gilmorei	Aquilan cf. Richardoestesia gilmorei	1.88	2.12	0.88		7	Larson 2008
UALVP48182	Milk River cf. Richardoestesia gilmorei	Aquilan cf. Richardoestesia gilmorei	2.48	3.28	1.08	9	7	Larson 2008
UALVP48183	Milk River cf. Richardoestesia gilmorei	Aquilan cf. Richardoestesia gilmorei	1.6	2.96	0.98		9	Larson 2008
UALVP48188	Milk River cf. Richardoestesia gilmorei	Aquilan cf. Richardoestesia gilmorei	2.12	2.52	0.94		7	Larson 2008
UALVP48195	Milk River cf. Richardoestesia gilmorei	Aquilan cf. Richardoestesia gilmorei	1.92	2.92	1		11	Larson 2008
UALVP48196	Milk River cf. Richardoestesia gilmorei	Aquilan cf. Richardoestesia gilmorei	2.2	2.56	0.8		8.5	Larson 2008
UALVP48212	Milk River cf. Richardoestesia gilmorei	Aquilan cf. Richardoestesia gilmorei	2.82	5.06	1.48		8	Larson 2008
UALVP48213	Milk River cf. Richardoestesia gilmorei	Aquilan cf. Richardoestesia gilmorei	2.4	3.24	1.1		9	Larson 2008
UALVP48214	Milk River cf. Richardoestesia gilmorei	Aquilan cf. Richardoestesia gilmorei	2.12	3.2	1.08		6.5	Larson 2008
UALVP48216	Milk River cf. Richardoestesia gilmorei	Aquilan cf. Richardoestesia gilmorei	3.98	4.73	2.02		7	Larson 2008
UALVP48224	Milk River cf. Richardoestesia gilmorei	Aquilan cf. Richardoestesia gilmorei	1.32	1.76	0.62		9	Larson 2008
UALVP48225	Milk River cf. Richardoestesia gilmorei	Aquilan cf. Richardoestesia gilmorei	1.76	2.76	0.78		10.3	Larson 2008
UALVP48247	Milk River cf. Richardoestesia gilmorei	Aquilan cf. Richardoestesia gilmorei	3.07	4.57	1.54		6.26	Larson 2008
UALVP48250	Milk River cf. Richardoestesia gilmorei	Aquilan cf. Richardoestesia gilmorei	2.52	3.82	1.36		9	Larson 2008
UALVP48251	Milk River cf. Richardoestesia gilmorei	Aquilan cf. Richardoestesia gilmorei	2.48	3.4	1.2	8.3	7	Larson 2008
UALVP48252	Milk River cf. Richardoestesia gilmorei	Aquilan cf. Richardoestesia gilmorei	4.32	6.56	1.24	8.5	6.5	Larson 2008
UALVP48253	Milk River cf. Richardoestesia gilmorei	Aquilan cf. Richardoestesia gilmorei	1.8	2.88	0.82	10	7	Larson 2008
UALVP48259	Milk River cf. Richardoestesia gilmorei	Aquilan cf. Richardoestesia gilmorei	2	2.96	1.02		7.6	Larson 2008
UALVP48266	Milk River cf. Richardoestesia gilmorei	Aquilan cf. Richardoestesia gilmorei	2.36	3.16	1.06		6.5	Larson 2008
UALVP48275	Milk River cf. Richardoestesia gilmorei	Aquilan cf. Richardoestesia gilmorei	2.8	4.9	1.74		7.2	Larson 2008
UALVP49806	Milk River cf. Richardoestesia gilmorei	Aquilan cf. Richardoestesia gilmorei	2.08	2.68	1.16	10.5	9	Larson 2008
UALVP49807	Milk River cf. Richardoestesia gilmorei	Aquilan cf. Richardoestesia gilmorei	2.36	2.68	0.92	9.8	7	Larson 2008
UALVP49808	Milk River cf. Richardoestesia gilmorei	Aquilan cf. Richardoestesia gilmorei	2.44	2.8	0.94		6.6	Larson 2008
UALVP49809	Milk River cf. Richardoestesia gilmorei	Aquilan cf. Richardoestesia gilmorei	2.16	4.07	1.48		5.8	Larson 2008
UALVP49810	Milk River cf. Richardoestesia gilmorei	Aquilan cf. Richardoestesia gilmorei	3.15	4.32	1.84		7.5	Larson 2008
UALVP49811	Milk River cf. Richardoestesia gilmorei	Aquilan cf. Richardoestesia gilmorei	3.57	4.73	1.92	9.1	6.7	Larson 2008
UALVP49812	Milk River cf. Richardoestesia gilmorei	Aquilan cf. Richardoestesia gilmorei	2.82	4.73	1.2	9	6.4	Larson 2008
UALVP49813	Milk River cf. Richardoestesia gilmorei	Aquilan cf. Richardoestesia gilmorei	3.24	4.65	1.72		7.5	Larson 2008
UALVP49814	Milk River cf. Richardoestesia gilmorei	Aquilan cf. Richardoestesia gilmorei	2.57	3.82	1.22	8	6.7	Larson 2008
UALVP49815	Milk River cf. Richardoestesia gilmorei	Aquilan cf. Richardoestesia gilmorei	1.96	2.96	0.82		10.1	Larson 2008
UALVP49816	Milk River cf. Richardoestesia gilmorei	Aquilan cf. Richardoestesia gilmorei	3.32	6.39	1.88		7.76	Larson 2008
UALVP49817	Milk River cf. Richardoestesia gilmorei	Aquilan cf. Richardoestesia gilmorei	2.16	2.57	0.92	8.8	6.4	Larson 2008
UALVP49818	Milk River cf. Richardoestesia gilmorei	Aquilan cf. Richardoestesia gilmorei	3.65	7.3	1.78	8.2	6.2	Larson 2008
UALVP49819	Milk River cf. Richardoestesia gilmorei	Aquilan cf. Richardoestesia gilmorei	2.91	4.15	1.42	10	7.7	Larson 2008
UALVP49820	Milk River cf. Richardoestesia gilmorei	Aquilan cf. Richardoestesia gilmorei	3.15	5.56	1.84		7.2	Larson 2008
UALVP49821	Milk River cf. Richardoestesia gilmorei	Aquilan cf. Richardoestesia gilmorei	2.56	3.44	1.22		7.7	Larson 2008
UALVP49822	Milk River cf. Richardoestesia gilmorei	Aquilan cf. Richardoestesia gilmorei	2.16	3.52	0.9	10	6.5	Larson 2008
UALVP49823	Milk River cf. Richardoestesia gilmorei	Aquilan cf. Richardoestesia gilmorei	2.4	3.24	0.94	11.4	10	Larson 2008
UALVP49824	Milk River cf. Richardoestesia gilmorei	Aquilan cf. Richardoestesia gilmorei	1.92	3.04	0.81	12	9.4	Larson 2008
UALVP49825	Milk River cf. Richardoestesia gilmorei	Aquilan cf. Richardoestesia gilmorei	1.68	2.4	1		6.3	Larson 2008
UALVP49826	Milk River cf. Richardoestesia gilmorei	Aquilan cf. Richardoestesia gilmorei	2.91	4.07	1.24	9	6.9	Larson 2008
UALVP49827	Milk River cf. Richardoestesia gilmorei	Aquilan cf. Richardoestesia gilmorei	2.2	3	1.04		6.7	Larson 2008
UALVP49828	Milk River cf. Richardoestesia gilmorei	Aquilan cf. Richardoestesia gilmorei	2.08	2.68	0.96	7.8	6.3	Larson 2008
UALVP49829	Milk River cf. Richardoestesia gilmorei	Aquilan cf. Richardoestesia gilmorei	2.53	3.74	0.92		7.5	Larson 2008
UALVP49830	Milk River cf. Richardoestesia gilmorei	Aquilan cf. Richardoestesia gilmorei	2.74	4.32	1.22	10.2	7.5	Larson 2008
UALVP49831	Milk River cf. Richardoestesia gilmorei	Aquilan cf. Richardoestesia gilmorei	2.52	3	1.12		8.2	Larson 2008
UALVP49832	Milk River cf. Richardoestesia gilmorei	Aquilan cf. Richardoestesia gilmorei	2.16	3.98	1.04	10.4	6.7	Larson 2008
UALVP49833	Milk River cf. Richardoestesia gilmorei	Aquilan cf. Richardoestesia gilmorei	2.6	2.68	0.86	9.6	8.1	Larson 2008
UALVP49834	Milk River cf. Richardoestesia gilmorei	Aquilan cf. Richardoestesia gilmorei	1.83	3.49	0.9		6.7	Larson 2008
UALVP49835	Milk River cf. Richardoestesia gilmorei	Aquilan cf. Richardoestesia gilmorei	3.32	4.23	1.3	7.5	5.9	Larson 2008
UALVP49836	Milk River cf. Richardoestesia gilmorei	Aquilan cf. Richardoestesia gilmorei	3.57	6.31	1.84		5.7	Larson 2008
UALVP49837	Milk River cf. Richardoestesia gilmorei	Aquilan cf. Richardoestesia gilmorei	1.91	2.91	1.06	9.5	6.5	Larson 2008
UALVP49838	Milk River cf. Richardoestesia gilmorei	Aquilan cf. Richardoestesia gilmorei	4.07	6.56	2.28		6.3	Larson 2008
UALVP49839	Milk River cf. Richardoestesia gilmorei	Aquilan cf. Richardoestesia gilmorei	1.91	3.49	0.86	9.6	6.7	Larson 2008
UALVP49840	Milk River cf. Richardoestesia gilmorei	Aquilan cf. Richardoestesia gilmorei	2.24	3.98	1.2	8	5.5	Larson 2008
UALVP49841	Milk River cf. Richardoestesia gilmorei	Aquilan cf. Richardoestesia gilmorei	2.16	3.9	1.16		7.4	Larson 2008
UALVP49842	Milk River cf. Richardoestesia gilmorei	Aquilan cf. Richardoestesia gilmorei	3.15	3.9	1.48	6.5	6.6	Larson 2008
UALVP49843	Milk River cf. Richardoestesia gilmorei	Aquilan cf. Richardoestesia gilmorei	2.41	3.82	1	8.2	6.5	Larson 2008
UALVP49844	Milk River cf. Richardoestesia gilmorei	Aquilan cf. Richardoestesia gilmorei	2.57	3.28	1.06	7	6	Larson 2008
UALVP49845	Milk River cf. Richardoestesia gilmorei	Aquilan cf. Richardoestesia gilmorei	2.28	3.12	1	9.4	7.7	Larson 2008
UALVP49846	Milk River cf. Richardoestesia gilmorei	Aquilan cf. Richardoestesia gilmorei	2.08	2.64	0.9		9.2	Larson 2008
UALVP49847	Milk River cf. Richardoestesia gilmorei	Aquilan cf. Richardoestesia gilmorei	2.44	2.8	1	7.4	6.4	Larson 2008
UALVP49848	Milk River cf. Richardoestesia gilmorei	Aquilan cf. Richardoestesia gilmorei	2.44	3.04	1.14	7.6	6.3	Larson 2008
UALVP49849	Milk River cf. Richardoestesia gilmorei	Aquilan cf. Richardoestesia gilmorei	2.52	3.36	0.96	7.3	7.2	Larson 2008
UALVP49850	Milk River cf. Richardoestesia gilmorei	Aquilan cf. Richardoestesia gilmorei	2.16	3	0.86		8	Larson 2008
UALVP49851	Milk River cf. Richardoestesia gilmorei	Aquilan cf. Richardoestesia gilmorei	2.48	3.04	0.92		9.8	Larson 2008
UALVP49852	Milk River cf. Richardoestesia gilmorei	Aquilan cf. Richardoestesia gilmorei	2.04	2.9	0.7		9	Larson 2008
UALVP49853	Milk River cf. Richardoestesia gilmorei	Aquilan cf. Richardoestesia gilmorei	1.96	2.8	0.98		11.2	Larson 2008
UALVP49854	Milk River cf. Richardoestesia gilmorei	Aquilan cf. Richardoestesia gilmorei	2.6	2.88	1.06		9	Larson 2008
UALVP49855	Milk River cf. Richardoestesia gilmorei	Aquilan cf. Richardoestesia gilmorei	1.68	1.88	1.04		8.8	Larson 2008
UALVP49856	Milk River cf. Richardoestesia gilmorei	Aquilan cf. Richardoestesia gilmorei	1.76	2.08	0.98		8.3	Larson 2008
UALVP49857	Milk River cf. Richardoestesia gilmorei	Aquilan cf. Richardoestesia gilmorei	1.68	2.1	0.82		10.2	Larson 2008
UALVP49858	Milk River cf. Richardoestesia gilmorei	Aquilan cf. Richardoestesia gilmorei	2.41	3.98	1.26		5.5	Larson 2008
UALVP49859	Milk River cf. Richardoestesia gilmorei	Aquilan cf. Richardoestesia gilmorei	2.24	4.48	1.44		5.9	Larson 2008
UALVP49860	Milk River cf. Richardoestesia gilmorei	Aquilan cf. Richardoestesia gilmorei	2.82	3.53	1.16	8.1	6	Larson 2008
UALVP49861	Milk River cf. Richardoestesia gilmorei	Aquilan cf. Richardoestesia gilmorei	1.8	2.12	0.96		8.5	Larson 2008
UALVP49862	Milk River cf. Richardoestesia gilmorei	Aquilan cf. Richardoestesia gilmorei	2	2.12	0.78	12	9	Larson 2008
UALVP49863	Milk River cf. Richardoestesia gilmorei	Aquilan cf. Richardoestesia gilmorei	3.65	5.73	1.36		6.4	Larson 2008
UALVP49864	Milk River cf. Richardoestesia gilmorei	Aquilan cf. Richardoestesia gilmorei	2.32	2.76	1.2		8.7	Larson 2008
UALVP49865	Milk River cf. Richardoestesia gilmorei	Aquilan cf. Richardoestesia gilmorei	2.68	3.44	1.36	9	9	Larson 2008
UALVP49866	Milk River cf. Richardoestesia gilmorei	Aquilan cf. Richardoestesia gilmorei	2.24	3.15	0.96		7.8	Larson 2008
UALVP49867	Milk River cf. Richardoestesia gilmorei	Aquilan cf. Richardoestesia gilmorei	3.65	6.1	1.44	8.8	6	Larson 2008
UALVP49868	Milk River cf. Richardoestesia gilmorei	Aquilan cf. Richardoestesia gilmorei	3.4	4.48	1.6		8.1	Larson 2008
UALVP49869	Milk River cf. Richardoestesia gilmorei	Aquilan cf. Richardoestesia gilmorei	3.2	4.73	1.56		7.6	Larson 2008
UALVP49870	Milk River cf. Richardoestesia gilmorei	Aquilan cf. Richardoestesia gilmorei	3.07	4.19	1.5		7.3	Larson 2008
UALVP49871	Milk River cf. Richardoestesia gilmorei	Aquilan cf. Richardoestesia gilmorei	2.74	3.9	1.24		5.7	Larson 2008
UALVP49872	Milk River cf. Richardoestesia gilmorei	Aquilan cf. Richardoestesia gilmorei	2.82	3.9	1.28	7.5	6.2	Larson 2008
UALVP49873	Milk River cf. Richardoestesia gilmorei	Aquilan cf. Richardoestesia gilmorei	3.4	3.74	1.6		7.9	Larson 2008
UALVP49874	Milk River cf. Richardoestesia gilmorei	Aquilan cf. Richardoestesia gilmorei	3.15	3.65	1.18		7.1	Larson 2008
UALVP49875	Milk River cf. Richardoestesia gilmorei	Aquilan cf. Richardoestesia gilmorei	2.91	3.78	1.06	8.8	6.8	Larson 2008
UALVP49876	Milk River cf. Richardoestesia gilmorei	Aquilan cf. Richardoestesia gilmorei	2.41	2.99	1.08	7.2	7.1	Larson 2008
UALVP49877	Milk River cf. Richardoestesia gilmorei	Aquilan cf. Richardoestesia gilmorei	2.74	3.4	1.18		6.5	Larson 2008
UALVP49878	Milk River cf. Richardoestesia gilmorei	Aquilan cf. Richardoestesia gilmorei	2.41	2.95	0.88	10.8	6.8	Larson 2008
UALVP49879	Milk River cf. Richardoestesia gilmorei	Aquilan cf. Richardoestesia gilmorei	2.24	2.99	1	10.6	7.6	Larson 2008
UALVP49880	Milk River cf. Richardoestesia gilmorei	Aquilan cf. Richardoestesia gilmorei	2.2	2.48	1	8	7.9	Larson 2008
UALVP49881	Milk River cf. Richardoestesia gilmorei	Aquilan cf. Richardoestesia gilmorei	2	2.38	0.92		8	Larson 2008
UALVP49882	Milk River cf. Richardoestesia gilmorei	Aquilan cf. Richardoestesia gilmorei	1.92	2.44	0.8	8.4	8.7	Larson 2008
UALVP49883	Milk River cf. Richardoestesia gilmorei	Aquilan cf. Richardoestesia gilmorei	3.15	3.98	1.66		8	Larson 2008
UALVP49884	Milk River cf. Richardoestesia gilmorei	Aquilan cf. Richardoestesia gilmorei	1.88	2.32	0.84	8.7	8.2	Larson 2008
UALVP49885	Milk River cf. Richardoestesia gilmorei	Aquilan cf. Richardoestesia gilmorei	2.8	3.6	1	9	7.5	Larson 2008
UALVP49886	Milk River cf. Richardoestesia gilmorei	Aquilan cf. Richardoestesia gilmorei	1.9	2.1	1.1		8	Larson 2008
UALVP49887	Milk River cf. Richardoestesia gilmorei	Aquilan cf. Richardoestesia gilmorei	2.4	3	1		9	Larson 2008
UALVP49888	Milk River cf. Richardoestesia gilmorei	Aquilan cf. Richardoestesia gilmorei	2.4	4.2	1.4		9.5	Larson 2008
UALVP49889	Milk River cf. Richardoestesia gilmorei	Aquilan cf. Richardoestesia gilmorei	2.4	3.1	1.1	10	9	Larson 2008
UALVP49890	Milk River cf. Richardoestesia gilmorei	Aquilan cf. Richardoestesia gilmorei	2.4	3.3	1.1		10	Larson 2008
UALVP49891	Milk River cf. Richardoestesia gilmorei	Aquilan cf. Richardoestesia gilmorei	3.5	5.2	1.4	10	6	Larson 2008
UALVP49892	Milk River cf. Richardoestesia gilmorei	Aquilan cf. Richardoestesia gilmorei	2.24	3.49	0.96	8	6.5	Larson 2008
UALVP49893	Milk River cf. Richardoestesia gilmorei	Aquilan cf. Richardoestesia gilmorei	2.49	3.65	1.45		6.6	Larson 2008
UALVP49894	Milk River cf. Richardoestesia gilmorei	Aquilan cf. Richardoestesia gilmorei	3.74	4.98	2.2	8	6.25	Larson 2008
UALVP49895	Milk River cf. Richardoestesia gilmorei	Aquilan cf. Richardoestesia gilmorei	2.91	5.06	1.44		5.6	Larson 2008
UALVP49896	Milk River cf. Richardoestesia gilmorei	Aquilan cf. Richardoestesia gilmorei	2.66	3.9	1.1	10	6.6	Larson 2008
UALVP49897	Milk River cf. Richardoestesia gilmorei	Aquilan cf. Richardoestesia gilmorei	3.24	4.9	1.48		8	Larson 2008
UALVP49898	Milk River cf. Richardoestesia gilmorei	Aquilan cf. Richardoestesia gilmorei	3.4	4.48	1.52		6.8	Larson 2008
UALVP49899	Milk River cf. Richardoestesia gilmorei	Aquilan cf. Richardoestesia gilmorei	3.2	5.4	1.7		5.5	Larson 2008
UALVP49900	Milk River cf. Richardoestesia gilmorei	Aquilan cf. Richardoestesia gilmorei	3.15	4.69	1.56	12	8.5	Larson 2008
UALVP49901	Milk River cf. Richardoestesia gilmorei	Aquilan cf. Richardoestesia gilmorei	2.82	4.32	1.38		8	Larson 2008
UALVP49902	Milk River cf. Richardoestesia gilmorei	Aquilan cf. Richardoestesia gilmorei	2.86	4.98	1.46		7	Larson 2008
UALVP49903	Milk River cf. Richardoestesia gilmorei	Aquilan cf. Richardoestesia gilmorei	2.66	4.9	1.44		8	Larson 2008
UALVP49904	Milk River cf. Richardoestesia gilmorei	Aquilan cf. Richardoestesia gilmorei	3.65	4.07	1.7		8	Larson 2008
UALVP49905	Milk River cf. Richardoestesia gilmorei	Aquilan cf. Richardoestesia gilmorei	3.15	3.98	1.54		8	Larson 2008
UALVP49906	Milk River cf. Richardoestesia gilmorei	Aquilan cf. Richardoestesia gilmorei	2.99	4.48	1.52		7.3	Larson 2008
UALVP49907	Milk River cf. Richardoestesia gilmorei	Aquilan cf. Richardoestesia gilmorei	3.24	5.48	1.68		7.5	Larson 2008
UALVP49908	Milk River cf. Richardoestesia gilmorei	Aquilan cf. Richardoestesia gilmorei	2.74	3.24	1.26		8.6	Larson 2008
UALVP49909	Milk River cf. Richardoestesia gilmorei	Aquilan cf. Richardoestesia gilmorei	2.49	4.36	1.4		8.5	Larson 2008
UALVP49910	Milk River cf. Richardoestesia gilmorei	Aquilan cf. Richardoestesia gilmorei	2.91	4.9	1.76		7.5	Larson 2008
UALVP49911	Milk River cf. Richardoestesia gilmorei	Aquilan cf. Richardoestesia gilmorei	2.6	3.5	0.9	8	7	Larson 2008
UALVP49912	Milk River cf. Richardoestesia gilmorei	Aquilan cf. Richardoestesia gilmorei	2.49	3.65	1.18		7.76	Larson 2008
UALVP49913	Milk River cf. Richardoestesia gilmorei	Aquilan cf. Richardoestesia gilmorei	2.32	3.12	0.88		8.3	Larson 2008
UALVP49914	Milk River cf. Richardoestesia gilmorei	Aquilan cf. Richardoestesia gilmorei	2.08	2.7	0.96		8	Larson 2008
UALVP49915	Milk River cf. Richardoestesia gilmorei	Aquilan cf. Richardoestesia gilmorei	1.96	3.24	0.94		8	Larson 2008
UALVP49916	Milk River cf. Richardoestesia gilmorei	Aquilan cf. Richardoestesia gilmorei	2.91	4.81	2.2		6.8	Larson 2008
UALVP49917	Milk River cf. Richardoestesia gilmorei	Aquilan cf. Richardoestesia gilmorei	3.74	5.4	1.94	9	6.7	Larson 2008
UALVP49918	Milk River cf. Richardoestesia gilmorei	Aquilan cf. Richardoestesia gilmorei	3.82	4.98	1.76		6.5	Larson 2008
UALVP49919	Milk River cf. Richardoestesia gilmorei	Aquilan cf. Richardoestesia gilmorei	3.4	4.98	1.42	10.4	6.2	Larson 2008
UALVP49920	Milk River cf. Richardoestesia gilmorei	Aquilan cf. Richardoestesia gilmorei	2.99	4.73	1.58		7.2	Larson 2008
UALVP49921	Milk River cf. Richardoestesia gilmorei	Aquilan cf. Richardoestesia gilmorei	5.64	5.06	1.62		8	Larson 2008
UALVP49922	Milk River cf. Richardoestesia gilmorei	Aquilan cf. Richardoestesia gilmorei	2.95	4.32	1.46		7.3	Larson 2008
UALVP49923	Milk River cf. Richardoestesia gilmorei	Aquilan cf. Richardoestesia gilmorei	2.82	3.4	1.32		6.3	Larson 2008
UALVP49924	Milk River cf. Richardoestesia gilmorei	Aquilan cf. Richardoestesia gilmorei	3.15	4.07	1.34		7.2	Larson 2008
UALVP49925	Milk River cf. Richardoestesia gilmorei	Aquilan cf. Richardoestesia gilmorei	2.41	3.61	1.16	9.2	6.5	Larson 2008
UALVP49926	Milk River cf. Richardoestesia gilmorei	Aquilan cf. Richardoestesia gilmorei	2.76	3.4	1.14	9	7.2	Larson 2008
UALVP49927	Milk River cf. Richardoestesia gilmorei	Aquilan cf. Richardoestesia gilmorei	2.28	3	0.96	8.5	6.2	Larson 2008
UALVP49928	Milk River cf. Richardoestesia gilmorei	Aquilan cf. Richardoestesia gilmorei	2.82	3.15	1.06		6.8	Larson 2008
UALVP49929	Milk River cf. Richardoestesia gilmorei	Aquilan cf. Richardoestesia gilmorei	2.08	3.28	1.46		9	Larson 2008
UALVP49930	Milk River cf. Richardoestesia gilmorei	Aquilan cf. Richardoestesia gilmorei	2.52	3.12	0.97	8.3	7.1	Larson 2008
UALVP49931	Milk River cf. Richardoestesia gilmorei	Aquilan cf. Richardoestesia gilmorei	2.32	3.28	0.98		7.8	Larson 2008
UALVP49932	Milk River cf. Richardoestesia gilmorei	Aquilan cf. Richardoestesia gilmorei	2	2.68	0.96		7.3	Larson 2008
UALVP49933	Milk River cf. Richardoestesia gilmorei	Aquilan cf. Richardoestesia gilmorei	2.32	3.04	0.86		7.5	Larson 2008
UALVP49934	Milk River cf. Richardoestesia gilmorei	Aquilan cf. Richardoestesia gilmorei	2.4	2.8	0.81	6.4	6.8	Larson 2008
UALVP49935	Milk River cf. Richardoestesia gilmorei	Aquilan cf. Richardoestesia gilmorei	2.44	2.72	0.94		6.5	Larson 2008
UALVP49936	Milk River cf. Richardoestesia gilmorei	Aquilan cf. Richardoestesia gilmorei	2	2.8	0.84	10	7.4	Larson 2008
UALVP49937	Milk River cf. Richardoestesia gilmorei	Aquilan cf. Richardoestesia gilmorei	1.92	2.2	0.8	9	6.8	Larson 2008
UALVP49938	Milk River cf. Richardoestesia gilmorei	Aquilan cf. Richardoestesia gilmorei	1.84	2.86	0.7		6.5	Larson 2008
UALVP49939	Milk River cf. Richardoestesia gilmorei	Aquilan cf. Richardoestesia gilmorei	2.28	2.46	0.8	7.7	9	Larson 2008
UALVP49940	Milk River cf. Richardoestesia gilmorei	Aquilan cf. Richardoestesia gilmorei	2	2.28	0.94	8.8	7.4	Larson 2008
UALVP49941	Milk River cf. Richardoestesia gilmorei	Aquilan cf. Richardoestesia gilmorei	3.65	5.81	1.66	8.1	7	Larson 2008
UALVP49942	Milk River cf. Richardoestesia gilmorei	Aquilan cf. Richardoestesia gilmorei	2.82	4.32	1.56		8	Larson 2008
UALVP49943	Milk River cf. Richardoestesia gilmorei	Aquilan cf. Richardoestesia gilmorei	2.57	3.4	1.36		8.5	Larson 2008
UALVP49944	Milk River cf. Richardoestesia gilmorei	Aquilan cf. Richardoestesia gilmorei	1.88	2.16	0.9	10.8	8	Larson 2008
UALVP49945	Milk River cf. Richardoestesia gilmorei	Aquilan cf. Richardoestesia gilmorei	2.64	3	1.08		8.5	Larson 2008
UALVP49946	Milk River cf. Richardoestesia gilmorei	Aquilan cf. Richardoestesia gilmorei	1.36	2	0.72		14.6	Larson 2008
UALVP49947	Milk River cf. Richardoestesia gilmorei	Aquilan cf. Richardoestesia gilmorei	2.24	4.15	1.34		5.5	Larson 2008
UALVP49948	Milk River cf. Richardoestesia gilmorei	Aquilan cf. Richardoestesia gilmorei	2.24	3.9	1.56		5.5	Larson 2008
UALVP49949	Milk River cf. Richardoestesia gilmorei	Aquilan cf. Richardoestesia gilmorei	3.45	4.32	1.56		6	Larson 2008
UALVP49950	Milk River cf. Richardoestesia gilmorei	Aquilan cf. Richardoestesia gilmorei	2.74	3.82	1.12	7.3	5.8	Larson 2008
UALVP49951	Milk River cf. Richardoestesia gilmorei	Aquilan cf. Richardoestesia gilmorei	3.32	3.74	1.18		6.8	Larson 2008
UALVP49952	Milk River cf. Richardoestesia gilmorei	Aquilan cf. Richardoestesia gilmorei	3.15	3.74	1.16		7	Larson 2008
UALVP49953	Milk River cf. Richardoestesia gilmorei	Aquilan cf. Richardoestesia gilmorei	2.32	3.32	1.14		7.8	Larson 2008
UALVP49954	Milk River cf. Richardoestesia gilmorei	Aquilan cf. Richardoestesia gilmorei	3.82	5.69	1.34	10.2	6.1	Larson 2008
UALVP49955	Milk River cf. Richardoestesia gilmorei	Aquilan cf. Richardoestesia gilmorei	2.91	3.03	1.36		10.5	Larson 2008
UALVP49956	Milk River cf. Richardoestesia gilmorei	Aquilan cf. Richardoestesia gilmorei	2.49	4.48	1.26		5.6	Larson 2008
UALVP49957	Milk River cf. Richardoestesia gilmorei	Aquilan cf. Richardoestesia gilmorei	3.65	4.15	1.78	8	6.3	Larson 2008
UALVP49958	Milk River cf. Richardoestesia gilmorei	Aquilan cf. Richardoestesia gilmorei	1.99	2.99	0.92		8.3	Larson 2008
UALVP49959	Milk River cf. Richardoestesia gilmorei	Aquilan cf. Richardoestesia gilmorei	2.24	3.4	0.82		8	Larson 2008
UALVP48114	Milk River cf. Richardoestesia gilmorei	Aquilan cf. Richardoestesia gilmorei	2.4	5.06	1.22		5.8	Larson 2008
UALVP48140	Milk River cf. Richardoestesia gilmorei	Aquilan cf. Richardoestesia gilmorei	2.44	3.24	1.12		10.5	Larson 2008
UALVP48156	Milk River cf. Richardoestesia gilmorei	Aquilan cf. Richardoestesia gilmorei	2.56	2.88	1		7	Larson 2008
UALVP48157	Milk River cf. Richardoestesia gilmorei	Aquilan cf. Richardoestesia gilmorei	2.64	3.88	1.32		8	Larson 2008
UALVP48159	Milk River cf. Richardoestesia gilmorei	Aquilan cf. Richardoestesia gilmorei	2.4	3.6	1.2		8	Larson 2008
UALVP48194	Milk River cf. Richardoestesia gilmorei	Aquilan cf. Richardoestesia gilmorei	2.4	2.92	1.1		9	Larson 2008
UALVP48208	Milk River cf. Richardoestesia gilmorei	Aquilan cf. Richardoestesia gilmorei	4.07	10.5	2.68		6	Larson 2008
UALVP48211	Milk River cf. Richardoestesia gilmorei	Aquilan cf. Richardoestesia gilmorei	2.4	3.2	0.98		8	Larson 2008
UALVP48215	Milk River cf. Richardoestesia gilmorei	Aquilan cf. Richardoestesia gilmorei	4.48	5.89	2.24		7	Larson 2008
UALVP48217	Milk River cf. Richardoestesia gilmorei	Aquilan cf. Richardoestesia gilmorei	3.56	3.98	1.72		7	Larson 2008
UALVP48219	Milk River cf. Richardoestesia gilmorei	Aquilan cf. Richardoestesia gilmorei	3.4	3.65	1.74		7	Larson 2008
UALVP48220	Milk River cf. Richardoestesia gilmorei	Aquilan cf. Richardoestesia gilmorei	3.8	4.15	2.24	8.5	7	Larson 2008
UALVP48276	Milk River cf. Richardoestesia gilmorei	Aquilan cf. Richardoestesia gilmorei	2.44	2.76	1.12		8	Larson 2008
UALVP50010	Milk River cf. Richardoestesia gilmorei	Aquilan cf. Richardoestesia gilmorei	3.68	8.93	2.52		6.4	Larson 2008
UALVP50011	Milk River cf. Richardoestesia gilmorei	Aquilan cf. Richardoestesia gilmorei	2.91	4.57	1.48		11	Larson 2008
UALVP50012	Milk River cf. Richardoestesia gilmorei	Aquilan cf. Richardoestesia gilmorei	3.07	4.15	1.46		7.5	Larson 2008
UALVP50013	Milk River cf. Richardoestesia gilmorei	Aquilan cf. Richardoestesia gilmorei	3.03	6.89	1.42		6.3	Larson 2008
UALVP50014	Milk River cf. Richardoestesia gilmorei	Aquilan cf. Richardoestesia gilmorei	2	3.48	1.04		10.2	Larson 2008
UALVP50015	Milk River cf. Richardoestesia gilmorei	Aquilan cf. Richardoestesia gilmorei	1.48	3.12	0.96		10.2	Larson 2008
UALVP50016	Milk River cf. Richardoestesia gilmorei	Aquilan cf. Richardoestesia gilmorei	3.74	6.81	1.82		6.5	Larson 2008
UALVP50017	Milk River cf. Richardoestesia gilmorei	Aquilan cf. Richardoestesia gilmorei	2.32	4.65	1.36		5.8	Larson 2008
UALVP50018	Milk River cf. Richardoestesia gilmorei	Aquilan cf. Richardoestesia gilmorei	2.99	4.81	1.7		6	Larson 2008
UALVP50019	Milk River cf. Richardoestesia gilmorei	Aquilan cf. Richardoestesia gilmorei	1.6	2.6	0.84	10.6	10.3	Larson 2008
UALVP50020	Milk River cf. Richardoestesia gilmorei	Aquilan cf. Richardoestesia gilmorei	2.8	4.5	1.2		8	Larson 2008
UALVP50021	Milk River cf. Richardoestesia gilmorei	Aquilan cf. Richardoestesia gilmorei	2.2	4	1.6		8	Larson 2008
UALVP50022	Milk River cf. Richardoestesia gilmorei	Aquilan cf. Richardoestesia gilmorei	1.6	3.2	0.9		10	Larson 2008
UALVP50023	Milk River cf. Richardoestesia gilmorei	Aquilan cf. Richardoestesia gilmorei	2.49	4.48	1.46		5.9	Larson 2008
UALVP50024	Milk River cf. Richardoestesia gilmorei	Aquilan cf. Richardoestesia gilmorei	3.3	5.8	1.4		8	Larson 2008
UALVP50025	Milk River cf. Richardoestesia gilmorei	Aquilan cf. Richardoestesia gilmorei	1.64	2.68	0.9		8	Larson 2008
UALVP50026	Milk River cf. Richardoestesia gilmorei	Aquilan cf. Richardoestesia gilmorei	2.41	4.32	1.36		9	Larson 2008
UALVP50027	Milk River cf. Richardoestesia gilmorei	Aquilan cf. Richardoestesia gilmorei	2.24	5.23	1.26		8	Larson 2008
UALVP48210	Milk River cf. Richardoestesia gilmorei	Aquilan cf. Richardoestesia gilmorei	1.72	3.2	1.36		7.3	Larson 2008
UALVP48265	Milk River cf. Richardoestesia gilmorei	Aquilan cf. Richardoestesia gilmorei	2.4	3.72	1.84		10	Larson 2008
UALVP48277	Milk River cf. Richardoestesia gilmorei	Aquilan cf. Richardoestesia gilmorei	2.36	2.8	1.18		6	Larson 2008
UALVP50040	Milk River cf. Richardoestesia gilmorei	Aquilan cf. Richardoestesia gilmorei	2.2	5.1	1.7		11	Larson 2008
UALVP50041	Milk River cf. Richardoestesia gilmorei	Aquilan cf. Richardoestesia gilmorei	2.49	4.57	2.04	6.6	5.3	Larson 2008
UALVP50042	Milk River cf. Richardoestesia gilmorei	Aquilan cf. Richardoestesia gilmorei	3.15	5.15	1.56		5.4	Larson 2008
UALVP50043	Milk River cf. Richardoestesia gilmorei	Aquilan cf. Richardoestesia gilmorei	3.32	5.48	1.74	6.4	5.5	Larson 2008
UALVP50044	Milk River cf. Richardoestesia gilmorei	Aquilan cf. Richardoestesia gilmorei	2.99	5.15	2.32		7.5	Larson 2008
UALVP50045	Milk River cf. Richardoestesia gilmorei	Aquilan cf. Richardoestesia gilmorei	1.83	3.15	1.3		7.5	Larson 2008
UALVP50046	Milk River cf. Richardoestesia gilmorei	Aquilan cf. Richardoestesia gilmorei	3.15	5.23	1.92	9.4	7	Larson 2008
UALVP50047	Milk River cf. Richardoestesia gilmorei	Aquilan cf. Richardoestesia gilmorei	2.91	4.81	1.42		6	Larson 2008
John Henry Member of Straight Cliffs Formation (85.8-?84 Ma)
UMNH99-12805	John Henry cf. Richardoestesia gilmorei	Aquilan cf. Richardoestesia gilmorei	2.68	3.3	1.36	none	8.2	this study
UMNH424-14238	John Henry cf. Richardoestesia gilmorei	Aquilan cf. Richardoestesia gilmorei	2.31	2.79	1.15	9.5	8.2	this study
UMNH424-17370	John Henry cf. Richardoestesia gilmorei	Aquilan cf. Richardoestesia gilmorei	3.49	4.42	1.62	none	7	this study
UMNH424-17382	John Henry cf. Richardoestesia gilmorei	Aquilan cf. Richardoestesia gilmorei	3.32	5.58	1.8	none	6.4	this study
UMNH424-17220	John Henry cf. Richardoestesia gilmorei	Aquilan cf. Richardoestesia gilmorei	1.82	2.21	0.71	none	7.7	this study
UMNH424-17220	John Henry cf. Richardoestesia gilmorei	Aquilan cf. Richardoestesia gilmorei	2.05	2.38	0.75	9.2	7.6	this study
UMNH424-17220	John Henry cf. Richardoestesia gilmorei	Aquilan cf. Richardoestesia gilmorei	3.62	5.78	1.42	6.2	6.7	this study
UMNH424-17220	John Henry cf. Richardoestesia gilmorei	Aquilan cf. Richardoestesia gilmorei	3.68	6.63	2	none	6.6	this study
Oldman Formation (77-76 Ma)
TMP 1986.171.0061	Oldman cf. Richardoestesia gilmorei	Oldman cf. Richardoestesia gilmorei	1.9	3.4	0.9		8	Sankey et al. 2002
TMP 1986.171.0009	Oldman cf. Richardoestesia gilmorei	Oldman cf. Richardoestesia gilmorei	2.3	4.2	1		8	Sankey et al. 2002
TMP 1987.080.0035	Oldman cf. Richardoestesia gilmorei	Oldman cf. Richardoestesia gilmorei	3.9	7.5	3		6	Sankey et al. 2002
TMP 1996.062.0030b	Oldman cf. Richardoestesia gilmorei	Oldman cf. Richardoestesia gilmorei	1.8	3.1	0.7		7	Sankey et al. 2002
Dinosaur Park Formation (76-75 Ma)
TMP 1983.036.0233	Richardoestesia gilmorei	Richardoestesia gilmorei	4.7	12.3	2.3		5.26	Sankey et al. 2002
TMP 1983.036.0242	Richardoestesia gilmorei	Richardoestesia gilmorei	3.7	8.3	1.6		7	Sankey et al. 2002
TMP 1984.092.0268	Richardoestesia gilmorei	Richardoestesia gilmorei	3.5	5.5	1.5		7	Sankey et al. 2002
TMP 1986.023.0090	Richardoestesia gilmorei	Richardoestesia gilmorei	4	10	1.7		7	Sankey et al. 2002
TMP 1988.091.0028	Richardoestesia gilmorei	Richardoestesia gilmorei	2.9	5.3	1		7	Sankey et al. 2002
TMP 1989.076.0063	Richardoestesia gilmorei	Richardoestesia gilmorei	2.8	5.2	0.9		7	Sankey et al. 2002
TMP 1990.106.0006	Richardoestesia gilmorei	Richardoestesia gilmorei	1.7	4	0.7		9.5	Sankey et al. 2002
TMP 1995.157.0029	Richardoestesia gilmorei	Richardoestesia gilmorei	1.4	2.8	0.7		11	Sankey et al. 2002
TMP 1982.024.0078	Richardoestesia gilmorei	Richardoestesia gilmorei	3.41	4.92	1.3	7.66	6.62	Longrich 2008
TMP 1984.084.0247	Richardoestesia gilmorei	Richardoestesia gilmorei	3.14	6.13	1.5		7.04	Longrich 2008
TMP 1986.023.0105	Richardoestesia gilmorei	Richardoestesia gilmorei	2.21	4.8	1.16		9.26	Longrich 2008
TMP 1987.099.0048	Richardoestesia gilmorei	Richardoestesia gilmorei	2	5.35	0.99		9.46	Longrich 2008
TMP 1987.114.0005	Richardoestesia gilmorei	Richardoestesia gilmorei	2.83	4.43	1.08		7.82	Longrich 2008
TMP 1989.076.0083	Richardoestesia gilmorei	Richardoestesia gilmorei	2.87	3.35	1.21	8.78	7.3	Longrich 2008
TMP 1986.171.0009	Richardoestesia gilmorei	Richardoestesia gilmorei	2.11	3.75	1.16		7.36	Longrich 2008
TMP 1989.036.0355	Richardoestesia gilmorei	Richardoestesia gilmorei	3.8	10	2		7	Sankey et al. 2002
Horseshoe Canyon Formation (68-72 Ma)
TMP 1996.039.0026a	Horseshoe Canyon cf. Richardoestesia gilmorei	Horseshoe Canyon cf. Richardoestesia gilmorei	2.988	3.901	1.2	8.6	6.3	this study
TMP 1994.028.0001	Horseshoe Canyon cf. Richardoestesia gilmorei	Horseshoe Canyon cf. Richardoestesia gilmorei	5.28	10.24	2.48	8.7	5.9	this study
TMP 1990.082.0015	Horseshoe Canyon cf. Richardoestesia gilmorei	Horseshoe Canyon cf. Richardoestesia gilmorei	6.225	11.68	2.6	7.8	6.1	this study
TMP 1983.045.0011	Horseshoe Canyon cf. Richardoestesia gilmorei	Horseshoe Canyon cf. Richardoestesia gilmorei	4.98	6.557	2.2	8.2	5.6	this study
TMP 1983.033.0017	Horseshoe Canyon cf. Richardoestesia gilmorei	Horseshoe Canyon cf. Richardoestesia gilmorei	4.399	7.553	2.24	none	4.6	this study
TMP 2000.045.0080	Horseshoe Canyon cf. Richardoestesia gilmorei	Horseshoe Canyon cf. Richardoestesia gilmorei	6.97	11.9	2.66	6.2	5	this study
TMP 2002.045.0049	Horseshoe Canyon cf. Richardoestesia gilmorei	Horseshoe Canyon cf. Richardoestesia gilmorei	2.99	4.65	1.25	10	6.3	this study
TMP 2002.045.0053	Horseshoe Canyon cf. Richardoestesia gilmorei	Horseshoe Canyon cf. Richardoestesia gilmorei	3.4	4.32	1.33	10.5	6.5	this study
TMP 2001.045.0082	Horseshoe Canyon cf. Richardoestesia gilmorei	Horseshoe Canyon cf. Richardoestesia gilmorei	3.85	8.93	2.24		7.5	this study
Lance Formation (65.5-66.5 Ma)
IMG 1486	Lance cf. Richardoestesia gilmorei	Lancian cf. Richardoestesia gilmorei	2.61	4.97		8.3	7.36	Longrich 2008
IMG 1655	Lance cf. Richardoestesia gilmorei	Lancian cf. Richardoestesia gilmorei	2.08	3.62		9.82	7.66	Longrich 2008
IMG 1657	Lance cf. Richardoestesia gilmorei	Lancian cf. Richardoestesia gilmorei	2.54	4.11		10.34	7.62	Longrich 2008
IMG 1486	Lance cf. Richardoestesia gilmorei	Lancian cf. Richardoestesia gilmorei	2.57	4.19		12.28	8.08	Longrich 2008
AMNH5396.3	Lance cf. Richardoestesia gilmorei	Lancian cf. Richardoestesia gilmorei	3.5	6.3	1.53	9.38	6.42	Longrich 2008
AMNH5450	Lance cf. Richardoestesia gilmorei	Lancian cf. Richardoestesia gilmorei	2.64	6.75	1.43	13.36	11.54	Longrich 2008
AMNH5529.3	Lance cf. Richardoestesia gilmorei	Lancian cf. Richardoestesia gilmorei	3.79	5.38	1.3	7.72	5.76	Longrich 2008
AMNH5529.1	Lance cf. Richardoestesia gilmorei	Lancian cf. Richardoestesia gilmorei	3.68	5.5	1.69	8.96	5.26	Longrich 2008
AMNH5529.1a	Lance cf. Richardoestesia gilmorei	Lancian cf. Richardoestesia gilmorei	3.97	6.17	1.81	7.78	5.06	Longrich 2008
AMNH5535.3	Lance cf. Richardoestesia gilmorei	Lancian cf. Richardoestesia gilmorei	3.66	5.39	1.45	7.44	5.58	Longrich 2008
AMNH5553.3	Lance cf. Richardoestesia gilmorei	Lancian cf. Richardoestesia gilmorei	3.73	4.81	1.39	7.44	6.26	Longrich 2008
AMNH5553.1	Lance cf. Richardoestesia gilmorei	Lancian cf. Richardoestesia gilmorei	3.58	5.23	1.21	9.84	6.12	Longrich 2008
AMNH5547	Lance cf. Richardoestesia gilmorei	Lancian cf. Richardoestesia gilmorei	3.85	5.35	1.56		6.58	Longrich 2008
AMNH5547.2	Lance cf. Richardoestesia gilmorei	Lancian cf. Richardoestesia gilmorei	2.94	4.86	1.14		7.66	Longrich 2008
AMNH5547.3	Lance cf. Richardoestesia gilmorei	Lancian cf. Richardoestesia gilmorei	3.36	5.45	1.34		7.28	Longrich 2008
AMNH5545	Lance cf. Richardoestesia gilmorei	Lancian cf. Richardoestesia gilmorei	3.98	5.44			5.44	Longrich 2008
AMNH5545.2	Lance cf. Richardoestesia gilmorei	Lancian cf. Richardoestesia gilmorei	4.04	5.88			5.86	Longrich 2008
DSCN 1694	Lance cf. Richardoestesia gilmorei	Lancian cf. Richardoestesia gilmorei	3.88	8.4		10.54	6.66	Longrich 2008
AMNH5749	Lance cf. Richardoestesia gilmorei	Lancian cf. Richardoestesia gilmorei	3.61	6.37	1.55	9.2	6.26	Longrich 2008
AMNH5688 left	Lance cf. Richardoestesia gilmorei	Lancian cf. Richardoestesia gilmorei	3.75	6.97	1.53	9.36	5.7	Longrich 2008
AMNH5671.3	Lance cf. Richardoestesia gilmorei	Lancian cf. Richardoestesia gilmorei	3.89	7	1.58		5.72	Longrich 2008
AMNH1498 right	Lance cf. Richardoestesia gilmorei	Lancian cf. Richardoestesia gilmorei	3.59	5.96		9.38	6.08	Longrich 2008
Hell Creek Formation (65.5-66.75 Ma)
UCMP128941	Hell Creek cf. Richardoestesia gilmorei	Lancian cf. Richardoestesia gilmorei	3.7	6			6	Sankey 2008
UCMP120338	Hell Creek cf. Richardoestesia gilmorei	Lancian cf. Richardoestesia gilmorei	5.5	7.5			5	Sankey 2008
UCMP119921	Hell Creek cf. Richardoestesia gilmorei	Lancian cf. Richardoestesia gilmorei	3.7	5.7			6	Sankey 2008
UCMP128913	Hell Creek cf. Richardoestesia gilmorei	Lancian cf. Richardoestesia gilmorei	3.8	7			6	Sankey 2008
UCMP120153	Hell Creek cf. Richardoestesia gilmorei	Lancian cf. Richardoestesia gilmorei	3	4.8			5	Sankey 2008
UCMP120287	Hell Creek cf. Richardoestesia gilmorei	Lancian cf. Richardoestesia gilmorei	5	8			4.5	Sankey 2008
UCMP123543	Hell Creek cf. Richardoestesia gilmorei	Lancian cf. Richardoestesia gilmorei	7	6			4	Sankey 2008
UCMP123565	Hell Creek cf. Richardoestesia gilmorei	Lancian cf. Richardoestesia gilmorei	4	7			6	Sankey 2008
UCMP119718	Hell Creek cf. Richardoestesia gilmorei	Lancian cf. Richardoestesia gilmorei	6	10			5	Sankey 2008
UCMP187163	Hell Creek cf. Richardoestesia gilmorei	Lancian cf. Richardoestesia gilmorei	2.5	5			7	Sankey 2008
TMP1987.114.0005	Hell Creek cf. Richardoestesia gilmorei	Lancian cf. Richardoestesia gilmorei	2.82	4.23	1.08	none	7.6	this study
Milk River Formation (~83.5 Ma)
UALVP48279	Milk River cf. Richardoestesia isosceles	?Aquilan cf. Richardoestesia isosceles	2.4	5.11	1.12	9	7.5	Larson 2008
UALVP48287	Milk River cf. Richardoestesia isosceles	?Aquilan cf. Richardoestesia isosceles	3.82	7.72	1.58	9	6	Larson 2008
UALVP48290	Milk River cf. Richardoestesia isosceles	?Aquilan cf. Richardoestesia isosceles	4.65	11.03	2.2	7.25	7	Larson 2008
UALVP48291	Milk River cf. Richardoestesia isosceles	?Aquilan cf. Richardoestesia isosceles	4.57	11.38	2.2	8	7	Larson 2008
UALVP48295	Milk River cf. Richardoestesia isosceles	?Aquilan cf. Richardoestesia isosceles	2.36	5.15	1.2		7.5	Larson 2008
UALVP48312	Milk River cf. Richardoestesia isosceles	?Aquilan cf. Richardoestesia isosceles	3.98	11.73	2.44	8	7	Larson 2008
UALVP48323	Milk River cf. Richardoestesia isosceles	?Aquilan cf. Richardoestesia isosceles	1.92	4	1	12.5	9.5	Larson 2008
UALVP48324	Milk River cf. Richardoestesia isosceles	?Aquilan cf. Richardoestesia isosceles	3.57	10.68	1.82	6.5	7	Larson 2008
UALVP48325	Milk River cf. Richardoestesia isosceles	?Aquilan cf. Richardoestesia isosceles	4.48	13.3	2.2	8	7	Larson 2008
UALVP48326	Milk River cf. Richardoestesia isosceles	?Aquilan cf. Richardoestesia isosceles	3.32	7.8	1.7	11	8	Larson 2008
UALVP48327	Milk River cf. Richardoestesia isosceles	?Aquilan cf. Richardoestesia isosceles	5.4	14.88	2.96	7	6.5	Larson 2008
UALVP48328	Milk River cf. Richardoestesia isosceles	?Aquilan cf. Richardoestesia isosceles	2.91	6.64	1.48		10	Larson 2008
UALVP48329	Milk River cf. Richardoestesia isosceles	?Aquilan cf. Richardoestesia isosceles	4.23	10.5	2.24	7.3	6.26	Larson 2008
UALVP48330	Milk River cf. Richardoestesia isosceles	?Aquilan cf. Richardoestesia isosceles	5.78	14	2.8		6.5	Larson 2008
UALVP48331	Milk River cf. Richardoestesia isosceles	?Aquilan cf. Richardoestesia isosceles	4.81	13.13	2.32	6	5.76	Larson 2008
UALVP48343	Milk River cf. Richardoestesia isosceles	?Aquilan cf. Richardoestesia isosceles	5.89	15.58	3	7.75	6.5	Larson 2008
UALVP48344	Milk River cf. Richardoestesia isosceles	?Aquilan cf. Richardoestesia isosceles	3.2	9.45	1.84	11	8	Larson 2008
UALVP48345	Milk River cf. Richardoestesia isosceles	?Aquilan cf. Richardoestesia isosceles	1.96	4.57	1.12		9	Larson 2008
UALVP48355	Milk River cf. Richardoestesia isosceles	?Aquilan cf. Richardoestesia isosceles	2.8	9.63	1.62	10.75	10	Larson 2008
UALVP50136	Milk River cf. Richardoestesia isosceles	?Aquilan cf. Richardoestesia isosceles	2.82	7.14	1.34	10	7.6	Larson 2008
UALVP50137	Milk River cf. Richardoestesia isosceles	?Aquilan cf. Richardoestesia isosceles	2	3.4	1		10.5	Larson 2008
UALVP50138	Milk River cf. Richardoestesia isosceles	?Aquilan cf. Richardoestesia isosceles	4.55	14	2.36	13	6.2	Larson 2008
UALVP50139	Milk River cf. Richardoestesia isosceles	?Aquilan cf. Richardoestesia isosceles	2.74	7.14	1.28	7.7	7	Larson 2008
UALVP50140	Milk River cf. Richardoestesia isosceles	?Aquilan cf. Richardoestesia isosceles	2.91	5.98	1.38		11	Larson 2008
UALVP50141	Milk River cf. Richardoestesia isosceles	?Aquilan cf. Richardoestesia isosceles	1.99	4.4	0.96		10.5	Larson 2008
UALVP50142	Milk River cf. Richardoestesia isosceles	?Aquilan cf. Richardoestesia isosceles	3.15	7.47	1.46	7.7	7	Larson 2008
UALVP50143	Milk River cf. Richardoestesia isosceles	?Aquilan cf. Richardoestesia isosceles	3.24	5.4	1.4		8.4	Larson 2008
UALVP50144	Milk River cf. Richardoestesia isosceles	?Aquilan cf. Richardoestesia isosceles	1.56	2.72	0.8		14	Larson 2008
UALVP50145	Milk River cf. Richardoestesia isosceles	?Aquilan cf. Richardoestesia isosceles	3.07	8.93	1.74	9.6	8.3	Larson 2008
UALVP50146	Milk River cf. Richardoestesia isosceles	?Aquilan cf. Richardoestesia isosceles	1.83	4.07	0.78		11.5	Larson 2008
UALVP50147	Milk River cf. Richardoestesia isosceles	?Aquilan cf. Richardoestesia isosceles	2.32	3.65	1.1		10.2	Larson 2008
UALVP50148	Milk River cf. Richardoestesia isosceles	?Aquilan cf. Richardoestesia isosceles	2.82	6.39	1.04		7.7	Larson 2008
UALVP50149	Milk River cf. Richardoestesia isosceles	?Aquilan cf. Richardoestesia isosceles	2.57	4.81	1.32	8	8	Larson 2008
UALVP50150	Milk River cf. Richardoestesia isosceles	?Aquilan cf. Richardoestesia isosceles	3.7	9.5	2		8	Larson 2008
UALVP50151	Milk River cf. Richardoestesia isosceles	?Aquilan cf. Richardoestesia isosceles	3.9	9.2	1.9			Larson 2008
UALVP50152	Milk River cf. Richardoestesia isosceles	?Aquilan cf. Richardoestesia isosceles	2.41	3.82	1.08	11.3	7.7	Larson 2008
UALVP50153	Milk River cf. Richardoestesia isosceles	?Aquilan cf. Richardoestesia isosceles	2.57	5.64	1.56	12	8.9	Larson 2008
UALVP50154	Milk River cf. Richardoestesia isosceles	?Aquilan cf. Richardoestesia isosceles	5.31	13.21	2.68	9	6.5	Larson 2008
UALVP50155	Milk River cf. Richardoestesia isosceles	?Aquilan cf. Richardoestesia isosceles	3.57	9.8	1.8	8.8	7.7	Larson 2008
UALVP50156	Milk River cf. Richardoestesia isosceles	?Aquilan cf. Richardoestesia isosceles	3.49	9.45	1.92	8.6	6.3	Larson 2008
UALVP50157	Milk River cf. Richardoestesia isosceles	?Aquilan cf. Richardoestesia isosceles	2.91	6.14	1.54	10.3	8.2	Larson 2008
UALVP50158	Milk River cf. Richardoestesia isosceles	?Aquilan cf. Richardoestesia isosceles	2.12	5.56	1.34		9	Larson 2008
UALVP50159	Milk River cf. Richardoestesia isosceles	?Aquilan cf. Richardoestesia isosceles	1.72	2.72	0.94		13	Larson 2008
UALVP50160	Milk River cf. Richardoestesia isosceles	?Aquilan cf. Richardoestesia isosceles	2.04	2.44	0.9	9.2	8	Larson 2008
UALVP50161	Milk River cf. Richardoestesia isosceles	?Aquilan cf. Richardoestesia isosceles	3.57	9.28	1.96	9.8	7.4	Larson 2008
UALVP50162	Milk River cf. Richardoestesia isosceles	?Aquilan cf. Richardoestesia isosceles	2.57	6.14	1.66	12.5	8	Larson 2008
UALVP50163	Milk River cf. Richardoestesia isosceles	?Aquilan cf. Richardoestesia isosceles	2.66	7.06	1.6			Larson 2008
UALVP50164	Milk River cf. Richardoestesia isosceles	?Aquilan cf. Richardoestesia isosceles	3.4	8.75	1.82	8.5	6.5	Larson 2008
UALVP48187	Milk River cf. Richardoestesia isosceles	?Aquilan cf. Richardoestesia isosceles	2.68	2.68	0.98		8	Larson 2008
UALVP48207	Milk River cf. Richardoestesia isosceles	?Aquilan cf. Richardoestesia isosceles	3.24	7.3	1.2		7.5	Larson 2008
UALVP48218	Milk River cf. Richardoestesia isosceles	?Aquilan cf. Richardoestesia isosceles	3.98	4.48	2.16	8	6.3	Larson 2008
UALVP48222	Milk River cf. Richardoestesia isosceles	?Aquilan cf. Richardoestesia isosceles	2.44	3	1.04		10	Larson 2008
UALVP48227	Milk River cf. Richardoestesia isosceles	?Aquilan cf. Richardoestesia isosceles	2.04	2.94	0.78		8.2	Larson 2008
UALVP48228	Milk River cf. Richardoestesia isosceles	?Aquilan cf. Richardoestesia isosceles	3.57	7.14	1.84	7.25	7	Larson 2008
UALVP48229	Milk River cf. Richardoestesia isosceles	?Aquilan cf. Richardoestesia isosceles	3.08	7.14	1.76		8.26	Larson 2008
UALVP48269	Milk River cf. Richardoestesia isosceles	?Aquilan cf. Richardoestesia isosceles	2.64	7.06	1.28		7.76	Larson 2008
UALVP50199	Milk River cf. Richardoestesia isosceles	?Aquilan cf. Richardoestesia isosceles	1.79	4.4	1.04		8.7	Larson 2008
UALVP50200	Milk River cf. Richardoestesia isosceles	?Aquilan cf. Richardoestesia isosceles	1.79	4.4	0.94		9	Larson 2008
UALVP50201	Milk River cf. Richardoestesia isosceles	?Aquilan cf. Richardoestesia isosceles	2.95	6.56	1.74		7.3	Larson 2008
UALVP50202	Milk River cf. Richardoestesia isosceles	?Aquilan cf. Richardoestesia isosceles	1.99	3.98	0.96	9	8.5	Larson 2008
UALVP50203	Milk River cf. Richardoestesia isosceles	?Aquilan cf. Richardoestesia isosceles	2.41	3.98	1.08	12	9.4	Larson 2008
UALVP50204	Milk River cf. Richardoestesia isosceles	?Aquilan cf. Richardoestesia isosceles	1.6	3.36	0.9	11.2	10	Larson 2008
UALVP50205	Milk River cf. Richardoestesia isosceles	?Aquilan cf. Richardoestesia isosceles	2.16	3.6	0.98		8	Larson 2008
UALVP50206	Milk River cf. Richardoestesia isosceles	?Aquilan cf. Richardoestesia isosceles	2.24	3.74	0.94	9.5	9	Larson 2008
UALVP50207	Milk River cf. Richardoestesia isosceles	?Aquilan cf. Richardoestesia isosceles	1.92	3.28	0.9		10.7	Larson 2008
UALVP50208	Milk River cf. Richardoestesia isosceles	?Aquilan cf. Richardoestesia isosceles	3.9	9.89	2.08	7.7	9.2	Larson 2008
UALVP50209	Milk River cf. Richardoestesia isosceles	?Aquilan cf. Richardoestesia isosceles	2.4	3	1		11.3	Larson 2008
John Henry Member of Straight Cliffs Formation (85.8-?84 Ma)
UMNH424-17371	John Henry cf. Richardoestesia isosceles	Aquilan cf. Richardoestesia isosceles	3.1	8.27	1.62	11.3	8.1	this study
UMNH424-14403	John Henry cf. Richardoestesia isosceles	Aquilan cf. Richardoestesia isosceles	1.88	5.01	1.12		10.8	this study
UMNH424-17220	John Henry cf. Richardoestesia isosceles	Aquilan cf. Richardoestesia isosceles	2.47	6.18	1.39	10.9		this study
UMNH424-17220	John Henry cf. Richardoestesia isosceles	Aquilan cf. Richardoestesia isosceles	2.5	5.53	1.35		11	this study
Oldman Formation (77-76 Ma)
TMP 1986.159.0062	Oldman cf. Richardoestesia isosceles	Richardoestesia isosceles	3.5	7.5	1.5		6.5	Sankey et al. 2002
TMP 1990.079.0031	Oldman cf. Richardoestesia isosceles	Richardoestesia isosceles	2.8	6.8	1.3		8	Sankey et al. 2002
TMP 1995.177.0049a	Oldman cf. Richardoestesia isosceles	Richardoestesia isosceles	3.2	8.5	1.2		10	Sankey et al. 2002
TMP 1995.180.0005a	Oldman cf. Richardoestesia isosceles	Richardoestesia isosceles	1.9	5.2	0.9		12	Sankey et al. 2002
TMP 1995.180.0005b	Oldman cf. Richardoestesia isosceles	Richardoestesia isosceles	1.7	4.2	0.9		0	Sankey et al. 2002
TMP 1996.048.0011	Oldman cf. Richardoestesia isosceles	Richardoestesia isosceles	2.5	5	1.3		8	Sankey et al. 2002
TMP 1996.062.0030a	Oldman cf. Richardoestesia isosceles	Richardoestesia isosceles	3.6	12.5	1.7		6	Sankey et al. 2002
TMP 1989.103.0025	Oldman cf. Richardoestesia isosceles	Richardoestesia isosceles	3.9	5.4	2.5		7.5	Sankey et al. 2002
TMP 1995.177.0079	Oldman cf. Richardoestesia isosceles	Richardoestesia isosceles	1.9	3	0.7		12	Sankey et al. 2002
TMP 1986.172.0053	Oldman cf. Richardoestesia isosceles	Richardoestesia isosceles	1.9	2.9	0.7		12	Sankey et al. 2002
Dinosaur Park Formation (76-75 Ma)
TMP 1984.001.0012	Dinosaur Park cf. Richardoestesia isosceles	Richardoestesia isosceles	4.5	11	2.1		6	Sankey et al. 2002
TMP 1986.023.0105	Dinosaur Park cf. Richardoestesia isosceles	Richardoestesia isosceles	2.3	5.8	1.1		8.5	Sankey et al. 2002
TMP 1986.033.0054	Dinosaur Park cf. Richardoestesia isosceles	Richardoestesia isosceles	2.1	4.5	1.1		8	Sankey et al. 2002
TMP 1986.045.0046	Dinosaur Park cf. Richardoestesia isosceles	Richardoestesia isosceles	2.3	5.5	1.2		10	Sankey et al. 2002
TMP 1988.036.0199	Dinosaur Park cf. Richardoestesia isosceles	Richardoestesia isosceles	3.7	9.5	1.7		7	Sankey et al. 2002
TMP 1995.181.0010	Dinosaur Park cf. Richardoestesia isosceles	Richardoestesia isosceles	3	7.2	1.6		7	Sankey et al. 2002
TMP 1996.142.0019	Dinosaur Park cf. Richardoestesia isosceles	Richardoestesia isosceles	3.1	9.7	1.5		7	Sankey et al. 2002
TMP 1987.158.0076	Dinosaur Park cf. Richardoestesia isosceles	Richardoestesia isosceles	2.4	3.3	0.8		10	Sankey et al. 2002
TMP 1984.092.0205	Dinosaur Park cf. Richardoestesia isosceles	Richardoestesia isosceles	2	2.7	0.7		12	Sankey et al. 2002
TMP 1986.021.0068	Dinosaur Park cf. Richardoestesia isosceles	Richardoestesia isosceles	2	3.7	1		12	Sankey et al. 2002
TMP 1995.174.0052	Dinosaur Park cf. Richardoestesia isosceles	Richardoestesia isosceles	1.8	2.3	0.7		12	Sankey et al. 2002
TMP 1995.181.0010c	Dinosaur Park cf. Richardoestesia isosceles	Richardoestesia isosceles	2.2	3.3	0.8		12	Sankey et al. 2002
TMP 1995.181.0060e	Dinosaur Park cf. Richardoestesia isosceles	Richardoestesia isosceles	1.4	2.4	0.6		12	Sankey et al. 2002
TMP 1995.181.0060f	Dinosaur Park cf. Richardoestesia isosceles	Richardoestesia isosceles	1.9	2.5	0.7		12	Sankey et al. 2002
BB86 uncat.	Dinosaur Park cf. Richardoestesia isosceles	Richardoestesia isosceles	3	6			9	Farlow et al. 1991
p741067no1	Dinosaur Park cf. Richardoestesia isosceles	Richardoestesia isosceles	2.3	5		8	4.8	Farlow et al. 1991
p741067no2	Dinosaur Park cf. Richardoestesia isosceles	Richardoestesia isosceles	3	6			4.5	Farlow et al. 1991
p741067no3	Dinosaur Park cf. Richardoestesia isosceles	Richardoestesia isosceles	3.3	5		7	4	Farlow et al. 1991
p83331	Dinosaur Park cf. Richardoestesia isosceles	Richardoestesia isosceles	4.8	7			4.6	Farlow et al. 1991
p8219366	Dinosaur Park cf. Richardoestesia isosceles	Richardoestesia isosceles	3.1	6	1.8		4.4	Farlow et al. 1991
p83368no3	Dinosaur Park cf. Richardoestesia isosceles	Richardoestesia isosceles	3.6	7			7	Farlow et al. 1991
p663182	Dinosaur Park cf. Richardoestesia isosceles	Richardoestesia isosceles	3.8	7			4	Farlow et al. 1991
nmckno23b	Dinosaur Park cf. Richardoestesia isosceles	Richardoestesia isosceles	5.9	10			4	Farlow et al. 1991
hjohnson4	Dinosaur Park cf. Richardoestesia isosceles	Richardoestesia isosceles	2	4			5	Farlow et al. 1991
Aguja Middle Campanian (~79 Ma)
LSUMG489:6237	Richardoestesia isosceles	Richardoestesia isosceles	2	2.5	0.9		10	Sankey et al. 2005
LSUMG489:6235	Richardoestesia isosceles	Richardoestesia isosceles	1.7	3	0.7		11	Sankey et al. 2005
LSUMG489:6050	Richardoestesia isosceles	Richardoestesia isosceles	1.7	3.5	1		10	Sankey et al. 2005
LSUMG741:5933	Richardoestesia isosceles	Richardoestesia isosceles	1.8	2.3	0.9		9	Sankey et al. 2005
LSUMG113:5939	Richardoestesia isosceles	Richardoestesia isosceles	2	4	1		12	Sankey et al. 2005
Lance Formation (65.5-66.5 Ma)
UCMP213984	Lance cf. Richardoestesia isosceles	Lancian cf. Richardoestesia isosceles	4.4	8.6	1.8		6.5	Sankey 2008
UCMP214012	Lance cf. Richardoestesia isosceles	Lancian cf. Richardoestesia isosceles	3.8	7.3	1.8		6.5	Sankey 2008
UCMP187102	Lance cf. Richardoestesia isosceles	Lancian cf. Richardoestesia isosceles	2.5	5.2	1.8		8.5	Sankey 2008
UCMP214013	Lance cf. Richardoestesia isosceles	Lancian cf. Richardoestesia isosceles	2.5	5.4	1.4		8.5	Sankey 2008
UCMP214016	Lance cf. Richardoestesia isosceles	Lancian cf. Richardoestesia isosceles	2.7	3.9	1.2		9	Sankey 2008
UCMP214020	Lance cf. Richardoestesia isosceles	Lancian cf. Richardoestesia isosceles	2.7	5	1.4		12	Sankey 2008
UCMP214021	Lance cf. Richardoestesia isosceles	Lancian cf. Richardoestesia isosceles	2.9	5.4	1.4		10	Sankey 2008
UCMP214022	Lance cf. Richardoestesia isosceles	Lancian cf. Richardoestesia isosceles	3.5	7.2	1.5		8	Sankey 2008
UCMP214023	Lance cf. Richardoestesia isosceles	Lancian cf. Richardoestesia isosceles	3.2	6.3	1.4		8	Sankey 2008
UCMP214035	Lance cf. Richardoestesia isosceles	Lancian cf. Richardoestesia isosceles	2.2	4	1		9	Sankey 2008
UCMP214039	Lance cf. Richardoestesia isosceles	Lancian cf. Richardoestesia isosceles	2.8	6.5	1.6		6.5	Sankey 2008
UCMP214043	Lance cf. Richardoestesia isosceles	Lancian cf. Richardoestesia isosceles	3.2	7.3	1.6		8	Sankey 2008
	Lance cf. Richardoestesia isosceles	Lancian cf. Richardoestesia isosceles	4.1	12		7	6.5	Farlow et al. 1991
AMNH5366	Lance cf. Richardoestesia isosceles	Lancian cf. Richardoestesia isosceles	4.75	12.36	2.18	7.98	7.08	Longrich 2008
AMNH5370	Lance cf. Richardoestesia isosceles	Lancian cf. Richardoestesia isosceles	4.35	13.5	2.21	7.62	6.32	Longrich 2008
AMNH5370.2	Lance cf. Richardoestesia isosceles	Lancian cf. Richardoestesia isosceles	4.02	13.71	2.12	8.74	6.46	Longrich 2008
AMNH5376.1	Lance cf. Richardoestesia isosceles	Lancian cf. Richardoestesia isosceles	4.98	16.38	2.26	8.3	6.76	Longrich 2008
AMNH5376.2	Lance cf. Richardoestesia isosceles	Lancian cf. Richardoestesia isosceles	4.4	13.86	2.09	7.96	7.34	Longrich 2008
AMNH5380.1	Lance cf. Richardoestesia isosceles	Lancian cf. Richardoestesia isosceles	4.74	15.1	2.29	7.7	6.72	Longrich 2008
AMNH5380.2	Lance cf. Richardoestesia isosceles	Lancian cf. Richardoestesia isosceles	3.85	13.63	2.04	7.04	6.36	Longrich 2008
AMNH5382.1	Lance cf. Richardoestesia isosceles	Lancian cf. Richardoestesia isosceles	5.55	17.2	2.39	7.94	6.02	Longrich 2008
AMNH5382.2	Lance cf. Richardoestesia isosceles	Lancian cf. Richardoestesia isosceles	5.74	16.65	2.53	7.56	6.3	Longrich 2008
AMNH5386.3	Lance cf. Richardoestesia isosceles	Lancian cf. Richardoestesia isosceles	4.24	9.46	1.96	9.3	6.2	Longrich 2008
AMNH5386.2	Lance cf. Richardoestesia isosceles	Lancian cf. Richardoestesia isosceles	3.46	11.26	1.83		7.64	Longrich 2008
AMNH5386.2	Lance cf. Richardoestesia isosceles	Lancian cf. Richardoestesia isosceles	4.31	14.37	2.11	7.08	6.28	Longrich 2008
AMNH5390.2	Lance cf. Richardoestesia isosceles	Lancian cf. Richardoestesia isosceles	4.22	9.04		9.16	6.84	Longrich 2008
AMNH5390.3	Lance cf. Richardoestesia isosceles	Lancian cf. Richardoestesia isosceles	3.35	9.57		14.24	10.44	Longrich 2008
AMNH5390.1	Lance cf. Richardoestesia isosceles	Lancian cf. Richardoestesia isosceles	2.85	5.5		9.16	6.18	Longrich 2008
AMNH5556.1	Lance cf. Richardoestesia isosceles	Lancian cf. Richardoestesia isosceles	5.57	17.13		7.94	6.82	Longrich 2008
AMNH5556.2	Lance cf. Richardoestesia isosceles	Lancian cf. Richardoestesia isosceles	5.8	16.8		7.78	5.76	Longrich 2008
Hell Creek Formation (65.5-66.75 Ma)
UCMP186837	Hell Creek cf. Richardoestesia isosceles	Lancian cf. Richardoestesia isosceles	3.3	6.7	1.7		10.5	Sankey 2008
UCMP186842	Hell Creek cf. Richardoestesia isosceles	Lancian cf. Richardoestesia isosceles	2.7	5.3	1.4		8	Sankey 2008
UCMP186825	Hell Creek cf. Richardoestesia isosceles	Lancian cf. Richardoestesia isosceles	3.3	9.1	1.8		8	Sankey 2008
UCMP213927	Hell Creek cf. Richardoestesia isosceles	Lancian cf. Richardoestesia isosceles	3.2	6.2	1.5		6.5	Sankey 2008
UCMP213933	Hell Creek cf. Richardoestesia isosceles	Lancian cf. Richardoestesia isosceles	3	4.8	1.5		8	Sankey 2008
UCMP213935	Hell Creek cf. Richardoestesia isosceles	Lancian cf. Richardoestesia isosceles	2.3	4.4	1.4		8	Sankey 2008
UCMP213951	Hell Creek cf. Richardoestesia isosceles	Lancian cf. Richardoestesia isosceles	4.2	13	1.8		8	Sankey 2008
UCMP213953	Hell Creek cf. Richardoestesia isosceles	Lancian cf. Richardoestesia isosceles	3.8	8.9	1.7		7.5	Sankey 2008
UCMP213960	Hell Creek cf. Richardoestesia isosceles	Lancian cf. Richardoestesia isosceles	3.9	9.1	1.8		7.5	Sankey 2008
UCMP213972	Hell Creek cf. Richardoestesia isosceles	Lancian cf. Richardoestesia isosceles	4.1	8.5	2		8	Sankey 2008
UCMP213975	Hell Creek cf. Richardoestesia isosceles	Lancian cf. Richardoestesia isosceles	4.4	8.9	2		7	Sankey 2008
UCMP213994	Hell Creek cf. Richardoestesia isosceles	Lancian cf. Richardoestesia isosceles	2.9	5.8	1.4		10	Sankey 2008
UCMP213995	Hell Creek cf. Richardoestesia isosceles	Lancian cf. Richardoestesia isosceles	3.5	8.6	1.8		5.5	Sankey 2008
UCMP213997	Hell Creek cf. Richardoestesia isosceles	Lancian cf. Richardoestesia isosceles	2.9	5.9	1.5		10	Sankey 2008
UCMP186842	Hell Creek cf. Richardoestesia isosceles	Lancian cf. Richardoestesia isosceles	2.7	5.9	1.4		9	Sankey 2008
UCMP123525	Hell Creek cf. Richardoestesia isosceles	Lancian cf. Richardoestesia isosceles	3.9	7.3	1.5		10	Sankey 2008
UCMP186840	Hell Creek cf. Richardoestesia isosceles	Lancian cf. Richardoestesia isosceles	4.4	9.2	2		6.5	Sankey 2008
UCMP213980	Hell Creek cf. Richardoestesia isosceles	Lancian cf. Richardoestesia isosceles	2.7	5.2	1.4		6.5	Sankey 2008
Hosta Tongue, Point Lookout Sandstone
NMMNH P-27481		cf Dromaeosauridae Morphotype A	5.21	8.77	2.65	6	5
Allison Member, Menefee Formation
NMMNH P-25054		Dromaeosauridae morphotype A	3.01	1.38		0	5
Fossil Forest Member, Fruitland Formation
NMMNH P-26240		Dromaeosauridae morphotype A					18
NMMNH P-27486		Dromaeosauridae morphotype A					5
NMMNH P-27487		Dromaeosauridae morphotype A	2.67		1.28	0	4
NMMNH P-27559		Dromaeosauridae morphotype A	5.46	8.57	2.45	8	5
NMMNH P-30001		Dromaeosauridae morphotype A	3.95	7.1	2.07	0	4
NMMNH P-30002		Dromaeosauridae morphotype A	3.42		1.6	0	4
NMMNH P-30003		Dromaeosauridae morphotype A	2.88	3.83	1.41	0	4
NMMNH P-30330		Dromaeosauridae morphotype A	3.03	3.64	1.18	0	6
NMMNH P-38027		Dromaeosauridae morphotype A	4.48		2.21		7
NMMNH P-38425		Dromaeosauridae morphotype A	2.5		1.04	0	5.5
NMMNH P-38431		Dromaeosauridae morphotype A					5
NMMNH P-38432		Dromaeosauridae morphotype A				6	4.6
NMMNH P-49808		Dromaeosauridae morphotype A	5.8		2.5	5.5	4.5
NMMNH P-66896		Dromaeosauridae morphotype A	4.27	9.07	2.25	7	4.5
Hunter Wash Member, Kirtland Formation
NMMNH P-07189		cf. Dromaeosauridae morphotype A		8.29	3.11	5	5
NMMNH P-30220		Dromaeosauridae morphotype A			0.54
NMMNH P-30222		Dromaeosauridae morphotype A					3.5
NMMNH P-30223		Dromaeosauridae morphotype A	4.08		2.2		6
NMMNH P-30225		Dromaeosauridae morphotype A	4.01		2.01
NMMNH P-30226		Dromaeosauridae morphotype A				4.5	3.5
NMMNH P-30227		Dromaeosauridae morphotype A	2.58		1.21	7	5
NMMNH P-30228		Dromaeosauridae morphotype A	3.65		1.69
NMMNH P-30229		Dromaeosauridae morphotype A	3.27		1.47
NMMNH P-30230		Dromaeosauridae morphotype A				0	6
NMMNH P-30231		Dromaeosauridae morphotype A					4
NMMNH P-30232		Dromaeosauridae morphotype A	4.67		2.3	5	4
NMMNH P-32831		Dromaeosauridae morphotype A	4.3				4.5
NMMNH P-33144		Dromaeosauridae morphotype A	4.28		1.97	0	4.5
NMMNH P-33145		Dromaeosauridae morphotype A	3.05		1.46	6	4
NMMNH P-33146		Dromaeosauridae morphotype A	4.11		1.74		6
NMMNH P-33149		Dromaeosauridae morphotype A				7	4
NMMNH P-33473		Dromaeosauridae morphotype A	3.22	6.51	1.66		5
NMMNH P-33474		Dromaeosauridae morphotype A				6	5
NMMNH P-33475		Dromaeosauridae morphotype A	4.59		2.06	0	5
NMMNH P-33476		Dromaeosauridae morphotype A	2.52	3.21	1.12	0	5
NMMNH P-33477		Dromaeosauridae morphotype A			1.36
NMMNH P-33484		Dromaeosauridae morphotype A	3.76		1.77
NMMNH P-33485		Dromaeosauridae morphotype A				7	4
NMMNH P-33486		Dromaeosauridae morphotype A	5.05	6.66	2.61		6
NMMNH P-33487		Dromaeosauridae morphotype A				8	4.5
De-na-zin Member, Kirtland Formation
NMMNH P-22578		Dromaeosauridae morphotype A	4.38	8.37	1.88	7	5.5
NMMNH P-26201		Dromaeosauridae morphotype A				5	4
NMMNH P-26205		Dromaeosauridae morphotype A	4.94	8.65	2.23	6.5	3.5
NMMNH P-32752		Dromaeosauridae morphotype A	4.43	8.92	2.4	4.5	3.5
NMMNH P-68395		Dromaeosauridae morphotype A	3.65	4.15	2.1	6	3.5
Naashoibito Member, Kirtland Formation
NMMNH P-32814		Dromaeosauridae morphotype A	3.33	5.2	1.56	9	5
Hunter Wash Member, Kirtland Formation
NMMNH P-33489		Dromaeosauridae morphotype B					3.5
NMMNH P-33148		Dromaeosauridae morphotype B	3.8	6.48	2.53	3	3
Fossil Forest Member, Fruitland Formation
NMMNH P-27489		cf. Richardoestesia sp.					8
NMMNH P-28379		cf. Richardoestesia sp.				0	8
NMMNH P-30277		cf. Richardoestesia sp.
NMMNH P-30329		cf. Richardoestesia sp.
NMMNH P-36552		cf. Richardoestesia sp.				0
NMMNH P-38410		cf. Richardoestesia sp.	1.45		0.7	0	12.5
NMMNH P-38428		cf. Richardoestesia sp.				0	9
NMMNH P-52501		cf. Richardoestesia sp.			1.62	0	7
NMMNH P-52503		cf. Richardoestesia sp.	0.99	1.47	0.19	0	12
NMMNH P-52514		cf. Richardoestesia sp.	0.87			0	11
NMMNH P-27495		cf. Richardoestesia gilmorei	3.9*		1.71	0	7
NMMNH P-30004		cf. Richardoestesia gilmorei	3.34	4.13	1.42	0	8
NMMNH P-30005		cf. Richardoestesia gilmorei	3.36		1.33	0	7
NMMNH P-30331		cf. Richardoestesia gilmorei	3.36		1.62	0	9
NMMNH P-27488		cf. Richardoestesia isosceles				0	7
NMMNH P-27496		cf. Richardoestesia isosceles	3.69		1.64	0	8
Hunter Wash Member, Kirtland Formation
NMMNH P-30208		cf. Richardoestesia sp.	2.87	5	1.4	0	9
NMMNH P-33478		cf. Richardoestesia sp.
NMMNH P-33479		cf. Richardoestesia sp.	1.89		1.05
NMMNH P-30209		cf. Richardoestesia gilmorei	2.24		0.81	0	7
NMMNH P-30219		cf. Richardoestesia gilmorei				9.5	6
NMMNH P-30221		cf. Richardoestesia gilmorei
NMMNH P-33482		cf. Richardoestesia gilmorei	2.94	4.51	1.19	15	7
NMMNH P-30207		cf. Richardoestesia isosceles				13	9
NMMNH P-30224		cf. Richardoestesia isosceles				0	8
NMMNH P-33480		cf. Richardoestesia isosceles				0	7
NMMNH P-33481		cf. Richardoestesia isosceles				12	8
NMMNH P-33483		cf. Richardoestesia isosceles				0	7
De-na-zin Member, Kirtland Formation
NMMNH P-32753		cf. Richardoestesia isosceles	3.24		1.5	9	7
Naashoibito Member, Kirtland Formation
NMMNH P-22567		cf. Richardoestesia	2.82		1.4
NMMNH P-37793		cf. Richardoestesia sp.	2.28		0.99		8
NMMNH P-32742		cf. Richardoestesia isosceles	2.01		1.21	0	13
NMMNH P-46389		cf. Richardoestesia isosceles	2.82		1.21	6	6
De-na-zin Member, Kirtland Formation
NMMNH P-68396		Troodontidae gen. et sp. Indet.	5.5	4.78	2.85	3.5	1.75
Naashoibito Member, Kirtland Formation
NMMNH P-32746		cf. Troodontidae				2.5
NMMNH P-22566		Troodontidae gen. et sp. Indet.	5.34	6.83	2.61	0	2
NMMNH P-32772		Troodontidae gen. et sp. Indet.	6.04	8.38	3.27		2
NMMNH P-32746		cf. Troodontidae				2.5
NMMNH P-32784		Troodontidae gen. et sp. Indet.				3	3
NMMNH P-33520		Troodontidae gen. et sp. Indet.			3.06		2
NMMNH P-33521		Troodontidae gen. et sp. Indet.	3.26	3.91	1.85	0	2.5
NMMNH P-33901		Troodontidae gen. et sp. Indet.					1.5
NOTE: Dataset is that of Larson and Currie (2013) with the New Mexico specimens added by TEW.

## Sheet: Reduced Data for PCA
Specimennumber	FABL	CH	BW	ADM	PDM
UALVP47980	4.15	5.06	1.64	7	4.75
UALVP47981	4.23	5.98	1.72	13	6
UALVP47983	4.57	6.56	1.83	10	5
UALVP47987	2.08	2.32	1	9	6
UALVP48029	3.74	5.89	1.72	8	5
UALVP48030	4.15	6.39	1.76	7	4
UALVP48031	1.84	2.2	0.84	11	6
UALVP48037	3.49	5.48	1.76	9.5	6
UALVP48044	2.49	4.81	1.28	9	5
UALVP48046	3.15	5.4	1.44	7	5.75
UALVP48047	2.64	3.4	1.16	8	5
UALVP48053	3.4	4.98	1.48	8	5
UALVP48054	2.74	4.4	1.1	8.2	6.3
UALVP48059	2.4	3.4	1.26	8.5	5.25
UALVP48061	4.32	6.47	1.66	6.3	4.5
UALVP48063	3.15	3.98	1.3	9.5	5.5
UALVP48064	4.07	7.22	1.62	6.5	5
UALVP48065	3.57	4.48	1.52	8	5
UALVP48066	4.4	6.89	1.68	11	5.5
UALVP48067	3.9	5.48	1.76	10	5
UALVP48068	4.23	4.48	1.88	8	4.3
UALVP48070	2.72	3.72	1.1	8.6	5.25
UALVP48073	2.74	5.06	1.12	10	6.5
UALVP48074	2.91	4.9	1.12	8	5.75
UALVP48075	3.08	3.24	1.24	7.6	4.6
UALVP48076	2.44	3.6	1.12	9	6.5
UALVP48077	3.12	3.76	1.18	9	6
UALVP48078	2.8	3.12	1.32	10	5.5
UALVP48080	2.4	2.68	1.18	0	5.7
UALVP48082	3.07	5.15	1.56	10	5.25
UALVP48095	2.84	3.32	1.42	6.6	5
UALVP48118	4.81	7.47	1.82	7	5
UALVP48126	3.57	6.06	1.86	?	5.5
UALVP48127	3.9	5.81	1.68	?	4.75
UALVP48128	3.24	4.15	1.24	9	5
UALVP48129	2.4	3.4	1.02	8.5	5.6
UALVP48135	1.76	2	0.84	11	6
UALVP48137	2.36	3.16	1.06	?	7
UALVP48221	2.08	2.52	0.88	10	8
UALVP48223	2	2.72	0.86	8	8
UALVP48249	1.64	2.28	0.8	10	8
UALVP48466	3.98	6.64	2.12	5.2	4.3
UALVP48478	2.28	2.64	1.16	6.8	4.5
UALVP50475	2.36	2.52	1.1	8	5.7
UALVP50476	2.66	4.15	1.12	8.2	6.2
UALVP50477	2.16	3.57	1.14	?	6.2
UALVP50478	2.91	3.82	1.32	?	5.6
UALVP50479	2.57	3.82	1.2	9	7.2
UALVP50480	2.16	4.23	1.02	?	6.6
UALVP50481	3.74	5.56	1.52	8.2	5.5
UALVP50482	3.07	5.06	1.44	9	6
UALVP50483	4.15	7.3	1.76	6.5	4.8
UALVP50484	2.83	3.4	1.12	9	6.2
UALVP50485	3.11	4.48	1.32	6.6	5.1
UALVP50486	2.91	3.9	1.36	7	5
UALVP50487	2.24	2.49	0.96	10	6.5
UALVP50488	2.57	4.07	1.3	8.8	5.9
UALVP50489	3.07	4.73	1.42	8.8	5.2
UALVP50490	4.32	5.81	1.9	6.5	4.4
UALVP50491	3.24	5.06	1.28	10.3	5.4
UALVP50492	3.4	4.9	1.58	8	5.3
UALVP50493	2.49	4.77	1.26	?	6
UALVP50494	2.91	5.23	1.46	11.5	5.9
UALVP50495	2.74	4.57	1.26	10.6	5.3
UALVP50496	4.32	6.47	1.44	8.1	5.4
UALVP50497	3.74	5.23	1.76	8	5.4
UALVP50498	2.91	3.4	1.24	8.5	5.1
UALVP50499	4.15	6.31	1.8	7.4	4.9
UALVP50500	3.57	6.23	1.6	10.6	4.7
UALVP50501	2.32	3.49	1.16	9	6
UALVP50502	2.36	2.76	0.94	9.7	5.8
UALVP50503	3.9	7.22	1.6	?	5.2
UALVP50504	3.4	4.98	1.4	9.2	5.9
UALVP50505	4.57	6.64	1.92	8	4.5
UALVP50506	4.23	7.55	1.64	7.7	5.5
UALVP50507	4.4	6.14	1.92	6.3	5
UALVP50508	2.28	2.76	1.08	7	4.8
UALVP50509	2.57	4.65	1.48	?	6.3
UALVP50510	2.16	3.57	1.26	?	5.7
UALVP50511	2.49	5.06	1.28	7.14	5.2
UALVP50512	2.16	3.86	1.26	?	5.5
UALVP50513	2.82	3.61	1.24	8.2	6.3
UALVP50514	2.91	4.07	1.26	11	5.5
UALVP50515	3.49	5.19	1.46	8.2	5.2
UALVP50516	2.4	2.88	0.9	8	7.8
UALVP50517	2.52	2.88	1	?	6.6
UALVP50518	2.6	2.94	1.04	8.5	6.2
UALVP50519	1.96	2.48	0.8	11.6	5.7
UALVP50520	3.57	5.48	1.38	8.8	5.5
UALVP50521	3.07	4.23	1.24	7.9	5.4
UALVP50522	3.98	5.23	1.62	9	4.7
UALVP50523	4.48	7.06	1.7	8.2	5.2
UALVP50524	3.9	6.39	1.8	7.7	4.8
UALVP50525	3.07	5.31	1.52	?	5.1
UALVP50526	2.74	4.07	1.1	11	6.1
UALVP50527	2.32	3.82	0.94	10	6.7
UALVP50528	3.49	5.98	1.74	?	5.6
UALVP50529	4.19	6.81	1.82	7	4.5
UALVP50530	3.9	6.14	1.62	8.1	5.3
UALVP50531	4.15	8.38	1.8	6.8	5.1
UALVP50532	4.57	6.31	1.76	6.7	4.5
UALVP50533	3.98	6.72	1.66	?	4.9
UALVP50534	3.98	6.72	1.66	7.6	5
UALVP50535	4.07	6.14	1.7	6.5	5
UALVP50536	3.65	5.56	1.52	7.7	5
UALVP50537	2.49	2.66	1.36	?	5.8
UALVP50538	3.74	6.56	1.32	?	5.5
UALVP50539	3.32	5.64	1.38	?	5.7
UALVP50540	2.91	5.48	1.26	?	5.5
UALVP50541	3.82	5.06	1.74	7.2	4.3
UALVP50542	2.57	3.28	1.08	8.8	6.1
UALVP50543	2.16	3.24	0.98	9.7	5.4
UALVP50544	2.82	3.32	1.3	8	5.5
UALVP50545	2.41	3.61	0.98	9.3	6.1
UALVP50546	1.91	3.65	1.02	?	8
UALVP50547	2.41	2.49	1.16	8.2	5.9
UALVP50548	2.45	2.66	1.16	?	7.5
UALVP50549	4.07	5.31	1.6	?	4.7
UALVP50550	3.98	6.56	1.82	7.25	4.75
UALVP50551	3.15	4.07	1.16	9	5.5
UALVP50552	2.32	3.24	1.04	9.5	6.15
UALVP50553	2.57	3.82	1.06	9.2	6.75
UALVP50554	3.15	4.15	1.4	8.75	5.75
UALVP50555	2.49	4.15	1.06	9	6
UALVP50556	4.9	7.3	1.64	9	5.5
UALVP50557	2.74	3.74	1.06	11.5	6.2
UALVP50558	3.57	5.81	1.46	?	5.5
UALVP50559	3.9	6.23	1.76	10	4.76
UALVP50560	3.65	6.23	1.52	8.5	5.5
UALVP50561	3.57	5.23	1.66	?	5.3
UALVP50562	3.65	4.57	1.64	9.5	5.1
UALVP50563	3.07	5.48	1.52	?	5.6
UALVP50564	3.57	4.81	1.38	7.5	4.3
UALVP50565	4.15	5.64	1.74	8	5
UALVP50566	3.4	5.48	1.64	?	5.2
UALVP50567	3.98	5.48	1.68	7.7	5.3
UALVP50568	3.98	6.89	1.88	10	5.6
UALVP50569	3.57	6.47	1.52	?	4.8
UALVP50570	3.07	3.4	1.36	9	5
UALVP50571	3.3	5.2	1.2	11	5.5
UALVP50572	2.8	4.7	1.1	8.5	6
UALVP50573	3.7	4.5	1.5	7.5	5
UALVP50574	3.5	4.1	1.6	8	5
UALVP50575	3.3	4.3	1.4	6.5	4.5
UALVP50576	2	2.1	1.1	?	7
UALVP50577	2.2	2.84	1.02	8	7
UALVP50578	3.7	6.8	1.5	9	6
UALVP50579	2.1	3.4	1.1	10	7
UALVP50580	2.64	3.48	1	?	7.5
UALVP50581	3.74	5.94	1.42	9.5	6
UALVP50582	3.07	4.73	1.08	?	5.6
UALVP50583	2.57	3.15	1.16	15	6
UALVP50584	3.82	6.14	1.48	6.2	4.9
UALVP50585	3.15	5.73	1.56	?	5.5
UALVP50586	1.64	1.88	0.72	10	7
UALVP50587	2.16	3.82	1.44	?	6.1
UALVP50588	2.44	3.28	1.12	7.7	6.1
UALVP50589	4.4	6.39	2.04	5.2	4.5
UALVP50590	4.65	6.97	1.94	6	4.3
UALVP50591	3.74	4.69	1.56	7	5
UALVP50592	3.49	6.47	1.6	?	5.2
UALVP50593	3.4	6.31	1.72	7.8	5
UALVP50594	3.4	4.48	1.36	6.2	4.8
UALVP50595	2.32	2.74	1.04	8.7	4.6
UALVP50596	3.15	3.32	1.36	5.5	4.7
UALVP50597	2.32	2.66	1.18	10.8	4.7
UALVP50598	4.07	5.98	1.54	8	5.6
UALVP50599	3.2	4.32	1.3	7.7	5.6
UALVP50600	2.57	2.99	1.12	11.5	6
UALVP50601	2.32	3.07	1.02	11	6
UALVP50602	2.57	2.82	1.02	10	6
UALVP50603	1.91	2.57	0.9	12.4	6
UALVP50604	4.48	5.77	1.8	7.4	5.1
UALVP50605	2.57	3.69	1.28	8	6
UALVP50606	3.74	4.81	1.36	?	6
UALVP50607	2.99	3.9	1.26	9	5.1
UALVP50608	2.49	3.49	1.02	8.8	6
UALVP50609	1.74	3.32	0.92	?	7.1
UALVP50610	3.9	4.98	1.64	7.5	4.6
UALVP50611	4.07	8.13	1.72	6.2	4.8
UALVP50612	3.4	4.57	1.58	8.3	4.9
UALVP50613	3.15	3.49	1.4	?	5
UALVP50614	3.65	5.23	1.6	7.8	5.2
UALVP50615	4.48	5.89	1.82	8	4.9
CMNFV8725	5.2	7.1	2.3	5.6	4.6
UALVP48052	2.66	5.06	1.62	9	6
UALVP48081	2.99	5.23	1.5	7	5.25
UALVP50626	3.15	5.98	1.56	7	5.2
UALVP50627	2.41	4.07	1.48	?	5
UALVP50628	3.07	4.9	1.62	6.66	5.2
UALVP50629	3.07	5.56	1.78	?	5.1
TMP1995.177.0048c	2.1	3.4	0.9	?	7
TMP1995.180.0004	2.1	3.5	0.7	?	5
TMP1995.092.0027	2.8	6.5	1.4	?	4.5
TMP1987.154.0063	3.4	8.1	1.9	?	4.25
TMP1987.154.0064	4.2	8.5	2	?	4.5
TMP1987.079.0090	4.4	8.5	1.9	?	4
TMP1995.177.0048a	2.9	6	1.5	?	4
TMP1995.177.0048b	1.9	4.7	1	?	5.5
TMP1995.092.0016	5	12.5	2.2	?	4
TMP1995.092.0016	5	13.5	2.2	?	4.5
TMP1987.153.0055	6	12	2.9	?	4
TMP1987.077.0120	5.3	11.3	3.2	?	3.75
TMP1995.092.0054	6.9	13	3.1	?	4
TMP1995.092.0028	2	5	1.1	?	5
TMP1987.062.0087	4.4	10.3	2.3	?	4
TMP1988.121.0039	5.1	9	2.3	6	4
TMP2003.012.0083	4.96	7.89	2.48	6.2	5.26
TMP2000.057.0080	3.8	7.91	2.25	?	3.88
TMP2002.079.0004	5.08	9	2.14	5.98	3.9
TMP2002.079.0003	5.28	9.08	2.13	6.14	5.06
TMP1974.010.0001	4.2	8.5	2.3	6.5	4
TMP1974.010.0001	4	7.9	2	7.1	4.4
TMP1987.158.0078	2.7	4.2	1.1	?	6.5
TMP1987.019.0068	2	4.6	1	?	6
TMP1987.031.0054	2.4	4.8	1.1	?	5.5
TMP1987.004.0047	2.2	4.1	0.7	?	7
TMP1987.048.0077	4.6	6.7	1.7	?	5
TMP1995.127.0025c	3.7	6.7	1.8	?	4.25
TMP1995.147.0026	1.9	2.8	0.7	?	6.5
TMP1995.151.0010	2.4	3.9	0.9	?	6.5
TMP1995.181.0011	1.9	5	1	?	5
TMP1996.012.0366	4.2	6.3	1.5	?	4.5
TMP1987.158.0080	3.9	9	1.9	?	4.25
TMP1987.158.0081	4.3	11.2	2	?	5
TMP1987.033.0055	4	9.9	2.1	?	4
TMP1987.036.0392	5.5	13	2.2	?	4
TMP1987.051.0023	3.8	8.2	1.4	?	5
TMP1987.072.0023	4.9	9.6	2.2	?	4
TMP1987.072.0026	5	13	2.3	?	4
TMP1987.072.0004	5.4	13	2.5	?	4
TMP1995.012.0109	5.9	13	2.8	?	3.75
TMP1995.126.0029	5	12	2.1	?	5
TMP1995.127.0025a	5.3	11.8	2.3	?	4.25
TMP1995.127.0025b	4.5	7.8	1.8	?	4.75
TMP1995.127.0025d	4.2	7.5	1.7	?	4
TMP1995.129.0002	4.9	9.6	2.2	?	4
TMP1995.131.0012	5.1	9.5	2.1	?	4
TMP1995.137.0002a	5	9.2	2.3	?	4
TMP1995.137.0002b	4.9	10.5	2.1	?	4
TMP1995.179.0003	4.7	10.4	2.2	?	4.25
TMP1995.019.0004	4.2	8	1.5	?	4.5
TMP1995.002.0018	4.2	10.5	2.5	?	3.75
TMP1995.406.0005	4.7	10.3	2	?	5
TMP1996.012.0361	5.9	13	2.7	?	4
TMP1996.012.0363	4.8	9.2	2	?	4
TMP1996.012.0038	5.1	11.7	2.1	?	5
TMP1987.036.0011	4.5	9.5	2.4	?	4
TMP1987.043.0005	5.7	11.2	2.1	?	4.5
TMP1987.046.0053	4.8	9.4	2.2	?	4
TMP1996.012.0102	5.5	11.2	3.2	?	5
TMP1996.012.0104	5.6	10.8	2.6	?	4
TMP1996.012.0112	7.9	16	2.8	?	3.75
TMP1996.012.0115	5.5	14	2.7	?	4.25
TMP1996.012.0118	5.1	9	2.2	?	5.5
TMP1996.012.0034	6.4	13	2.6	?	3.75
TMP1996.012.0360	5	9	1.9	?	4.25
TMP1996.012.0364	5.3	9	2.1	?	4
TMP1995.182.0021	3.5	7.6	1.7	?	4
TMP1995.184.0023	3.7	8.3	1.9	?	4
TMP1995.021.0005	4.7	9.2	2.4	?	3.75
TMP1987.112.0010	3.8	8.7	1.6	?	6
TMP1987.112.0021	5.6	6.3	1.4	?	4.75
TMP1987.112.0009	4.2	8.1	2	?	4.25
TMP1987.112.0028	5.5	11.5	2.2	?	4.25
TMP1987.050.0100	5.2	8.2	2.2	?	4.25
TMP1987.036.0184	3.5	7.5	1.9	?	4.25
TMP1987.036.0418	4.1	9.5	2.6	?	4.5
TMP1987.036.0070	4.1	9.5	2.4	?	4
TMP1987.036.0093	5.3	11.8	2.5	?	4.75
TMP1995.012.0031	5	10.5	2.4	?	4
TMP1995.012.0033	6	13	2.3	?	3.5
TMP1995.012.0038	5.7	11	2.2	?	3.75
TMP1995.012.0040	3.5	7.8	2	?	3.75
TMP1995.012.0042	2.9	7	1.7	?	4.5
TMP1995.012.0043	5	12	2.3	?	4
TMP1995.012.0074a	5.1	10.2	2.4	?	4
TMP1995.012.0074b	3.8	6.3	1.6	?	4.5
TMP1995.012.0074c	4.9	9.4	2.2	?	5.25
TMP1995.124.0004	3.3	6.2	1.5	?	4.25
TMP1987.036.0068	5.7	11.2	2.4	?	4.5
TMP1987.050.0038	6.3	14.2	2.4	?	4
p74105no1	4	9	?	7	4.2
p74105no2	4.1	8	?	7.2	4
p8016440	5.1	9	2.2	6.4	4.2
p848946	3.7	5	?	6	4
p8120259	2.1	3	?	0	6
p8216249	4.3	7	?	8	4
p84989	5.1	9	?	6.4	4.6
p8220173	3.1	5	?	9	5
p80161515	5.9	10	?	5	4.2
p808234	5.3	9	?	5	4
IrvineSaurornitholestes1	5.15	9.55	?	6.12	4.54
IrvineSaurornitholestes2	5.7	10.97	?	?	4.34
IrvineSaurornitholestes3	5.1	7.54	?	5.98	4.72
TMP2005.049.0096	4.69	8.01	2.28	6.86	3.58
TMP2005.049.0119	5.98	11.66	2.48	5.84	4.58
TMP2005.049.0120	5.77	11.25	2.49	?	5.54
TMP2005.049.0074	4.36	9.2	2.45	?	4.28
TMP2005.049.0023	4.89	8.74	2.45	5.5	3.82
TMP2005.039.0007	4.26	7.19	1.98	7.02	4.32
TMP2005.039.0001	5.26	10.78	2.37	5.18	3.78
TMP2005.012.0028	3.93	5.66	1.81	?	4.38
TMP2005.009.0047	5.24	10.8	2.77	?	4.04
TMP2004.116.0026	5.74	11.6	2.67	?	4.28
TMP2004.103.0017	3.67	4.42	1.61	?	3.68
TMP2004.012.0019	5.12	8.18	2.37	6.1	4.06
TMP2003.012.0132	5.42	9.21	2.37	6.18	4.2
TMP2002.060.0006	6.53	9.66	3.73	6.1	3.58
TMP2001.012.0183	4.7	7.67	2.17	8.42	4.34
TMP2001.012.0180	5.6	8.31	2.45	8.64	5.44
TMP2002.060.0008	5.62	10.04	2.37	?	4.04
TMP2001.012.0019	4.33	9.2	?	4.78	3.54
TMP2000.012.0111	5.77	11.03	2.41	6.88	4.5
TMP2000.057.0006	5.79	11.54	3.16	?	3.82
TMP2000.012.0116	4.66	10.1	2.57	?	4.8
TMP2000.012.0114	4.75	7.58	2.38	4.88	4.3
TMP2005.012.??	7.5	12.85	3.68	?	4.9
TMP2004.012.0018	7.07	8.38	3.13	?	5.36
TMP2003.012.0189	5.34	10.1	2.82	?	3.88
TMP1983.036.0236	3.82	7.52	1.75	8.34	6.1
TMP1995.012.0026	1.69	2.2	0.83	6.12	5.42
AMNH001	2.37	5.33	1.41	?	5
AMNH001	2.34	5.01	1.41	?	4
AMNH001	2.08	4.82	1.4	?	6
AMNH001	2.37	4.91	1.61	?	6
AMNH001	2.47	5.58	1.24	?	4.8
AMNH001	2.61	5.99	1.41	?	5
AMNH001	2.35	5.86	1.2	?	4.84
AMNH001	2.54	4.62	0.99	?	6.5
AMNH001	3.22	5.66	1.37	?	4.74
AMNH001	2.15	4.03	1.57	?	5
LSUMG726:5923	4	5.3	2	?	4.5
LSUMG746:6281	4.8	7.2	2.5	?	6.5
LSUMG140:6139	3.7	5.2	1.6	?	5
LSUMG489:5659	2.3	2.8	1.4	?	5
LSUMG491:5950	2	2.2	1.1	?	6
LSUMG113:5109	2.8	4	1.2	?	6
LSUMG113:1309	1.8	2.2	0.8	?	7
LSUMG113:1307	4	6.2	1.8	?	9
LSUMG113:1308	4	5.5	1.9	?	5
LSUMG726:6218	8.3	15	5.8	?	5
LSUMG834:8211	7	10	3.5	?	3.5
LSUMG741:6023	2	3	1.2	?	4.5
LSUMG113:1375	3.6	5.5	3.2	?	6.5
TMP1995.166.0001	5	10	3.5	2.7	2.3
TMP1995.166.0001	6.1	13	?	6	4
TMP1995.166.0001	6.6	15.3	?	5	4
TMP1995.166.0001	5.5	11.9	?	6	4
TMP1995.166.0001	5.6	7.8	?	7	4
TMP1995.166.0001	5.6	10.5	?	5.5	4
TMP1995.166.0001	4.4	7	?	8	4.5
TMP1995.166.0001	5.5	12	3.5	3.5	3
TMP1995.166.0001	3.2	5.7	?	6	5
TMP1995.166.0001	5.5	11.3	?	5.5	4
TMP1995.166.0001	5.2	7.5	2.8	5	4
TMP1995.166.0001	5.2	7	2.6	8	4
TMP1993.012.0021	4.98	7.68	2.48	3.1	2.8
TMP2005.007.0003	5.15	8.38	2.4	5.2	3.2
TMP1990.082.0018	5.81	9.12	2.88	5	3.2
TMP1990.082.0108	5.23	9.36	2.76	2.9	2.8
TMP1990.082.0017	4.73	7.55	2.4	5.1	3.5
TMP1990.082.0021	4.65	6.64	2.36	5.8	3.05
TMP1986.064.0003	5.06	9.6	2.56	5	3.4
TMP1986.064.0002	3.15	4.07	1.58	5.2	3
TMP1985.012.0002	3.24	5.06	1.72	5	3
TMP1985.098.0002	5.48	9.52	2.56	5.4	3.5
TMP1984.064.0003	4.32	5.48	1.88	7.7	4.7
TMP1984.064.0012	4.48	7.3	2.32	5.2	3.5
TMP1984.079.0004	5.6	8	2.6	5.1	3.3
TMP1965.016.0150	4.73	7.22	2.56	0	3.7
TMP1999.050.0117	4.07	6.39	1.99	5.7	3.5
TMP2000.045.0035	3.9	5.81	2.08	5.4	4
TMP2000.045.0103	4.9	10.15	2.41	4.5	3.1
TMP2003.045.0052	4.65	7.06	?	6	4
TMP2003.045.0049	4.23	6.56	2.16	4.6	4
UCMP187070	2.5	5	?	?	6
UCMP124401	4.5	8	?	?	5
UCMP187079	2.2	4	?	?	6
UCMP187054	3	4.5	?	?	7
UCMP187027	4	7	?	?	6
UCMP186891	7	17	?	?	4.5
DSCN1690	6.81	13.89	2.72	5.44	4.16
DSCN1498	2.88	6.48	?	?	4.96
AMNHA	5.07	7.24	2.32	?	4.5
AMNH(M?)	5.72	8.7	2.57	?	4.28
AMNH(5412?)	5.62	11.18	2.68	?	4.68
AMNH(5412?)L	5.77	10.15	2.6	?	4.06
AMNH(5412?)R	6.32	9.28	2.74	5.02	3.82
AMNH(5412?)N	5.4	9.41	2.81	?	3.96
AMNH(5412?)K	5.6	8.55	2.42	5.98	4.5
AMNH(5412?)Q	5.6	7.8	2.89	?	3.96
AMNH27099:5457a	6.7	8.48	2.83	5.74	4.28
AMNH27099:5457b	5.8	10.34	3.1	?	3.84
AMNH27099:5462a	6.13	9.7	2.54	5.1	4.34
AMNH27099:5462b	5.5	8.35	2.34	8.82	5
AMNH27099:5464	7.12	10.8	3.5	5.82	3.52
AMNH5475a	5.7	8.49	2.22	?	4.54
AMNH5475b	5.49	7.36	2.6	7.74	4
AMNH5477L	4.73	6.83	1.89	7.38	5.16
AMNH5477R	4.78	7.02	2.04	6.66	4.16
AMNH5695	5.52	10.6	3.02	?	4.54
AMNH(M)5690	6.25	13.16	3.63	?	3.64
AMNH5688	3.48	6.87	2.17	?	4.58
AMNH5688cent	4.08	7.99	1.56	?	5
AMNH5682	4.05	7.69	2.55	?	4.32
AMNH5697	4.48	10.73	3.08	?	4.76
AMNH5703	3.14	7.73	2.01	?	5.1
AMNH5671.2	4.99	8.85	2.19	?	4.48
AMNH5545.1	4.42	7.8	?	?	4.72
AMNH5671.1	4.84	6.45	2.07	?	4.96
UCMP187125	4	7	?	?	4
UCMP187129	4	9	?	?	4.5
UCMP187124	6	12	?	?	4
UCMP187105	5	8	?	?	5
UCMP187143	3.6	8	?	?	5
UCMP187139	3.2	7	?	?	5.5
UCMP134801	3.7	10	?	?	5
UCMP187048	5.8	13	?	?	5
UCMP187049	3	6	?	?	7
UCMP186944	3.5	6	?	?	6
UCMP187194	3.2	5.5	?	?	6
UCMP186957	3.3	5	?	?	5.5
UCMP186962	3.4	5	?	?	5.5
UCMP187041	4	8	?	?	6
UCMP187042	3	5	?	?	6
UCMP187043	2.5	4.5	?	?	6.5
UCMP187044	3	4	?	?	6
UCMP187045	3	5	?	?	5
UCMP187046	2.3	4	?	?	8
UCMP187036	5	8	?	?	5
UCMP187034	6	12	?	?	4.5
UCMP187033	5	12	?	?	4
UCMP187030	5	8	?	?	5
UCMP187025	4	6	?	?	7
UCMP187006	6	12	?	?	5
UCMP187038	4	7	?	?	5.5
UCMP187010	3	6	?	?	6
UCMP187083	5	8	?	?	6
UCMP174796	3.4	5	?	?	4.5
UCMP187200	2.2	3.5	?	?	7
UCMP187197	3.5	5.5	?	?	5.5
UCMP187199	3.6	5	?	?	5.5
UCMP187198	2.6	4	?	?	7
UCMP186958	2.6	4	?	?	6
UCMP186959	3	5	?	?	7
UCMP186961	3.2	8	?	?	5
UCMP79095	4	7	?	?	6
UCMP124987	6	15	?	?	4
UCMP120339	9	17	?	?	4
UCMP186957	4.5	7	?	?	4.48
UCMP120305	9	17	?	?	3.5
UCMP186960	5	10	?	?	4.5
UCMP187037	3.6	10	?	?	4.5
UCMP187039	4.5	9	?	?	5
UCMP186967	7	13	?	?	4
UCMP186968	6	10	?	?	3.5
UCMP186972	6	10	?	?	4
UCMP186970	7	13	?	?	4
UCMP186973	2.8	7	?	?	5
UCMP186971	7	13	?	?	4
UALVP48460	5.43	8.58	3.08	7	4
UALVP48458	3.82	4.57	2.36	4	3.6
UALVP48480	2.04	2.12	1.06	3	4
UALVP48461	7.53	9.98	3.84	6	3.5
UALVP48462	8.75	17.33	4.07	3.5	3
UALVP50220	7.88	14	4.9	4	3.5
UALVP50221	3.82	4.15	1.86	8.8	4
UALVP50222	5.81	6.39	3.04	5.5	4
UALVP48422	4.32	5.23	2.4	6	5
UALVP48424	5.48	11.55	3.4	?	4.1
UALVP49568	2.16	4.9	1.52	?	4.4
UALVP49569	4.32	7.06	1.88	9.4	4.6
UALVP47995	4.15	4.73	1.88	?	5
UALVP47996	3.74	4.07	1.52	7.5	4.5
UALVP48062	4.9	7.39	1.96	7	5
UALVP48069	3.32	6.64	1.62	?	5
UALVP48071	3.74	5.06	1.56	6.5	4.5
UALVP48420	6.3	9.1	2.8	5	4
UALVP48426	5.31	5.64	2.44	7	4.3
UALVP48439	8.58	15.93	5.06	5	4
UALVP48472	4.32	4.9	2.36	5.5	4.6
UALVP49570	3.49	4.73	1.6	7.4	4.5
UALVP49571	4.73	8.05	3	?	5
UALVP49572	2.3	3.4	1.2	8	5
UALVP49573	7.53	8.23	4.23	4.3	3.8
UALVP49574	8.75	11.38	6.56	?	4.6
UALVP49575	3.07	5.31	1.7	?	5.1
UALVP49576	3.4	6.97	1.78	7	5
CMNFVuncat	5.6	9.5	3	5	3.7
UALVP48028	2.66	4.98	2.32	?	4.6
UALVP49594	2.66	3.82	2.2	?	4.1
UALVP49595	2.74	5.73	2	6	4.25
UMNH424-14398	3.97	4.44	2.15	7	5.1
TMP1999.055.0328	3.9	8.5	2.3	?	4
TMP1989.077.0006	4.5	11.5	2.9	?	3.26
TMP1989.077.0006	4.7	11	2.8	?	3.5
TMP1992.077.0002	5.9	10.5	3.9	?	4
TMP1985.068.0032	5.3	14.5	4.2	?	3.5
TMP1987.153.0056	5.7	9.5	3.9	?	3.5
AMNH5356	7.21	12.86	4.06	2.76	3.4
AMNH5356	6.84	11.58	3.7	3	3
AMNH5356	7.64	12.38	4.02	3.16	3.5
AMNH5356	6.28	10.68	3.13	1.76	3
AMNH5356	6.69	10.98	3.32	3	3.26
AMNH5356	5.7	9.7	3.11	3.5	4.5
AMNH5356	5.46	9.4	4.03	3	5
AMNH5356	6.09	11.55	3.81	2.76	3
AMNH5356	6.47	11.22	3.91	3	3.5
AMNH5356	6.56	11.27	3.89	3	3.5
AMNH5356	5.56	8.52	3.27	3.4	3.5
TMP1985.036.0332	3.6	6.4	2.3	?	5
TMP1995.143.0045	4.1	9	2.8	?	4
TMP1980.008.0298	4.3	9.8	2.7	?	3
TMP1980.008.0308	4.9	8.5	2.7	?	3.5
TMP1981.016.0281	5	10	3.2	?	3
TMP1995.406.0004	5	11.4	3.5	?	3.5
TMP1986.130.0218	5.1	10.8	3.1	?	3.25
TMP1986.130.0211	5.2	9.5	3.1	3.04	3
TMP1981.026.0175	5.4	11	3.2	3.96	3.5
TMP1998.093.0172	5.4	10.5	2.9	?	3.5
TMP1981.014.0060	5.5	11.5	3.7	?	3.5
TMP1995.171.0040	5.5	12.3	3.7	?	4
TMP1995.171.0040	6.2	14	3.5	?	4
TMP1966.025.0016	5.7	14	3.3	3.72	3.25
TMP1979.008.0732	6.1	13	3.9	?	3.5
TMP1980.016.2094	7.1	13.5	4	?	3.5
TMP1981.027.0066	7	13.5	4.5	?	3
TMP1982.018.0137	6.4	11	4	?	3.25
TMP1983.067.0038	7.8	13.2	4.1	?	3
TMP1984.067.0115	6	12	3.2	3.48	3.5
TMP1984.089.0048	6	14.5	3.5	?	4.5
TMP1986.018.0099	6	13.5	3.7	?	3.25
TMP1986.076.0011	7.9	17.2	5.1	?	3.5
TMP1989.155.0002	7.9	14.5	4	?	3.25
TMP1989.036.0354	6.1	13	3.7	?	3
TMP1993.036.0460	5.4	16.5	4	?	3
TMP1993.036.0462	6.5	13.5	3.7	?	3.5
TMP1993.036.0472	6.5	13	4	?	3.75
TMP1994.012.0241	7.2	15.5	3.9	?	3.75
TMP1994.012.0247	7.1	15.5	4.3	?	3
TMP1994.012.0652	6.4	12.5	4.3	?	3.75
TMP1994.172.0039	5.6	12	3.9	?	3
TMP1995.127.0026-a	6.3	10.5	3.6	?	3
TMP1995.137.0001	6.1	10.5	3.3	?	5
TMP1996.012.0362	6.3	13.5	3.9	?	3.25
TMP1995.151.0010	6.8	13	3.3	?	3.75
TMP1979.014.1000	4.2	8.8	2.7	?	3
TMP1979.015.0002	5.5	13	3.9	?	3
TMP1981.016.0161	4	10.5	3	?	3
TMP1981.022.0093	3.5	7.8	2.7	?	3.5
TMP1984.089.0047	5	11	4.1	?	3.25
TMP1985.036.0336	4.9	11	3.5	?	4
TMP1985.052.0010	3.8	6.5	2	?	4.5
TMP1985.059.0081	5.5	12	3.4	?	3.25
TMP1985.068.0047	4.9	9.8	2.5	?	3.25
TMP1986.054.0067	3.8	8	2.8	?	3.5
TMP1988.050.0127	4.1	10	2.5	?	3.5
TMP1990.145.0001	5.8	10.7	3.9	?	3
TMP1994.012.0266	3.8	9.2	2.9	?	3
TMP1995.134.0005	5.1	11	4.2	?	3.5
TMP1995.151.0008	4.3	10.5	3.1	?	3.5
TMP1995.181.0009	3	7.3	2.1	?	4
Bobssite	6	13	4.6	?	3
p812648	6.2	11	?	3.4	3.6
p80897	7	1	?	3	2.8
p836738	7.8	12	4.2	3.4	3
CMNFVuncat	7.1	11	?	3.2	3
CMNFVuncat	6	12	?	3.2	3
p8218137	6.2	9	?	3.2	3.2
p8220388	7.9	19	?	3.6	3.2
p849912	7.4	14	?	4	3.4
TMP1980.008.0214	5.04	9.04	3.12	?	5.02
TMP1985.066.0056	5.16	10.96	2.96	2.84	3.04
TMP2001.012.0179	5.04	10.31	?	2.56	2.84
TMP2001.012.0181	7.3	12.52	4.53	3.04	2.94
TMP1998.084.0003	7.39	8.88	3.44	4.4	4
TMP1985.098.0005	4.73	9.28	3	2.8	3
TMP1983.045.0003	4.81	11.2	4.03	4.9	5
TMP2003.045.0060	5.43	9.63	2.49	4	4
TMP1998.063.0071	4.57	6.56	1.99	4.3	4.3
TMP1998.064.0017	5.95	9.63	3.15	5	3.3
TMP1999.050.0116	7.7	11.73	4.03	4	3.5
TMP2000.045.0040	6.56	9.98	2.82	4.5	3.8
TMP2000.045.0102	6.48	9.63	2.91	?	4
TMP2000.045.0082	6.13	11.03	3.4	3.8	3.2
TMP2001.045.0083	7.88	16.63	4.73	4	3
TMP2002.045.0050	6.65	11.2	3.32	4.3	3.6
TMP1998.063.0032	7.44	11.76	4.06	4.1	3.1
TMP2009.122.0004	6.56	9.92	3.2	4.3	3.5
TMP2009.122.0002	5.4	8.8	3	3.8	3.4
TMP2005.007.0005	3.57	8.16	2.44	0	3.8
UALVP48431	2.44	4.73	2.04	?	4
UALVP48468	3.32	5.31	1.8	7	4.5
UALVP49582	4.07	7.06	1.64	?	4.3
UALVP49583	4.9	8.22	2.4	?	4.1
UALVP49584	2.91	5.64	2.16	?	4.1
UALVP49585	2.74	5.31	2.28	?	4.7
UALVP49586	2.08	4.81	1.96	?	4.86
UALVP49587	2.24	4.98	1.74	?	5.2
UALVP49588	2.82	5.81	2.16	?	4.3
UALVP49589	2.99	5.23	2.28	?	4.8
UALVP49590	2.32	4.23	1.58	?	4.9
AMNHFR3953	6.5	12	3	?	3.03
TMP1984.163.0080	6.1	10	2.4	?	3.25
TMP1980.016.0833	6.3	11	3.2	?	3.5
TMP1982.019.0458	5.7	12.5	2.5	?	3.5
TMP1982.019.0458	5.8	13	2.5	?	3.5
TMP1982.019.0007	7.2	15	3.2	?	3
TMP1985.058.0065	5.4	10.5	2.5	?	3.5
TMP1985.006.0002	6.5	13	3	?	3.25
TMP1986.077.0112	7.9	14	3.1	?	3.25
TMP1987.036.0005	6.6	15.5	3	?	3.25
TMP1989.036.0312	6.4	11.5	3.1	?	3.25
TMP1994.012.0268	5.8	11	2.5	?	3.75
TMP1997.133.0002	6.3	12	3.4	?	3.5
TMP1979.015.0003	6.3	15.5	3	?	3
TMP1984.091.0040	6	12.5	3	?	3.25
TMP1984.091.0040	6.4	12	3	?	3
TMP1985.006.0131	6.3	11.2	2.4	?	3.5
TMP1985.006.0133	6.4	11.7	3	?	3.25
TMP1986.036.0425	7	12	3	?	3
TMP1987.050.0008	6.8	13.7	3.3	?	3
TMP1989.050.0202	5.3	9.3	2.1	?	3.25
TMP1990.050.0208	5.8	11.5	2.6	?	3.5
TMP1990.053.0021	5	11	2.3	?	3.5
TMP1991.050.0060	6.4	14	2.5	?	3
MOR553	4.92	7.22	2.43	3.76	2.25
MOR554	6.22	9.61	2.95	2	2
MOR555	6	9.39	3.03	2	1.75
MOR556	5.6	8.47	2.71	2	2.5
MOR557	5.2	7.84	2.33	2.5	2.5
MOR558	4.45	7.25	1.62	2.5	2.5
Fukui22	5.7	8.7	2.6	2.2	2.4
p849114	5.2	9	?	1.5	1.5
p798498	5	7	?	1.42	1.62
p841832	5.2	9	?	1.5	1.66
p80161370	5.7	8	?	1.42	1.36
p8219370	4.8	9	?	1.54	1.66
p80161950	5.1	8	?	1.88	1.94
p8561	4.3	8	?	1.08	1.42
p7412	6.2	9	3.4	0.94	1.56
p8116501	5.9	8	?	1.86	1.66
p841685	5.6	8	?	2.14	1.88
TMP2000.012.0117	4.51	6.67	2.22	2.4	2.24
TMP1996.012.0072	4.96	8.61	2.55	2	1.78
TMP1995.012.0011	5.35	8.01	2.65	?	2.16
TMP1995.021.0010	4.99	6.92	2.81	1.84	2
TMP1989.089.0004	2.97	3.89	1.53	?	3.38
TMP1987.050.0034	3.26	4.55	1.79	?	2.06
TMP1986.216.0004	4.88	6.56	2.32	?	2.1
TMP1987.036.0139	5.91	8.36	2.72	2.64	2.26
TMP1989.050.0129	4.01	4.16	1.99	?	1.98
TMP1986.177.0008	3.45	3.37	1.55	?	2.98
TMP1985.066.0073	3.31	4.57	1.69	?	2.42
TMP1989.116.0063	3.39	4.48	1.83	2.34	2.16
TMP1984.089.0275	5.21	8.76	2.44	2.28	1.96
TMP1986.023.0091	2.86	3.56	1.25	?	3.22
TMP1986.008.0093	3.62	3.33	1.73	?	2.96
TMP1986.130.0016	5.02	7.44	2.42	3.04	2.54
TMP1983.036.0214	4.29	6.5	2.73	1.4	1.64
TMP1985.056.0182	5.85	10.38	3.33	2.42	1.92
TMP1985.056.0179	5.83	7.72	2.93	?	2.04
TMP1986.054.0066	1.53	2.33	1.1	2.76	2.2
TMP1994.016.0015	3.62	5.4	?	1.74	2.42
TMP1987.036.0301	4.18	5.24	1.94	1.42	1.62
TMP1987.077.0135	3.58	3.46	1.69	?	2.94
TMP1995.127.0027	5.2	7.6	2.8	2	2
TMP1990.034.0001	4.7	6	2	0	2.4
TMP1986.202.0005	2.5	3.1	1.3	0	4
TMP2000.019.0001	2.8	5.5	1.2	?	2
TMP2000.021.0001	3.1	5.2	1.2	?	1.5
TMP1979.008.0635	2.4	3.3	0.9	?	2
TMP1997.044.0004	5.67	7.4	3.31	1.62	2.1
TMP1994.009.0004	5.68	7.36	2.76	1.06	1.72
TMP1987.012.0014	5.25	7.83	2.79	0.94	1.28
TMP1988.096.0007	6.29	8.92	3.12	1	1.34
TMP1998.068.0156a	6.39	8.48	3.2	1.2	1.9
TMP1998.068.0156b	5.81	7.64	2.96	0.75	1.4
TMP1998.068.0156c	5.56	8.05	3.24	0.85	1.5
TMP1997.007.0003	5.48	6.97	3.16	1.6	1.7
TMP1997.077.0004	5.56	7.04	3.4	1.3	2
TMP1994.009.0004	5.48	6.14	2.8	0.8	1.6
TMP1990.082.0024	5.98	7.76	3.28	1.3	2
TMP1990.082.0025	3.4	4.9	1.58	2.7	2.4
TMP1990.082.0026	5.48	7.3	3.12	1.4	1.9
TMP1988.096.0002	6.31	8.4	3.28	0.7	1.25
TMP1985.031.0019	5.31	6.64	2.76	1.1	1.3
TMP1983.045.0005	5.73	7.52	3.24	0.95	1.7
TMP1983.045.0006	5.89	7.39	3.48	1	1.6
TMP1974.001.0002	6.23	8.4	3.44	0.95	1.9
TMP1974.001.0001	4.57	6.31	2.48	3	2
TMP1985.012.0002	3.5	4.1	1.7	0	2.4
TMP1985.030.0032	3.07	5.4	1.42	0	1.7
TMP1998.063.0043	6.13	10.68	3.57	1.6	1.4
TMP1999.050.0115	5.78	10.68	3.68	1	1.3
TMP1999.050.0114	5.56	6.81	2.82	1.5	2
TMP2000.045.0090	3.49	5.23	1.99	?	2.4
TMP2000.045.0024	3.57	4.4	2.24	?	2.2
TMP2000.045.0091	5.43	9.98	3.4	0.9	1.7
TMP2001.045.0080	7	12.08	4.07	1.1	1.6
TMP2001.045.0081	4.81	6.64	2.82	1.8	2.2
TMP2002.045.0048	5.56	7.72	?	1.5	2
TMP2003.045.0058	4.98	7.06	2.66	1.6	1.9
TMP2009.122.0001	6.31	9.44	3.68	1.2	1.6
TMP1995.002.0023	5.48	6.23	2.48	1.5	2.3
TMP1993.012.0013	5.48	6.97	3.32	1.3	1.7
TMP1989.125.0014	2.4	4.48	2	1.15	1.3
TMP1987.012.0019	6.06	7.36	3.28	0.7	1.2
UCMP187076	2.2	3	1	?	4
UCMP187075	2.7	4.5	1	?	3.75
UCMP187073	2.9	4.3	1.1	?	3.5
UCMP187074	2.7	4.2	1.1	?	4
UCMP187067	2.7	3.8	1	?	3.5
UCMP187068	2.6	3.1	1	?	4.5
UCMP187069	2.7	4.1	1	?	4
UCMP187066	3	3.5	1	?	3
UCMP187063	2.4	3.9	0.9	?	4
UCMP187065	2	4.1	1	?	3
UCMP187059	2.1	3.2	0.8	?	5
UCMP214059	1.9	3.4	1.3	?	3
UCMP186886	3.2	4	1	?	3
IMG1675	2.78	3.83	?	?	3.14
AMNH5731#2	2.52	4.43	1.09	?	1.92
AMNH5731#1	2.44	3.93	0.91	?	2.02
AMNH5731#3	2.39	4.22	1	?	1.98
AMNH5728.1	2.47	4.9	1.12	5.06	2.9
AMNH5728.2	2.89	4.99	1.12	?	3.2
AMNH5728.3	2.93	4.85	1.1	6.48	3.18
AMNH5719.1	2.74	3.88	0.96	?	3.06
AMNH5719.2	2.53	3.25	0.87	?	3.74
AMNH5719.3	2.64	3.19	0.82	?	3.28
AMNH5502.1	2.74	5.55	1.15	?	3.4
AMNH5502.2	2.63	4.8	1.18	5.94	3.38
AMNH5502.3	2.52	4.3	1.22	11.58	3.82
AMNH5733.1	2.31	4.26	0.93	?	2
AMNH5706.1	2.21	2.62	0.62	?	3.96
AMNH5706.2	2.36	2.73	0.63	?	4.04
AMNH5706.3	2.35	2.6	0.7	?	3.9
AMNH5489.1	3.12	5.63	1.46	?	1.56
AMNH5489.2	2.93	4.35	1.17	?	2.1
AMNH5489.3	2.56	4.5	1.07	?	1.74
AMNH5725.1	2.69	3.72	1.12	?	2.88
AMNH5725.2	2.51	3.1	1.05	?	3.74
AMNH5725.3	2.35	3.16	?	?	2.52
AMNH5722.1	2.53	3.22	?	?	3.52
AMNH5722.2	2.4	3.9	?	9.38	4.66
AMNH5722.3	2.33	3.56	?	7.8	4.42
IMG1672	2.69	3.12	?	?	3.22
UCMP186904	2	3	0.7	?	3.5
UCMP128845	3.2	4.6	1.1	?	4
UCMP128787	3.6	4.6	1.7	?	2.5
UCMP186868	2.2	2.9	0.9	?	4
UCMP186885	2.1	3	0.7	?	4.5
UALVP47985	2.24	2.88	0.98	8	6.5
UALVP47986	2.52	4.15	1.3	7	6
UALVP47997	2.32	3.4	1.28	?	5.4
UALVP48038	4.15	5.81	1.64	?	6.5
UALVP48072	3.49	5.56	1.88	?	5.6
UALVP48112	3.65	5.4	1.2	10.8	5.7
UALVP48115	2.04	2.52	0.92	10	6.5
UALVP48142	1.88	3.04	0.95	?	9
UALVP48143	2.48	2.8	1.04	?	10
UALVP48158	1.88	2.12	0.88	?	7
UALVP48182	2.48	3.28	1.08	9	7
UALVP48183	1.6	2.96	0.98	?	9
UALVP48188	2.12	2.52	0.94	?	7
UALVP48195	1.92	2.92	1	?	11
UALVP48196	2.2	2.56	0.8	?	8.5
UALVP48212	2.82	5.06	1.48	?	8
UALVP48213	2.4	3.24	1.1	?	9
UALVP48214	2.12	3.2	1.08	?	6.5
UALVP48216	3.98	4.73	2.02	?	7
UALVP48224	1.32	1.76	0.62	?	9
UALVP48225	1.76	2.76	0.78	?	10.3
UALVP48247	3.07	4.57	1.54	?	6.26
UALVP48250	2.52	3.82	1.36	?	9
UALVP48251	2.48	3.4	1.2	8.3	7
UALVP48252	4.32	6.56	1.24	8.5	6.5
UALVP48253	1.8	2.88	0.82	10	7
UALVP48259	2	2.96	1.02	?	7.6
UALVP48266	2.36	3.16	1.06	?	6.5
UALVP48275	2.8	4.9	1.74	?	7.2
UALVP49806	2.08	2.68	1.16	10.5	9
UALVP49807	2.36	2.68	0.92	9.8	7
UALVP49808	2.44	2.8	0.94	?	6.6
UALVP49809	2.16	4.07	1.48	?	5.8
UALVP49810	3.15	4.32	1.84	?	7.5
UALVP49811	3.57	4.73	1.92	9.1	6.7
UALVP49812	2.82	4.73	1.2	9	6.4
UALVP49813	3.24	4.65	1.72	?	7.5
UALVP49814	2.57	3.82	1.22	8	6.7
UALVP49815	1.96	2.96	0.82	?	10.1
UALVP49816	3.32	6.39	1.88	?	7.76
UALVP49817	2.16	2.57	0.92	8.8	6.4
UALVP49818	3.65	7.3	1.78	8.2	6.2
UALVP49819	2.91	4.15	1.42	10	7.7
UALVP49820	3.15	5.56	1.84	?	7.2
UALVP49821	2.56	3.44	1.22	?	7.7
UALVP49822	2.16	3.52	0.9	10	6.5
UALVP49823	2.4	3.24	0.94	11.4	10
UALVP49824	1.92	3.04	0.81	12	9.4
UALVP49825	1.68	2.4	1	?	6.3
UALVP49826	2.91	4.07	1.24	9	6.9
UALVP49827	2.2	3	1.04	?	6.7
UALVP49828	2.08	2.68	0.96	7.8	6.3
UALVP49829	2.53	3.74	0.92	?	7.5
UALVP49830	2.74	4.32	1.22	10.2	7.5
UALVP49831	2.52	3	1.12	?	8.2
UALVP49832	2.16	3.98	1.04	10.4	6.7
UALVP49833	2.6	2.68	0.86	9.6	8.1
UALVP49834	1.83	3.49	0.9	?	6.7
UALVP49835	3.32	4.23	1.3	7.5	5.9
UALVP49836	3.57	6.31	1.84	?	5.7
UALVP49837	1.91	2.91	1.06	9.5	6.5
UALVP49838	4.07	6.56	2.28	?	6.3
UALVP49839	1.91	3.49	0.86	9.6	6.7
UALVP49840	2.24	3.98	1.2	8	5.5
UALVP49841	2.16	3.9	1.16	?	7.4
UALVP49842	3.15	3.9	1.48	6.5	6.6
UALVP49843	2.41	3.82	1	8.2	6.5
UALVP49844	2.57	3.28	1.06	7	6
UALVP49845	2.28	3.12	1	9.4	7.7
UALVP49846	2.08	2.64	0.9	?	9.2
UALVP49847	2.44	2.8	1	7.4	6.4
UALVP49848	2.44	3.04	1.14	7.6	6.3
UALVP49849	2.52	3.36	0.96	7.3	7.2
UALVP49850	2.16	3	0.86	?	8
UALVP49851	2.48	3.04	0.92	?	9.8
UALVP49852	2.04	2.9	0.7	?	9
UALVP49853	1.96	2.8	0.98	?	11.2
UALVP49854	2.6	2.88	1.06	?	9
UALVP49855	1.68	1.88	1.04	?	8.8
UALVP49856	1.76	2.08	0.98	?	8.3
UALVP49857	1.68	2.1	0.82	?	10.2
UALVP49858	2.41	3.98	1.26	?	5.5
UALVP49859	2.24	4.48	1.44	?	5.9
UALVP49860	2.82	3.53	1.16	8.1	6
UALVP49861	1.8	2.12	0.96	?	8.5
UALVP49862	2	2.12	0.78	12	9
UALVP49863	3.65	5.73	1.36	?	6.4
UALVP49864	2.32	2.76	1.2	?	8.7
UALVP49865	2.68	3.44	1.36	9	9
UALVP49866	2.24	3.15	0.96	?	7.8
UALVP49867	3.65	6.1	1.44	8.8	6
UALVP49868	3.4	4.48	1.6	?	8.1
UALVP49869	3.2	4.73	1.56	?	7.6
UALVP49870	3.07	4.19	1.5	?	7.3
UALVP49871	2.74	3.9	1.24	?	5.7
UALVP49872	2.82	3.9	1.28	7.5	6.2
UALVP49873	3.4	3.74	1.6	?	7.9
UALVP49874	3.15	3.65	1.18	?	7.1
UALVP49875	2.91	3.78	1.06	8.8	6.8
UALVP49876	2.41	2.99	1.08	7.2	7.1
UALVP49877	2.74	3.4	1.18	?	6.5
UALVP49878	2.41	2.95	0.88	10.8	6.8
UALVP49879	2.24	2.99	1	10.6	7.6
UALVP49880	2.2	2.48	1	8	7.9
UALVP49881	2	2.38	0.92	?	8
UALVP49882	1.92	2.44	0.8	8.4	8.7
UALVP49883	3.15	3.98	1.66	?	8
UALVP49884	1.88	2.32	0.84	8.7	8.2
UALVP49885	2.8	3.6	1	9	7.5
UALVP49886	1.9	2.1	1.1	?	8
UALVP49887	2.4	3	1	?	9
UALVP49888	2.4	4.2	1.4	?	9.5
UALVP49889	2.4	3.1	1.1	10	9
UALVP49890	2.4	3.3	1.1	?	10
UALVP49891	3.5	5.2	1.4	10	6
UALVP49892	2.24	3.49	0.96	8	6.5
UALVP49893	2.49	3.65	1.45	?	6.6
UALVP49894	3.74	4.98	2.2	8	6.25
UALVP49895	2.91	5.06	1.44	?	5.6
UALVP49896	2.66	3.9	1.1	10	6.6
UALVP49897	3.24	4.9	1.48	?	8
UALVP49898	3.4	4.48	1.52	?	6.8
UALVP49899	3.2	5.4	1.7	?	5.5
UALVP49900	3.15	4.69	1.56	12	8.5
UALVP49901	2.82	4.32	1.38	?	8
UALVP49902	2.86	4.98	1.46	?	7
UALVP49903	2.66	4.9	1.44	?	8
UALVP49904	3.65	4.07	1.7	?	8
UALVP49905	3.15	3.98	1.54	?	8
UALVP49906	2.99	4.48	1.52	?	7.3
UALVP49907	3.24	5.48	1.68	?	7.5
UALVP49908	2.74	3.24	1.26	?	8.6
UALVP49909	2.49	4.36	1.4	?	8.5
UALVP49910	2.91	4.9	1.76	?	7.5
UALVP49911	2.6	3.5	0.9	8	7
UALVP49912	2.49	3.65	1.18	?	7.76
UALVP49913	2.32	3.12	0.88	?	8.3
UALVP49914	2.08	2.7	0.96	?	8
UALVP49915	1.96	3.24	0.94	?	8
UALVP49916	2.91	4.81	2.2	?	6.8
UALVP49917	3.74	5.4	1.94	9	6.7
UALVP49918	3.82	4.98	1.76	?	6.5
UALVP49919	3.4	4.98	1.42	10.4	6.2
UALVP49920	2.99	4.73	1.58	?	7.2
UALVP49921	5.64	5.06	1.62	?	8
UALVP49922	2.95	4.32	1.46	?	7.3
UALVP49923	2.82	3.4	1.32	?	6.3
UALVP49924	3.15	4.07	1.34	?	7.2
UALVP49925	2.41	3.61	1.16	9.2	6.5
UALVP49926	2.76	3.4	1.14	9	7.2
UALVP49927	2.28	3	0.96	8.5	6.2
UALVP49928	2.82	3.15	1.06	?	6.8
UALVP49929	2.08	3.28	1.46	?	9
UALVP49930	2.52	3.12	0.97	8.3	7.1
UALVP49931	2.32	3.28	0.98	?	7.8
UALVP49932	2	2.68	0.96	?	7.3
UALVP49933	2.32	3.04	0.86	?	7.5
UALVP49934	2.4	2.8	0.81	6.4	6.8
UALVP49935	2.44	2.72	0.94	?	6.5
UALVP49936	2	2.8	0.84	10	7.4
UALVP49937	1.92	2.2	0.8	9	6.8
UALVP49938	1.84	2.86	0.7	?	6.5
UALVP49939	2.28	2.46	0.8	7.7	9
UALVP49940	2	2.28	0.94	8.8	7.4
UALVP49941	3.65	5.81	1.66	8.1	7
UALVP49942	2.82	4.32	1.56	?	8
UALVP49943	2.57	3.4	1.36	?	8.5
UALVP49944	1.88	2.16	0.9	10.8	8
UALVP49945	2.64	3	1.08	?	8.5
UALVP49946	1.36	2	0.72	?	14.6
UALVP49947	2.24	4.15	1.34	?	5.5
UALVP49948	2.24	3.9	1.56	?	5.5
UALVP49949	3.45	4.32	1.56	?	6
UALVP49950	2.74	3.82	1.12	7.3	5.8
UALVP49951	3.32	3.74	1.18	?	6.8
UALVP49952	3.15	3.74	1.16	?	7
UALVP49953	2.32	3.32	1.14	?	7.8
UALVP49954	3.82	5.69	1.34	10.2	6.1
UALVP49955	2.91	3.03	1.36	?	10.5
UALVP49956	2.49	4.48	1.26	?	5.6
UALVP49957	3.65	4.15	1.78	8	6.3
UALVP49958	1.99	2.99	0.92	?	8.3
UALVP49959	2.24	3.4	0.82	?	8
UALVP48114	2.4	5.06	1.22	?	5.8
UALVP48140	2.44	3.24	1.12	?	10.5
UALVP48156	2.56	2.88	1	?	7
UALVP48157	2.64	3.88	1.32	?	8
UALVP48159	2.4	3.6	1.2	?	8
UALVP48194	2.4	2.92	1.1	?	9
UALVP48208	4.07	10.5	2.68	?	6
UALVP48211	2.4	3.2	0.98	?	8
UALVP48215	4.48	5.89	2.24	?	7
UALVP48217	3.56	3.98	1.72	?	7
UALVP48219	3.4	3.65	1.74	?	7
UALVP48220	3.8	4.15	2.24	8.5	7
UALVP48276	2.44	2.76	1.12	?	8
UALVP50010	3.68	8.93	2.52	?	6.4
UALVP50011	2.91	4.57	1.48	?	11
UALVP50012	3.07	4.15	1.46	?	7.5
UALVP50013	3.03	6.89	1.42	?	6.3
UALVP50014	2	3.48	1.04	?	10.2
UALVP50015	1.48	3.12	0.96	?	10.2
UALVP50016	3.74	6.81	1.82	?	6.5
UALVP50017	2.32	4.65	1.36	?	5.8
UALVP50018	2.99	4.81	1.7	?	6
UALVP50019	1.6	2.6	0.84	10.6	10.3
UALVP50020	2.8	4.5	1.2	?	8
UALVP50021	2.2	4	1.6	?	8
UALVP50022	1.6	3.2	0.9	?	10
UALVP50023	2.49	4.48	1.46	?	5.9
UALVP50024	3.3	5.8	1.4	?	8
UALVP50025	1.64	2.68	0.9	?	8
UALVP50026	2.41	4.32	1.36	?	9
UALVP50027	2.24	5.23	1.26	?	8
UALVP48210	1.72	3.2	1.36	?	7.3
UALVP48265	2.4	3.72	1.84	?	10
UALVP48277	2.36	2.8	1.18	?	6
UALVP50040	2.2	5.1	1.7	?	11
UALVP50041	2.49	4.57	2.04	6.6	5.3
UALVP50042	3.15	5.15	1.56	?	5.4
UALVP50043	3.32	5.48	1.74	6.4	5.5
UALVP50044	2.99	5.15	2.32	?	7.5
UALVP50045	1.83	3.15	1.3	?	7.5
UALVP50046	3.15	5.23	1.92	9.4	7
UALVP50047	2.91	4.81	1.42	?	6
UMNH99-12805	2.68	3.3	1.36	0	8.2
UMNH424-14238	2.31	2.79	1.15	9.5	8.2
UMNH424-17370	3.49	4.42	1.62	0	7
UMNH424-17382	3.32	5.58	1.8	0	6.4
UMNH424-17220	1.82	2.21	0.71	0	7.7
UMNH424-17220	2.05	2.38	0.75	9.2	7.6
UMNH424-17220	3.62	5.78	1.42	6.2	6.7
UMNH424-17220	3.68	6.63	2	0	6.6
TMP1986.171.0061	1.9	3.4	0.9	?	8
TMP1986.171.0009	2.3	4.2	1	?	8
TMP1987.080.0035	3.9	7.5	3	?	6
TMP1996.062.0030b	1.8	3.1	0.7	?	7
TMP1983.036.0233	4.7	12.3	2.3	?	5.26
TMP1983.036.0242	3.7	8.3	1.6	?	7
TMP1984.092.0268	3.5	5.5	1.5	?	7
TMP1986.023.0090	4	10	1.7	?	7
TMP1988.091.0028	2.9	5.3	1	?	7
TMP1989.076.0063	2.8	5.2	0.9	?	7
TMP1990.106.0006	1.7	4	0.7	?	9.5
TMP1995.157.0029	1.4	2.8	0.7	?	11
TMP1982.024.0078	3.41	4.92	1.3	7.66	6.62
TMP1984.084.0247	3.14	6.13	1.5	?	7.04
TMP1986.023.0105	2.21	4.8	1.16	?	9.26
TMP1987.099.0048	2	5.35	0.99	?	9.46
TMP1987.114.0005	2.83	4.43	1.08	?	7.82
TMP1989.076.0083	2.87	3.35	1.21	8.78	7.3
TMP1986.171.0009	2.11	3.75	1.16	?	7.36
TMP1989.036.0355	3.8	10	2	?	7
TMP1996.039.0026a	2.988	3.901	1.2	8.6	6.3
TMP1994.028.0001	5.28	10.24	2.48	8.7	5.9
TMP1990.082.0015	6.225	11.68	2.6	7.8	6.1
TMP1983.045.0011	4.98	6.557	2.2	8.2	5.6
TMP1983.033.0017	4.399	7.553	2.24	0	4.6
TMP2000.045.0080	6.97	11.9	2.66	6.2	5
TMP2002.045.0049	2.99	4.65	1.25	10	6.3
TMP2002.045.0053	3.4	4.32	1.33	10.5	6.5
TMP2001.045.0082	3.85	8.93	2.24	?	7.5
IMG1486	2.61	4.97	?	8.3	7.36
IMG1655	2.08	3.62	?	9.82	7.66
IMG1657	2.54	4.11	?	10.34	7.62
IMG1486	2.57	4.19	?	12.28	8.08
AMNH5396.3	3.5	6.3	1.53	9.38	6.42
AMNH5450	2.64	6.75	1.43	13.36	11.54
AMNH5529.3	3.79	5.38	1.3	7.72	5.76
AMNH5529.1	3.68	5.5	1.69	8.96	5.26
AMNH5529.1a	3.97	6.17	1.81	7.78	5.06
AMNH5535.3	3.66	5.39	1.45	7.44	5.58
AMNH5553.3	3.73	4.81	1.39	7.44	6.26
AMNH5553.1	3.58	5.23	1.21	9.84	6.12
AMNH5547	3.85	5.35	1.56	?	6.58
AMNH5547.2	2.94	4.86	1.14	?	7.66
AMNH5547.3	3.36	5.45	1.34	?	7.28
AMNH5545	3.98	5.44	?	?	5.44
AMNH5545.2	4.04	5.88	?	?	5.86
DSCN1694	3.88	8.4	?	10.54	6.66
AMNH5749	3.61	6.37	1.55	9.2	6.26
AMNH5688left	3.75	6.97	1.53	9.36	5.7
AMNH5671.3	3.89	7	1.58	?	5.72
AMNH1498right	3.59	5.96	?	9.38	6.08
UCMP128941	3.7	6	?	?	6
UCMP120338	5.5	7.5	?	?	5
UCMP119921	3.7	5.7	?	?	6
UCMP128913	3.8	7	?	?	6
UCMP120153	3	4.8	?	?	5
UCMP120287	5	8	?	?	4.5
UCMP123543	7	6	?	?	4
UCMP123565	4	7	?	?	6
UCMP119718	6	10	?	?	5
UCMP187163	2.5	5	?	?	7
TMP1987.114.0005	2.82	4.23	1.08	0	7.6
UALVP48279	2.4	5.11	1.12	9	7.5
UALVP48287	3.82	7.72	1.58	9	6
UALVP48290	4.65	11.03	2.2	7.25	7
UALVP48291	4.57	11.38	2.2	8	7
UALVP48295	2.36	5.15	1.2	?	7.5
UALVP48312	3.98	11.73	2.44	8	7
UALVP48323	1.92	4	1	12.5	9.5
UALVP48324	3.57	10.68	1.82	6.5	7
UALVP48325	4.48	13.3	2.2	8	7
UALVP48326	3.32	7.8	1.7	11	8
UALVP48327	5.4	14.88	2.96	7	6.5
UALVP48328	2.91	6.64	1.48	?	10
UALVP48329	4.23	10.5	2.24	7.3	6.26
UALVP48330	5.78	14	2.8	?	6.5
UALVP48331	4.81	13.13	2.32	6	5.76
UALVP48343	5.89	15.58	3	7.75	6.5
UALVP48344	3.2	9.45	1.84	11	8
UALVP48345	1.96	4.57	1.12	?	9
UALVP48355	2.8	9.63	1.62	10.75	10
UALVP50136	2.82	7.14	1.34	10	7.6
UALVP50137	2	3.4	1	?	10.5
UALVP50138	4.55	14	2.36	13	6.2
UALVP50139	2.74	7.14	1.28	7.7	7
UALVP50140	2.91	5.98	1.38	?	11
UALVP50141	1.99	4.4	0.96	?	10.5
UALVP50142	3.15	7.47	1.46	7.7	7
UALVP50143	3.24	5.4	1.4	?	8.4
UALVP50144	1.56	2.72	0.8	?	14
UALVP50145	3.07	8.93	1.74	9.6	8.3
UALVP50146	1.83	4.07	0.78	?	11.5
UALVP50147	2.32	3.65	1.1	?	10.2
UALVP50148	2.82	6.39	1.04	?	7.7
UALVP50149	2.57	4.81	1.32	8	8
UALVP50150	3.7	9.5	2	?	8
UALVP50151	3.9	9.2	1.9	?	?
UALVP50152	2.41	3.82	1.08	11.3	7.7
UALVP50153	2.57	5.64	1.56	12	8.9
UALVP50154	5.31	13.21	2.68	9	6.5
UALVP50155	3.57	9.8	1.8	8.8	7.7
UALVP50156	3.49	9.45	1.92	8.6	6.3
UALVP50157	2.91	6.14	1.54	10.3	8.2
UALVP50158	2.12	5.56	1.34	?	9
UALVP50159	1.72	2.72	0.94	?	13
UALVP50160	2.04	2.44	0.9	9.2	8
UALVP50161	3.57	9.28	1.96	9.8	7.4
UALVP50162	2.57	6.14	1.66	12.5	8
UALVP50163	2.66	7.06	1.6	?	?
UALVP50164	3.4	8.75	1.82	8.5	6.5
UALVP48187	2.68	2.68	0.98	?	8
UALVP48207	3.24	7.3	1.2	?	7.5
UALVP48218	3.98	4.48	2.16	8	6.3
UALVP48222	2.44	3	1.04	?	10
UALVP48227	2.04	2.94	0.78	?	8.2
UALVP48228	3.57	7.14	1.84	7.25	7
UALVP48229	3.08	7.14	1.76	?	8.26
UALVP48269	2.64	7.06	1.28	?	7.76
UALVP50199	1.79	4.4	1.04	?	8.7
UALVP50200	1.79	4.4	0.94	?	9
UALVP50201	2.95	6.56	1.74	?	7.3
UALVP50202	1.99	3.98	0.96	9	8.5
UALVP50203	2.41	3.98	1.08	12	9.4
UALVP50204	1.6	3.36	0.9	11.2	10
UALVP50205	2.16	3.6	0.98	?	8
UALVP50206	2.24	3.74	0.94	9.5	9
UALVP50207	1.92	3.28	0.9	?	10.7
UALVP50208	3.9	9.89	2.08	7.7	9.2
UALVP50209	2.4	3	1	?	11.3
UMNH424-17371	3.1	8.27	1.62	11.3	8.1
UMNH424-14403	1.88	5.01	1.12	?	10.8
UMNH424-17220	2.47	6.18	1.39	10.9	?
UMNH424-17220	2.5	5.53	1.35	?	11
TMP1986.159.0062	3.5	7.5	1.5	?	6.5
TMP1990.079.0031	2.8	6.8	1.3	?	8
TMP1995.177.0049a	3.2	8.5	1.2	?	10
TMP1995.180.0005a	1.9	5.2	0.9	?	12
TMP1995.180.0005b	1.7	4.2	0.9	?	0
TMP1996.048.0011	2.5	5	1.3	?	8
TMP1996.062.0030a	3.6	12.5	1.7	?	6
TMP1989.103.0025	3.9	5.4	2.5	?	7.5
TMP1995.177.0079	1.9	3	0.7	?	12
TMP1986.172.0053	1.9	2.9	0.7	?	12
TMP1984.001.0012	4.5	11	2.1	?	6
TMP1986.023.0105	2.3	5.8	1.1	?	8.5
TMP1986.033.0054	2.1	4.5	1.1	?	8
TMP1986.045.0046	2.3	5.5	1.2	?	10
TMP1988.036.0199	3.7	9.5	1.7	?	7
TMP1995.181.0010	3	7.2	1.6	?	7
TMP1996.142.0019	3.1	9.7	1.5	?	7
TMP1987.158.0076	2.4	3.3	0.8	?	10
TMP1984.092.0205	2	2.7	0.7	?	12
TMP1986.021.0068	2	3.7	1	?	12
TMP1995.174.0052	1.8	2.3	0.7	?	12
TMP1995.181.0010c	2.2	3.3	0.8	?	12
TMP1995.181.0060e	1.4	2.4	0.6	?	12
TMP1995.181.0060f	1.9	2.5	0.7	?	12
BB86uncat.	3	6	?	?	9
p741067no1	2.3	5	?	8	4.8
p741067no2	3	6	?	?	4.5
p741067no3	3.3	5	?	7	4
p83331	4.8	7	?	?	4.6
p8219366	3.1	6	1.8	?	4.4
p83368no3	3.6	7	?	?	7
p663182	3.8	7	?	?	4
nmckno23b	5.9	10	?	?	4
hjohnson4	2	4	?	?	5
LSUMG489:6237	2	2.5	0.9	?	10
LSUMG489:6235	1.7	3	0.7	?	11
LSUMG489:6050	1.7	3.5	1	?	10
LSUMG741:5933	1.8	2.3	0.9	?	9
LSUMG113:5939	2	4	1	?	12
UCMP213984	4.4	8.6	1.8	?	6.5
UCMP214012	3.8	7.3	1.8	?	6.5
UCMP187102	2.5	5.2	1.8	?	8.5
UCMP214013	2.5	5.4	1.4	?	8.5
UCMP214016	2.7	3.9	1.2	?	9
UCMP214020	2.7	5	1.4	?	12
UCMP214021	2.9	5.4	1.4	?	10
UCMP214022	3.5	7.2	1.5	?	8
UCMP214023	3.2	6.3	1.4	?	8
UCMP214035	2.2	4	1	?	9
UCMP214039	2.8	6.5	1.6	?	6.5
UCMP214043	3.2	7.3	1.6	?	8
LanceRichardo	4.1	12	?	7	6.5
AMNH5366	4.75	12.36	2.18	7.98	7.08
AMNH5370	4.35	13.5	2.21	7.62	6.32
AMNH5370.2	4.02	13.71	2.12	8.74	6.46
AMNH5376.1	4.98	16.38	2.26	8.3	6.76
AMNH5376.2	4.4	13.86	2.09	7.96	7.34
AMNH5380.1	4.74	15.1	2.29	7.7	6.72
AMNH5380.2	3.85	13.63	2.04	7.04	6.36
AMNH5382.1	5.55	17.2	2.39	7.94	6.02
AMNH5382.2	5.74	16.65	2.53	7.56	6.3
AMNH5386.3	4.24	9.46	1.96	9.3	6.2
AMNH5386.2	3.46	11.26	1.83	?	7.64
AMNH5386.2	4.31	14.37	2.11	7.08	6.28
AMNH5390.2	4.22	9.04	?	9.16	6.84
AMNH5390.3	3.35	9.57	?	14.24	10.44
AMNH5390.1	2.85	5.5	?	9.16	6.18
AMNH5556.1	5.57	17.13	?	7.94	6.82
AMNH5556.2	5.8	16.8	?	7.78	5.76
UCMP186837	3.3	6.7	1.7	?	10.5
UCMP186842	2.7	5.3	1.4	?	8
UCMP186825	3.3	9.1	1.8	?	8
UCMP213927	3.2	6.2	1.5	?	6.5
UCMP213933	3	4.8	1.5	?	8
UCMP213935	2.3	4.4	1.4	?	8
UCMP213951	4.2	13	1.8	?	8
UCMP213953	3.8	8.9	1.7	?	7.5
UCMP213960	3.9	9.1	1.8	?	7.5
UCMP213972	4.1	8.5	2	?	8
UCMP213975	4.4	8.9	2	?	7
UCMP213994	2.9	5.8	1.4	?	10
UCMP213995	3.5	8.6	1.8	?	5.5
UCMP213997	2.9	5.9	1.5	?	10
UCMP186842	2.7	5.9	1.4	?	9
UCMP123525	3.9	7.3	1.5	?	10
UCMP186840	4.4	9.2	2	?	6.5
UCMP213980	2.7	5.2	1.4	?	6.5
NMMNHP-27481	5.21	8.77	2.65	6	5
NMMNHP-25054	3.01	1.38	?	0	5
NMMNHP-27487	2.67	?	1.28	0	4
NMMNHP-27559	5.46	8.57	2.45	8	5
NMMNHP-30001	3.95	7.1	2.07	0	4
NMMNHP-30002	3.42	?	1.6	0	4
NMMNHP-30003	2.88	3.83	1.41	0	4
NMMNHP-30330	3.03	3.64	1.18	0	6
NMMNHP-38027	4.48	?	2.21	?	7
NMMNHP-38425	2.5	?	1.04	0	5.5
NMMNHP-49808	5.8	?	2.5	5.5	4.5
NMMNHP-66896	4.27	9.07	2.25	7	4.5
NMMNHP-07189	?	8.29	3.11	5	5
NMMNHP-30223	4.08	?	2.2	?	6
NMMNHP-30227	2.58	?	1.21	7	5
NMMNHP-30232	4.67	?	2.3	5	4
NMMNHP-33144	4.28	?	1.97	0	4.5
NMMNHP-33145	3.05	?	1.46	6	4
NMMNHP-33146	4.11	?	1.74	?	6
NMMNHP-33473	3.22	6.51	1.66	?	5
NMMNHP-33475	4.59	?	2.06	0	5
NMMNHP-33476	2.52	3.21	1.12	0	5
NMMNHP-33486	5.05	6.66	2.61	?	6
NMMNHP-22578	4.38	8.37	1.88	7	5.5
NMMNHP-26205	4.94	8.65	2.23	6.5	3.5
NMMNHP-32752	4.43	8.92	2.4	4.5	3.5
NMMNHP-68395	3.65	4.15	2.1	6	3.5
NMMNHP-32814	3.33	5.2	1.56	9	5
NMMNHP-33148	3.8	6.48	2.53	3	3
NMMNHP-38410	1.45	?	0.7	0	12.5
NMMNHP-52501	?	?	1.62	0	7
NMMNHP-52503	0.99	1.47	0.19	0	12
NMMNHP-52514	0.87	?	?	0	11
NMMNHP-27495	3.9	?	1.71	0	7
NMMNHP-30004	3.34	4.13	1.42	0	8
NMMNHP-30005	3.36	?	1.33	0	7
NMMNHP-30331	3.36	?	1.62	0	9
NMMNHP-27496	3.69	?	1.64	0	8
NMMNHP-30208	2.87	5	1.4	0	9
NMMNHP-30209	2.24	?	0.81	0	7
NMMNHP-33482	2.94	4.51	1.19	15	7
NMMNHP-32753	3.24	?	1.5	9	7
NMMNHP-37793	2.28	?	0.99	?	8
NMMNHP-32742	2.01	?	1.21	0	13
NMMNHP-46389	2.82	?	1.21	6	6
NMMNHP-68396	5.5	4.78	2.85	3.5	1.75
NMMNHP-22566	5.34	6.83	2.61	0	2
NMMNHP-32772	6.04	8.38	3.27	?	2
NMMNHP-33521	3.26	3.91	1.85	0	2.5
NOTE: We have removed all New Mexico specimens that have 3 or more missing data cells (i.e., We have only included those that can be scored for at least 3/5 of the measurements).
NOTE: Missing data can be included and are filled in by the program (PAST) by average column substitution.
NOTE: Where Larson and Currie leave a blank cell, that cell has been filled by "?". For denticle measurements, a "0" is used if a carina is visible and no denticles are present. If the score is uncertain (because the carina is not visible or well-enough preserved) then a score of "?" is given.

## Sheet: PCA Results
Specimen			PC1	PC2	PC3	PC4	PC5		PC	Eigenvalue	%variance		PC1 Coefficients		PC2 Coefficients		PC3 Coefficients		PC4 Coefficients		PC5 Coefficients
UALVP47980	Milk River Fm.	"Saurornitholestinae"	0.13767	0.041091	-0.55029	-0.030584	-0.44371		1	3.22633	64.527		FABL	-0.5247	FABL	-0.1773	FABL	0.0732	FABL	0.099	FABL	-0.8234
UALVP47981	Milk River Fm.	"Saurornitholestinae"	0.86314	-2.5732	-1.0165	-0.27859	-0.47968		2	0.904273	18.085		CH	-0.4791	CH	-0.354	CH	0.3041	CH	0.5701	CH	0.4771
UALVP47983	Milk River Fm.	"Saurornitholestinae"	0.052445	-1.4052	-0.79119	-0.074526	-0.44772		3	0.53864	10.773		BW	-0.5073	BW	-0.1293	BW	0.1296	BW	-0.7988	BW	0.2666
UALVP47987	Milk River Fm.	"Saurornitholestinae"	2.1307	-0.24027	-0.8705	-0.17446	-0.0081117		4	0.215343	4.3069		ADM	0.2613	ADM	-0.8767	ADM	-0.3917	ADM	-0.09564	ADM	-0.02409
UALVP48029	Milk River Fm.	"Saurornitholestinae"	0.27646	-0.43156	-0.55995	-0.051556	-0.098873		5	0.115418	2.3084		PDM	0.4117	PDM	-0.2408	PDM	0.8555	PDM	-0.1339	PDM	-0.1505
UALVP48030	Milk River Fm.	"Saurornitholestinae"	-0.2696	-0.037957	-0.70073	0.12628	-0.16168
UALVP48031	Milk River Fm.	"Saurornitholestinae"	2.5665	-0.95911	-1.2698	-0.14001	0.033625
UALVP48037	Milk River Fm.	"Saurornitholestinae"	0.76182	-1.063	-0.47807	-0.30307	-0.090961
UALVP48044	Milk River Fm.	"Saurornitholestinae"	1.2647	-0.49016	-0.96607	0.067704	0.28327
UALVP48046	Milk River Fm.	"Saurornitholestinae"	0.75296	0.046318	-0.21135	0.096435	0.025278
UALVP48047	Milk River Fm.	"Saurornitholestinae"	1.3731	0.054451	-0.93161	-0.004435	-0.031253
UALVP48053	Milk River Fm.	"Saurornitholestinae"	0.67736	-0.25573	-0.69834	0.0044233	-0.12006
UALVP48054	Milk River Fm.	"Saurornitholestinae"	1.4972	-0.27561	-0.37418	0.14536	-0.053373
UALVP48059	Milk River Fm.	"Saurornitholestinae"	1.5009	-0.15656	-0.91811	-0.15504	0.11187
UALVP48061	Milk River Fm.	"Saurornitholestinae"	-0.26737	0.16935	-0.38366	0.24892	-0.30366
UALVP48063	Milk River Fm.	"Saurornitholestinae"	1.2914	-0.7345	-0.89995	-0.10259	-0.23482
UALVP48064	Milk River Fm.	"Saurornitholestinae"	-0.14572	-0.0078934	-0.17423	0.36149	-0.10667
UALVP48065	Milk River Fm.	"Saurornitholestinae"	0.66476	-0.22893	-0.72949	-0.10947	-0.27312
UALVP48066	Milk River Fm.	"Saurornitholestinae"	0.36872	-1.844	-0.77428	0.04462	-0.4001
UALVP48067	Milk River Fm.	"Saurornitholestinae"	0.4886	-1.1988	-0.93441	-0.23634	-0.25503
UALVP48068	Milk River Fm.	"Saurornitholestinae"	0.076871	-0.28814	-0.91191	-0.37567	-0.47305
UALVP48070	Milk River Fm.	"Saurornitholestinae"	1.453	-0.24281	-0.91597	0.073806	-0.072688
UALVP48073	Milk River Fm.	"Saurornitholestinae"	1.6376	-1.0783	-0.54865	0.14999	0.015076
UALVP48074	Milk River Fm.	"Saurornitholestinae"	1.2262	-0.21372	-0.49545	0.26514	-0.029218
UALVP48075	Milk River Fm.	"Saurornitholestinae"	1.0695	0.20729	-0.9972	-0.039566	-0.24014
UALVP48076	Milk River Fm.	"Saurornitholestinae"	1.8374	-0.49369	-0.52186	-0.078298	-0.018175
UALVP48077	Milk River Fm.	"Saurornitholestinae"	1.4434	-0.54668	-0.65854	-0.033857	-0.31793
UALVP48078	Milk River Fm.	"Saurornitholestinae"	1.5853	-0.80047	-1.0807	-0.31487	-0.16365
UALVP48080	Milk River Fm.	"Saurornitholestinae"	0.74357	3.2229	0.67012	0.13636	0.043024
UALVP48082	Milk River Fm.	"Saurornitholestinae"	1.0005	-1.0602	-0.94016	-0.16762	0.07465
UALVP48095	Milk River Fm.	"Saurornitholestinae"	0.98838	0.54787	-0.64202	-0.19965	-0.053408
UALVP48118	Milk River Fm.	"Saurornitholestinae"	-0.50892	-0.35099	-0.17084	0.23637	-0.42051
UALVP48126	Milk River Fm.	"Saurornitholestinae"	0.14131	0.087338	-0.070785	-0.13647	0.047645
UALVP48127	Milk River Fm.	"Saurornitholestinae"	0.032692	0.18531	-0.39765	0.064514	-0.17867
UALVP48128	Milk River Fm.	"Saurornitholestinae"	1.1203	-0.50275	-0.99607	0.043295	-0.24021
UALVP48129	Milk River Fm.	"Saurornitholestinae"	1.7157	-0.15679	-0.82019	0.058822	0.0094481
UALVP48135	Milk River Fm.	"Saurornitholestinae"	2.6236	-0.92821	-1.2921	-0.17974	0.049138
UALVP48137	Milk River Fm.	"Saurornitholestinae"	1.766	0.50419	0.059502	-0.023332	-0.063928
UALVP48221	Milk River Fm.	"Saurornitholestinae"	2.6677	-0.85429	-0.26925	-0.18704	-0.16616
UALVP48223	Milk River Fm.	"Saurornitholestinae"	2.4452	-0.077281	0.093068	-0.052654	-0.078013
UALVP48249	Milk River Fm.	"Saurornitholestinae"	2.9074	-0.76349	-0.32565	-0.17924	0.016813
UALVP48466	Milk River Fm.	"Saurornitholestinae"	-0.62443	0.57278	-0.19635	-0.1359	0.08509
UALVP48478	Milk River Fm.	"Saurornitholestinae"	1.376	0.70469	-1.0028	-0.077293	0.10587
UALVP50475	Milk River Fm.	"Saurornitholestinae"	1.7675	0.11477	-0.76356	-0.15828	-0.070376
UALVP50476	Milk River Fm.	"Saurornitholestinae"	1.5304	-0.23159	-0.43676	0.083512	-0.031678
UALVP50477	Milk River Fm.	"Saurornitholestinae"	1.5779	0.5591	-0.21101	0.0041838	0.18675
UALVP50478	Milk River Fm.	"Saurornitholestinae"	1.0528	0.48005	-0.35579	-0.042729	-0.092732
UALVP50479	Milk River Fm.	"Saurornitholestinae"	1.8409	-0.62199	-0.21043	-0.15279	-0.080226
UALVP50480	Milk River Fm.	"Saurornitholestinae"	1.632	0.46385	-0.014012	0.21097	0.21517
UALVP50481	Milk River Fm.	"Saurornitholestinae"	0.56559	-0.49786	-0.46275	0.048645	-0.24814
UALVP50482	Milk River Fm.	"Saurornitholestinae"	1.1113	-0.72084	-0.50038	-0.068309	-0.018056
UALVP50483	Milk River Fm.	"Saurornitholestinae"	-0.31005	-0.0263	-0.21845	0.25557	-0.079995
UALVP50484	Milk River Fm.	"Saurornitholestinae"	1.6726	-0.48601	-0.63764	-0.068478	-0.24244
UALVP50485	Milk River Fm.	"Saurornitholestinae"	0.80631	0.39667	-0.4993	0.10979	-0.075478
UALVP50486	Milk River Fm.	"Saurornitholestinae"	0.964	0.32995	-0.6651	-0.053559	-0.032611
UALVP50487	Milk River Fm.	"Saurornitholestinae"	2.2851	-0.71871	-0.83454	-0.16865	-0.13033
UALVP50488	Milk River Fm.	"Saurornitholestinae"	1.4759	-0.44373	-0.64187	-0.12007	0.079553
UALVP50489	Milk River Fm.	"Saurornitholestinae"	0.99841	-0.5163	-0.80974	-0.048222	-0.015222
UALVP50490	Milk River Fm.	"Saurornitholestinae"	-0.31658	0.13417	-0.48007	-0.10228	-0.31552
UALVP50491	Milk River Fm.	"Saurornitholestinae"	1.1909	-1.1608	-0.9789	0.080594	-0.13752
UALVP50492	Milk River Fm.	"Saurornitholestinae"	0.68283	-0.29587	-0.57316	-0.12558	-0.1194
UALVP50493	Milk River Fm.	"Saurornitholestinae"	1.1759	0.3944	-0.14332	0.12718	0.22967
UALVP50494	Milk River Fm.	"Saurornitholestinae"	1.4048	-1.6942	-0.96721	-0.17037	0.081427
UALVP50495	Milk River Fm.	"Saurornitholestinae"	1.4671	-1.1525	-1.1432	-0.024167	0.065919
UALVP50496	Milk River Fm.	"Saurornitholestinae"	0.24869	-0.60133	-0.38472	0.33257	-0.4566
UALVP50497	Milk River Fm.	"Saurornitholestinae"	0.42183	-0.41117	-0.45865	-0.22864	-0.20818
UALVP50498	Milk River Fm.	"Saurornitholestinae"	1.3053	-0.19779	-0.95449	-0.09236	-0.16687
UALVP50499	Milk River Fm.	"Saurornitholestinae"	-0.067707	-0.29137	-0.42205	0.0014068	-0.226
UALVP50500	Milk River Fm.	"Saurornitholestinae"	0.61033	-1.4171	-1.1292	0.020034	-0.0025546
UALVP50501	Milk River Fm.	"Saurornitholestinae"	1.7772	-0.41926	-0.72589	-0.11398	0.079731
UALVP50502	Milk River Fm.	"Saurornitholestinae"	2.0501	-0.56425	-1.0265	-0.039152	-0.11333
UALVP50503	Milk River Fm.	"Saurornitholestinae"	-0.037195	-0.0018741	-0.10604	0.35808	-0.032612
UALVP50504	Milk River Fm.	"Saurornitholestinae"	1.036	-0.81293	-0.57182	-0.023389	-0.22074
UALVP50505	Milk River Fm.	"Saurornitholestinae"	-0.34288	-0.58767	-0.61285	-0.03281	-0.35098
UALVP50506	Milk River Fm.	"Saurornitholestinae"	-0.028275	-0.59151	-0.14916	0.32746	-0.18839
UALVP50507	Milk River Fm.	"Saurornitholestinae"	-0.31614	0.099113	-0.17431	-0.087722	-0.34466
UALVP50508	Milk River Fm.	"Saurornitholestinae"	1.488	0.59316	-0.92299	-0.0050893	0.074304
UALVP50509	Milk River Fm.	"Saurornitholestinae"	1.0842	0.32995	0.0011984	-0.12196	0.2195
UALVP50510	Milk River Fm.	"Saurornitholestinae"	1.4097	0.59478	-0.38632	-0.08297	0.26019
UALVP50511	Milk River Fm.	"Saurornitholestinae"	1.0481	0.19192	-0.53887	0.17825	0.32566
UALVP50512	Milk River Fm.	"Saurornitholestinae"	1.3303	0.58568	-0.43745	-0.020908	0.31563
UALVP50513	Milk River Fm.	"Saurornitholestinae"	1.4961	-0.22296	-0.42048	-0.1224	-0.16564
UALVP50514	Milk River Fm.	"Saurornitholestinae"	1.5636	-1.2984	-1.1732	-0.12818	-0.11822
UALVP50515	Milk River Fm.	"Saurornitholestinae"	0.68852	-0.38618	-0.63517	0.045397	-0.16205
UALVP50516	Milk River Fm.	"Saurornitholestinae"	2.2186	-0.12653	0.05605	-0.025518	-0.24975
UALVP50517	Milk River Fm.	"Saurornitholestinae"	1.7126	0.56831	-0.12335	0.022288	-0.18511
UALVP50518	Milk River Fm.	"Saurornitholestinae"	1.8115	-0.20033	-0.61612	-0.06311	-0.20205
UALVP50519	Milk River Fm.	"Saurornitholestinae"	2.5227	-1.1999	-1.4665	-0.052112	0.008441
UALVP50520	Milk River Fm.	"Saurornitholestinae"	0.79453	-0.68254	-0.60603	0.13503	-0.21776
UALVP50521	Milk River Fm.	"Saurornitholestinae"	1.1147	-0.10268	-0.6485	0.068535	-0.15003
UALVP50522	Milk River Fm.	"Saurornitholestinae"	0.41039	-0.73382	-0.91676	-0.075728	-0.34979
UALVP50523	Milk River Fm.	"Saurornitholestinae"	-0.080567	-0.74208	-0.37668	0.19785	-0.36265
UALVP50524	Milk River Fm.	"Saurornitholestinae"	0.025381	-0.37701	-0.51856	-0.0082471	-0.072423
UALVP50525	Milk River Fm.	"Saurornitholestinae"	0.56294	0.32479	-0.37377	0.05871	0.13277
UALVP50526	Milk River Fm.	"Saurornitholestinae"	1.8354	-1.3184	-0.97372	-0.019236	-0.11743
UALVP50527	Milk River Fm.	"Saurornitholestinae"	2.1145	-0.88905	-0.63398	0.072908	-0.0033756
UALVP50528	Milk River Fm.	"Saurornitholestinae"	0.27449	0.11351	-0.062261	-0.044064	0.034355
UALVP50529	Milk River Fm.	"Saurornitholestinae"	-0.28823	-0.15183	-0.45631	0.11198	-0.13795
UALVP50530	Milk River Fm.	"Saurornitholestinae"	0.31391	-0.5336	-0.44595	0.077548	-0.2058
UALVP50531	Milk River Fm.	"Saurornitholestinae"	-0.39983	-0.2987	-0.04902	0.37106	0.064813
UALVP50532	Milk River Fm.	"Saurornitholestinae"	-0.34785	-0.016362	-0.44036	0.12291	-0.43678
UALVP50533	Milk River Fm.	"Saurornitholestinae"	-0.086599	0.065313	-0.25507	0.23686	-0.10876
UALVP50534	Milk River Fm.	"Saurornitholestinae"	0.062257	-0.3822	-0.41128	0.18315	-0.1276
UALVP50535	Milk River Fm.	"Saurornitholestinae"	-0.039361	0.094796	-0.26063	0.097305	-0.23599
UALVP50536	Milk River Fm.	"Saurornitholestinae"	0.44525	-0.236	-0.57378	0.09451	-0.1587
UALVP50537	Milk River Fm.	"Saurornitholestinae"	1.3813	0.62584	-0.39881	-0.32162	-0.027728
UALVP50538	Milk River Fm.	"Saurornitholestinae"	0.34505	0.099298	-0.10235	0.48999	-0.1511
UALVP50539	Milk River Fm.	"Saurornitholestinae"	0.62636	0.21627	-0.12017	0.23279	-0.045
UALVP50540	Milk River Fm.	"Saurornitholestinae"	0.83145	0.32317	-0.25186	0.30772	0.13348
UALVP50541	Milk River Fm.	"Saurornitholestinae"	0.13114	0.035261	-0.76069	-0.13173	-0.19962
UALVP50542	Milk River Fm.	"Saurornitholestinae"	1.7644	-0.34633	-0.67158	-0.052582	-0.1198
UALVP50543	Milk River Fm.	"Saurornitholestinae"	1.9516	-0.55425	-1.1414	0.015257	0.10698
UALVP50544	Milk River Fm.	"Saurornitholestinae"	1.3276	-0.035387	-0.71346	-0.17382	-0.13089
UALVP50545	Milk River Fm.	"Saurornitholestinae"	1.894	-0.54306	-0.75284	0.070094	-0.021775
UALVP50546	Milk River Fm.	"Saurornitholestinae"	2.066	0.40243	0.46471	0.0093345	0.17436
UALVP50547	Milk River Fm.	"Saurornitholestinae"	1.7777	0.0020453	-0.71167	-0.23965	-0.098608
UALVP50548	Milk River Fm.	"Saurornitholestinae"	1.8379	0.4763	0.22832	-0.23177	-0.18726
UALVP50549	Milk River Fm.	"Saurornitholestinae"	0.08541	0.23661	-0.46732	0.071249	-0.36755
UALVP50550	Milk River Fm.	"Saurornitholestinae"	-0.10193	-0.22564	-0.43629	0.029056	-0.077437
UALVP50551	Milk River Fm.	"Saurornitholestinae"	1.3069	-0.52549	-0.82617	0.071499	-0.26225
UALVP50552	Milk River Fm.	"Saurornitholestinae"	1.9747	-0.58635	-0.79736	-0.069956	-0.011159
UALVP50553	Milk River Fm.	"Saurornitholestinae"	1.8673	-0.62911	-0.44273	0.0032112	-0.097381
UALVP50554	Milk River Fm.	"Saurornitholestinae"	1.1635	-0.50125	-0.63962	-0.15441	-0.18666
UALVP50555	Milk River Fm.	"Saurornitholestinae"	1.684	-0.49418	-0.67284	0.10887	0.0479
UALVP50556	Milk River Fm.	"Saurornitholestinae"	-0.076346	-1.1554	-0.36732	0.27335	-0.60948
UALVP50557	Milk River Fm.	"Saurornitholestinae"	1.9853	-1.4842	-1.0593	-0.064326	-0.19026
UALVP50558	Milk River Fm.	"Saurornitholestinae"	0.42636	0.17749	-0.1573	0.21247	-0.11914
UALVP50559	Milk River Fm.	"Saurornitholestinae"	0.33527	-1.2527	-0.95889	-0.092711	-0.13063
UALVP50560	Milk River Fm.	"Saurornitholestinae"	0.53562	-0.67656	-0.45835	0.14506	-0.10508
UALVP50561	Milk River Fm.	"Saurornitholestinae"	0.34835	0.22962	-0.25649	-0.071114	-0.12357
UALVP50562	Milk River Fm.	"Saurornitholestinae"	0.74322	-0.86731	-0.92266	-0.27661	-0.28826
UALVP50563	Milk River Fm.	"Saurornitholestinae"	0.6319	0.25191	-0.16379	0.057525	0.12304
UALVP50564	Milk River Fm.	"Saurornitholestinae"	0.51466	0.031033	-0.90582	0.14851	-0.2181
UALVP50565	Milk River Fm.	"Saurornitholestinae"	0.15547	-0.45692	-0.55952	-0.086862	-0.3554
UALVP50566	Milk River Fm.	"Saurornitholestinae"	0.36594	0.2373	-0.28397	-0.013742	0.0068782
UALVP50567	Milk River Fm.	"Saurornitholestinae"	0.29692	-0.32502	-0.42282	-0.072317	-0.32119
UALVP50568	Milk River Fm.	"Saurornitholestinae"	0.29409	-1.4437	-0.54876	-0.14255	-0.098139
UALVP50569	Milk River Fm.	"Saurornitholestinae"	0.16265	0.17406	-0.35933	0.30982	0.04338
UALVP50570	Milk River Fm.	"Saurornitholestinae"	1.214	-0.42138	-1.0542	-0.21463	-0.2148
UALVP50571	Milk River Fm.	"Saurornitholestinae"	1.2999	-1.4561	-1.0598	0.15098	-0.19115
UALVP50572	Milk River Fm.	"Saurornitholestinae"	1.4117	-0.39984	-0.51298	0.20636	-0.026129
UALVP50573	Milk River Fm.	"Saurornitholestinae"	0.56988	-0.046986	-0.63667	-0.056347	-0.34338
UALVP50574	Milk River Fm.	"Saurornitholestinae"	0.69463	-0.19268	-0.7551	-0.25789	-0.2629
UALVP50575	Milk River Fm.	"Saurornitholestinae"	0.59154	0.48549	-0.70945	0.053886	-0.13834
UALVP50576	Milk River Fm.	"Saurornitholestinae"	2.0214	0.65402	-0.049139	-0.26885	-0.0040753
UALVP50577	Milk River Fm.	"Saurornitholestinae"	2.0706	-0.029901	-0.2494	-0.11461	-0.050779
UALVP50578	Milk River Fm.	"Saurornitholestinae"	0.6001	-0.99137	-0.30015	0.21418	-0.096846
UALVP50579	Milk River Fm.	"Saurornitholestinae"	2.2094	-0.87615	-0.5413	-0.18903	0.089798
UALVP50580	Milk River Fm.	"Saurornitholestinae"	1.7518	0.39142	0.2875	0.078723	-0.22675
UALVP50581	Milk River Fm.	"Saurornitholestinae"	0.81865	-1.088	-0.47759	0.12586	-0.27437
UALVP50582	Milk River Fm.	"Saurornitholestinae"	1.0141	0.40182	-0.30254	0.35964	-0.12881
UALVP50583	Milk River Fm.	"Saurornitholestinae"	2.4408	-2.7697	-1.798	-0.41295	-0.17245
UALVP50584	Milk River Fm.	"Saurornitholestinae"	0.13192	0.2883	-0.29411	0.31517	-0.15939
UALVP50585	Milk River Fm.	"Saurornitholestinae"	0.52393	0.22026	-0.16943	0.072751	0.13465
UALVP50586	Milk River Fm.	"Saurornitholestinae"	2.828	-0.59864	-0.76383	-0.1088	0.0014715
UALVP50587	Milk River Fm.	"Saurornitholestinae"	1.3364	0.49575	-0.17926	-0.24068	0.32768
UALVP50588	Milk River Fm.	"Saurornitholestinae"	1.6566	0.094945	-0.47853	-0.053292	-0.02285
UALVP50589	Milk River Fm.	"Saurornitholestinae"	-0.64931	0.5402	-0.13358	-0.084726	-0.22336
UALVP50590	Milk River Fm.	"Saurornitholestinae"	-0.7029	0.17191	-0.30212	0.10757	-0.30597
UALVP50591	Milk River Fm.	"Saurornitholestinae"	0.43241	0.11485	-0.51996	-0.058362	-0.31316
UALVP50592	Milk River Fm.	"Saurornitholestinae"	0.21593	0.12714	-0.19505	0.20176	0.086484
UALVP50593	Milk River Fm.	"Saurornitholestinae"	0.31231	-0.35732	-0.50303	0.0066299	0.15206
UALVP50594	Milk River Fm.	"Saurornitholestinae"	0.57611	0.5457	-0.52507	0.1253	-0.19817
UALVP50595	Milk River Fm.	"Saurornitholestinae"	1.6633	-0.049056	-1.3054	-0.027354	0.031521
UALVP50596	Milk River Fm.	"Saurornitholestinae"	0.73136	0.98536	-0.55983	-0.054816	-0.21232
UALVP50597	Milk River Fm.	"Saurornitholestinae"	1.8524	-0.8986	-1.6202	-0.27438	0.036273
UALVP50598	Milk River Fm.	"Saurornitholestinae"	0.37124	-0.51764	-0.33079	0.12576	-0.36859
UALVP50599	Milk River Fm.	"Saurornitholestinae"	1.0325	-0.080629	-0.51144	0.030281	-0.20098
UALVP50600	Milk River Fm.	"Saurornitholestinae"	2.079	-1.3714	-1.2047	-0.25129	-0.17078
UALVP50601	Milk River Fm.	"Saurornitholestinae"	2.1593	-1.1378	-1.1378	-0.13476	-0.048105
UALVP50602	Milk River Fm.	"Saurornitholestinae"	1.9901	-0.74812	-0.97285	-0.11827	-0.21176
UALVP50603	Milk River Fm.	"Saurornitholestinae"	2.6149	-1.5665	-1.4687	-0.19049	0.052632
UALVP50604	Milk River Fm.	"Saurornitholestinae"	-0.068684	-0.29492	-0.37761	-0.08169	-0.50019
UALVP50605	Milk River Fm.	"Saurornitholestinae"	1.4683	-0.096643	-0.50061	-0.13765	0.0201
UALVP50606	Milk River Fm.	"Saurornitholestinae"	0.6667	0.22519	-0.062213	0.11931	-0.42417
UALVP50607	Milk River Fm.	"Saurornitholestinae"	1.2509	-0.46034	-0.98926	-0.042042	-0.13805
UALVP50608	Milk River Fm.	"Saurornitholestinae"	1.7809	-0.33876	-0.70466	0.043096	-0.058041
UALVP50609	Milk River Fm.	"Saurornitholestinae"	2.0675	0.5723	0.060285	0.094006	0.24987
UALVP50610	Milk River Fm.	"Saurornitholestinae"	0.26796	-0.10055	-0.71602	-0.073291	-0.3119
UALVP50611	Milk River Fm.	"Saurornitholestinae"	-0.41206	0.018764	-0.099918	0.44508	0.073967
UALVP50612	Milk River Fm.	"Saurornitholestinae"	0.69084	-0.3347	-0.81161	-0.17087	-0.14279
UALVP50613	Milk River Fm.	"Saurornitholestinae"	0.8538	0.53966	-0.59479	-0.12539	-0.20596
UALVP50614	Milk River Fm.	"Saurornitholestinae"	0.49231	-0.27461	-0.53116	-0.057108	-0.19481
UALVP50615	Milk River Fm.	"Saurornitholestinae"	-0.065629	-0.52473	-0.54649	-0.094185	-0.46917
CMNFV8725	Milk River Fm.	"Saurornitholestinae"	-1.1305	0.15963	-0.019051	-0.18731	-0.49035
UALVP48052	Milk River Fm.	"Saurornitholestinae"	1.144	-0.70049	-0.49196	-0.27198	0.26788
UALVP48081	Milk River Fm.	"Saurornitholestinae"	0.70313	0.12876	-0.41967	0.028175	0.14324
UALVP50626	Milk River Fm.	"Saurornitholestinae"	0.49154	0.025508	-0.35287	0.1121	0.18564
UALVP50627	Milk River Fm.	"Saurornitholestinae"	0.98132	0.55325	-0.56529	-0.15328	0.31354
UALVP50628	Milk River Fm.	"Saurornitholestinae"	0.59877	0.27447	-0.3867	-0.12324	0.097752
UALVP50629	Milk River Fm.	"Saurornitholestinae"	0.36501	0.25684	-0.3095	-0.15305	0.25378
TMP1995.177.0048c	Oldman Formation	"Saurornitholestinae"	1.9227	0.53494	0.043296	0.15742	0.062305
TMP1995.180.0004	Oldman Formation	"Saurornitholestinae"	1.6585	0.77483	-0.75682	0.49232	0.14812
TMP1995.092.0027	Oldman Formation	"Saurornitholestinae"	0.44861	0.31455	-0.53018	0.39955	0.45544
TMP1987.154.0063	Oldman Formation	"Saurornitholestinae"	-0.35236	0.020116	-0.37153	0.24004	0.53409
TMP1987.154.0064	Oldman Formation	"Saurornitholestinae"	-0.70798	-0.16124	-0.18236	0.24892	0.1642
TMP1987.079.0090	Oldman Formation	"Saurornitholestinae"	-0.80988	-0.11452	-0.38278	0.39065	0.054936
TMP1995.177.0048a	Oldman Formation	"Saurornitholestinae"	0.32984	0.39489	-0.74963	0.25264	0.39497
TMP1995.177.0048b	Oldman Formation	"Saurornitholestinae"	1.4624	0.56819	-0.41449	0.36105	0.49554
TMP1995.092.0016	Oldman Formation	"Saurornitholestinae"	-1.7866	-0.66098	0.06151	0.82477	0.39661
TMP1995.092.0016	Oldman Formation	"Saurornitholestinae"	-1.8376	-0.82252	0.34766	0.96637	0.50638
TMP1987.153.0055	Oldman Formation	"Saurornitholestinae"	-2.5028	-0.83784	0.17611	0.11943	-0.00031639
TMP1987.077.0120	Oldman Formation	"Saurornitholestinae"	-2.388	-0.69981	0.027902	-0.32635	0.40179
TMP1995.092.0054	Oldman Formation	"Saurornitholestinae"	-3.0895	-1.0837	0.34398	0.15542	-0.2894
TMP1995.092.0028	Oldman Formation	"Saurornitholestinae"	1.228	0.56307	-0.56052	0.35177	0.55025
TMP1987.062.0087	Oldman Formation	"Saurornitholestinae"	-1.319	-0.37026	-0.15403	0.30836	0.44488
TMP1988.121.0039	Oldman Formation	"Saurornitholestinae"	-1.4353	-0.1229	-0.15308	0.15227	-0.12469
TMP2003.012.0083	Oldman Formation	"Saurornitholestinae"	-1.0783	-0.23261	0.22149	-0.30964	-0.23646
TMP2000.057.0080	Oldman Formation	"Saurornitholestinae"	-0.75307	-0.022314	-0.45749	-0.086451	0.42495
TMP2002.079.0004	Oldman Formation	"Saurornitholestinae"	-1.3498	-0.076335	-0.21486	0.31466	-0.15888
TMP2002.079.0003	Oldman Formation	"Saurornitholestinae"	-1.1899	-0.29694	0.22361	0.27408	-0.34248
TMP1974.010.0001	Dinosaur Park Formation	"Saurornitholestinae"	-0.98687	-0.15857	-0.33105	-0.015101	0.29638
TMP1974.010.0001	Dinosaur Park Formation	"Saurornitholestinae"	-0.49777	-0.3025	-0.39346	0.11227	0.18883
TMP1987.158.0078	Dinosaur Park Formation	"Saurornitholestinae"	1.3773	0.40091	-0.01634	0.16946	-0.055221
TMP1987.019.0068	Dinosaur Park Formation	"Saurornitholestinae"	1.5352	0.51223	-0.22437	0.32008	0.39156
TMP1987.031.0054	Dinosaur Park Formation	"Saurornitholestinae"	1.2093	0.48202	-0.36481	0.31356	0.26572
TMP1987.004.0047	Dinosaur Park Formation	"Saurornitholestinae"	1.9106	0.47995	0.080671	0.48048	0.042302
TMP1987.048.0077	Dinosaur Park Formation	"Saurornitholestinae"	-0.3087	-0.023776	-0.18115	0.22942	-0.44878
TMP1995.127.0025c	Dinosaur Park Formation	"Saurornitholestinae"	-0.19361	0.14976	-0.50113	0.11715	0.13368
TMP1995.147.0026	Dinosaur Park Formation	"Saurornitholestinae"	2.1109	0.70932	-0.24778	0.26729	0.055495
TMP1995.151.0010	Dinosaur Park Formation	"Saurornitholestinae"	1.651	0.50046	-0.090427	0.29384	0.0023413
TMP1995.181.0011	Dinosaur Park Formation	"Saurornitholestinae"	1.3255	0.59085	-0.58134	0.44309	0.57294
TMP1996.012.0366	Dinosaur Park Formation	"Saurornitholestinae"	-0.078791	0.15309	-0.46371	0.36038	-0.31603
TMP1987.158.0080	Dinosaur Park Formation	"Saurornitholestinae"	-0.65894	-0.13566	-0.26433	0.42816	0.38674
TMP1987.158.0081	Dinosaur Park Formation	"Saurornitholestinae"	-1.0401	-0.51632	0.26472	0.68963	0.46333
TMP1987.033.0055	Dinosaur Park Formation	"Saurornitholestinae"	-0.99557	-0.2481	-0.24221	0.40889	0.54343
TMP1987.036.0392	Dinosaur Park Formation	"Saurornitholestinae"	-2.0354	-0.77402	0.13201	0.94408	0.19168
TMP1987.051.0023	Dinosaur Park Formation	"Saurornitholestinae"	-0.056553	-0.041036	-0.13056	0.72816	0.11215
TMP1987.072.0023	Dinosaur Park Formation	"Saurornitholestinae"	-1.3321	-0.33924	-0.20954	0.31922	0.034482
TMP1987.072.0026	Dinosaur Park Formation	"Saurornitholestinae"	-1.9211	-0.73025	0.12329	0.8128	0.5013
TMP1987.072.0004	Dinosaur Park Formation	"Saurornitholestinae"	-2.1867	-0.80968	0.17477	0.64346	0.34516
TMP1995.012.0109	Dinosaur Park Formation	"Saurornitholestinae"	-2.5966	-0.88953	0.14988	0.39801	0.18344
TMP1995.126.0029	Dinosaur Park Formation	"Saurornitholestinae"	-1.465	-0.70113	0.38849	0.77588	0.22352
TMP1995.127.0025a	Dinosaur Park Formation	"Saurornitholestinae"	-1.8067	-0.66519	0.12512	0.61112	0.14528
TMP1995.127.0025b	Dinosaur Park Formation	"Saurornitholestinae"	-0.54144	-0.11787	-0.16642	0.32923	-0.18523
TMP1995.127.0025d	Dinosaur Park Formation	"Saurornitholestinae"	-0.47027	0.047889	-0.51618	0.40127	-0.043665
TMP1995.129.0002	Dinosaur Park Formation	"Saurornitholestinae"	-1.3321	-0.33924	-0.20954	0.31922	0.034482
TMP1995.131.0012	Dinosaur Park Formation	"Saurornitholestinae"	-1.326	-0.33655	-0.22476	0.41332	-0.12338
TMP1995.137.0002a	Dinosaur Park Formation	"Saurornitholestinae"	-1.3717	-0.32429	-0.22543	0.15908	-0.045791
TMP1995.137.0002b	Dinosaur Park Formation	"Saurornitholestinae"	-1.3999	-0.41953	-0.14284	0.57203	0.13136
TMP1995.179.0003	Dinosaur Park Formation	"Saurornitholestinae"	-1.3304	-0.42821	-0.048784	0.42831	0.24333
TMP1995.019.0004	Dinosaur Park Formation	"Saurornitholestinae"	-0.32457	-0.028519	-0.30771	0.65283	-0.071281
TMP1995.002.0018	Dinosaur Park Formation	"Saurornitholestinae"	-1.4486	-0.37214	-0.21092	0.14869	0.66694
TMP1995.406.0005	Dinosaur Park Formation	"Saurornitholestinae"	-1.0511	-0.46788	0.20182	0.56144	0.11223
TMP1996.012.0361	Dinosaur Park Formation	"Saurornitholestinae"	-2.4877	-0.90103	0.23117	0.48078	0.13364
TMP1996.012.0363	Dinosaur Park Formation	"Saurornitholestinae"	-1.1145	-0.25286	-0.28296	0.43972	-0.03312
TMP1996.012.0038	Dinosaur Park Formation	"Saurornitholestinae"	-1.4569	-0.681	0.36588	0.73093	0.12495
TMP1987.036.0011	Dinosaur Park Formation	"Saurornitholestinae"	-1.3009	-0.31258	-0.20662	0.079407	0.30702
TMP1987.043.0005	Dinosaur Park Formation	"Saurornitholestinae"	-1.6899	-0.64443	0.15516	0.71529	-0.24514
TMP1987.046.0053	Dinosaur Park Formation	"Saurornitholestinae"	-1.2678	-0.30595	-0.23282	0.27815	0.061072
TMP1996.012.0102	Dinosaur Park Formation	"Saurornitholestinae"	-2.2103	-0.84976	0.51452	-0.40631	0.19112
TMP1996.012.0104	Dinosaur Park Formation	"Saurornitholestinae"	-2.0015	-0.61436	-0.0013821	0.18032	-0.049643
TMP1996.012.0112	Dinosaur Park Formation	"Saurornitholestinae"	-3.7362	-1.4485	0.52365	1.0473	-0.49232
TMP1996.012.0115	Dinosaur Park Formation	"Saurornitholestinae"	-2.4443	-0.98751	0.40043	0.61096	0.48204
TMP1996.012.0118	Dinosaur Park Formation	"Saurornitholestinae"	-1.0353	-0.46313	0.32838	0.13802	-0.26528
TMP1996.012.0034	Dinosaur Park Formation	"Saurornitholestinae"	-2.6487	-0.91744	0.14271	0.62727	-0.15888
TMP1996.012.0360	Dinosaur Park Formation	"Saurornitholestinae"	-1.0472	-0.26684	-0.21017	0.5014	-0.22248
TMP1996.012.0364	Dinosaur Park Formation	"Saurornitholestinae"	-1.3242	-0.30698	-0.2608	0.34062	-0.30613
TMP1995.182.0021	Dinosaur Park Formation	"Saurornitholestinae"	-0.23769	0.12068	-0.54147	0.37187	0.35842
TMP1995.184.0023	Dinosaur Park Formation	"Saurornitholestinae"	-0.53392	-0.0096704	-0.4356	0.30963	0.41383
TMP1995.021.0005	Dinosaur Park Formation	"Saurornitholestinae"	-1.3749	-0.27702	-0.3215	0.056329	0.17016
TMP1987.112.0010	Dinosaur Park Formation	"Saurornitholestinae"	-0.066213	-0.2356	0.33586	0.55734	0.18112
TMP1987.112.0021	Dinosaur Park Formation	"Saurornitholestinae"	-0.46388	-0.025359	-0.31349	0.53637	-1.1412
TMP1987.112.0009	Dinosaur Park Formation	"Saurornitholestinae"	-0.69692	-0.09115	-0.31625	0.19532	0.12371
TMP1987.112.0028	Dinosaur Park Formation	"Saurornitholestinae"	-1.7717	-0.64113	0.091548	0.67081	-0.041378
TMP1987.050.0100	Dinosaur Park Formation	"Saurornitholestinae"	-1.1887	-0.25281	-0.22606	0.083131	-0.35033
TMP1987.036.0184	Dinosaur Park Formation	"Saurornitholestinae"	-0.30091	0.072289	-0.42167	0.14348	0.39232
TMP1987.036.0418	Dinosaur Park Formation	"Saurornitholestinae"	-1.1906	-0.35131	-0.00015411	-0.17363	0.55975
TMP1987.036.0070	Dinosaur Park Formation	"Saurornitholestinae"	-1.1597	-0.26488	-0.22632	0.052773	0.52855
TMP1987.036.0093	Dinosaur Park Formation	"Saurornitholestinae"	-1.8377	-0.75163	0.35129	0.38472	0.17648
TMP1995.012.0031	Dinosaur Park Formation	"Saurornitholestinae"	-1.6219	-0.47904	-0.09024	0.28473	0.17407
TMP1995.012.0033	Dinosaur Park Formation	"Saurornitholestinae"	-2.3676	-0.7948	-0.021856	0.90982	-0.018337
TMP1995.012.0038	Dinosaur Park Formation	"Saurornitholestinae"	-1.8636	-0.55685	-0.13887	0.62855	-0.18993
TMP1995.012.0040	Dinosaur Park Formation	"Saurornitholestinae"	-0.50005	0.079092	-0.57263	0.12753	0.50241
TMP1995.012.0042	Dinosaur Park Formation	"Saurornitholestinae"	0.15435	0.20162	-0.43169	0.19827	0.57014
TMP1995.012.0043	Dinosaur Park Formation	"Saurornitholestinae"	-1.7765	-0.62342	0.031519	0.64077	0.35733
TMP1995.012.0074a	Dinosaur Park Formation	"Saurornitholestinae"	-1.6138	-0.45891	-0.11285	0.23978	0.075495
TMP1995.012.0074b	Dinosaur Park Formation	"Saurornitholestinae"	0.00015169	0.18494	-0.46751	0.23576	-0.061797
TMP1995.012.0074c	Dinosaur Park Formation	"Saurornitholestinae"	-1.0693	-0.45466	0.25805	0.20873	-0.07982
TMP1995.124.0004	Dinosaur Park Formation	"Saurornitholestinae"	0.20652	0.29846	-0.61439	0.29846	0.18513
TMP1987.036.0068	Dinosaur Park Formation	"Saurornitholestinae"	-1.8766	-0.69201	0.20284	0.42133	-0.14704
TMP1987.050.0038	Dinosaur Park Formation	"Saurornitholestinae"	-2.6156	-1.0293	0.31331	1.0078	-0.013228
p74105no1	Dinosaur Park Formation	"Saurornitholestinae"	-0.60381	-0.33282	-0.37879	0.47876	0.30829
p74105no2	Dinosaur Park Formation	"Saurornitholestinae"	-0.50852	-0.2946	-0.5785	0.31699	0.12046
p8016440	Dinosaur Park Formation	"Saurornitholestinae"	-1.2889	-0.28605	-0.16144	0.22094	-0.17539
p848946	Dinosaur Park Formation	"Saurornitholestinae"	-0.074158	0.545	-0.66285	-0.17432	-0.076961
p8120259	Dinosaur Park Formation	"Saurornitholestinae"	0.45117	3.0876	0.90559	-0.48951	0.4492
p8216249	Dinosaur Park Formation	"Saurornitholestinae"	-0.34084	-0.52588	-0.80085	0.12399	-0.14291
p84989	Dinosaur Park Formation	"Saurornitholestinae"	-0.98746	-0.27208	-0.063808	0.55337	-0.32181
p8220173	Dinosaur Park Formation	"Saurornitholestinae"	0.676	-0.67137	-0.83025	-0.4037	0.15455
p80161515	Dinosaur Park Formation	"Saurornitholestinae"	-1.6532	0.11942	0.1576	0.86301	-0.57844
p808234	Dinosaur Park Formation	"Saurornitholestinae"	-1.3342	0.31969	-0.04146	0.6632	-0.37642
IrvineSaurornitholestes1	Dinosaur Park Formation	"Saurornitholestinae"	-1.1286	-0.22024	0.014952	0.66697	-0.26319
IrvineSaurornitholestes2	Dinosaur Park Formation	"Saurornitholestinae"	-1.5223	-0.56046	0.029878	0.94425	-0.35367
IrvineSaurornitholestes3	Dinosaur Park Formation	"Saurornitholestinae"	-0.80311	0.035756	-0.077412	0.3129	-0.53569
TMP2005.049.0096	Dinosaur Park Formation	"Saurornitholestinae"	-1.1129	-0.25694	-0.58154	-0.03704	-0.027244
TMP2005.049.0119	Dinosaur Park Formation	"Saurornitholestinae"	-2.1527	-0.54118	0.41652	0.46365	-0.2082
TMP2005.049.0120	Dinosaur Park Formation	"Saurornitholestinae"	-1.77	-0.83378	0.62948	0.28311	-0.22032
TMP2005.049.0074	Dinosaur Park Formation	"Saurornitholestinae"	-1.1868	-0.3024	-0.12425	-0.047559	0.33856
TMP2005.049.0023	Dinosaur Park Formation	"Saurornitholestinae"	-1.5092	0.12224	-0.14565	-0.02104	0.020939
TMP2005.039.0007	Dinosaur Park Formation	"Saurornitholestinae"	-0.49877	-0.21431	-0.46605	0.035328	-0.057595
TMP2005.039.0001	Dinosaur Park Formation	"Saurornitholestinae"	-1.9299	0.0029547	0.087681	0.44908	0.089751
TMP2005.012.0028	Dinosaur Park Formation	"Saurornitholestinae"	-0.10632	0.21763	-0.53312	-0.064158	-0.14906
TMP2005.009.0047	Dinosaur Park Formation	"Saurornitholestinae"	-1.9727	-0.60277	0.023462	-0.012663	0.20259
TMP2004.116.0026	Dinosaur Park Formation	"Saurornitholestinae"	-2.1577	-0.75826	0.1989	0.24163	-0.0082684
TMP2004.103.0017	Dinosaur Park Formation	"Saurornitholestinae"	0.15821	0.48943	-0.96363	-0.056214	-0.2011
TMP2004.012.0019	Dinosaur Park Formation	"Saurornitholestinae"	-1.3445	-0.094633	-0.21045	-0.063994	-0.23612
TMP2003.012.0132	Dinosaur Park Formation	"Saurornitholestinae"	-1.5637	-0.28719	-0.060779	0.12123	-0.26442
TMP2002.060.0006	Dinosaur Park Formation	"Saurornitholestinae"	-2.9921	-0.58408	0.024329	-1.0189	-0.32641
TMP2001.012.0183	Dinosaur Park Formation	"Saurornitholestinae"	-0.67398	-0.90035	-0.60812	-0.10019	-0.18653
TMP2001.012.0180	Dinosaur Park Formation	"Saurornitholestinae"	-1.0268	-1.3273	-0.071563	-0.2809	-0.57891
TMP2002.060.0008	Dinosaur Park Formation	"Saurornitholestinae"	-1.7481	-0.50345	-0.091145	0.27384	-0.24808
TMP2001.012.0019	Dinosaur Park Formation	"Saurornitholestinae"	-1.1326	0.55077	-0.21107	0.67045	0.22343
TMP2000.012.0111	Dinosaur Park Formation	"Saurornitholestinae"	-1.8371	-0.83752	0.12358	0.37018	-0.21124
TMP2000.057.0006	Dinosaur Park Formation	"Saurornitholestinae"	-2.5577	-0.7852	0.094907	-0.2175	0.14709
TMP2000.012.0116	Dinosaur Park Formation	"Saurornitholestinae"	-1.4002	-0.51026	0.19434	-0.021986	0.30565
TMP2000.012.0114	Dinosaur Park Formation	"Saurornitholestinae"	-1.2313	0.465	0.025318	-0.16397	-0.11756
TMP2005.012.??	Dinosaur Park Formation	"Saurornitholestinae"	-3.4721	-1.3297	0.80181	-0.45354	-0.51521
TMP2004.012.0018	Dinosaur Park Formation	"Saurornitholestinae"	-2.2458	-0.76402	0.46186	-0.74022	-1.1319
TMP2003.012.0189	Dinosaur Park Formation	"Saurornitholestinae"	-1.9679	-0.53034	-0.090106	-0.16568	0.073722
TMP1983.036.0236	Dinosaur Park Formation	"Saurornitholestinae"	0.23951	-0.87393	-0.033709	0.12327	0.022385
TMP1995.012.0026	Dinosaur Park Formation	"Saurornitholestinae"	1.9456	1.0408	-0.64766	0.10423	0.20579
AMNH001	Two Medicine Formation	Bambiraptor	0.85683	0.43452	-0.46275	0.12941	0.49421
AMNH001	Two Medicine Formation	Bambiraptor	0.7266	0.58171	-0.88235	0.13323	0.53316
AMNH001	Two Medicine Formation	Bambiraptor	1.2262	0.41575	-0.13667	-0.028695	0.50972
AMNH001	Two Medicine Formation	Bambiraptor	0.98018	0.33824	-0.080754	-0.19967	0.43073
AMNH001	Two Medicine Formation	Bambiraptor	0.85376	0.44474	-0.53966	0.35783	0.43291
AMNH001	Two Medicine Formation	Bambiraptor	0.67671	0.33539	-0.39037	0.25894	0.45631
AMNH001	Two Medicine Formation	Bambiraptor	0.888	0.4311	-0.51068	0.43477	0.52387
AMNH001	Two Medicine Formation	Bambiraptor	1.4414	0.39257	-0.0031574	0.33884	0.057892
AMNH001	Two Medicine Formation	Bambiraptor	0.48539	0.33269	-0.49806	0.2978	0.075663
AMNH001	Two Medicine Formation	Bambiraptor	1.0229	0.57426	-0.56745	-0.26566	0.48121
LSUMG726:5923	Aguja Formation	"Saurornitholestinae"	-0.17476	0.20447	-0.48586	-0.31491	-0.18574
LSUMG746:6281	Aguja Formation	"Saurornitholestinae"	-0.66875	-0.39207	0.58486	-0.54643	-0.32858
LSUMG140:6139	Aguja Formation	"Saurornitholestinae"	0.28802	0.25966	-0.379	0.0094312	-0.19898
LSUMG489:5659	Aguja Formation	"Saurornitholestinae"	1.2535	0.71474	-0.69996	-0.30069	0.16546
LSUMG491:5950	Aguja Formation	"Saurornitholestinae"	1.8199	0.75277	-0.42872	-0.19079	0.078728
LSUMG113:5109	Aguja Formation	"Saurornitholestinae"	1.2151	0.44921	-0.20825	0.074152	-0.072497
LSUMG113:1309	Aguja Formation	"Saurornitholestinae"	2.2642	0.71477	-0.097489	0.028995	0.022992
LSUMG113:1307	Aguja Formation	"Saurornitholestinae"	0.66143	-0.35238	1.3143	-0.23798	-0.42939
LSUMG113:1308	Aguja Formation	"Saurornitholestinae"	-0.047907	0.14425	-0.28902	-0.21294	-0.22385
LSUMG726:6218	Aguja Formation	"Saurornitholestinae"	-5.3657	-2.002	1.4143	-2.1138	0.037636
LSUMG834:8211	Aguja Formation	"Saurornitholestinae"	-3.0335	-0.78389	-0.057207	-0.71554	-0.6117
LSUMG741:6023	Aguja Formation	"Saurornitholestinae"	1.3614	0.81558	-0.92254	-0.059856	0.32921
LSUMG113:1375	Aguja Formation	"Saurornitholestinae"	-0.43505	-0.17838	0.48103	-1.6047	0.32017
TMP1995.166.0001	Horseshoe Canyon Formation	Atrociraptor	-2.9958	1.0742	0.042874	-0.61331	0.61896
TMP1995.166.0001	Horseshoe Canyon Formation	Atrociraptor	-2.0778	-0.59587	0.18946	1.3617	-0.25441
TMP1995.166.0001	Horseshoe Canyon Formation	Atrociraptor	-2.7039	-0.50838	0.60068	1.8336	-0.1894
TMP1995.166.0001	Horseshoe Canyon Formation	Atrociraptor	-1.707	-0.4068	0.058975	1.1326	-0.080472
TMP1995.166.0001	Horseshoe Canyon Formation	Atrociraptor	-1.0324	-0.37355	-0.48789	0.39103	-0.73693
TMP1995.166.0001	Horseshoe Canyon Formation	Atrociraptor	-1.5984	-0.072745	0.023193	0.9198	-0.33202
TMP1995.166.0001	Horseshoe Canyon Formation	Atrociraptor	-0.2826	-0.59252	-0.60155	0.10021	-0.2325
TMP1995.166.0001	Horseshoe Canyon Formation	Atrociraptor	-3.2368	0.41008	0.38272	-0.31284	0.57347
TMP1995.166.0001	Horseshoe Canyon Formation	Atrociraptor	0.18818	0.42041	-0.23447	-0.14805	0.23233
TMP1995.166.0001	Horseshoe Canyon Formation	Atrociraptor	-1.6788	-0.14628	0.091684	1.0508	-0.16146
TMP1995.166.0001	Horseshoe Canyon Formation	Atrociraptor	-1.682	0.33895	-0.030808	-0.5462	-0.22174
TMP1995.166.0001	Horseshoe Canyon Formation	Atrociraptor	-1.1339	-0.75441	-0.6351	-0.56481	-0.39151
TMP1993.012.0021	Horseshoe Canyon Formation	Atrociraptor	-1.8783	1.2744	-0.20896	-0.061867	-0.076024
TMP2005.007.0003	Horseshoe Canyon Formation	Atrociraptor	-1.6689	0.32332	-0.3622	0.033924	-0.14559
TMP1990.082.0018	Horseshoe Canyon Formation	Atrociraptor	-2.3309	0.16799	-0.1504	-0.25659	-0.24547
TMP1990.082.0108	Horseshoe Canyon Formation	Atrociraptor	-2.407	1.0993	0.037126	-0.021997	0.1211
TMP1990.082.0017	Horseshoe Canyon Formation	Atrociraptor	-1.3563	0.46853	-0.32486	-0.1508	-0.051913
TMP1990.082.0021	Horseshoe Canyon Formation	Atrociraptor	-1.1738	0.3559	-0.71649	-0.27609	-0.12847
TMP1986.064.0003	Horseshoe Canyon Formation	Atrociraptor	-1.8991	0.23502	-0.11638	0.077432	0.1207
TMP1986.064.0002	Horseshoe Canyon Formation	Atrociraptor	0.13287	1.1742	-1.0643	-0.025042	0.087124
TMP1985.012.0002	Horseshoe Canyon Formation	Atrociraptor	-0.15256	1.1141	-0.91162	0.022653	0.22775
TMP1985.098.0002	Horseshoe Canyon Formation	Atrociraptor	-1.9702	0.025407	-0.13439	0.068406	-0.13459
TMP1984.064.0003	Horseshoe Canyon Formation	Atrociraptor	-0.059769	-0.33163	-0.60755	-0.20913	-0.40305
TMP1984.064.0012	Horseshoe Canyon Formation	Atrociraptor	-1.1704	0.49846	-0.39038	-0.13635	0.023315
TMP1984.079.0004	Horseshoe Canyon Formation	Atrociraptor	-1.8902	0.30687	-0.2867	-0.19926	-0.38989
TMP1965.016.0150	Horseshoe Canyon Formation	Atrociraptor	-1.968	2.46	0.64328	-0.15796	-0.0057323
TMP1999.050.0117	Horseshoe Canyon Formation	Atrociraptor	-0.63026	0.5005	-0.6343	-0.018272	0.0060705
TMP2000.045.0035	Horseshoe Canyon Formation	Atrociraptor	-0.48401	0.63159	-0.43455	-0.23513	0.015185
TMP2000.045.0103	Horseshoe Canyon Formation	Atrociraptor	-1.9435	0.44838	-0.12649	0.34806	0.26537
TMP2003.045.0052	Horseshoe Canyon Formation	Atrociraptor	-0.70726	0.21163	-0.42703	0.24332	-0.30653
TMP2003.045.0049	Horseshoe Canyon Formation	Atrociraptor	-0.85237	0.81369	-0.19633	-0.12824	-0.024809
UCMP187070	Lance Formation	"Saurornitholestinae"	0.78073	0.27729	-0.030192	-0.39688	0.44556
UCMP124401	Lance Formation	"Saurornitholestinae"	-0.54592	-0.17229	-0.045175	0.31324	-0.1618
UCMP187079	Lance Formation	"Saurornitholestinae"	1.0312	0.4199	-0.13673	-0.58889	0.46774
UCMP187054	Lance Formation	"Saurornitholestinae"	0.86363	0.16165	0.3373	-0.51047	0.028248
UCMP187027	Lance Formation	"Saurornitholestinae"	-0.037804	-0.11525	0.2272	0.047058	-0.097258
UCMP186891	Lance Formation	"Saurornitholestinae"	-2.8229	-1.3772	0.70944	2.0584	-0.21646
DSCN1690	Lance Formation	"Saurornitholestinae"	-3.0428	-0.71337	0.60711	0.71009	-0.2353
DSCN1498	Lance Formation	"Saurornitholestinae"	0.23808	0.18767	-0.27997	-0.053678	0.51932
AMNHA	Lance Formation	"Saurornitholestinae"	-1.032	-0.18114	-0.20429	-0.22348	-0.39441
AMNH(M?)	Lance Formation	"Saurornitholestinae"	-1.6692	-0.43021	-0.084103	-0.16061	-0.44741
AMNH(5412?)	Lance Formation	"Saurornitholestinae"	-1.986	-0.74444	0.31154	0.12725	-0.026368
AMNH(5412?)L	Lance Formation	"Saurornitholestinae"	-1.9563	-0.57176	-0.029336	0.076165	-0.24148
AMNH(5412?)R	Lance Formation	"Saurornitholestinae"	-2.3286	0.036581	0.10466	-0.096518	-0.5933
AMNH(5412?)N	Lance Formation	"Saurornitholestinae"	-1.8681	-0.47095	-0.12096	-0.27546	-0.06759
AMNH(5412?)K	Lance Formation	"Saurornitholestinae"	-1.5302	-0.20034	0.047198	-0.039011	-0.46115
AMNH(5412?)Q	Lance Formation	"Saurornitholestinae"	-1.7557	-0.33549	-0.24615	-0.61751	-0.38399
AMNH27099:5457a	Lance Formation	"Saurornitholestinae"	-2.2327	-0.27072	0.1167	-0.35588	-0.92874
AMNH27099:5457b	Lance Formation	"Saurornitholestinae"	-2.3466	-0.65087	-0.016483	-0.3657	-0.052197
AMNH27099:5462a	Lance Formation	"Saurornitholestinae"	-2.0912	-0.042237	0.29017	0.12398	-0.52943
AMNH27099:5462b	Lance Formation	"Saurornitholestinae"	-0.9901	-1.3247	-0.29295	-0.15383	-0.52558
AMNH27099:5464	Lance Formation	"Saurornitholestinae"	-3.266	-0.62319	0.14726	-0.54249	-0.55713
AMNH5475a	Lance Formation	"Saurornitholestinae"	-1.3653	-0.37833	-0.058909	0.12907	-0.5988
AMNH5475b	Lance Formation	"Saurornitholestinae"	-1.3188	-0.72531	-0.54214	-0.47243	-0.49749
AMNH5477L	Lance Formation	"Saurornitholestinae"	-0.35728	-0.45096	-0.22689	0.026328	-0.4605
AMNH5477R	Lance Formation	"Saurornitholestinae"	-0.76713	-0.10875	-0.44552	0.0070801	-0.33562
AMNH5695	Lance Formation	"Saurornitholestinae"	-2.1047	-0.70916	0.25301	-0.30382	0.066267
AMNH(M)5690	Lance Formation	"Saurornitholestinae"	-3.2803	-1.068	0.27094	-0.35776	0.29156
AMNH5688	Lance Formation	"Saurornitholestinae"	-0.30904	0.063042	-0.30927	-0.25089	0.37841
AMNH5688cent	Lance Formation	"Saurornitholestinae"	-0.22457	-0.07737	-0.11062	0.5539	-0.020844
AMNH5682	Lance Formation	"Saurornitholestinae"	-0.91385	-0.12436	-0.24664	-0.42839	0.32282
AMNH5697	Lance Formation	"Saurornitholestinae"	-1.7526	-0.63261	0.30879	-0.42289	0.66555
AMNH5703	Lance Formation	"Saurornitholestinae"	-0.11654	-0.019811	-0.070365	-0.00044447	0.60264
AMNH5671.2	Lance Formation	"Saurornitholestinae"	-1.1594	-0.32079	-0.088922	0.17677	-0.15945
AMNH5545.1	Lance Formation	"Saurornitholestinae"	-0.54115	-0.11074	-0.17632	0.29055	-0.12713
AMNH5671.1	Lance Formation	"Saurornitholestinae"	-0.59497	-0.079998	-0.14902	-0.15773	-0.49397
UCMP187125	Lance Formation	"Saurornitholestinae"	-0.41196	0.1036	-0.55032	0.16878	0.039554
UCMP187129	Lance Formation	"Saurornitholestinae"	-0.60757	-0.16478	-0.1724	0.48241	0.29329
UCMP187124	Lance Formation	"Saurornitholestinae"	-1.8407	-0.66907	0.0069924	1.1621	-0.34827
UCMP187105	Lance Formation	"Saurornitholestinae"	-0.72238	-0.23191	-0.020558	0.34654	-0.43872
UCMP187143	Lance Formation	"Saurornitholestinae"	-0.22829	-0.064956	-0.089486	0.25332	0.33665
UCMP187139	Lance Formation	"Saurornitholestinae"	0.15099	0.034864	-0.0065702	0.024221	0.38002
UCMP134801	Lance Formation	"Saurornitholestinae"	-0.55274	-0.29054	0.098973	0.60404	0.56921
UCMP187048	Lance Formation	"Saurornitholestinae"	-1.7276	-0.86147	0.47767	1.26	-0.16194
UCMP187049	Lance Formation	"Saurornitholestinae"	0.64677	0.0014042	0.47495	-0.25242	0.2442
UCMP186944	Lance Formation	"Saurornitholestinae"	0.28323	0.051204	0.11081	-0.15827	0.035691
UCMP187194	Lance Formation	"Saurornitholestinae"	0.4614	0.1404	0.050156	-0.26426	0.12986
UCMP186957	Lance Formation	"Saurornitholestinae"	0.40485	0.2366	-0.18518	-0.31319	0.036691
UCMP186962	Lance Formation	"Saurornitholestinae"	0.36956	0.22468	-0.18026	-0.30653	-0.018693
UCMP187041	Lance Formation	"Saurornitholestinae"	-0.18238	-0.22209	0.31896	0.21909	0.046713
UCMP187042	Lance Formation	"Saurornitholestinae"	0.60427	0.21766	-0.0055753	-0.36359	0.16864
UCMP187043	Lance Formation	"Saurornitholestinae"	0.94655	0.27599	0.1183	-0.51333	0.33937
UCMP187044	Lance Formation	"Saurornitholestinae"	0.74884	0.32449	-0.097343	-0.53562	0.024668
UCMP187045	Lance Formation	"Saurornitholestinae"	0.41719	0.32709	-0.39433	-0.30273	0.23705
UCMP187046	Lance Formation	"Saurornitholestinae"	1.37	0.18912	0.6457	-0.70396	0.27554
UCMP187036	Lance Formation	"Saurornitholestinae"	-0.72238	-0.23191	-0.020558	0.34654	-0.43872
UCMP187034	Lance Formation	"Saurornitholestinae"	-1.7471	-0.72378	0.20137	1.1317	-0.38247
UCMP187033	Lance Formation	"Saurornitholestinae"	-1.4878	-0.54981	-0.042242	1.0955	0.20557
UCMP187030	Lance Formation	"Saurornitholestinae"	-0.72238	-0.23191	-0.020558	0.34654	-0.43872
UCMP187025	Lance Formation	"Saurornitholestinae"	0.29385	-0.11785	0.52418	-0.18584	-0.30964
UCMP187006	Lance Formation	"Saurornitholestinae"	-1.6536	-0.77849	0.39575	1.1013	-0.41668
UCMP187038	Lance Formation	"Saurornitholestinae"	-0.13134	-0.060541	0.032817	0.077488	-0.063055
UCMP187010	Lance Formation	"Saurornitholestinae"	0.45969	0.11083	0.086193	-0.19156	0.31261
UCMP187083	Lance Formation	"Saurornitholestinae"	-0.5353	-0.34134	0.3682	0.28567	-0.50713
UCMP174796	Lance Formation	"Saurornitholestinae"	0.18248	0.3341	-0.56902	-0.24567	0.049713
UCMP187200	Lance Formation	"Saurornitholestinae"	1.2905	0.36389	0.20614	-0.73577	0.32735
UCMP187197	Lance Formation	"Saurornitholestinae"	0.26198	0.15933	-0.12945	-0.21385	-0.0020918
UCMP187199	Lance Formation	"Saurornitholestinae"	0.29898	0.20082	-0.17041	-0.29321	-0.12946
UCMP187198	Lance Formation	"Saurornitholestinae"	1.0771	0.26277	0.27172	-0.62312	0.1778
UCMP186958	Lance Formation	"Saurornitholestinae"	0.89001	0.3722	-0.11704	-0.56226	0.2462
UCMP186959	Lance Formation	"Saurornitholestinae"	0.79135	0.10824	0.38318	-0.42445	0.10023
UCMP186961	Lance Formation	"Saurornitholestinae"	-0.087123	-0.017254	-0.10918	0.22668	0.55819
UCMP79095	Lance Formation	"Saurornitholestinae"	-0.037804	-0.11525	0.2272	0.047058	-0.097258
UCMP124987	Lance Formation	"Saurornitholestinae"	-2.2744	-0.98956	0.2823	1.6782	0.083643
UCMP120339	Lance Formation	"Saurornitholestinae"	-3.6223	-1.561	0.61354	2.222	-1.2899
UCMP186957	Lance Formation	"Saurornitholestinae"	-0.49862	-0.0085518	-0.3391	0.17286	-0.2702
UCMP120305	Lance Formation	"Saurornitholestinae"	-3.7159	-1.5063	0.41916	2.2525	-1.2557
UCMP186960	Lance Formation	"Saurornitholestinae"	-1.1051	-0.39086	-0.0314	0.72103	-0.11658
UCMP187037	Lance Formation	"Saurornitholestinae"	-0.61098	-0.2239	-0.10033	0.62781	0.6588
UCMP187039	Lance Formation	"Saurornitholestinae"	-0.69049	-0.27912	0.046593	0.48528	-0.01783
UCMP186967	Lance Formation	"Saurornitholestinae"	-2.3382	-0.89515	0.14799	1.4007	-0.75814
UCMP186968	Lance Formation	"Saurornitholestinae"	-1.6451	-0.40069	-0.37092	0.84848	-0.60201
UCMP186972	Lance Formation	"Saurornitholestinae"	-1.5515	-0.4554	-0.17654	0.81805	-0.63621
UCMP186970	Lance Formation	"Saurornitholestinae"	-2.3382	-0.89515	0.14799	1.4007	-0.75814
UCMP186973	Lance Formation	"Saurornitholestinae"	0.19862	0.13728	-0.22064	0.028018	0.63575
UCMP186971	Lance Formation	"Saurornitholestinae"	-2.3382	-0.89515	0.14799	1.4007	-0.75814
UALVP48460	Milk River Formation	"Dromaeosauridae"	-1.8593	-0.63393	-0.22695	-0.70516	-0.12367
UALVP48458	Milk River Formation	"Dromaeosauridae"	-0.68951	1.3229	-0.41752	-0.6438	0.015001
UALVP48480	Milk River Formation	"Dromaeosauridae"	1.0595	2.3522	-0.60556	0.10854	0.20645
UALVP48461	Milk River Formation	"Dromaeosauridae"	-3.4864	-0.70693	0.10687	-0.9959	-0.79166
UALVP48462	Milk River Formation	"Dromaeosauridae"	-5.509	-0.63732	1.1225	0.26197	-0.27276
UALVP50220	Milk River Formation	"Dromaeosauridae"	-5.0849	-0.56059	1.0126	-1.234	-0.038541
UALVP50221	Milk River Formation	"Dromaeosauridae"	0.31929	-0.48226	-1.2226	-0.45617	-0.28814
UALVP50222	Milk River Formation	"Dromaeosauridae"	-1.8276	0.1503	-0.15226	-0.95314	-0.64631
UALVP48422	Milk River Formation	"Dromaeosauridae"	-0.49016	0.24759	-0.1328	-0.70708	-0.27118
UALVP48424	Milk River Formation	"Dromaeosauridae"	-2.5467	-0.818	0.22756	-0.48863	0.37955
UALVP49568	Milk River Formation	"Dromaeosauridae"	0.81242	0.55371	-0.72832	-0.029812	0.62562
UALVP49569	Milk River Formation	"Dromaeosauridae"	-0.10782	-1.1573	-0.79985	-0.0040911	-0.18709
UALVP47995	Milk River Formation	"Dromaeosauridae"	0.022924	0.2118	-0.35548	-0.31582	-0.42432
UALVP47996	Milk River Formation	"Dromaeosauridae"	0.51195	0.045723	-0.86536	-0.11682	-0.3867
UALVP48062	Milk River Formation	"Dromaeosauridae"	-0.61623	-0.37538	-0.1515	0.091418	-0.4361
UALVP48069	Milk River Formation	"Dromaeosauridae"	0.20149	0.14797	-0.26239	0.21226	0.22533
UALVP48071	Milk River Formation	"Dromaeosauridae"	0.22682	0.32645	-0.59261	0.057149	-0.22029
UALVP48420	Milk River Formation	"Dromaeosauridae"	-2.3015	0.036839	0.17018	-0.19771	-0.60061
UALVP48426	Milk River Formation	"Dromaeosauridae"	-0.93756	-0.23685	-0.48775	-0.61007	-0.71028
UALVP48439	Milk River Formation	"Dromaeosauridae"	-5.4999	-1.3232	1.2684	-1.0854	-0.14104
UALVP48472	Milk River Formation	"Dromaeosauridae"	-0.55094	0.52937	-0.23718	-0.67888	-0.29901
UALVP49570	Milk River Formation	"Dromaeosauridae"	0.44327	0.031623	-0.78683	-0.094033	-0.12598
UALVP49571	Milk River Formation	"Dromaeosauridae"	-1.3587	-0.38969	0.15575	-0.80351	0.098667
UALVP49572	Milk River Formation	"Dromaeosauridae"	1.4682	0.088654	-0.94199	-0.066268	0.17013
UALVP49573	Milk River Formation	"Dromaeosauridae"	-3.6191	0.053153	0.4233	-1.6245	-0.91825
UALVP49574	Milk River Formation	"Dromaeosauridae"	-5.5489	-1.7457	1.0696	-3.427	-0.45689
UALVP49575	Milk River Formation	"Dromaeosauridae"	0.45094	0.29624	-0.34516	-0.11767	0.19163
UALVP49576	Milk River Formation	"Dromaeosauridae"	0.085871	-0.12308	-0.2925	0.095664	0.27533
CMNFVuncat	Milk River Formation	"Dromaeosauridae"	-2.2929	0.078691	0.087582	-0.35322	-0.069417
UALVP48028	Milk River Formation	"Dromaeosauridae"	0.16401	0.33676	-0.49147	-0.77882	0.60813
UALVP49594	Milk River Formation	"Dromaeosauridae"	0.31285	0.53443	-0.81137	-0.83037	0.43609
UALVP49595	Milk River Formation	"Dromaeosauridae"	0.10376	0.52811	-0.51985	-0.28867	0.59638
UMNH424-14398	Straight Cliffs Formation	"Dromaeosauridae"	0.03896	0.0096015	-0.39893	-0.67026	-0.29045
TMP1999.055.0328	Oldman Formation	"Dromaeosauridae"	-0.88232	-0.11833	-0.34383	-0.03459	0.46265
TMP1989.077.0006	Oldman Formation	"Dromaeosauridae"	-2.0396	-0.52457	-0.2313	-0.021424	0.80908
TMP1989.077.0006	Oldman Formation	"Dromaeosauridae"	-1.9308	-0.50541	-0.18993	-0.010743	0.57721
TMP1992.077.0002	Oldman Formation	"Dromaeosauridae"	-2.8729	-0.82428	0.19247	-1.1251	0.1661
TMP1985.068.0032	Oldman Formation	"Dromaeosauridae"	-3.5197	-1.1729	0.3833	-0.74049	1.2066
TMP1987.153.0056	Oldman Formation	"Dromaeosauridae"	-2.7513	-0.63889	-0.10352	-1.2801	0.1671
AMNH5356	Dinosaur Park Formation	"Dromaeosaurinae"	-4.3249	0.27238	0.92024	-0.59239	-0.086042
AMNH5356	Dinosaur Park Formation	"Dromaeosaurinae"	-3.832	0.45984	0.52971	-0.47042	-0.15835
AMNH5356	Dinosaur Park Formation	"Dromaeosaurinae"	-4.3168	0.11065	0.85966	-0.63037	-0.41754
AMNH5356	Dinosaur Park Formation	"Dromaeosaurinae"	-3.2948	1.2003	0.54663	-0.050869	-0.15077
AMNH5356	Dinosaur Park Formation	"Dromaeosaurinae"	-3.4072	0.57365	0.50795	-0.2271	-0.3037
AMNH5356	Dinosaur Park Formation	"Dromaeosaurinae"	-2.4515	0.52966	0.70265	-0.40434	-0.09857
AMNH5356	Dinosaur Park Formation	"Dromaeosaurinae"	-2.861	0.58611	1.0917	-1.3824	0.26319
AMNH5356	Dinosaur Park Formation	"Dromaeosaurinae"	-3.6595	0.62932	0.54965	-0.62302	0.29127
AMNH5356	Dinosaur Park Formation	"Dromaeosaurinae"	-3.6865	0.4544	0.70621	-0.79319	0.029206
AMNH5356	Dinosaur Park Formation	"Dromaeosaurinae"	-3.713	0.4415	0.71205	-0.759	-0.01998
AMNH5356	Dinosaur Park Formation	"Dromaeosaurinae"	-2.5299	0.79575	0.2417	-0.70829	-0.069114
TMP1985.036.0332	Dinosaur Park Formation	"Dromaeosaurinae"	-0.28576	0.032363	-0.16255	-0.47669	0.25806
TMP1995.143.0045	Dinosaur Park Formation	"Dromaeosaurinae"	-1.3363	-0.2749	-0.20863	-0.42519	0.58737
TMP1980.008.0298	Dinosaur Park Formation	"Dromaeosaurinae"	-1.6474	-0.25893	-0.53002	-0.1154	0.62748
TMP1980.008.0308	Dinosaur Park Formation	"Dromaeosaurinae"	-1.5777	-0.24632	-0.4254	-0.32952	0.073813
TMP1981.016.0281	Dinosaur Park Formation	"Dromaeosaurinae"	-2.2345	-0.44308	-0.39773	-0.52432	0.43208
TMP1995.406.0004	Dinosaur Park Formation	"Dromaeosaurinae"	-2.53	-0.69494	-0.027201	-0.60786	0.69754
TMP1986.130.0218	Dinosaur Park Formation	"Dromaeosaurinae"	-2.2765	-0.55197	-0.2381	-0.29726	0.44208
TMP1986.130.0211	Dinosaur Park Formation	"Dromaeosaurinae"	-2.5744	0.95708	0.15571	-0.35124	0.25386
TMP1981.026.0175	Dinosaur Park Formation	"Dromaeosaurinae"	-2.7228	0.341	0.35198	-0.24772	0.34761
TMP1998.093.0172	Dinosaur Park Formation	"Dromaeosaurinae"	-2.1677	-0.55133	-0.18546	-0.14814	0.15023
TMP1981.014.0060	Dinosaur Park Formation	"Dromaeosaurinae"	-2.8454	-0.79697	0.03838	-0.75334	0.50041
TMP1995.171.0040	Dinosaur Park Formation	"Dromaeosaurinae"	-2.8675	-0.93715	0.30617	-0.64614	0.58139
TMP1995.171.0040	Dinosaur Park Formation	"Dromaeosaurinae"	-3.2359	-1.1705	0.46486	-0.11111	0.37305
TMP1966.025.0016	Dinosaur Park Formation	"Dromaeosaurinae"	-3.3995	0.090508	0.60289	0.21587	0.66577
TMP1979.008.0732	Dinosaur Park Formation	"Dromaeosaurinae"	-3.3985	-1.0605	0.23736	-0.65131	0.44947
TMP1980.016.2094	Dinosaur Park Formation	"Dromaeosaurinae"	-3.8859	-1.249	0.34837	-0.5967	0.00031091
TMP1981.027.0066	Dinosaur Park Formation	"Dromaeosaurinae"	-4.2553	-1.2617	0.22854	-1.0629	0.25339
TMP1982.018.0137	Dinosaur Park Formation	"Dromaeosaurinae"	-3.3242	-0.87111	-0.012703	-1.0582	0.045173
TMP1983.067.0038	Dinosaur Park Formation	"Dromaeosaurinae"	-4.2453	-1.2616	0.17682	-0.66926	-0.36367
TMP1984.067.0115	Dinosaur Park Formation	"Dromaeosaurinae"	-3.1354	0.35118	0.55755	-0.015161	0.16446
TMP1984.089.0048	Dinosaur Park Formation	"Dromaeosaurinae"	-3.1441	-1.2548	0.69527	-0.068837	0.5216
TMP1986.018.0099	Dinosaur Park Formation	"Dromaeosaurinae"	-3.3578	-1.0429	0.14934	-0.36077	0.52854
TMP1986.076.0011	Dinosaur Park Formation	"Dromaeosaurinae"	-5.3877	-1.9142	0.90213	-0.98477	0.44962
TMP1989.155.0002	Dinosaur Park Formation	"Dromaeosaurinae"	-4.3596	-1.4239	0.38234	-0.35618	-0.28169
TMP1989.036.0354	Dinosaur Park Formation	"Dromaeosaurinae"	-3.3676	-0.97406	0.011195	-0.42491	0.41827
TMP1993.036.0460	Dinosaur Park Formation	"Dromaeosaurinae"	-3.8132	-1.3121	0.3456	-0.16336	1.408
TMP1993.036.0462	Dinosaur Park Formation	"Dromaeosaurinae"	-3.4875	-1.1299	0.27115	-0.34269	0.23452
TMP1993.036.0472	Dinosaur Park Formation	"Dromaeosaurinae"	-3.5551	-1.1514	0.37013	-0.73788	0.24353
TMP1994.012.0241	Dinosaur Park Formation	"Dromaeosaurinae"	-4.1014	-1.4861	0.61813	-0.1632	0.18307
TMP1994.012.0247	Dinosaur Park Formation	"Dromaeosaurinae"	-4.4553	-1.4556	0.38521	-0.51616	0.42055
TMP1994.012.0652	Dinosaur Park Formation	"Dromaeosaurinae"	-3.6342	-1.1337	0.36701	-1.1245	0.32502
TMP1994.172.0039	Dinosaur Park Formation	"Dromaeosaurinae"	-3.171	-0.83932	-0.073404	-0.82621	0.61662
TMP1995.127.0026-a	Dinosaur Park Formation	"Dromaeosaurinae"	-3.0145	-0.71497	-0.22427	-0.74369	-0.085124
TMP1995.137.0001	Dinosaur Park Formation	"Dromaeosaurinae"	-2.3831	-0.86239	0.49571	-0.58477	-0.20927
TMP1996.012.0362	Dinosaur Park Formation	"Dromaeosaurinae"	-3.5881	-1.1104	0.1959	-0.53677	0.42778
TMP1995.151.0010	Dinosaur Park Formation	"Dromaeosaurinae"	-3.2254	-1.0762	0.27365	-0.032	-0.15152
TMP1979.014.1000	Dinosaur Park Formation	"Dromaeosaurinae"	-1.4675	-0.14017	-0.62671	-0.29409	0.53889
TMP1979.015.0002	Dinosaur Park Formation	"Dromaeosaurinae"	-3.2803	-0.93423	0.013441	-0.66083	0.81597
TMP1981.016.0161	Dinosaur Park Formation	"Dromaeosaurinae"	-1.8294	-0.34552	-0.43287	-0.30891	0.99251
TMP1981.022.0093	Dinosaur Park Formation	"Dromaeosaurinae"	-0.98239	-0.0045778	-0.55856	-0.54316	0.74841
TMP1984.089.0047	Dinosaur Park Formation	"Dromaeosaurinae"	-2.8923	-0.72002	-0.065737	-1.2494	0.85325
TMP1985.036.0336	Dinosaur Park Formation	"Dromaeosaurinae"	-2.3434	-0.695	0.12555	-0.71376	0.66113
TMP1985.052.0010	Dinosaur Park Formation	"Dromaeosaurinae"	-0.27766	0.10013	-0.38559	-0.12178	0.097794
TMP1985.059.0081	Dinosaur Park Formation	"Dromaeosaurinae"	-2.7778	-0.77545	-0.060605	-0.35815	0.4914
TMP1985.068.0047	Dinosaur Park Formation	"Dromaeosaurinae"	-1.6879	-0.32612	-0.43507	0.10531	0.21268
TMP1986.054.0067	Dinosaur Park Formation	"Dromaeosaurinae"	-1.1794	-0.077582	-0.50955	-0.58677	0.64375
TMP1988.050.0127	Dinosaur Park Formation	"Dromaeosaurinae"	-1.3878	-0.27944	-0.35892	0.071234	0.66744
TMP1990.145.0001	Dinosaur Park Formation	"Dromaeosaurinae"	-3.0536	-0.72429	-0.18286	-1.0365	0.31869
TMP1994.012.0266	Dinosaur Park Formation	"Dromaeosaurinae"	-1.5087	-0.16693	-0.57791	-0.44788	0.88342
TMP1995.134.0005	Dinosaur Park Formation	"Dromaeosaurinae"	-2.9431	-0.77516	0.052268	-1.3559	0.81346
TMP1995.151.0008	Dinosaur Park Formation	"Dromaeosaurinae"	-1.904	-0.45187	-0.20783	-0.41735	0.82485
TMP1995.181.0009	Dinosaur Park Formation	"Dromaeosaurinae"	-0.26675	0.14892	-0.53005	-0.10498	0.72294
Bobssite	Dinosaur Park Formation	"Dromaeosaurinae"	-3.8923	-1.1049	0.14931	-1.3134	0.76795
p812648	Dinosaur Park Formation	"Dromaeosaurinae"	-2.2032	0.671	0.31175	1.1601	-0.5423
p80897	Dinosaur Park Formation	"Dromaeosaurinae"	-1.2363	1.8886	-0.80733	-0.44112	-2.366
p836738	Dinosaur Park Formation	"Dromaeosaurinae"	-4.4958	0.064048	0.62477	-0.84132	-0.47039
CMNFVuncat	Dinosaur Park Formation	"Dromaeosaurinae"	-2.6565	0.7079	0.15791	1.2651	-0.99756
CMNFVuncat	Dinosaur Park Formation	"Dromaeosaurinae"	-2.4129	0.73225	0.19552	1.3639	-0.24436
p8218137	Dinosaur Park Formation	"Dromaeosaurinae"	-2.0123	1.007	0.0078172	0.84896	-0.80072
p8220388	Dinosaur Park Formation	"Dromaeosaurinae"	-4.0112	-0.42118	0.93898	2.6653	-0.30686
p849912	Dinosaur Park Formation	"Dromaeosaurinae"	-3.0276	-0.006411	0.46306	1.7426	-0.76779
TMP1980.008.0214	Dinosaur Park Formation	"Dromaeosaurinae"	-1.6821	-0.55365	0.28871	-0.73136	0.10738
TMP1985.066.0056	Dinosaur Park Formation	"Dromaeosaurinae"	-2.7002	0.90227	0.31613	0.040586	0.43985
TMP2001.012.0179	Dinosaur Park Formation	"Dromaeosaurinae"	-1.9346	1.2962	0.043315	1.0464	0.061866
TMP2001.012.0181	Dinosaur Park Formation	"Dromaeosaurinae"	-4.6532	0.16377	0.74019	-1.0894	-0.0027074
TMP1998.084.0003	Dinosaur Park Formation	"Dromaeosaurinae"	-3.1229	0.064542	0.4107	-0.76438	-1.0202
TMP1985.098.0005	Dinosaur Park Formation	"Dromaeosaurinae"	-2.3426	1.1468	0.13862	-0.31211	0.45238
TMP1983.045.0003	Dinosaur Park Formation	"Dromaeosaurinae"	-2.6693	-0.27505	0.89133	-1.1975	0.86182
TMP2003.045.0060	Dinosaur Park Formation	"Dromaeosaurinae"	-1.9953	0.52597	0.30225	0.18216	-0.13304
TMP1998.063.0071	Horseshoe Canyon Formation	"Dromaeosaurinae"	-0.84559	0.88513	-0.037318	0.055574	-0.28599
TMP1998.064.0017	Horseshoe Canyon Formation	"Dromaeosaurinae"	-2.6034	0.043044	-0.014919	-0.43018	-0.16813
TMP1999.050.0116	Horseshoe Canyon Formation	"Dromaeosaurinae"	-4.1519	-0.15863	0.6571	-0.78399	-0.55015
TMP2000.045.0040	Horseshoe Canyon Formation	"Dromaeosaurinae"	-2.6289	0.12695	0.27693	-0.015002	-0.5923
TMP2000.045.0102	Horseshoe Canyon Formation	"Dromaeosaurinae"	-2.3358	-0.64348	-0.016156	-0.26612	-0.6041
TMP2000.045.0082	Horseshoe Canyon Formation	"Dromaeosaurinae"	-3.1841	0.3147	0.33392	-0.36481	0.035277
TMP2001.045.0083	Horseshoe Canyon Formation	"Dromaeosaurinae"	-5.4529	-0.75988	1.0325	-0.58452	0.31872
TMP2002.045.0050	Horseshoe Canyon Formation	"Dromaeosaurinae"	-3.209	0.0070293	0.43014	-0.26832	-0.28716
TMP1998.063.0032	Horseshoe Canyon Formation	"Dromaeosaurinae"	-4.1462	-0.1311	0.47877	-0.80548	-0.36574
TMP2009.122.0004	Horseshoe Canyon Formation	"Dromaeosaurinae"	-2.9363	0.18448	0.2503	-0.37084	-0.454
TMP2009.122.0002	Horseshoe Canyon Formation	"Dromaeosaurinae"	-2.3178	0.68155	0.10752	-0.41727	-0.025953
TMP2005.007.0005	Horseshoe Canyon Formation	"Dromaeosaurinae"	-1.6011	2.506	0.69224	0.038011	0.72597
UALVP48431	Milk River Formation	"Zapsalis"	0.33978	0.49977	-0.803	-0.5256	0.64347
UALVP48468	Milk River Formation	"Zapsalis"	0.24812	0.11534	-0.63997	-0.1844	0.12139
UALVP49582	Milk River Formation	"Zapsalis"	-0.26732	0.087086	-0.45587	0.35746	-0.075154
UALVP49583	Milk River Formation	"Zapsalis"	-1.2383	-0.23448	-0.26552	-0.12025	-0.10564
UALVP49584	Milk River Formation	"Zapsalis"	-0.013622	0.31653	-0.6384	-0.46143	0.54658
UALVP49585	Milk River Formation	"Zapsalis"	0.13166	0.28737	-0.42473	-0.68362	0.59141
UALVP49586	Milk River Formation	"Zapsalis"	0.66593	0.45274	-0.49176	-0.50976	0.76938
UALVP49587	Milk River Formation	"Zapsalis"	0.78539	0.41319	-0.37107	-0.27498	0.61005
UALVP49588	Milk River Formation	"Zapsalis"	0.030978	0.28722	-0.54948	-0.45035	0.60722
UALVP49589	Milk River Formation	"Zapsalis"	0.073706	0.25516	-0.38089	-0.68682	0.4346
UALVP49590	Milk River Formation	"Zapsalis"	0.90902	0.54198	-0.57802	-0.22364	0.42596
AMNHFR3953	Milk River Formation	"Zapsalis"	-2.923	-0.80719	-0.16047	0.11377	-0.17818
TMP1984.163.0080	Milk River Formation	"Zapsalis"	-2.0781	-0.47473	-0.37353	0.3176	-0.45583
TMP1980.016.0833	Milk River Formation	"Zapsalis"	-2.7443	-0.75966	-0.047583	-0.29616	-0.17814
TMP1982.019.0458	Milk River Formation	"Zapsalis"	-2.3139	-0.73732	-0.050724	0.60785	0.14123
TMP1982.019.0458	Milk River Formation	"Zapsalis"	-2.4215	-0.80267	8.3404e-05	0.70052	0.15783
TMP1982.019.0007	Milk River Formation	"Zapsalis"	-3.7338	-1.2396	0.16942	0.48233	-0.066507
TMP1985.058.0065	Milk River Formation	"Zapsalis"	-1.9188	-0.48789	-0.24903	0.24381	0.019437
TMP1985.006.0002	Milk River Formation	"Zapsalis"	-3.0264	-0.93809	0.016825	0.27242	-0.049261
TMP1986.077.0112	Milk River Formation	"Zapsalis"	-3.7273	-1.2277	0.19341	0.43968	-0.64797
TMP1987.036.0005	Milk River Formation	"Zapsalis"	-3.4231	-1.2171	0.25117	0.70916	0.25528
TMP1989.036.0312	Milk River Formation	"Zapsalis"	-2.8365	-0.78178	-0.10986	-0.090279	-0.17713
TMP1994.012.0268	Milk River Formation	"Zapsalis"	-2.0855	-0.61636	-0.086264	0.34124	-0.14721
TMP1997.133.0002	Milk River Formation	"Zapsalis"	-3.0134	-0.89821	0.075972	-0.3201	0.031231
TMP1979.015.0003	Milk River Formation	"Zapsalis"	-3.364	-1.154	0.13921	0.7044	0.43854
TMP1984.091.0040	Milk River Formation	"Zapsalis"	-2.7776	-0.82505	-0.053677	0.15311	0.15567
TMP1984.091.0040	Milk River Formation	"Zapsalis"	-2.8933	-0.79198	-0.17706	0.10894	-0.12075
TMP1985.006.0131	Milk River Formation	"Zapsalis"	-2.2754	-0.65414	-0.15638	0.52214	-0.41094
TMP1985.006.0133	Milk River Formation	"Zapsalis"	-2.8031	-0.78729	-0.1074	0.042114	-0.18104
TMP1986.036.0425	Milk River Formation	"Zapsalis"	-3.105	-0.86353	-0.14752	0.14889	-0.45305
TMP1987.050.0008	Milk River Formation	"Zapsalis"	-3.4669	-1.0689	0.046323	0.13407	0.00056571
TMP1989.050.0202	Milk River Formation	"Zapsalis"	-1.5079	-0.25696	-0.52484	0.43787	-0.21164
TMP1990.050.0208	Milk River Formation	"Zapsalis"	-2.2668	-0.65828	-0.12168	0.34449	-0.025428
TMP1990.053.0021	Milk River Formation	"Zapsalis"	-1.7255	-0.46188	-0.25463	0.49917	0.24756
TMP1991.050.0060	Milk River Formation	"Zapsalis"	-2.8713	-0.92634	-0.072986	0.94294	0.0036992
MOR553	Judith River Formation	Troodontidae	-1.7851	1.1395	-0.59175	-0.090814	-0.094871
MOR554	Judith River Formation	Troodontidae	-3.1659	1.3655	-0.014012	-0.011987	-0.26463
MOR555	Judith River Formation	Troodontidae	-3.153	1.4299	-0.12951	-0.12766	-0.1312
MOR556	Judith River Formation	Troodontidae	-2.5393	1.5445	0.007081	-0.044649	-0.19806
MOR557	Judith River Formation	Troodontidae	-2.0121	1.5234	-0.21859	0.17126	-0.19688
MOR558	Judith River Formation	Troodontidae	-1.2203	1.7885	-0.4225	0.71553	-0.09861
Fukui22	Judith River Formation	Troodontidae	-2.5347	1.4579	-0.058355	0.10688	-0.25162
p849114	Dinosaur Park Formation	Troodontidae	-2.1765	1.9801	-0.40389	0.95869	-0.11224
p798498	Dinosaur Park Formation	Troodontidae	-1.8037	2.2359	-0.53657	0.59743	-0.29676
p841832	Dinosaur Park Formation	Troodontidae	-2.1466	1.9626	-0.34168	0.94895	-0.12319
p80161370	Dinosaur Park Formation	Troodontidae	-2.244	2.074	-0.51142	0.8319	-0.52269
p8219370	Dinosaur Park Formation	Troodontidae	-2.0007	1.9946	-0.3684	0.9206	0.097916
p80161950	Dinosaur Park Formation	Troodontidae	-1.8698	1.9014	-0.39623	0.73693	-0.23503
p8561	Dinosaur Park Formation	Troodontidae	-1.7785	2.368	-0.49734	0.7496	0.25225
p7412	Dinosaur Park Formation	Troodontidae	-3.5571	1.8262	0.015563	-0.48699	-0.15269
p8116501	Dinosaur Park Formation	Troodontidae	-2.2069	1.8445	-0.46218	0.8081	-0.65873
p841685	Dinosaur Park Formation	Troodontidae	-2.0271	1.7462	-0.44058	0.76274	-0.51065
TMP2000.012.0117	Dinosaur Park Formation	Troodontidae	-1.5913	1.8159	-0.46094	0.051932	-0.00028366
TMP1996.012.0072	Dinosaur Park Formation	Troodontidae	-2.3689	1.7101	-0.31691	0.13742	0.17348
TMP1995.012.0011	Dinosaur Park Formation	Troodontidae	-1.8852	-0.093071	-0.97709	-0.25331	-0.17065
TMP1995.021.0010	Dinosaur Park Formation	Troodontidae	-2.2745	1.8846	-0.31559	-0.41262	-0.014746
TMP1989.089.0004	Dinosaur Park Formation	Troodontidae	0.47553	0.67504	-1.1761	-0.097352	0.10465
TMP1987.050.0034	Dinosaur Park Formation	Troodontidae	-0.13096	0.67316	-1.5731	-0.13893	0.21437
TMP1986.216.0004	Dinosaur Park Formation	Troodontidae	-1.3156	0.17679	-1.2091	-0.20704	-0.2229
TMP1987.036.0139	Dinosaur Park Formation	Troodontidae	-2.609	1.2926	-0.19181	-0.065551	-0.37281
TMP1989.050.0129	Dinosaur Park Formation	Troodontidae	-0.47868	0.60241	-1.5712	-0.34719	-0.18629
TMP1986.177.0008	Dinosaur Park Formation	Troodontidae	0.29403	0.71395	-1.3525	-0.1501	-0.20216
TMP1985.066.0073	Dinosaur Park Formation	Troodontidae	-0.021927	0.64152	-1.4447	-0.056084	0.13223
TMP1989.116.0063	Dinosaur Park Formation	Troodontidae	-0.65875	2.2776	-0.7996	-0.0098055	0.18331
TMP1984.089.0275	Dinosaur Park Formation	Troodontidae	-2.3439	1.552	-0.2875	0.2647	0.0053154
TMP1986.023.0091	Dinosaur Park Formation	Troodontidae	0.70636	0.78534	-1.3185	0.12265	0.037445
TMP1986.008.0093	Dinosaur Park Formation	Troodontidae	0.12407	0.67159	-1.327	-0.32082	-0.24184
TMP1986.130.0016	Dinosaur Park Formation	Troodontidae	-1.876	1.3568	-0.3291	-0.023304	-0.13392
TMP1983.036.0214	Dinosaur Park Formation	Troodontidae	-2.0358	2.2378	-0.46403	-0.41232	0.31569
TMP1985.056.0182	Dinosaur Park Formation	Troodontidae	-3.3488	1.1108	-0.0060002	-0.28964	0.17634
TMP1985.056.0179	Dinosaur Park Formation	Troodontidae	-2.2094	-0.15061	-0.98222	-0.5383	-0.37847
TMP1986.054.0066	Dinosaur Park Formation	Troodontidae	0.81943	2.6755	-1.2627	0.19135	0.65794
TMP1994.016.0015	Dinosaur Park Formation	Troodontidae	-0.89822	2.3582	-0.49651	0.16789	0.179
TMP1987.036.0301	Dinosaur Park Formation	Troodontidae	-1.3246	2.5052	-0.72191	0.13805	-0.061962
TMP1987.077.0135	Dinosaur Park Formation	Troodontidae	0.14054	0.67101	-1.3311	-0.26071	-0.21269
TMP1995.127.0027	Dinosaur Park Formation	Troodontidae	-2.4219	1.7256	-0.27252	-0.27871	-0.038149
TMP1990.034.0001	Dinosaur Park Formation	Troodontidae	-1.6757	2.825	-0.064536	0.25801	-0.25895
TMP1986.202.0005	Dinosaur Park Formation	Troodontidae	0.25485	3.3331	0.071778	0.20116	0.20364
TMP2000.019.0001	Dinosaur Park Formation	"Pectinodon"	0.24994	0.72667	-1.6256	0.57565	0.41708
TMP2000.021.0001	Dinosaur Park Formation	"Pectinodon"	0.093893	0.77766	-1.8328	0.57444	0.24194
TMP1979.008.0635	Dinosaur Park Formation	"Pectinodon"	0.89585	1.057	-1.8949	0.4645	0.22379
TMP1997.044.0004	Horseshoe Canyon Formation	Troodontidae	-2.902	1.7484	-0.081102	-0.77135	-0.16322
TMP1994.009.0004	Horseshoe Canyon Formation	Troodontidae	-2.6942	2.1003	-0.22112	-0.19152	-0.32232
TMP1987.012.0014	Horseshoe Canyon Formation	Troodontidae	-2.7254	2.1919	-0.34438	-0.13677	0.024697
TMP1988.096.0007	Horseshoe Canyon Formation	Troodontidae	-3.4372	1.8689	-0.12791	-0.20958	-0.29121
TMP1998.068.0156a	Horseshoe Canyon Formation	Troodontidae	-3.3304	1.7515	0.031948	-0.39966	-0.42425
TMP1998.068.0156b	Horseshoe Canyon Formation	Troodontidae	-3.0012	2.1799	-0.22722	-0.2979	-0.26338
TMP1998.068.0156c	Horseshoe Canyon Formation	Troodontidae	-3.1161	2.0713	-0.13608	-0.52875	0.017749
TMP1997.007.0003	Horseshoe Canyon Formation	Troodontidae	-2.7567	1.8924	-0.30575	-0.6858	-0.14137
TMP1997.077.0004	Horseshoe Canyon Formation	Troodontidae	-2.9234	1.9223	-0.087954	-0.909	-0.1144
TMP1994.009.0004	Horseshoe Canyon Formation	Troodontidae	-2.525	2.3634	-0.33758	-0.43546	-0.3631
TMP1990.082.0024	Horseshoe Canyon Formation	Troodontidae	-3.101	1.8144	-0.020274	-0.63959	-0.2826
TMP1990.082.0025	Horseshoe Canyon Formation	Troodontidae	-0.48038	2.1035	-0.77019	0.27805	0.13619
TMP1990.082.0026	Horseshoe Canyon Formation	Troodontidae	-2.7655	1.9202	-0.16896	-0.59343	-0.11846
TMP1988.096.0002	Horseshoe Canyon Formation	Troodontidae	-3.5206	2.0244	-0.13154	-0.43615	-0.31544
TMP1985.031.0019	Horseshoe Canyon Formation	Troodontidae	-2.5334	2.2515	-0.47571	-0.31617	-0.19276
TMP1983.045.0005	Horseshoe Canyon Formation	Troodontidae	-3.0503	2.0465	-0.11615	-0.62507	-0.16747
TMP1983.045.0006	Horseshoe Canyon Formation	Troodontidae	-3.2502	1.9945	-0.12971	-0.868	-0.19002
TMP1974.001.0002	Horseshoe Canyon Formation	Troodontidae	-3.441	1.8392	0.098758	-0.64853	-0.26598
TMP1974.001.0001	Horseshoe Canyon Formation	Troodontidae	-1.6969	1.5965	-0.64832	-0.27188	0.0096149
TMP1985.012.0002	Horseshoe Canyon Formation	Troodontidae	-0.79087	3.2186	-0.34566	0.1452	0.034016
TMP1985.030.0032	Horseshoe Canyon Formation	Troodontidae	-0.78379	3.252	-0.56416	0.65718	0.41566
TMP1998.063.0043	Horseshoe Canyon Formation	Troodontidae	-3.8337	1.3863	0.015249	-0.38776	0.18736
TMP1999.050.0115	Horseshoe Canyon Formation	Troodontidae	-3.8676	1.6573	0.081947	-0.48705	0.43049
TMP1999.050.0114	Horseshoe Canyon Formation	Troodontidae	-2.5058	1.9603	-0.23635	-0.38881	-0.33933
TMP2000.045.0090	Horseshoe Canyon Formation	Troodontidae	-0.37129	0.50416	-1.3354	-0.2233	0.22702
TMP2000.045.0024	Horseshoe Canyon Formation	Troodontidae	-0.4725	0.56552	-1.4456	-0.59355	0.15865
TMP2000.045.0091	Horseshoe Canyon Formation	Troodontidae	-3.4055	1.8137	0.12903	-0.37648	0.40571
TMP2001.045.0080	Horseshoe Canyon Formation	Troodontidae	-4.6754	1.2282	0.43154	-0.56967	0.062287
TMP2001.045.0081	Horseshoe Canyon Formation	Troodontidae	-2.144	1.9282	-0.26379	-0.49303	0.034654
TMP2002.045.0048	Horseshoe Canyon Formation	Troodontidae	-2.025	2.0192	-0.30925	0.73203	-0.53011
TMP2003.045.0058	Horseshoe Canyon Formation	Troodontidae	-2.2447	1.9998	-0.32382	-0.22585	-0.028669
TMP2009.122.0001	Horseshoe Canyon Formation	Troodontidae	-3.7958	1.6151	0.075768	-0.69191	-0.064253
TMP1995.002.0023	Horseshoe Canyon Formation	Troodontidae	-2.126	2.0529	-0.23092	-0.17902	-0.51023
TMP1993.012.0013	Horseshoe Canyon Formation	Troodontidae	-2.8913	1.9849	-0.22766	-0.82972	-0.085812
TMP1989.125.0014	Horseshoe Canyon Formation	Troodontidae	-0.71539	2.9302	-0.94676	-0.13896	0.85888
TMP1987.012.0019	Horseshoe Canyon Formation	Troodontidae	-3.2913	2.1708	-0.25872	-0.62867	-0.32329
UCMP187076	Lance Formation	"Pectinodon"	1.3217	0.87817	-1.1389	0.17986	0.18725
UCMP187075	Lance Formation	"Pectinodon"	0.88164	0.68565	-1.0738	0.48642	0.14339
UCMP187073	Lance Formation	"Pectinodon"	0.73098	0.69466	-1.1636	0.38256	0.053627
UCMP187074	Lance Formation	"Pectinodon"	0.90956	0.67448	-0.98823	0.32161	0.11579
UCMP187067	Lance Formation	"Pectinodon"	0.93607	0.78779	-1.2352	0.38121	0.05971
UCMP187068	Lance Formation	"Pectinodon"	1.2596	0.76507	-0.91561	0.19327	-0.054092
UCMP187069	Lance Formation	"Pectinodon"	0.98624	0.70103	-1.0133	0.40239	0.068698
UCMP187066	Lance Formation	"Pectinodon"	0.78003	0.83878	-1.4423	0.38001	-0.11543
UCMP187063	Lance Formation	"Pectinodon"	1.1833	0.77403	-1.0623	0.446	0.17336
UCMP187065	Lance Formation	"Pectinodon"	1.0462	0.89393	-1.4365	0.41664	0.52479
UCMP187059	Lance Formation	"Pectinodon"	1.6396	0.79102	-0.76846	0.34272	0.13762
UCMP214059	Lance Formation	"Pectinodon"	0.99603	0.93306	-1.458	-0.0043968	0.57749
UCMP186886	Lance Formation	"Pectinodon"	0.63716	0.76151	-1.3866	0.47934	-0.15421
IMG1675	Lance Formation	"Pectinodon"	0.31602	0.68186	-1.2356	-0.40546	0.31768
AMNH5731#2	Lance Formation	"Pectinodon"	0.55693	0.90057	-1.7862	0.48558	0.38761
AMNH5731#1	Lance Formation	"Pectinodon"	0.78817	0.98114	-1.8257	0.56453	0.29424
AMNH5731#3	Lance Formation	"Pectinodon"	0.7004	0.94622	-1.8028	0.52533	0.39585
AMNH5728.1	Lance Formation	"Pectinodon"	0.50399	1.3055	-1.109	0.53529	0.44117
AMNH5728.2	Lance Formation	"Pectinodon"	0.56618	0.6518	-1.2142	0.49926	0.18557
AMNH5728.3	Lance Formation	"Pectinodon"	0.58	0.67074	-1.2345	0.49902	0.13818
AMNH5719.1	Lance Formation	"Pectinodon"	0.85297	0.82897	-1.4033	0.46361	0.066093
AMNH5719.2	Lance Formation	"Pectinodon"	1.2014	0.86118	-1.2214	0.38805	0.015753
AMNH5719.3	Lance Formation	"Pectinodon"	1.1163	0.91274	-1.4083	0.46204	-0.038691
AMNH5502.1	Lance Formation	"Pectinodon"	0.5569	0.58322	-1.0877	0.54404	0.3454
AMNH5502.2	Lance Formation	"Pectinodon"	0.6175	0.88941	-1.0686	0.40302	0.31544
AMNH5502.3	Lance Formation	"Pectinodon"	1.4465	-1.3141	-1.9326	0.0020063	0.22647
AMNH5733.1	Lance Formation	"Pectinodon"	0.77015	0.9604	-1.8065	0.59426	0.42165
AMNH5706.1	Lance Formation	"Pectinodon"	1.6021	0.98222	-1.2492	0.48994	0.0054821
AMNH5706.2	Lance Formation	"Pectinodon"	1.542	0.94224	-1.199	0.50419	-0.063959
AMNH5706.3	Lance Formation	"Pectinodon"	1.4946	0.96154	-1.2547	0.42108	-0.044671
AMNH5489.1	Lance Formation	"Pectinodon"	-0.12589	0.68153	-1.7277	0.39133	0.37369
AMNH5489.2	Lance Formation	"Pectinodon"	0.40769	0.82784	-1.6907	0.40977	0.16287
AMNH5489.3	Lance Formation	"Pectinodon"	0.51146	0.91119	-1.8509	0.53084	0.38131
AMNH5725.1	Lance Formation	"Pectinodon"	0.76051	0.84634	-1.465	0.28693	0.13538
AMNH5725.2	Lance Formation	"Pectinodon"	1.1181	0.85104	-1.2076	0.18454	0.064092
AMNH5725.3	Lance Formation	"Pectinodon"	0.44865	0.87256	-1.5593	-0.51162	0.50178
AMNH5722.1	Lance Formation	"Pectinodon"	0.56353	0.73525	-1.1562	-0.55017	0.34232
AMNH5722.2	Lance Formation	"Pectinodon"	1.063	-0.58245	-1.1645	-0.63513	0.40303
AMNH5722.3	Lance Formation	"Pectinodon"	0.9069	0.10916	-1.0151	-0.61597	0.42632
IMG1672	Lance Formation	"Pectinodon"	0.4654	0.75969	-1.2741	-0.53846	0.25983
UCMP186904	"Pectinodon"	"Pectinodon"	1.4855	1.0043	-1.3908	0.49094	0.23412
UCMP128845	"Pectinodon"	"Pectinodon"	0.67527	0.57212	-0.9269	0.42371	-0.10354
UCMP128787	"Pectinodon"	"Pectinodon"	-0.11987	0.5934	-1.395	-0.046281	-0.026268
UCMP186868	"Pectinodon"	"Pectinodon"	1.3984	0.90471	-1.1639	0.26065	0.14015
UCMP186885	"Pectinodon"	"Pectinodon"	1.6372	0.88296	-0.99709	0.43674	0.11033
UALVP47985	Milk River Formation	"Richardoestesia gilmorei"	1.9821	0.022114	-0.44449	-0.035441	-0.04605
UALVP47986	Milk River Formation	"Richardoestesia gilmorei"	1.2899	0.24984	-0.28214	-0.038588	0.13135
UALVP47997	Milk River Formation	"Richardoestesia gilmorei"	1.3092	0.62351	-0.50749	-0.1029	0.17417
UALVP48038	Milk River Formation	"Richardoestesia gilmorei"	0.29674	-0.029656	0.28862	0.013848	-0.44992
UALVP48072	Milk River Formation	"Richardoestesia gilmorei"	0.2481	0.13618	-0.078553	-0.2535	0.019666
UALVP48112	Milk River Formation	"Richardoestesia gilmorei"	1.1615	-1.4625	-0.91137	0.20509	-0.36772
UALVP48115	Milk River Formation	"Richardoestesia gilmorei"	2.3763	-0.69172	-0.84799	-0.13761	-0.028321
UALVP48142	Milk River Formation	"Richardoestesia gilmorei"	2.3954	0.37285	0.78489	-0.089873	0.011857
UALVP48143	Milk River Formation	"Richardoestesia gilmorei"	2.3494	0.20323	1.1955	-0.24026	-0.39398
UALVP48158	Milk River Formation	"Richardoestesia gilmorei"	2.1978	0.70109	-0.088177	-0.057831	-0.0066734
UALVP48182	Milk River Formation	"Richardoestesia gilmorei"	1.988	-0.51265	-0.36124	-0.12192	-0.13368
UALVP48183	Milk River Formation	"Richardoestesia gilmorei"	2.4871	0.41003	0.76853	-0.15168	0.16522
UALVP48188	Milk River Formation	"Richardoestesia gilmorei"	2.0179	0.62022	-0.030117	-0.031829	-0.062387
UALVP48195	Milk River Formation	"Richardoestesia gilmorei"	2.7417	0.15411	1.5613	-0.27857	-0.14804
UALVP48196	Milk River Formation	"Richardoestesia gilmorei"	2.3517	0.46447	0.53838	0.026268	-0.24932
UALVP48212	Milk River Formation	"Richardoestesia gilmorei"	1.2547	0.070312	0.71202	-0.13825	0.023781
UALVP48213	Milk River Formation	"Richardoestesia gilmorei"	2.0896	0.26568	0.85268	-0.16782	-0.1983
UALVP48214	Milk River Formation	"Richardoestesia gilmorei"	1.739	0.58008	-0.13984	-0.021598	0.1155
UALVP48216	Milk River Formation	"Richardoestesia gilmorei"	0.36996	-0.008991	0.43591	-0.58605	-0.4212
UALVP48224	Milk River Formation	"Richardoestesia gilmorei"	2.9834	0.62872	0.5874	-0.024006	0.029817
UALVP48225	Milk River Formation	"Richardoestesia gilmorei"	2.8272	0.30178	1.2316	-0.058575	-0.10651
UALVP48247	Milk River Formation	"Richardoestesia gilmorei"	0.87449	0.27373	0.01246	-0.15879	-0.046578
UALVP48250	Milk River Formation	"Richardoestesia gilmorei"	1.8016	0.14817	0.95314	-0.31482	-0.096236
UALVP48251	Milk River Formation	"Richardoestesia gilmorei"	1.814	-0.26952	-0.20828	-0.18886	-0.06961
UALVP48252	Milk River Formation	"Richardoestesia gilmorei"	0.61276	-0.85673	-0.050828	0.45994	-0.5886
UALVP48253	Milk River Formation	"Richardoestesia gilmorei"	2.5647	-0.74041	-0.64829	-0.024101	0.089527
UALVP48259	Milk River Formation	"Richardoestesia gilmorei"	2.0591	0.50918	0.25032	-0.079031	0.052537
UALVP48266	Milk River Formation	"Richardoestesia gilmorei"	1.6725	0.55891	-0.13488	0.0070982	-0.029725
UALVP48275	Milk River Formation	"Richardoestesia gilmorei"	0.97347	0.13609	0.42667	-0.37318	0.15157
UALVP49806	Milk River Formation	"Richardoestesia gilmorei"	2.7159	-1.2216	0.090923	-0.51617	-0.12537
UALVP49807	Milk River Formation	"Richardoestesia gilmorei"	2.3103	-0.72312	-0.58807	-0.11064	-0.21456
UALVP49808	Milk River Formation	"Richardoestesia gilmorei"	1.7897	0.59592	-0.14417	0.061991	-0.17194
UALVP49809	Milk River Formation	"Richardoestesia gilmorei"	1.2192	0.49553	-0.26659	-0.21861	0.39728
UALVP49810	Milk River Formation	"Richardoestesia gilmorei"	0.92771	0.10763	0.52319	-0.5659	-0.1136
UALVP49811	Milk River Formation	"Richardoestesia gilmorei"	0.82657	-0.93723	-0.17519	-0.60901	-0.23449
UALVP49812	Milk River Formation	"Richardoestesia gilmorei"	1.4714	-0.66147	-0.42562	0.069098	-0.032947
UALVP49813	Milk River Formation	"Richardoestesia gilmorei"	0.9229	0.080674	0.53884	-0.38555	-0.15518
UALVP49814	Milk River Formation	"Richardoestesia gilmorei"	1.6178	-0.17761	-0.22609	-0.099098	-0.028688
UALVP49815	Milk River Formation	"Richardoestesia gilmorei"	2.6654	0.2721	1.1885	-0.037874	-0.16172
UALVP49816	Milk River Formation	"Richardoestesia gilmorei"	0.59219	-0.16858	0.82896	-0.25349	0.085557
UALVP49817	Milk River Formation	"Richardoestesia gilmorei"	2.1675	-0.22903	-0.66572	-0.063504	-0.067789
UALVP49818	Milk River Formation	"Richardoestesia gilmorei"	0.31496	-0.79086	0.0059516	0.044621	0.089344
UALVP49819	Milk River Formation	"Richardoestesia gilmorei"	1.747	-1.1802	-0.1096	-0.36223	-0.19408
UALVP49820	Milk River Formation	"Richardoestesia gilmorei"	0.69231	0.0079851	0.52036	-0.33432	0.085442
UALVP49821	Milk River Formation	"Richardoestesia gilmorei"	1.6864	0.34845	0.3926	-0.16123	-0.12995
UALVP49822	Milk River Formation	"Richardoestesia gilmorei"	2.2018	-0.80969	-0.7535	0.062012	0.042649
UALVP49823	Milk River Formation	"Richardoestesia gilmorei"	2.9514	-1.7477	0.35387	-0.28238	-0.37204
UALVP49824	Milk River Formation	"Richardoestesia gilmorei"	3.1886	-1.8185	-0.047351	-0.21056	-0.14293
UALVP49825	Milk River Formation	"Richardoestesia gilmorei"	2.0223	0.7526	-0.32539	-0.09796	0.23153
UALVP49826	Milk River Formation	"Richardoestesia gilmorei"	1.6038	-0.66276	-0.28102	-0.10808	-0.19894
UALVP49827	Milk River Formation	"Richardoestesia gilmorei"	1.802	0.57637	-0.082864	-0.023655	0.015633
UALVP49828	Milk River Formation	"Richardoestesia gilmorei"	2.0191	0.16618	-0.51655	-0.040161	0.02307
UALVP49829	Milk River Formation	"Richardoestesia gilmorei"	1.8028	0.38945	0.29322	0.19452	-0.15456
UALVP49830	Milk River Formation	"Richardoestesia gilmorei"	1.8928	-1.2031	-0.24702	-0.14473	-0.12933
UALVP49831	Milk River Formation	"Richardoestesia gilmorei"	1.9199	0.36138	0.52874	-0.17203	-0.23805
UALVP49832	Milk River Formation	"Richardoestesia gilmorei"	2.1324	-1.0601	-0.6815	-0.025349	0.13666
UALVP49833	Milk River Formation	"Richardoestesia gilmorei"	2.4453	-0.78403	-0.12305	-0.09424	-0.44019
UALVP49834	Milk River Formation	"Richardoestesia gilmorei"	1.9488	0.59035	-0.078364	0.17319	0.24532
UALVP49835	Milk River Formation	"Richardoestesia gilmorei"	1.0358	-0.039587	-0.36206	0.013101	-0.29876
UALVP49836	Milk River Formation	"Richardoestesia gilmorei"	0.15503	0.041916	0.02673	-0.086039	0.063417
UALVP49837	Milk River Formation	"Richardoestesia gilmorei"	2.2201	-0.54367	-0.70858	-0.19493	0.151
UALVP49838	Milk River Formation	"Richardoestesia gilmorei"	-0.21912	-0.17986	0.37747	-0.4774	-0.074678
UALVP49839	Milk River Formation	"Richardoestesia gilmorei"	2.3098	-0.63508	-0.62695	0.084369	0.15435
UALVP49840	Milk River Formation	"Richardoestesia gilmorei"	1.4991	-0.020867	-0.69734	-0.0009148	0.25266
UALVP49841	Milk River Formation	"Richardoestesia gilmorei"	1.7422	0.38936	0.28896	-0.031676	0.15871
UALVP49842	Milk River Formation	"Richardoestesia gilmorei"	1.0454	0.30362	0.075562	-0.23111	-0.23035
UALVP49843	Milk River Formation	"Richardoestesia gilmorei"	1.7972	-0.18032	-0.38179	0.10942	-0.00048947
UALVP49844	Milk River Formation	"Richardoestesia gilmorei"	1.5474	0.37488	-0.39766	0.050241	-0.10007
UALVP49845	Milk River Formation	"Richardoestesia gilmorei"	2.3093	-0.69275	-0.19657	-0.14412	-0.12431
UALVP49846	Milk River Formation	"Richardoestesia gilmorei"	2.4512	0.37777	0.82783	-0.10855	-0.18653
UALVP49847	Milk River Formation	"Richardoestesia gilmorei"	1.8217	0.25028	-0.37236	-0.023685	-0.14848
UALVP49848	Milk River Formation	"Richardoestesia gilmorei"	1.7046	0.13481	-0.40207	-0.12206	-0.063465
UALVP49849	Milk River Formation	"Richardoestesia gilmorei"	1.8753	0.139	0.0051672	0.072771	-0.17889
UALVP49850	Milk River Formation	"Richardoestesia gilmorei"	2.1713	0.46743	0.39194	0.070938	-0.11
UALVP49851	Milk River Formation	"Richardoestesia gilmorei"	2.352	0.21851	1.1207	-0.069216	-0.38498
UALVP49852	Milk River Formation	"Richardoestesia gilmorei"	2.5147	0.40838	0.74018	0.14166	-0.17866
UALVP49853	Milk River Formation	"Richardoestesia gilmorei"	2.7948	0.14345	1.6268	-0.28913	-0.20769
UALVP49854	Milk River Formation	"Richardoestesia gilmorei"	2.096	0.28663	0.82313	-0.17724	-0.37397
UALVP49855	Milk River Formation	"Richardoestesia gilmorei"	2.5403	0.52823	0.60514	-0.37876	-0.0012711
UALVP49856	Milk River Formation	"Richardoestesia gilmorei"	2.4269	0.56156	0.42352	-0.24981	-0.0022005
UALVP49857	Milk River Formation	"Richardoestesia gilmorei"	2.9073	0.38643	1.1346	-0.21055	-0.1373
UALVP49858	Milk River Formation	"Richardoestesia gilmorei"	1.2248	0.54305	-0.41413	0.016382	0.19444
UALVP49859	Milk River Formation	"Richardoestesia gilmorei"	1.1753	0.43759	-0.19251	-0.10964	0.39208
UALVP49860	Milk River Formation	"Richardoestesia gilmorei"	1.4896	-0.12961	-0.53961	-0.035232	-0.18171
UALVP49861	Milk River Formation	"Richardoestesia gilmorei"	2.4569	0.5338	0.50373	-0.23284	-0.038816
UALVP49862	Milk River Formation	"Richardoestesia gilmorei"	3.2373	-1.6812	-0.28811	-0.30977	-0.30214
UALVP49863	Milk River Formation	"Richardoestesia gilmorei"	0.64029	0.093871	0.17328	0.24724	-0.26923
UALVP49864	Milk River Formation	"Richardoestesia gilmorei"	2.0689	0.34346	0.70396	-0.33545	-0.16987
UALVP49865	Milk River Formation	"Richardoestesia gilmorei"	2.0942	-0.81686	0.4853	-0.47716	-0.26667
UALVP49866	Milk River Formation	"Richardoestesia gilmorei"	2.0217	0.44789	0.34779	0.016255	-0.086331
UALVP49867	Milk River Formation	"Richardoestesia gilmorei"	0.73286	-0.82254	-0.34128	0.1578	-0.18739
UALVP49868	Milk River Formation	"Richardoestesia gilmorei"	1.0779	0.03313	0.74529	-0.32308	-0.34855
UALVP49869	Milk River Formation	"Richardoestesia gilmorei"	1.0437	0.091332	0.55765	-0.22376	-0.18067
UALVP49870	Milk River Formation	"Richardoestesia gilmorei"	1.1489	0.20687	0.37554	-0.24826	-0.18551
UALVP49871	Milk River Formation	"Richardoestesia gilmorei"	1.1697	0.49353	-0.33066	0.032017	-0.020062
UALVP49872	Milk River Formation	"Richardoestesia gilmorei"	1.3286	0.025639	-0.30351	-0.075623	-0.09641
UALVP49873	Milk River Formation	"Richardoestesia gilmorei"	1.1475	0.13407	0.59963	-0.43821	-0.44141
UALVP49874	Milk River Formation	"Richardoestesia gilmorei"	1.3604	0.32766	0.20131	-0.010105	-0.39852
UALVP49875	Milk River Formation	"Richardoestesia gilmorei"	1.7156	-0.51372	-0.34001	0.033068	-0.29055
UALVP49876	Milk River Formation	"Richardoestesia gilmorei"	1.8625	0.22284	-0.036453	-0.10542	-0.12407
UALVP49877	Milk River Formation	"Richardoestesia gilmorei"	1.429	0.46892	-0.07507	-0.043896	-0.16639
UALVP49878	Milk River Formation	"Richardoestesia gilmorei"	2.3582	-1.1225	-0.82048	-0.052346	-0.21357
UALVP49879	Milk River Formation	"Richardoestesia gilmorei"	2.464	-1.1345	-0.45999	-0.21449	-0.12699
UALVP49880	Milk River Formation	"Richardoestesia gilmorei"	2.3035	-0.086755	0.064265	-0.21172	-0.17071
UALVP49881	Milk River Formation	"Richardoestesia gilmorei"	2.28	0.54323	0.3367	-0.10517	-0.091028
UALVP49882	Milk River Formation	"Richardoestesia gilmorei"	2.7291	-0.26204	0.25581	-0.1071	-0.14584
UALVP49883	Milk River Formation	"Richardoestesia gilmorei"	1.1824	0.11779	0.65776	-0.47845	-0.25562
UALVP49884	Milk River Formation	"Richardoestesia gilmorei"	2.6772	-0.31393	0.0021474	-0.15203	-0.096918
UALVP49885	Milk River Formation	"Richardoestesia gilmorei"	1.9721	-0.62702	-0.13446	0.0023956	-0.3252
UALVP49886	Milk River Formation	"Richardoestesia gilmorei"	2.2438	0.55652	0.33469	-0.33637	-0.017098
UALVP49887	Milk River Formation	"Richardoestesia gilmorei"	2.1865	0.30718	0.81476	-0.11112	-0.26555
UALVP49888	Milk River Formation	"Richardoestesia gilmorei"	1.8577	0.060821	1.1828	-0.32706	0.0038098
UALVP49889	Milk River Formation	"Richardoestesia gilmorei"	2.5211	-1.0987	0.22345	-0.34239	-0.25636
UALVP49890	Milk River Formation	"Richardoestesia gilmorei"	2.268	0.14984	1.2469	-0.21836	-0.25806
UALVP49891	Milk River Formation	"Richardoestesia gilmorei"	1.0813	-1.1736	-0.64826	-0.019254	-0.25993
UALVP49892	Milk River Formation	"Richardoestesia gilmorei"	1.9064	-0.039881	-0.3917	0.089096	0.035232
UALVP49893	Milk River Formation	"Richardoestesia gilmorei"	1.3318	0.41826	0.01735	-0.28818	0.089508
UALVP49894	Milk River Formation	"Richardoestesia gilmorei"	0.3432	-0.54726	-0.081222	-0.75452	-0.15844
UALVP49895	Milk River Formation	"Richardoestesia gilmorei"	0.79887	0.32855	-0.22292	0.053007	0.12503
UALVP49896	Milk River Formation	"Richardoestesia gilmorei"	1.8647	-0.95258	-0.62334	-0.041383	-0.121
UALVP49897	Milk River Formation	"Richardoestesia gilmorei"	1.1296	0.037318	0.71801	-0.13781	-0.23187
UALVP49898	Milk River Formation	"Richardoestesia gilmorei"	0.88451	0.18808	0.2272	-0.16557	-0.28578
UALVP49899	Milk River Formation	"Richardoestesia gilmorei"	0.46688	0.22735	-0.175	-0.11787	0.10523
UALVP49900	Milk River Formation	"Richardoestesia gilmorei"	1.8809	-2.1619	-0.066056	-0.52494	-0.27979
UALVP49901	Milk River Formation	"Richardoestesia gilmorei"	1.4239	0.16523	0.62822	-0.16756	-0.11546
UALVP49902	Milk River Formation	"Richardoestesia gilmorei"	1.0775	0.18669	0.31471	-0.068887	0.051976
UALVP49903	Milk River Formation	"Richardoestesia gilmorei"	1.3592	0.11283	0.6831	-0.13723	0.07628
UALVP49904	Milk River Formation	"Richardoestesia gilmorei"	0.96804	0.042199	0.697	-0.46887	-0.5065
UALVP49905	Milk River Formation	"Richardoestesia gilmorei"	1.2571	0.13682	0.63869	-0.36086	-0.29485
UALVP49906	Milk River Formation	"Richardoestesia gilmorei"	1.1227	0.18226	0.40139	-0.2233	-0.092911
UALVP49907	Milk River Formation	"Richardoestesia gilmorei"	0.82779	-0.0016521	0.60865	-0.20357	-0.048762
UALVP49908	Milk River Formation	"Richardoestesia gilmorei"	1.7952	0.24352	0.73935	-0.27762	-0.30692
UALVP49909	Milk River Formation	"Richardoestesia gilmorei"	1.6157	0.14242	0.81319	-0.23268	0.045406
UALVP49910	Milk River Formation	"Richardoestesia gilmorei"	0.97833	0.086976	0.55189	-0.40371	0.076661
UALVP49911	Milk River Formation	"Richardoestesia gilmorei"	1.9087	-0.12908	-0.18821	0.14315	-0.21653
UALVP49912	Milk River Formation	"Richardoestesia gilmorei"	1.7168	0.33414	0.4254	-0.094219	-0.078131
UALVP49913	Milk River Formation	"Richardoestesia gilmorei"	2.1411	0.39953	0.53064	0.06438	-0.19532
UALVP49914	Milk River Formation	"Richardoestesia gilmorei"	2.1807	0.49316	0.37637	-0.083985	-0.076185
UALVP49915	Milk River Formation	"Richardoestesia gilmorei"	2.1574	0.45295	0.41683	0.02052	0.06148
UALVP49916	Milk River Formation	"Richardoestesia gilmorei"	0.5866	0.1034	0.34143	-0.80773	0.25546
UALVP49917	Milk River Formation	"Richardoestesia gilmorei"	0.64555	-0.99297	-0.084601	-0.49774	-0.22457
UALVP49918	Milk River Formation	"Richardoestesia gilmorei"	0.45853	0.079335	0.21528	-0.2685	-0.34741
UALVP49919	Milk River Formation	"Richardoestesia gilmorei"	1.2203	-1.3203	-0.66266	-0.11267	-0.24767
UALVP49920	Milk River Formation	"Richardoestesia gilmorei"	1.0306	0.15697	0.39499	-0.233	-0.030458
UALVP49921	Milk River Formation	"Richardoestesia gilmorei"	0.17239	-0.28819	0.87311	-0.087661	-1.4923
UALVP49922	Milk River Formation	"Richardoestesia gilmorei"	1.1973	0.21364	0.3752	-0.19469	-0.11341
UALVP49923	Milk River Formation	"Richardoestesia gilmorei"	1.2763	0.45906	-0.12663	-0.16358	-0.15124
UALVP49924	Milk River Formation	"Richardoestesia gilmorei"	1.2189	0.24647	0.30416	-0.10072	-0.29257
UALVP49925	Milk River Formation	"Richardoestesia gilmorei"	1.8451	-0.57609	-0.55117	-0.12634	0.0108
UALVP49926	Milk River Formation	"Richardoestesia gilmorei"	1.8719	-0.59026	-0.24915	-0.1536	-0.26554
UALVP49927	Milk River Formation	"Richardoestesia gilmorei"	1.9655	-0.15589	-0.63909	0.004294	-0.042343
UALVP49928	Milk River Formation	"Richardoestesia gilmorei"	1.5677	0.47229	0.0034812	0.017748	-0.30645
UALVP49929	Milk River Formation	"Richardoestesia gilmorei"	1.9728	0.24247	0.89781	-0.535	0.10241
UALVP49930	Milk River Formation	"Richardoestesia gilmorei"	2.0022	-0.21884	-0.22968	-0.015084	-0.21412
UALVP49931	Milk River Formation	"Richardoestesia gilmorei"	1.9622	0.42129	0.36684	0.024349	-0.10538
UALVP49932	Milk River Formation	"Richardoestesia gilmorei"	2.0808	0.58144	0.098463	-0.05015	0.013127
UALVP49933	Milk River Formation	"Richardoestesia gilmorei"	2.0155	0.49879	0.20911	0.1189	-0.15865
UALVP49934	Milk River Formation	"Richardoestesia gilmorei"	1.9117	0.63424	-0.073488	0.17834	-0.20502
UALVP49935	Milk River Formation	"Richardoestesia gilmorei"	1.7825	0.61541	-0.19039	0.054315	-0.17662
UALVP49936	Milk River Formation	"Richardoestesia gilmorei"	2.5681	-0.80266	-0.4871	-0.068488	-0.053581
UALVP49937	Milk River Formation	"Richardoestesia gilmorei"	2.4786	-0.26419	-0.61017	-0.058468	-0.056897
UALVP49938	Milk River Formation	"Richardoestesia gilmorei"	2.1234	0.71007	-0.24522	0.27362	0.097363
UALVP49939	Milk River Formation	"Richardoestesia gilmorei"	2.5733	-0.064958	0.51488	-0.067952	-0.35531
UALVP49940	Milk River Formation	"Richardoestesia gilmorei"	2.4405	-0.29157	-0.30828	-0.20451	-0.082793
UALVP49941	Milk River Formation	"Richardoestesia gilmorei"	0.743	-0.6609	0.1787	-0.13853	-0.21806
UALVP49942	Milk River Formation	"Richardoestesia gilmorei"	1.3119	0.13668	0.65682	-0.34394	-0.056598
UALVP49943	Milk River Formation	"Richardoestesia gilmorei"	1.7512	0.24179	0.72268	-0.35331	-0.15019
UALVP49944	Milk River Formation	"Richardoestesia gilmorei"	2.8715	-1.1094	-0.44938	-0.31617	-0.10932
UALVP49945	Milk River Formation	"Richardoestesia gilmorei"	1.9585	0.32058	0.64492	-0.1431	-0.33811
UALVP49946	Milk River Formation	"Richardoestesia gilmorei"	3.92	-0.030352	2.8043	-0.41886	-0.30816
UALVP49947	Milk River Formation	"Richardoestesia gilmorei"	1.2104	0.53247	-0.39419	-0.044081	0.33923
UALVP49948	Milk River Formation	"Richardoestesia gilmorei"	1.1097	0.52429	-0.38216	-0.30266	0.37518
UALVP49949	Milk River Formation	"Richardoestesia gilmorei"	0.71544	0.2804	-0.089671	-0.18027	-0.2687
UALVP49950	Milk River Formation	"Richardoestesia gilmorei"	1.3697	0.19144	-0.46062	0.094982	-0.086418
UALVP49951	Milk River Formation	"Richardoestesia gilmorei"	1.2313	0.3306	0.10131	0.034956	-0.45919
UALVP49952	Milk River Formation	"Richardoestesia gilmorei"	1.3412	0.33216	0.16752	0.031061	-0.38526
UALVP49953	Milk River Formation	"Richardoestesia gilmorei"	1.8569	0.39164	0.39593	-0.12555	-0.047305
UALVP49954	Milk River Formation	"Richardoestesia gilmorei"	0.97703	-1.3441	-0.59331	0.13048	-0.39523
UALVP49955	Milk River Formation	"Richardoestesia gilmorei"	2.0588	0.02191	1.483	-0.51605	-0.52858
UALVP49956	Milk River Formation	"Richardoestesia gilmorei"	1.143	0.46915	-0.32544	0.10164	0.21528
UALVP49957	Milk River Formation	"Richardoestesia gilmorei"	0.76566	-0.38671	-0.20913	-0.4948	-0.36885
UALVP49958	Milk River Formation	"Richardoestesia gilmorei"	2.2515	0.44643	0.50882	-0.019152	-0.018189
UALVP49959	Milk River Formation	"Richardoestesia gilmorei"	2.1101	0.4215	0.42623	0.18427	-0.1098
UALVP48114	Milk River Formation	"Richardoestesia gilmorei"	1.1532	0.40238	-0.20525	0.22245	0.32187
UALVP48140	Milk River Formation	"Richardoestesia gilmorei"	2.3437	0.093592	1.441	-0.27605	-0.31652
UALVP48156	Milk River Formation	"Richardoestesia gilmorei"	1.7733	0.51977	0.034118	0.00060731	-0.23463
UALVP48157	Milk River Formation	"Richardoestesia gilmorei"	1.5884	0.24322	0.56944	-0.19645	-0.098732
UALVP48159	Milk River Formation	"Richardoestesia gilmorei"	1.7883	0.32078	0.51286	-0.14302	-0.045362
UALVP48194	Milk River Formation	"Richardoestesia gilmorei"	2.1359	0.29986	0.82332	-0.22287	-0.24437
UALVP48208	Milk River Formation	"Richardoestesia gilmorei"	-1.0938	-0.6314	0.68599	-0.17328	0.64389
UALVP48211	Milk River Formation	"Richardoestesia gilmorei"	1.983	0.39841	0.44118	0.0037406	-0.17489
UALVP48215	Milk River Formation	"Richardoestesia gilmorei"	-0.1111	-0.22744	0.60195	-0.56877	-0.45918
UALVP48217	Milk River Formation	"Richardoestesia gilmorei"	0.8133	0.1688	0.29873	-0.44908	-0.39466
UALVP48219	Milk River Formation	"Richardoestesia gilmorei"	0.90503	0.21997	0.26375	-0.5361	-0.34702
UALVP48220	Milk River Formation	"Richardoestesia gilmorei"	0.61599	-0.75058	0.055719	-0.99958	-0.35479
UALVP48276	Milk River Formation	"Richardoestesia gilmorei"	1.9454	0.41844	0.42503	-0.20647	-0.21461
UALVP50010	Milk River Formation	"Richardoestesia gilmorei"	-0.55475	-0.43555	0.65278	-0.3369	0.55417
UALVP50011	Milk River Formation	"Richardoestesia gilmorei"	1.855	-0.21636	1.8377	-0.39913	-0.30183
UALVP50012	Milk River Formation	"Richardoestesia gilmorei"	1.217	0.1956	0.44326	-0.22812	-0.21803
UALVP50013	Milk River Formation	"Richardoestesia gilmorei"	0.63535	0.045312	0.21987	0.35281	0.26761
UALVP50014	Milk River Formation	"Richardoestesia gilmorei"	2.4579	0.16594	1.312	-0.16741	-0.043915
UALVP50015	Milk River Formation	"Richardoestesia gilmorei"	2.7433	0.2791	1.2406	-0.18558	0.16609
UALVP50016	Milk River Formation	"Richardoestesia gilmorei"	0.18486	-0.11614	0.38881	-0.017795	-0.020015
UALVP50017	Milk River Formation	"Richardoestesia gilmorei"	1.1536	0.43352	-0.22456	0.0094064	0.35293
UALVP50018	Milk River Formation	"Richardoestesia gilmorei"	0.71983	0.26071	-0.045102	-0.26378	0.10239
UALVP50019	Milk River Formation	"Richardoestesia gilmorei"	3.3509	-1.2866	0.49692	-0.33174	-0.065694
UALVP50020	Milk River Formation	"Richardoestesia gilmorei"	1.517	0.17693	0.61514	0.038446	-0.13732
UALVP50021	Milk River Formation	"Richardoestesia gilmorei"	1.5521	0.23846	0.60329	-0.47947	0.25379
UALVP50022	Milk River Formation	"Richardoestesia gilmorei"	2.6893	0.28765	1.1666	-0.092859	0.10521
UALVP50023	Milk River Formation	"Richardoestesia gilmorei"	1.0746	0.4046	-0.17702	-0.11259	0.26016
UALVP50024	Milk River Formation	"Richardoestesia gilmorei"	1.0281	-0.053297	0.79084	0.099407	-0.16168
UALVP50025	Milk River Formation	"Richardoestesia gilmorei"	2.3762	0.55729	0.34333	-0.057931	0.14501
UALVP50026	Milk River Formation	"Richardoestesia gilmorei"	1.7682	0.10787	0.99361	-0.23613	0.036671
UALVP50027	Milk River Formation	"Richardoestesia gilmorei"	1.5717	0.15621	0.6641	0.067951	0.29754
UALVP48210	Milk River Formation	"Richardoestesia gilmorei"	1.8556	0.49583	0.19597	-0.37128	0.37386
UALVP48265	Milk River Formation	"Richardoestesia gilmorei"	1.7468	-0.012402	1.4031	-0.87121	0.044377
UALVP48277	Milk River Formation	"Richardoestesia gilmorei"	1.5563	0.63305	-0.34322	-0.14199	-0.0081123
UALVP50040	Milk River Formation	"Richardoestesia gilmorei"	1.8921	-0.2232	1.8864	-0.5708	0.23964
UALVP50041	Milk River Formation	"Richardoestesia gilmorei"	0.60151	0.32491	-0.32938	-0.63369	0.50261
UALVP50042	Milk River Formation	"Richardoestesia gilmorei"	0.58907	0.29317	-0.26153	-0.020941	0.057987
UALVP50043	Milk River Formation	"Richardoestesia gilmorei"	0.37769	0.23297	-0.13983	-0.13151	0.06432
UALVP50044	Milk River Formation	"Richardoestesia gilmorei"	0.56549	-0.038094	0.66777	-0.9041	0.25146
UALVP50045	Milk River Formation	"Richardoestesia gilmorei"	1.8987	0.47569	0.26501	-0.32594	0.27244
UALVP50046	Milk River Formation	"Richardoestesia gilmorei"	0.99377	-1.0912	-0.086017	-0.58208	0.046344
UALVP50047	Milk River Formation	"Richardoestesia gilmorei"	0.92229	0.31466	-0.093542	0.005252	0.055136
UMNH99-12805	Straight Cliffs Formation	"Richardoestesia gilmorei"	0.9108	2.8211	1.7413	-0.066861	-0.13495
UMNH424-14238	Straight Cliffs Formation	"Richardoestesia gilmorei"	2.3583	-0.77886	-0.024713	-0.38059	-0.17467
UMNH424-17370	Straight Cliffs Formation	"Richardoestesia gilmorei"	0.076735	2.6949	1.4588	-0.0019832	-0.2552
UMNH424-17382	Straight Cliffs Formation	"Richardoestesia gilmorei"	-0.25523	2.6284	1.3522	0.046396	0.10586
UMNH424-17220	Straight Cliffs Formation	"Richardoestesia gilmorei"	1.6828	3.1979	1.3013	0.35571	0.0060859
UMNH424-17220	Straight Cliffs Formation	"Richardoestesia gilmorei"	2.6109	-0.4571	-0.3193	-0.027113	-0.17622
UMNH424-17220	Straight Cliffs Formation	"Richardoestesia gilmorei"	0.62863	0.16315	0.35323	0.18917	-0.24321
UMNH424-17220	Straight Cliffs Formation	"Richardoestesia gilmorei"	-0.62112	2.4197	1.5758	0.042855	0.10936
TMP1986.171.0061	Oldman Formation	"Richardoestesia gilmorei"	2.1803	0.44936	0.42221	0.083245	0.10467
TMP1986.171.0009	Oldman Formation	"Richardoestesia gilmorei"	1.8613	0.30033	0.53121	0.14952	0.031006
TMP1987.080.0035	Oldman Formation	"Richardoestesia gilmorei"	-0.79916	-0.34138	0.45317	-1.0143	0.41076
TMP1996.062.0030b	Oldman Formation	"Richardoestesia gilmorei"	2.1964	0.63449	-0.030791	0.28181	0.11987
TMP1983.036.0233	Oldman Formation	"Richardoestesia gilmorei"	-1.4783	-0.75757	0.53411	0.59572	0.48048
TMP1983.036.0242	Oldman Formation	"Richardoestesia gilmorei"	0.21399	-0.29037	0.68299	0.42101	0.11051
TMP1984.092.0268	Oldman Formation	"Richardoestesia gilmorei"	0.75161	0.048469	0.4003	0.023989	-0.21454
TMP1986.023.0090	Oldman Formation	"Richardoestesia gilmorei"	-0.19989	-0.52362	0.86966	0.63545	0.22181
TMP1988.091.0028	Oldman Formation	"Richardoestesia gilmorei"	1.3034	0.22069	0.27294	0.43957	-0.074523
TMP1989.076.0063	Oldman Formation	"Richardoestesia gilmorei"	1.4154	0.25916	0.24294	0.51369	-0.066235
TMP1990.106.0006	Oldman Formation	"Richardoestesia gilmorei"	2.5692	0.27669	1.0188	0.27783	0.13381
TMP1995.157.0029	Oldman Formation	"Richardoestesia gilmorei"	3.1292	0.27653	1.477	-0.039877	0.024586
TMP1982.024.0078	Oldman Formation	"Richardoestesia gilmorei"	1.0578	-0.26567	-0.042492	0.087119	-0.30024
TMP1984.084.0247	Oldman Formation	"Richardoestesia gilmorei"	0.79506	0.01972	0.45594	0.10596	0.072811
TMP1986.023.0105	Oldman Formation	"Richardoestesia gilmorei"	1.9424	0.08371	1.0971	0.013281	0.13336
TMP1987.099.0048	Oldman Formation	"Richardoestesia gilmorei"	2.0802	0.055075	1.188	0.24832	0.25958
TMP1987.114.0005	Oldman Formation	"Richardoestesia gilmorei"	1.5575	0.21956	0.52115	0.15694	-0.19094
TMP1989.076.0083	Oldman Formation	"Richardoestesia gilmorei"	1.7897	-0.53366	-0.15971	-0.22012	-0.31524
TMP1986.171.0009	Oldman Formation	"Richardoestesia gilmorei"	1.7741	0.41572	0.25718	-0.058376	0.16755
TMP1989.036.0355	Oldman Formation	"Richardoestesia gilmorei"	-0.31598	-0.54735	0.90749	0.32818	0.43068
TMP1996.039.0026a	Oldman Formation	"Richardoestesia gilmorei"	1.4665	-0.42487	-0.46208	-0.039103	-0.23419
TMP1994.028.0001	Oldman Formation	"Richardoestesia gilmorei"	-1.1185	-1.5739	0.26286	-0.030147	-0.14612
TMP1990.082.0015	Oldman Formation	"Richardoestesia gilmorei"	-1.8029	-1.5278	0.69634	0.18932	-0.42691
TMP1983.045.0011	Oldman Formation	"Richardoestesia gilmorei"	-0.4206	-0.87105	-0.16325	-0.36967	-0.57585
TMP1983.033.0017	Oldman Formation	"Richardoestesia gilmorei"	-1.5318	2.4161	0.95657	0.13607	0.059328
TMP2000.045.0080	Oldman Formation	"Richardoestesia gilmorei"	-2.5281	-0.90081	0.61597	0.35349	-0.69571
TMP2002.045.0049	Oldman Formation	"Richardoestesia gilmorei"	1.4903	-1.063	-0.63106	-0.019108	-0.12622
TMP2002.045.0053	Oldman Formation	"Richardoestesia gilmorei"	1.4395	-1.3077	-0.63846	-0.16057	-0.39373
TMP2001.045.0082	Oldman Formation	"Richardoestesia gilmorei"	-0.23473	-0.53179	1.0443	-0.11817	0.29321
IMG1486	Lance Formation	"Richardoestesia gilmorei"	1.2128	-0.593	0.18321	-0.55512	0.26773
IMG1655	Lance Formation	"Richardoestesia gilmorei"	1.8291	-1.0155	-0.11696	-0.90605	0.32998
IMG1657	Lance Formation	"Richardoestesia gilmorei"	1.6494	-1.3226	-0.15618	-0.81098	0.14288
IMG1486	Lance Formation	"Richardoestesia gilmorei"	1.9405	-2.1472	-0.30908	-0.90635	0.085371
AMNH5396.3	Lance Formation	"Richardoestesia gilmorei"	0.84738	-1.1141	-0.25454	0.043608	-0.081086
AMNH5450	Lance Formation	"Richardoestesia gilmorei"	2.572	-3.1675	1.0203	-0.32043	0.0341
AMNH5529.3	Lance Formation	"Richardoestesia gilmorei"	0.70329	-0.2896	-0.32643	0.24133	-0.38629
AMNH5529.1	Lance Formation	"Richardoestesia gilmorei"	0.53376	-0.78355	-0.6709	-0.15021	-0.15975
AMNH5529.1a	Lance Formation	"Richardoestesia gilmorei"	0.08427	-0.42332	-0.44668	-0.070484	-0.15824
AMNH5535.3	Lance Formation	"Richardoestesia gilmorei"	0.58792	-0.16926	-0.3289	0.11036	-0.24847
AMNH5553.3	Lance Formation	"Richardoestesia gilmorei"	0.81162	-0.18054	-0.12386	0.032652	-0.43688
AMNH5553.1	Lance Formation	"Richardoestesia gilmorei"	1.1707	-1.1064	-0.59703	0.17696	-0.36852
AMNH5547	Lance Formation	"Richardoestesia gilmorei"	0.53387	0.059197	0.25002	-0.011742	-0.38163
AMNH5547.2	Lance Formation	"Richardoestesia gilmorei"	1.3893	0.1685	0.51336	0.18918	-0.15939
AMNH5547.3	Lance Formation	"Richardoestesia gilmorei"	0.96019	0.065244	0.47224	0.1458	-0.21567
AMNH5545	Lance Formation	"Richardoestesia gilmorei"	0.090029	0.11507	-0.13465	-0.18856	-0.27247
AMNH5545.2	Lance Formation	"Richardoestesia gilmorei"	0.083813	0.014946	0.071958	-0.13444	-0.27108
DSCN1694	Lance Formation	"Richardoestesia gilmorei"	0.40006	-1.9142	-0.10483	0.066123	0.08188
AMNH5749	Lance Formation	"Richardoestesia gilmorei"	0.73498	-1.0496	-0.27013	0.060829	-0.1125
AMNH5688left	Lance Formation	"Richardoestesia gilmorei"	0.52524	-1.1288	-0.45714	0.22019	-0.073617
AMNH5671.3	Lance Formation	"Richardoestesia gilmorei"	0.10787	-0.030909	0.072258	0.30752	-0.10086
AMNH1498right	Lance Formation	"Richardoestesia gilmorei"	0.61082	-1.0998	-0.36487	-0.28793	-0.056598
UCMP128941	Hell Creek Formation	"Richardoestesia gilmorei"	0.21265	0.027353	0.12066	-0.14495	-0.075077
UCMP120338	Hell Creek Formation	"Richardoestesia gilmorei"	-0.82655	-0.23813	-0.041825	0.29381	-0.78762
UCMP119921	Hell Creek Formation	"Richardoestesia gilmorei"	0.25602	0.059403	0.093126	-0.19656	-0.11827
UCMP128913	Hell Creek Formation	"Richardoestesia gilmorei"	0.03278	-0.091403	0.21735	0.033741	0.01351
UCMP120153	Hell Creek Formation	"Richardoestesia gilmorei"	0.4461	0.34846	-0.41268	-0.33714	0.20825
UCMP120287	Hell Creek Formation	"Richardoestesia gilmorei"	-0.81592	-0.1772	-0.21494	0.37697	-0.40452
UCMP123543	Hell Creek Formation	"Richardoestesia gilmorei"	-1.3261	-0.14733	-0.49438	0.1965	-1.7659
UCMP123565	Hell Creek Formation	"Richardoestesia gilmorei"	-0.037804	-0.11525	0.2272	0.047058	-0.097258
UCMP119718	Hell Creek Formation	"Richardoestesia gilmorei"	-1.3644	-0.56483	0.21221	0.75719	-0.70462
UCMP187163	Hell Creek Formation	"Richardoestesia gilmorei"	0.96781	0.16786	0.35856	-0.45775	0.37715
TMP1987.114.0005	Hell Creek Formation	"Richardoestesia gilmorei"	0.78892	2.8151	1.5558	0.41333	-0.1291
UALVP48279	Milk River Formation	"Richardoestesia isosceles"	1.8203	-0.75967	0.0034925	0.11795	0.15297
UALVP48287	Milk River Formation	"Richardoestesia isosceles"	0.37496	-1.1167	-0.1971	0.30206	-0.0046938
UALVP48290	Milk River Formation	"Richardoestesia isosceles"	-0.80017	-1.0896	0.942	0.33337	0.16538
UALVP48291	Milk River Formation	"Richardoestesia isosceles"	-0.7347	-1.412	0.83852	0.35611	0.25198
UALVP48295	Milk River Formation	"Richardoestesia isosceles"	1.4848	0.21468	0.45875	0.1514	0.23415
UALVP48312	Milk River Formation	"Richardoestesia isosceles"	-0.72642	-1.4171	0.87974	0.14187	0.70762
UALVP48323	Milk River Formation	"Richardoestesia isosceles"	3.0089	-2.1586	0.02205	-0.2591	0.04517
UALVP48324	Milk River Formation	"Richardoestesia isosceles"	-0.21979	-0.56848	0.92797	0.60574	0.59698
UALVP48325	Milk River Formation	"Richardoestesia isosceles"	-0.98053	-1.6064	1.0103	0.68042	0.57825
UALVP48326	Milk River Formation	"Richardoestesia isosceles"	1.0736	-2.0891	0.23112	-0.042491	0.16458
UALVP48327	Milk River Formation	"Richardoestesia isosceles"	-2.2172	-1.5579	1.3025	0.34208	0.58971
UALVP48328	Milk River Formation	"Richardoestesia isosceles"	1.3687	-0.32807	1.639	0.017836	0.064597
UALVP48329	Milk River Formation	"Richardoestesia isosceles"	-0.73279	-0.92786	0.58258	0.21792	0.38485
UALVP48330	Milk River Formation	"Richardoestesia isosceles"	-2.1844	-1.283	1.3048	0.39468	0.20576
UALVP48331	Milk River Formation	"Richardoestesia isosceles"	-1.6133	-0.72529	0.89903	0.71674	0.51666
UALVP48343	Milk River Formation	"Richardoestesia isosceles"	-2.4284	-1.9921	1.2656	0.42379	0.42409
UALVP48344	Milk River Formation	"Richardoestesia isosceles"	0.79024	-2.2733	0.39888	0.096192	0.51437
UALVP48345	Milk River Formation	"Richardoestesia isosceles"	2.0402	0.17289	0.95625	0.012086	0.24341
UALVP48355	Milk River Formation	"Richardoestesia isosceles"	1.3872	-2.3306	1.1821	0.20509	0.55577
UALVP50136	Milk River Formation	"Richardoestesia isosceles"	1.3775	-1.4653	0.10876	0.23063	0.26692
UALVP50137	Milk River Formation	"Richardoestesia isosceles"	2.5505	0.148	1.4149	-0.16024	-0.089034
UALVP50138	Milk River Formation	"Richardoestesia isosceles"	-0.77012	-3.5915	-0.085299	0.48314	0.69333
UALVP50139	Milk River Formation	"Richardoestesia isosceles"	1.0615	-0.47706	0.26577	0.41918	0.35748
UALVP50140	Milk River Formation	"Richardoestesia isosceles"	1.7134	-0.35113	1.9512	-0.05858	-0.13153
UALVP50141	Milk River Formation	"Richardoestesia isosceles"	2.4343	0.04871	1.4998	0.050325	0.047395
UALVP50142	Milk River Formation	"Richardoestesia isosceles"	0.75707	-0.58976	0.34485	0.32687	0.23677
UALVP50143	Milk River Formation	"Richardoestesia isosceles"	1.182	-0.04718	0.90668	0.0022548	-0.2134
UALVP50144	Milk River Formation	"Richardoestesia isosceles"	3.5833	-0.078153	2.6597	-0.32356	-0.24807
UALVP50145	Milk River Formation	"Richardoestesia isosceles"	0.8657	-1.6692	0.69125	0.1378	0.4734
UALVP50146	Milk River Formation	"Richardoestesia isosceles"	2.8376	0.022168	1.8218	0.098416	-0.038765
UALVP50147	Milk River Formation	"Richardoestesia isosceles"	2.2831	0.1001	1.3529	-0.17565	-0.17705
UALVP50148	Milk River Formation	"Richardoestesia isosceles"	1.2801	0.030844	0.64751	0.53996	0.091908
UALVP50149	Milk River Formation	"Richardoestesia isosceles"	1.6557	-0.44149	0.38604	-0.10589	0.057614
UALVP50150	Milk River Formation	"Richardoestesia isosceles"	-0.021325	-0.59144	1.2454	0.17464	0.34567
UALVP50151	Milk River Formation	"Richardoestesia isosceles"	-0.44894	-0.29677	0.2505	0.38484	0.32817
UALVP50152	Milk River Formation	"Richardoestesia isosceles"	2.3349	-1.5421	-0.44674	-0.17485	-0.089882
UALVP50153	Milk River Formation	"Richardoestesia isosceles"	2.0231	-2.238	0.14807	-0.42447	0.15084
UALVP50154	Milk River Formation	"Richardoestesia isosceles"	-1.5355	-2.11	0.74926	0.23744	0.28597
UALVP50155	Milk River Formation	"Richardoestesia isosceles"	0.32019	-1.4514	0.71242	0.33277	0.39103
UALVP50156	Milk River Formation	"Richardoestesia isosceles"	0.03902	-1.1917	0.18629	0.24343	0.52212
UALVP50157	Milk River Formation	"Richardoestesia isosceles"	1.5132	-1.5844	0.2338	-0.18076	0.094219
UALVP50158	Milk River Formation	"Richardoestesia isosceles"	1.7037	0.013153	1.0899	-0.022519	0.36927
UALVP50159	Milk River Formation	"Richardoestesia isosceles"	3.2527	-0.010012	2.3011	-0.38922	-0.22249
UALVP50160	Milk River Formation	"Richardoestesia isosceles"	2.5872	-0.52988	-0.13495	-0.18878	-0.14035
UALVP50161	Milk River Formation	"Richardoestesia isosceles"	0.35679	-1.7812	0.39797	0.061941	0.37821
UALVP50162	Milk River Formation	"Richardoestesia isosceles"	1.7788	-2.4052	-0.2278	-0.40309	0.3117
UALVP50163	Milk River Formation	"Richardoestesia isosceles"	0.48475	0.1273	-0.054615	0.22809	0.60874
UALVP50164	Milk River Formation	"Richardoestesia isosceles"	0.25992	-1.073	0.19703	0.20711	0.42588
UALVP48187	Milk River Formation	"Richardoestesia isosceles"	1.9594	0.42057	0.40725	-0.067073	-0.40483
UALVP48207	Milk River Formation	"Richardoestesia isosceles"	0.86335	-0.11995	0.69938	0.57987	0.056309
UALVP48218	Milk River Formation	"Richardoestesia isosceles"	0.36503	-0.5216	-0.10221	-0.7884	-0.37985
UALVP48222	Milk River Formation	"Richardoestesia isosceles"	2.3346	0.18663	1.2118	-0.20852	-0.34303
UALVP48227	Milk River Formation	"Richardoestesia isosceles"	2.3095	0.47896	0.44556	0.11884	-0.092018
UALVP48228	Milk River Formation	"Richardoestesia isosceles"	0.3674	-0.48809	0.47463	-0.054999	0.085766
UALVP48229	Milk River Formation	"Richardoestesia isosceles"	0.73666	-0.25577	1.0613	-0.053293	0.25301
UALVP48269	Milk River Formation	"Richardoestesia isosceles"	1.1087	-0.0639	0.7616	0.40441	0.36243
UALVP50199	Milk River Formation	"Richardoestesia isosceles"	2.1184	0.25684	0.80294	0.068169	0.30745
UALVP50200	Milk River Formation	"Richardoestesia isosceles"	2.2368	0.23988	0.90367	0.1479	0.25423
UALVP50201	Milk River Formation	"Richardoestesia isosceles"	0.69925	-0.070077	0.62526	-0.083704	0.30064
UALVP50202	Milk River Formation	"Richardoestesia isosceles"	2.415	-0.6741	0.24294	-0.0078314	0.09663
UALVP50203	Milk River Formation	"Richardoestesia isosceles"	2.7118	-2.0202	0.10595	-0.28079	-0.19069
UALVP50204	Milk River Formation	"Richardoestesia isosceles"	3.2179	-1.5802	0.35425	-0.26724	0.077388
UALVP50205	Milk River Formation	"Richardoestesia isosceles"	2.0099	0.3843	0.46607	0.056574	0.015621
UALVP50206	Milk River Formation	"Richardoestesia isosceles"	2.526	-0.92623	0.33665	-0.064734	-0.12252
UALVP50207	Milk River Formation	"Richardoestesia isosceles"	2.6957	0.16434	1.4618	-0.10039	-0.10838
UALVP50208	Milk River Formation	"Richardoestesia isosceles"	0.16828	-1.2768	1.5577	0.051716	0.22205
UALVP50209	Milk River Formation	"Richardoestesia isosceles"	2.6168	0.055493	1.7089	-0.2511	-0.42288
UMNH424-17371	Straight Cliffs Formation	"Richardoestesia isosceles"	1.1869	-2.2292	0.23692	0.083162	0.31785
UMNH424-14403	Straight Cliffs Formation	"Richardoestesia isosceles"	2.3415	-0.061545	1.6924	-0.027096	0.22794
UMNH424-17220	Straight Cliffs Formation	"Richardoestesia isosceles"	1.3263	-1.4556	-0.95247	0.080768	0.47099
UMNH424-17220	Straight Cliffs Formation	"Richardoestesia isosceles"	1.9418	-0.2494	1.885	-0.1339	0.020948
TMP1986.159.0062	Oldman Formation	"Richardoestesia isosceles"	0.36892	-0.11048	0.38946	0.39848	0.10761
TMP1990.079.0031	Oldman Formation	"Richardoestesia isosceles"	1.1222	-0.084639	0.8421	0.33613	0.22651
TMP1995.177.0049a	Oldman Formation	"Richardoestesia isosceles"	1.1717	-0.51695	1.7794	0.63149	0.080212
TMP1995.180.0005a	Oldman Formation	"Richardoestesia isosceles"	2.6684	-0.18065	2.1424	0.14946	0.090189
TMP1995.180.0005b	Oldman Formation	"Richardoestesia isosceles"	0.63861	1.2632	-2.6243	0.69444	0.87786
TMP1996.048.0011	Oldman Formation	"Richardoestesia isosceles"	1.4883	0.14343	0.66215	0.0065006	0.13351
TMP1996.062.0030a	Oldman Formation	"Richardoestesia isosceles"	-0.60724	-0.63357	0.69063	1.0998	0.87168
TMP1989.103.0025	Oldman Formation	"Richardoestesia isosceles"	0.096188	-0.20187	0.76412	-0.97688	-0.15768
TMP1995.177.0079	Oldman Formation	"Richardoestesia isosceles"	3.1109	0.086104	1.9087	-0.03304	-0.29195
TMP1986.172.0053	Oldman Formation	"Richardoestesia isosceles"	3.1254	0.096787	1.8996	-0.050243	-0.30634
TMP1984.001.0012	Dinosaur Park Formation	"Richardoestesia isosceles"	-0.95691	-0.6441	0.66086	0.50969	0.28807
TMP1986.023.0105	Dinosaur Park Formation	"Richardoestesia isosceles"	1.6613	0.058828	0.88831	0.29635	0.25986
TMP1986.033.0054	Dinosaur Park Formation	"Richardoestesia isosceles"	1.8263	0.27627	0.56478	0.089824	0.21766
TMP1986.045.0046	Dinosaur Park Formation	"Richardoestesia isosceles"	1.923	-0.089126	1.4598	0.055465	0.14675
TMP1988.036.0199	Dinosaur Park Formation	"Richardoestesia isosceles"	-0.021728	-0.43443	0.809	0.52946	0.31598
TMP1995.181.0010	Dinosaur Park Formation	"Richardoestesia isosceles"	0.62006	-0.089378	0.54758	0.18517	0.33983
TMP1996.142.0019	Dinosaur Park Formation	"Richardoestesia isosceles"	0.28556	-0.35252	0.76603	0.71989	0.61168
TMP1987.158.0076	Dinosaur Park Formation	"Richardoestesia isosceles"	2.4547	0.19742	1.1993	0.075598	-0.35616
TMP1984.092.0205	Dinosaur Park Formation	"Richardoestesia isosceles"	3.119	0.10623	1.8861	-0.077991	-0.39052
TMP1986.021.0068	Dinosaur Park Formation	"Richardoestesia isosceles"	2.7877	-0.048186	2.0256	-0.19992	-0.14845
TMP1995.174.0052	Dinosaur Park Formation	"Richardoestesia isosceles"	3.2474	0.17281	1.8396	-0.16012	-0.33734
TMP1995.181.0010c	Dinosaur Park Formation	"Richardoestesia isosceles"	2.8994	0.002417	1.9669	-0.059441	-0.38221
TMP1995.181.0060e	Dinosaur Park Formation	"Richardoestesia isosceles"	3.4363	0.22569	1.8132	-0.071565	-0.13411
TMP1995.181.0060f	Dinosaur Park Formation	"Richardoestesia isosceles"	3.1832	0.13952	1.8629	-0.11906	-0.36393
BB86uncat.	Dinosaur Park Formation	"Richardoestesia isosceles"	1.0209	-0.21745	1.2525	-0.37414	0.10739
p741067no1	Dinosaur Park Formation	"Richardoestesia isosceles"	0.80381	-0.16125	-0.77185	-0.40194	0.6221
p741067no2	Dinosaur Park Formation	"Richardoestesia isosceles"	0.17907	0.27497	-0.49694	-0.10027	0.41522
p741067no3	Dinosaur Park Formation	"Richardoestesia isosceles"	0.18412	0.19987	-0.85808	-0.24381	0.13378
p83331	Dinosaur Park Formation	"Richardoestesia isosceles"	-0.58205	-0.05746	-0.27768	0.18553	-0.44456
p8219366	Dinosaur Park Formation	"Richardoestesia isosceles"	0.14741	0.27968	-0.5366	-0.05235	0.35494
p83368no3	Dinosaur Park Formation	"Richardoestesia isosceles"	0.29044	-0.17698	0.59626	-0.040437	0.055871
p663182	Dinosaur Park Formation	"Richardoestesia isosceles"	-0.34138	0.12745	-0.56016	0.15546	0.15032
nmckno23b	Dinosaur Park Formation	"Richardoestesia isosceles"	-1.5162	-0.44348	-0.18147	0.81139	-0.58083
hjohnson4	Dinosaur Park Formation	"Richardoestesia isosceles"	0.91468	0.55318	-0.53533	-0.54135	0.64691
LSUMG489:6237	Aguja Formation	"Richardoestesia isosceles"	2.6493	0.31473	1.122	-0.18665	-0.2171
LSUMG489:6235	Aguja Formation	"Richardoestesia isosceles"	2.9944	0.21938	1.5101	0.014505	-0.11277
LSUMG489:6050	Aguja Formation	"Richardoestesia isosceles"	2.5484	0.22781	1.2149	-0.13258	0.12572
LSUMG741:5933	Aguja Formation	"Richardoestesia isosceles"	2.5617	0.46937	0.70509	-0.17351	-0.066724
LSUMG113:5939	Aguja Formation	"Richardoestesia isosceles"	2.7444	-0.080236	2.0531	-0.14831	-0.10526
UCMP213984	Lance Formation	"Richardoestesia isosceles"	-0.29442	-0.38291	0.58239	0.35369	-0.13438
UCMP214012	Lance Formation	"Richardoestesia isosceles"	0.10528	-0.17247	0.43355	0.090093	0.01076
UCMP187102	Lance Formation	"Richardoestesia isosceles"	1.2418	-0.011952	0.95435	-0.47946	0.2916
UCMP214013	Lance Formation	"Richardoestesia isosceles"	1.4618	0.030126	0.90913	-0.053104	0.1896
UCMP214016	Lance Formation	"Richardoestesia isosceles"	1.8261	0.14353	0.94391	-0.13229	-0.23673
UCMP214020	Lance Formation	"Richardoestesia isosceles"	2.1039	-0.33399	2.2429	-0.32161	-0.21818
UCMP214021	Lance Formation	"Richardoestesia isosceles"	1.6013	-0.18172	1.512	-0.11776	-0.13455
UCMP214022	Lance Formation	"Richardoestesia isosceles"	0.69291	-0.24257	0.94506	0.25558	-0.038192
UCMP214023	Lance Formation	"Richardoestesia isosceles"	0.99113	-0.094787	0.8318	0.17877	-0.034313
UCMP214035	Lance Formation	"Richardoestesia isosceles"	2.1126	0.2242	0.89669	0.047592	-0.01081
UCMP214039	Lance Formation	"Richardoestesia isosceles"	0.69831	0.063969	0.27912	0.081857	0.38402
UCMP214043	Lance Formation	"Richardoestesia isosceles"	0.7221	-0.23334	0.95536	0.15482	0.17506
LanceRichardo	Lance Formation	"Richardoestesia isosceles"	-0.64255	-0.91693	0.79557	0.86154	0.52749
AMNH5366	Lance Formation	"Richardoestesia isosceles"	-0.91485	-1.5359	0.96875	0.55227	0.28159
AMNH5370	Lance Formation	"Richardoestesia isosceles"	-1.1415	-1.3902	0.82618	0.75404	0.73293
AMNH5370.2	Lance Formation	"Richardoestesia isosceles"	-0.84204	-1.8143	0.67272	0.79987	0.89484
AMNH5376.1	Lance Formation	"Richardoestesia isosceles"	-1.6494	-2.0962	1.1811	1.1865	0.77756
AMNH5376.2	Lance Formation	"Richardoestesia isosceles"	-0.90589	-1.6607	1.1795	0.86024	0.64439
AMNH5380.1	Lance Formation	"Richardoestesia isosceles"	-1.476	-1.6955	1.1464	0.9491	0.74522
AMNH5380.2	Lance Formation	"Richardoestesia isosceles"	-0.93849	-1.094	0.90384	0.93211	0.97651
AMNH5382.1	Lance Formation	"Richardoestesia isosceles"	-2.2306	-2.05	1.0806	1.2986	0.67695
AMNH5382.2	Lance Formation	"Richardoestesia isosceles"	-2.2974	-1.9175	1.2373	1.0787	0.52326
AMNH5386.3	Lance Formation	"Richardoestesia isosceles"	-0.18874	-1.5526	0.068734	0.23198	0.12054
AMNH5386.2	Lance Formation	"Richardoestesia isosceles"	-0.15264	-0.68448	1.2282	0.64993	0.70102
AMNH5386.2	Lance Formation	"Richardoestesia isosceles"	-1.2617	-1.246	0.9674	1.0246	0.85621
AMNH5390.2	Lance Formation	"Richardoestesia isosceles"	0.059603	-1.5007	0.28286	0.24705	-0.0117
AMNH5390.3	Lance Formation	"Richardoestesia isosceles"	1.5584	-3.8431	0.79645	-0.15651	0.24534
AMNH5390.1	Lance Formation	"Richardoestesia isosceles"	0.93143	-0.88695	-0.36603	-0.413	0.28255
AMNH5556.1	Lance Formation	"Richardoestesia isosceles"	-1.7331	-2.0446	1.2981	1.7822	0.41988
AMNH5556.2	Lance Formation	"Richardoestesia isosceles"	-1.9836	-1.8579	0.89516	1.8121	0.31922
UCMP186837	Hell Creek Formation	"Richardoestesia isosceles"	1.179	-0.4706	1.893	-0.19188	-0.10503
UCMP186842	Hell Creek Formation	"Richardoestesia isosceles"	1.3122	0.071672	0.71542	-0.026559	0.098635
UCMP186825	Hell Creek Formation	"Richardoestesia isosceles"	0.30212	-0.46928	1.1573	0.27517	0.44422
UCMP213927	Hell Creek Formation	"Richardoestesia isosceles"	0.66274	0.064177	0.25539	0.15487	0.086598
UCMP213933	Hell Creek Formation	"Richardoestesia isosceles"	1.2164	0.07345	0.7002	-0.19059	-0.1068
UCMP213935	Hell Creek Formation	"Richardoestesia isosceles"	1.5835	0.21552	0.61313	-0.20802	0.1906
UCMP213951	Hell Creek Formation	"Richardoestesia isosceles"	-0.57935	-0.99326	1.5595	1.006	0.50725
UCMP213953	Hell Creek Formation	"Richardoestesia isosceles"	0.12326	-0.43697	0.95324	0.40247	0.14001
UCMP213960	Hell Creek Formation	"Richardoestesia isosceles"	-0.0031676	-0.48612	0.99241	0.34555	0.14612
UCMP213972	Hell Creek Formation	"Richardoestesia isosceles"	-0.017917	-0.53231	1.1734	0.029243	-0.019838
UCMP213975	Hell Creek Formation	"Richardoestesia isosceles"	-0.3687	-0.50139	0.83609	0.17889	-0.059995
UCMP213994	Hell Creek Formation	"Richardoestesia isosceles"	1.5434	-0.22445	1.5487	-0.048948	-0.076959
UCMP213995	Hell Creek Formation	"Richardoestesia isosceles"	-0.16387	-0.16615	0.14932	0.35462	0.43248
UCMP213997	Hell Creek Formation	"Richardoestesia isosceles"	1.4668	-0.25099	1.5737	-0.12973	-0.029863
UCMP186842	Hell Creek Formation	"Richardoestesia isosceles"	1.4125	-0.10185	1.1592	0.015799	0.11661
UCMP123525	Hell Creek Formation	"Richardoestesia isosceles"	0.91144	-0.51981	1.7514	0.1777	-0.38214
UCMP186840	Hell Creek Formation	"Richardoestesia isosceles"	-0.50561	-0.47873	0.66924	0.26093	0.0174
UCMP213980	Hell Creek Formation	"Richardoestesia isosceles"	1.046	0.2465	0.12311	0.047529	0.18685
NMMNHP-27481	Point Lookout Sandstone	Dromaeosauridae	-1.4716	-0.27639	0.27561	-0.28379	-0.17269
NMMNHP-25054	Menefee Formation	cf. Dromaeosauridae M A	0.17715	3.2616	0.41297	-0.64675	-0.21962
NMMNHP-27487	Fruitland/Kirtland Fm.	Dromaeosauridae M A	-0.3046	2.9377	0.40189	0.84118	0.6127
NMMNHP-27559	Fruitland/Kirtland Fm.	Dromaeosauridae M A	-1.1723	-1.0388	-0.1133	-0.19129	-0.42693
NMMNHP-30001	Fruitland/Kirtland Fm.	Dromaeosauridae M A	-1.3143	2.6107	0.63262	0.23134	0.22824
NMMNHP-30002	Fruitland/Kirtland Fm.	Dromaeosauridae M A	-0.76841	2.7975	0.48967	0.57756	0.30196
NMMNHP-30003	Fruitland/Kirtland Fm.	Dromaeosauridae M A	-0.053248	3.1923	0.17496	0.24426	0.13425
NMMNHP-30330	Fruitland/Kirtland Fm.	Dromaeosauridae M A	0.43856	3.0124	0.90587	0.32521	-0.1882
NMMNHP-38027	Fruitland/Kirtland Fm.	Dromaeosauridae M A	-0.20096	-0.30287	0.66607	-0.41023	-0.36091
NMMNHP-38425	Fruitland/Kirtland Fm.	Dromaeosauridae M A	0.18536	2.8319	0.93851	0.97374	0.52576
NMMNHP-49808	Fruitland/Kirtland Fm.	Dromaeosauridae M A	-1.4307	0.15565	-0.021198	-0.41198	-0.81546
NMMNHP-66896	Fruitland/Kirtland Fm.	Dromaeosauridae M A	-0.91078	-0.47101	-0.17663	0.084754	0.28372
NMMNHP-07189	Fruitland/Kirtland Fm.	Dromaeosauridae M A	-1.3042	0.26418	0.41026	-0.86884	0.7062
NMMNHP-30223	Fruitland/Kirtland Fm.	Dromaeosauridae M A	-0.24065	-0.14416	0.25603	-0.36621	-0.07424
NMMNHP-30227	Fruitland/Kirtland Fm.	Dromaeosauridae M A	0.77756	0.1003	-0.45369	0.54293	0.49568
NMMNHP-30232	Fruitland/Kirtland Fm.	Dromaeosauridae M A	-1.0596	0.57326	-0.21523	-0.23939	-0.21542
NMMNHP-33144	Fruitland/Kirtland Fm.	Dromaeosauridae M A	-1.2086	2.5816	0.7852	0.24184	-0.087562
NMMNHP-33145	Fruitland/Kirtland Fm.	Dromaeosauridae M A	0.15194	0.50686	-0.60403	0.43298	0.39633
NMMNHP-33146	Fruitland/Kirtland Fm.	Dromaeosauridae M A	0.034997	-0.074774	0.18439	0.08653	-0.24127
NMMNHP-33473	Fruitland/Kirtland Fm.	Dromaeosauridae M A	0.23069	0.16744	-0.27289	0.14404	0.27508
NMMNHP-33475	Fruitland/Kirtland Fm.	Dromaeosauridae M A	-1.2805	2.4756	1.0091	0.14387	-0.26403
NMMNHP-33476	Fruitland/Kirtland Fm.	Dromaeosauridae M A	0.53097	3.2381	0.443	0.33693	0.081133
NMMNHP-33486	Fruitland/Kirtland Fm.	Dromaeosauridae M A	-0.8409	-0.32693	0.37072	-0.70004	-0.47461
NMMNHP-22578	Fruitland/Kirtland Fm.	Dromaeosauridae M A	-0.43108	-0.46009	0.094496	0.27334	-0.067372
NMMNHP-26205	Fruitland/Kirtland Fm.	Dromaeosauridae M A	-1.3197	-0.19702	-0.48635	0.159	-0.080553
NMMNHP-32752	Fruitland/Kirtland Fm.	Dromaeosauridae M A	-1.5187	0.59365	-0.10859	0.090622	0.31796
NMMNHP-68395	Fruitland/Kirtland Fm.	Dromaeosauridae M A	-0.1915	0.65459	-0.89571	-0.55223	-0.051081
NMMNHP-32814	Naashoibito Member	Dromaeosauridae M A	0.73759	-0.67641	-0.84442	-0.083635	-0.034253
NMMNHP-33148	Fruitland/Kirtland Fm.	Dromaeosauridae M B	-1.2937	1.5528	-0.27393	-0.40376	0.40849
NMMNHP-38410	Fruitland/Kirtland Fm.	Richardoestesia sp.	2.077	2.2451	3.5541	0.81095	0.51727
NMMNHP-52501	Fruitland/Kirtland Fm.	Richardoestesia sp.	-0.34998	2.422	1.6773	0.39998	-0.10131
NMMNHP-52503	Fruitland/Kirtland Fm.	Richardoestesia sp.	3.2107	2.9879	2.7815	0.42096	-0.10495
NMMNHP-52514	Fruitland/Kirtland Fm.	Richardoestesia sp.	1.2943	2.2982	3.1229	-0.2494	1.3125
NMMNHP-27495	Fruitland/Kirtland Fm.	Richardoestesia sp.	-0.44502	2.3945	1.6971	0.31916	-0.13314
NMMNHP-30004	Fruitland/Kirtland Fm.	Richardoestesia sp.	0.48313	2.6661	1.7818	0.073252	-0.34768
NMMNHP-30005	Fruitland/Kirtland Fm.	Richardoestesia sp.	-0.017988	2.5192	1.6101	0.65555	0.04168
NMMNHP-30331	Fruitland/Kirtland Fm.	Richardoestesia sp.	0.17572	2.2544	2.4337	0.24967	-0.00030504
NMMNHP-27496	Fruitland/Kirtland Fm.	Richardoestesia sp.	-0.14027	2.3213	2.0643	0.3129	-0.10813
NMMNHP-30208	Fruitland/Kirtland Fm.	Richardoestesia sp.	0.72274	2.523	2.224	0.15036	-0.03707
NMMNHP-30209	Fruitland/Kirtland Fm.	Richardoestesia sp.	0.70085	2.7353	1.4723	1.0905	0.49194
NMMNHP-33482	Fruitland/Kirtland Fm.	Richardoestesia sp.	2.282	-3.0733	-1.2615	-0.24461	-0.24016
NMMNHP-32753	Fruitland/Kirtland Fm.	Richardoestesia sp.	0.97256	-1.0289	0.051332	0.095284	0.066575
NMMNHP-37793	Fruitland/Kirtland Fm.	Richardoestesia sp.	1.5217	0.043565	0.75261	0.57786	0.3902
NMMNHP-32742	Fruitland/Kirtland Fm.	Richardoestesia sp.	1.6556	2.0427	3.8571	0.31808	0.33969
NMMNHP-46389	Fruitland/Kirtland Fm.	Richardoestesia sp.	0.76283	0.35508	0.12243	0.54091	0.30515
NMMNHP-68396	Kirtland Formation	Troodontidae	-2.0223	1.4213	-0.86909	-0.84193	-0.59304
NMMNHP-22566	Naashoibito Member	Troodontidae	-2.476	2.607	-0.015412	-0.12997	-0.26708
NMMNHP-32772	Naashoibito Member	Troodontidae	-2.598	-0.29571	-0.87282	-0.74149	-0.28585
NMMNHP-33521	Naashoibito Member	Troodontidae	-0.75333	3.2328	-0.31219	-0.056529	0.18179

## Sheet: DFA Drom A
DROMAEOSAURIDAE MORPHOTYPE A: NEW MEXICO SPECIMENS VS. DINOSAUR PARK FM. SPECIMENS
"Saurornitholestinae" = Dromaeosauridae Morphotype A							DFA Results of entire dataset: 70.44% correctly identified, p(same)=0.0008037					DFA Results when only teeth with 3/5 measurements included: 79.43% correctly identified, p(same)=0.00002251
	FABL	CH	BW	ADM	PDM		0	Score	Group	Classif.		0	Score	Group	Classif.
NMMNH P-27481	5.21	8.77	2.65	6	5		3	-0.47019	1	2		3	-0.34404	1	2
NMMNH P-25054	3.01	1.38	?	0	5		4	2.5168	1	1		4	4.5211	1	1
NMMNH P-26240	?	?	?	?	18		5	3.2889	1	1		7	2.1891	1	1
NMMNH P-27486	?	?	?	?	5		6	-0.033979	1	2		8	-1.8275	1	2
NMMNH P-27487	2.67	?	1.28	0	4		7	1.9156	1	1		9	2.6419	1	1
NMMNH P-27559	5.46	8.57	2.45	8	5		8	-1.2387	1	2		10	2.1394	1	1
NMMNH P-30001	3.95	7.1	2.07	0	4		9	1.6577	1	1		11	2.8666	1	1
NMMNH P-30002	3.42	?	1.6	0	4		10	1.6956	1	1		12	3.5181	1	1
NMMNH P-30003	2.88	3.83	1.41	0	4		11	2.0814	1	1		13	1.0542	1	1
NMMNH P-30330	3.03	3.64	1.18	0	6		12	2.5042	1	1		14	2.7485	1	1
NMMNH P-38027	4.48	?	2.21	?	7		13	0.51137	1	1		17	-0.8995	1	2
NMMNH P-38425	2.5	?	1.04	0	5.5		14	2.3187	1	1		18	-1.1188	1	2
NMMNH P-38431	?	?	?	?	5		15	-0.033979	1	2		19	1.3094	1	1
NMMNH P-38432	?	?	?	6	4.6		16	-0.4145	1	2		22	0.78048	1	1
NMMNH P-49808	5.8	?	2.5	5.5	4.5		17	-0.68014	1	2		25	-1.1317	1	2
NMMNH P-66896	4.27	9.07	2.25	7	4.5		18	-0.65994	1	2		26	-0.38364	1	2
NMMNH P-07189	?	8.29	3.11	5	5		19	0.22072	1	1		30	-0.4352	1	2
NMMNH P-30220	?	?	0.54	?	?		20	-0.4102	1	2		31	-0.27409	1	2
NMMNH P-30222	?	?	?	?	3.5		21	-0.41739	1	2		32	2.3433	1	1
NMMNH P-30223	4.08	?	2.2	?	6		22	0.40205	1	1		33	-1.0682	1	2
NMMNH P-30225	4.01	?	2.01	?	?		23	0.036817	1	1		34	0.15016	1	1
NMMNH P-30226	?	?	?	4.5	3.5		24	-0.20898	1	2		36	0.38382	1	1
NMMNH P-30227	2.58	?	1.21	7	5		25	-0.079326	1	2		38	2.5235	1	1
NMMNH P-30228	3.65	?	1.69	?	?		26	0.11245	1	1		39	3.3034	1	1
NMMNH P-30229	3.27	?	1.47	?	?		27	0.21349	1	1		43	0.98166	1	1
NMMNH P-30230	?	?	?	0	6		28	1.8901	1	1		45	-1.0756	1	2
NMMNH P-30231	?	?	?	?	4		29	-0.28959	1	2		47	-1.7576	1	2
NMMNH P-30232	4.67	?	2.3	5	4		30	-0.2634	1	2		48	-0.15842	1	2
NMMNH P-32831	4.3	?	?	?	4.5		31	-0.086962	1	2		49	-0.25831	1	2
NMMNH P-33144	4.28	?	1.97	0	4.5		32	1.5716	1	1		50	-1.7668	1	2
NMMNH P-33145	3.05	?	1.46	6	4		33	-0.13944	1	2		51	-0.91958	2	2
NMMNH P-33146	4.11	?	1.74	?	6		34	0.30807	1	1		52	-1.2339	2	2
NMMNH P-33149	?	?	?	7	4		35	-0.89233	1	2		53	1.0392	2	1
NMMNH P-33473	3.22	6.51	1.66	?	5		36	0.46768	1	1		54	1.0409	2	1
NMMNH P-33474	?	?	?	6	5		37	-0.31226	1	2		55	0.63763	2	1
NMMNH P-33475	4.59	?	2.06	0	5		38	1.6009	1	1		56	1.0942	2	1
NMMNH P-33476	2.52	3.21	1.12	0	5		39	2.4458	1	1		57	-0.46164	2	2
NMMNH P-33477	?	?	1.36	?	?		40	-0.26247	1	2		58	-0.14409	2	2
NMMNH P-33484	3.76	?	1.77	?	?		41	0.086135	1	1		59	1.1959	2	1
NMMNH P-33485	?	?	?	7	4		42	-0.89233	1	2		60	1.0023	2	1
NMMNH P-33486	5.05	6.66	2.61	?	6		43	0.21022	1	1		61	0.53856	2	1
NMMNH P-33487	?	?	?	8	4.5		44	-1.089	1	2		62	-0.6791	2	2
NMMNH P-22578	4.38	8.37	1.88	7	5.5		45	-0.48037	1	2		63	-0.43622	2	2
NMMNH P-26201	?	?	?	5	4		46	-0.2434	1	2		64	-0.45672	2	2
NMMNH P-26205	4.94	8.65	2.23	6.5	3.5		47	-0.98616	1	2		65	-0.47895	2	2
NMMNH P-32752	4.43	8.92	2.4	4.5	3.5		48	-0.12989	1	2		66	-1.6982	2	2
NMMNH P-68395	3.65	4.15	2.1	6	3.5		49	-0.16825	1	2		67	-0.54826	2	2
NMMNH P-32814	3.33	5.2	1.56	9	5		50	-0.78406	1	2		68	-0.87712	2	2
TMP 1974.010.0001	4.2	8.5	2.3	6.5	4		51	-0.56507	2	2		69	-1.2486	2	2
TMP 1974.010.0001	4	7.9	2	7.1	4.4		52	-0.61063	2	2		70	-1.2362	2	2
TMP 1987.158.0078	2.7	4.2	1.1	?	6.5		53	1.0462	2	1		71	-1.2826	2	2
TMP 1987.019.0068	2	4.6	1	?	6		54	1.1416	2	1		72	-0.87092	2	2
TMP 1987.031.0054	2.4	4.8	1.1	?	5.5		55	0.87475	2	1		73	-1.1545	2	2
TMP 1987.004.0047	2.2	4.1	0.7	?	7		56	1.2915	2	1		74	-0.53655	2	2
TMP 1987.048.0077	4.6	6.7	1.7	?	5		57	-0.044528	2	2		75	-0.82586	2	2
TMP 1995.127.0025c	3.7	6.7	1.8	?	4.25		58	0.11498	2	1		76	-0.87712	2	2
TMP 1995.147.0026	1.9	2.8	0.7	?	6.5		59	1.333	2	1		77	-1.1237	2	2
TMP 1995.151.0010	2.4	3.9	0.9	?	6.5		60	1.1346	2	1		78	-0.75567	2	2
TMP 1995.181.0011	1.9	5	1	?	5		61	0.90508	2	1		79	-1.1268	2	2
TMP 1996.012.0366	4.2	6.3	1.5	?	4.5		62	-0.042363	2	2		80	-0.7258	2	2
TMP 1987.158.0080	3.9	9	1.9	?	4.25		63	-0.044042	2	2		81	-0.89963	2	2
TMP 1987.158.0081	4.3	11.2	2	?	5		64	-0.080925	2	2		82	-0.28031	2	2
TMP 1987.033.0055	4	9.9	2.1	?	4		65	-0.14924	2	2		83	-0.5933	2	2
TMP 1987.036.0392	5.5	13	2.2	?	4		66	-0.82537	2	2		84	-1.287	2	2
TMP 1987.051.0023	3.8	8.2	1.4	?	5		67	0.13043	2	1		85	-1.0277	2	2
TMP 1987.072.0023	4.9	9.6	2.2	?	4		68	-0.45098	2	2		86	-0.89534	2	2
TMP 1987.072.0026	5	13	2.3	?	4		69	-0.62224	2	2		87	-0.34503	2	2
TMP 1987.072.0004	5.4	13	2.5	?	4		70	-0.7343	2	2		88	-1.4673	2	2
TMP 1995.012.0109	5.9	13	2.8	?	3.75		71	-0.92927	2	2		89	-0.78784	2	2
TMP 1995.126.0029	5	12	2.1	?	5		72	-0.35789	2	2		90	0.37804	2	1
TMP 1995.127.0025a	5.3	11.8	2.3	?	4.25		73	-0.61567	2	2		91	-0.94453	2	2
TMP 1995.127.0025b	4.5	7.8	1.8	?	4.75		74	-0.10265	2	2		92	-2.9384	2	2
TMP 1995.127.0025d	4.2	7.5	1.7	?	4		75	-0.18787	2	2		93	-1.035	2	2
TMP 1995.129.0002	4.9	9.6	2.2	?	4		76	-0.45098	2	2		94	-0.15531	2	2
TMP 1995.131.0012	5.1	9.5	2.1	?	4		77	-0.53857	2	2		95	-1.865	2	2
TMP 1995.137.0002a	5	9.2	2.3	?	4		78	-0.45208	2	2		96	-1.1329	2	2
TMP 1995.137.0002b	4.9	10.5	2.1	?	4		79	-0.5093	2	2		97	-1.1855	2	2
TMP 1995.179.0003	4.7	10.4	2.2	?	4.25		80	-0.34886	2	2		98	-0.39551	2	2
TMP 1995.019.0004	4.2	8	1.5	?	4.5		81	-0.11849	2	2		99	-0.34719	2	2
TMP 1995.002.0018	4.2	10.5	2.5	?	3.75		82	-0.24199	2	2		100	-0.56122	2	2
TMP 1995.406.0005	4.7	10.3	2	?	5		83	-0.18871	2	2		101	0.16642	2	1
TMP 1996.012.0361	5.9	13	2.7	?	4		84	-0.88338	2	2		102	-1.5702	2	2
TMP 1996.012.0363	4.8	9.2	2	?	4		85	-0.43208	2	2		103	-0.37657	2	2
TMP 1996.012.0038	5.1	11.7	2.1	?	5		86	-0.38148	2	2		104	-1.3751	2	2
TMP 1987.036.0011	4.5	9.5	2.4	?	4		87	-0.26239	2	2		105	-0.75706	2	2
TMP 1987.043.0005	5.7	11.2	2.1	?	4.5		88	-0.70902	2	2		106	0.011691	2	1
TMP 1987.046.0053	4.8	9.4	2.2	?	4		89	-0.40501	2	2		107	0.43096	2	1
TMP 1996.012.0102	5.5	11.2	3.2	?	5		90	-0.309	2	2		108	-0.091708	2	2
TMP 1996.012.0104	5.6	10.8	2.6	?	4		91	-0.69181	2	2		109	-0.63183	2	2
TMP 1996.012.0112	7.9	16	2.8	?	3.75		92	-1.804	2	2		110	-0.79141	2	2
TMP 1996.012.0115	5.5	14	2.7	?	4.25		93	-0.71617	2	2		111	-2.1388	2	2
TMP 1996.012.0118	5.1	9	2.2	?	5.5		94	-0.11475	2	2		112	-1.6938	2	2
TMP 1996.012.0034	6.4	13	2.6	?	3.75		95	-1.1504	2	2		113	-0.15121	2	2
TMP 1996.012.0360	5	9	1.9	?	4.25		96	-0.45128	2	2		114	0.31919	2	1
TMP 1996.012.0364	5.3	9	2.1	?	4		97	-0.59022	2	2		115	-1.1189	2	2
TMP 1995.182.0021	3.5	7.6	1.7	?	4		98	0.066806	2	1		116	-0.81583	2	2
TMP 1995.184.0023	3.7	8.3	1.9	?	4		99	-0.0025531	2	2		117	-0.29288	2	2
TMP 1995.021.0005	4.7	9.2	2.4	?	3.75		100	-0.3869	2	2		118	-0.20898	2	2
TMP 1987.112.0010	3.8	8.7	1.6	?	6		101	0.39968	2	1		119	-0.22459	2	2
TMP 1987.112.0021	5.6	6.3	1.4	?	4.75		102	-0.51479	2	2		120	-1.0687	2	2
TMP 1987.112.0009	4.2	8.1	2	?	4.25		103	-0.09679	2	2		121	-2.0947	2	2
TMP 1987.112.0028	5.5	11.5	2.2	?	4.25		104	-0.6943	2	2		122	-1.3039	2	2
TMP 1987.050.0100	5.2	8.2	2.2	?	4.25		105	-0.43546	2	2		123	-1.4487	2	2
TMP 1987.036.0184	3.5	7.5	1.9	?	4.25		106	0.17122	2	1		124	-1.5303	2	2
TMP 1987.036.0418	4.1	9.5	2.6	?	4.5		107	0.049537	2	1		125	-0.15507	2	2
TMP 1987.036.0070	4.1	9.5	2.4	?	4		108	-0.1143	2	2		126	5.4011	2	1
TMP 1987.036.0093	5.3	11.8	2.5	?	4.75		109	-0.45184	2	2		127	-1.8798	2	2
TMP 1995.012.0031	5	10.5	2.4	?	4		110	-0.49228	2	2		128	-1.4694	2	2
TMP 1995.012.0033	6	13	2.3	?	3.5		111	-1.1203	2	2		129	-0.88926	2	2
TMP 1995.012.0038	5.7	11	2.2	?	3.75		112	-0.87376	2	2		130	-1.5516	2	2
TMP 1995.012.0040	3.5	7.8	2	?	3.75		113	0.047995	2	1		131	-1.1446	2	2
TMP 1995.012.0042	2.9	7	1.7	?	4.5		114	0.44361	2	1		132	-1.4513	2	2
TMP 1995.012.0043	5	12	2.3	?	4		115	-0.57746	2	2		133	-1.5314	2	2
TMP 1995.012.0074a	5.1	10.2	2.4	?	4		116	-0.51587	2	2		134	-0.99045	2	2
TMP 1995.012.0074b	3.8	6.3	1.6	?	4.5		117	0.12374	2	1		135	-1.6041	2	2
TMP 1995.012.0074c	4.9	9.4	2.2	?	5.25		118	-0.12252	2	2		136	-1.5615	2	2
TMP 1995.124.0004	3.3	6.2	1.5	?	4.25		119	0.23141	2	1		137	-0.46556	2	2
TMP 1987.036.0068	5.7	11.2	2.4	?	4.5		120	-0.65497	2	2		138	-0.0071522	2	2
TMP 1987.050.0038	6.3	14.2	2.4	?	4		121	-1.1393	2	2		139	-0.73819	2	2
p74105no1	4	9	?	7	4.2		122	-0.66669	2	2		140	-1.3307	2	2
p74105no2	4.1	8	?	7.2	4		123	-0.77494	2	2		141	-1.1904	2	2
p8016440	5.1	9	2.2	6.4	4.2		124	-0.8551	2	2		142	-0.074759	2	2
p848946	3.7	5	?	6	4		125	-0.10316	2	2		143	-0.47006	2	2
p8120259	2.1	3	?	0	6		126	3.0367	2	1		144	-0.90009	2	2
p8216249	4.3	7	?	8	4		127	-1.0638	2	2		145	-0.37466	2	2
p84989	5.1	9	?	6.4	4.6		128	-0.77701	2	2		146	-1.1198	2	2
p8220173	3.1	5	?	9	5		129	-0.5988	2	2		147	-1.4149	2	2
p80161515	5.9	10	?	5	4.2		130	-0.76596	2	2		148	-0.644	2	2
p808234	5.3	9	?	5	4		131	-0.55017	2	2		149	-2.1685	2	2
Irvine Saurornitholestes 1	5.15	9.55	?	6.12	4.54		132	-0.74464	2	2		150	-2.0037	2	2
Irvine Saurornitholestes 2	5.7	10.97	?	?	4.34		133	-0.74575	2	2		151	-1.1437	2	2
Irvine Saurornitholestes 3	5.1	7.54	?	5.98	4.72		134	-0.54468	2	2		152	-0.6732	2	2
TMP 2005.049.0096	4.69	8.01	2.28	6.86	3.58		135	-0.95229	2	2		153	-2.0452	2	2
TMP 2005.049.0119	5.98	11.66	2.48	5.84	4.58		136	-0.97074	2	2		154	-0.50912	2	2
TMP 2005.049.0120	5.77	11.25	2.49	?	5.54		137	-0.40108	2	2		155	0.11273	2	1
TMP 2005.049.0074	4.36	9.2	2.45	?	4.28		138	-0.11654	2	2		156	-0.0090309	2	2
TMP 2005.049.0023	4.89	8.74	2.45	5.5	3.82		139	-0.52579	2	2		157	-0.5161	2	2
TMP 2005.039.0007	4.26	7.19	1.98	7.02	4.32		140	-0.67319	2	2		158	-0.15851	2	2
TMP 2005.039.0001	5.26	10.78	2.37	5.18	3.78		141	-0.67493	2	2		159	-0.45834	2	2
TMP 2005.012.0028	3.93	5.66	1.81	?	4.38		142	0.11143	2	1		160	-1.2023	2	2
TMP 2005.009.0047	5.24	10.8	2.77	?	4.04		143	-0.51768	2	2		161	0.46947	2	1
TMP 2004.116.0026	5.74	11.6	2.67	?	4.28		144	-0.69529	2	2
TMP 2004.103.0017	3.67	4.42	1.61	?	3.68		145	0.048261	2	1
TMP 2004.012.0019	5.12	8.18	2.37	6.1	4.06		146	-0.73361	2	2
TMP 2003.012.0132	5.42	9.21	2.37	6.18	4.2		147	-0.88097	2	2
TMP 2002.060.0006	6.53	9.66	3.73	6.1	3.58		148	-1.1996	2	2
TMP 2001.012.0183	4.7	7.67	2.17	8.42	4.34		149	-1.2725	2	2
TMP 2001.012.0180	5.6	8.31	2.45	8.64	5.44		150	-1.3741	2	2
TMP 2002.060.0008	5.62	10.04	2.37	?	4.04		151	-0.6964	2	2
TMP 2001.012.0019	4.33	9.2		4.78	3.54		152	-0.24621	2	2
TMP 2000.012.0111	5.77	11.03	2.41	6.88	4.5		153	-1.2353	2	2
TMP 2000.057.0006	5.79	11.54	3.16	?	3.82		154	-0.74041	2	2
TMP 2000.012.0116	4.66	10.1	2.57	?	4.8		155	-0.11338	2	2
TMP 2000.012.0114	4.75	7.58	2.38	4.88	4.3		156	-0.11077	2	2
TMP 2005.012.??	7.5	12.85	3.68	?	4.9		157	-1.0624	2	2
TMP 2004.012.0018	7.07	8.38	3.13	?	5.36		158	-0.68456	2	2
TMP 2003.012.0189	5.34	10.1	2.82	?	3.88		159	-0.55525	2	2
TMP 1983.036.0236	3.82	7.52	1.75	8.34	6.1		160	-0.53982	2	2
TMP 1995.012.0026	1.69	2.2	0.83	6.12	5.42		161	0.86773	2	1

## Sheet: DFA F-K Drom
DROMAEOSAURIDAE: FRUITLAND-KIRTLAND NEW MEXICO SPECIMENS VS. DINOSAUR PARK FM. SPECIMENS
"Saurornitholestinae" = Dromaeosauridae Morphotype A							DFA Results with all teeth: 69.03% correctly identified, p(same)=0.00241						DFA Results when only teeth with 3/5 or more measurements included: 81.16% correctly identified, p(same)=0.00001688
							0	Score	Group	Classif.			0	Score	Group	Classif.
	FABL	CH	BW	ADM	PDM		4	-0.071956	1	2			5	2.8891	1	1
NMMNH P-27486	?	?	?	?	5		5	2.4593	1	1			6	-2.3128	1	2
NMMNH P-27487	2.67	?	1.28	0	4		6	-1.5184	1	2			7	3.2003	1	1
NMMNH P-27559	5.46	8.57	2.45	8	5		7	1.8942	1	1			8	2.802	1	1
NMMNH P-30001	3.95	7.1	2.07	0	4		8	2.1494	1	1			9	3.2975	1	1
NMMNH P-30002	3.42	?	1.6	0	4		9	2.2779	1	1			10	3.9159	1	1
NMMNH P-30003	2.88	3.83	1.41	0	4		10	2.4801	1	1			11	0.98727	1	1
NMMNH P-30330	3.03	3.64	1.18	0	6		11	0.20408	1	1			12	3.4465	1	1
NMMNH P-38027	4.48	?	2.21	?	7		12	2.7296	1	1			15	-1.0738	1	2
NMMNH P-38425	2.5	?	1.04	0	5.5		13	-0.071956	1	2			16	-1.3795	1	2
NMMNH P-38431	?	?	?	?	5		14	-0.43833	1	2			17	1.2537	1	1
NMMNH P-38432	?	?	?	6	4.6		15	-0.796	1	2			20	0.74139	1	1
NMMNH P-49808	5.8	?	2.5	5.5	4.5		16	-0.71854	1	2			21	-0.2233	1	2
NMMNH P-66896	4.27	9.07	2.25	7	4.5		17	-0.042082	1	2			23	-1.3409	1	2
NMMNH P-07189	?	8.29	3.11	5	5		18	-0.11489	1	2			28	-0.48049	1	2
NMMNH P-30220	?	?	0.54	?	?		19	-0.26955	1	2			29	-0.3177	1	2
NMMNH P-30222	?	?	?	?	3.5		20	0.23533	1	1			30	2.9607	1	1
NMMNH P-30223	4.08	?	2.2	?	6		21	0.069757	1	1			31	-1.1654	1	2
NMMNH P-30225	4.01	?	2.01	?	?		22	-0.029785	1	2			32	0.10041	1	1
NMMNH P-30226	?	?	?	4.5	3.5		23	0.045966	1	1			34	0.27464	1	1
NMMNH P-30227	2.58	?	1.21	7	5		24	0.22096	1	1			36	3.1222	1	1
NMMNH P-30228	3.65	?	1.69	?	?		25	0.37884	1	1			37	3.7112	1	1
NMMNH P-30229	3.27	?	1.47	?	?		26	1.9599	1	1			41	0.78789	1	1
NMMNH P-30230	?	?	?	0	6		27	-0.20368	1	2			43	-1.3926	1	2
NMMNH P-30231	?	?	?	?	4		28	-0.21448	1	2			45	-2.0107	1	2
NMMNH P-30232	4.67	?	2.3	5	4		29	-0.049861	1	2			46	-0.1045	1	2
NMMNH P-32831	4.3	?	?	?	4.5		30	1.8598	1	1			47	-0.61767	1	2
NMMNH P-33144	4.28	?	1.97	0	4.5		31	0.08824	1	1			48	-1.1389	2	2
NMMNH P-33145	3.05	?	1.46	6	4		32	0.2298	1	1			49	-1.5596	2	2
NMMNH P-33146	4.11	?	1.74	?	6		33	-0.88633	1	2			50	0.81721	2	1
NMMNH P-33149	?	?	?	7	4		34	0.41787	1	1			51	0.88165	2	1
NMMNH P-33473	3.22	6.51	1.66	?	5		35	-0.38564	1	2			52	0.47031	2	1
NMMNH P-33474	?	?	?	6	5		36	1.7981	1	1			53	0.88563	2	1
NMMNH P-33475	4.59	?	2.06	0	5		37	2.5488	1	1			54	-0.63995	2	2
NMMNH P-33476	2.52	3.21	1.12	0	5		38	-0.12681	1	2			55	-0.26456	2	2
NMMNH P-33477	?	?	1.36	?	?		39	0.17501	1	1			56	0.93685	2	1
NMMNH P-33484	3.76	?	1.77	?	?		40	-0.88633	1	2			57	0.77765	2	1
NMMNH P-33485	?	?	?	7	4		41	-0.20635	1	2			58	0.41158	2	1
NMMNH P-33486	5.05	6.66	2.61	?	6		42	-1.1894	1	2			59	-0.85729	2	2
NMMNH P-33487	?	?	?	8	4.5		43	-0.63937	1	2			60	-0.4419	2	2
NMMNH P-22578	4.38	8.37	1.88	7	5.5		44	-0.1484	1	2			61	-0.36823	2	2
NMMNH P-26201	?	?	?	5	4		45	-0.94613	1	2			62	-0.43666	2	2
NMMNH P-26205	4.94	8.65	2.23	6.5	3.5		46	0.0020054	1	1			63	-1.5733	2	2
NMMNH P-32752	4.43	8.92	2.4	4.5	3.5		47	-0.31919	1	2			64	-0.60472	2	2
NMMNH P-68395	3.65	4.15	2.1	6	3.5		48	-0.58287	2	2			65	-0.90143	2	2
TMP 1974.010.0001	4.2	8.5	2.3	6.5	4		49	-0.67705	2	2			66	-1.0928	2	2
TMP 1974.010.0001	4	7.9	2	7.1	4.4		50	0.79187	2	1			67	-1.0997	2	2
TMP 1987.158.0078	2.7	4.2	1.1	?	6.5		51	1.0199	2	1			68	-1.1681	2	2
TMP 1987.019.0068	2	4.6	1	?	6		52	0.79354	2	1			69	-0.77788	2	2
TMP 1987.031.0054	2.4	4.8	1.1	?	5.5		53	1.0652	2	1			70	-1.0822	2	2
TMP 1987.004.0047	2.2	4.1	0.7	?	7		54	-0.14091	2	2			71	-0.64638	2	2
TMP 1987.048.0077	4.6	6.7	1.7	?	5		55	0.12521	2	1			72	-0.93283	2	2
TMP 1995.127.0025c	3.7	6.7	1.8	?	4.25		56	1.097	2	1			73	-0.90143	2	2
TMP 1995.147.0026	1.9	2.8	0.7	?	6.5		57	0.91127	2	1			74	-1.167	2	2
TMP 1995.151.0010	2.4	3.9	0.9	?	6.5		58	0.93643	2	1			75	-0.80549	2	2
TMP 1995.181.0011	1.9	5	1	?	5		59	-0.048553	2	2			76	-1.1043	2	2
TMP 1996.012.0366	4.2	6.3	1.5	?	4.5		60	0.085563	2	1			77	-0.69638	2	2
TMP 1987.158.0080	3.9	9	1.9	?	4.25		61	0.061414	2	1			78	-0.98582	2	2
TMP 1987.158.0081	4.3	11.2	2	?	5		62	0.025928	2	1			79	-0.20821	2	2
TMP 1987.033.0055	4	9.9	2.1	?	4		63	-0.52789	2	2			80	-0.57676	2	2
TMP 1987.036.0392	5.5	13	2.2	?	4		64	0.2173	2	1			81	-1.1757	2	2
TMP 1987.051.0023	3.8	8.2	1.4	?	5		65	-0.34753	2	2			82	-1.0717	2	2
TMP 1987.072.0023	4.9	9.6	2.2	?	4		66	-0.3258	2	2			83	-0.82434	2	2
TMP 1987.072.0026	5	13	2.3	?	4		67	-0.49154	2	2			84	-0.34763	2	2
TMP 1987.072.0004	5.4	13	2.5	?	4		68	-0.73237	2	2			85	-1.4559	2	2
TMP 1995.012.0109	5.9	13	2.8	?	3.75		69	-0.20996	2	2			86	-0.81716	2	2
TMP 1995.126.0029	5	12	2.1	?	5		70	-0.43755	2	2			87	0.42006	2	1
TMP 1995.127.0025a	5.3	11.8	2.3	?	4.25		71	-0.11392	2	2			88	-0.93681	2	2
TMP 1995.127.0025b	4.5	7.8	1.8	?	4.75		72	-0.094774	2	2			89	-2.7778	2	2
TMP 1995.127.0025d	4.2	7.5	1.7	?	4		73	-0.34753	2	2			90	-0.84752	2	2
TMP 1995.129.0002	4.9	9.6	2.2	?	4		74	-0.42938	2	2			91	-0.2309	2	2
TMP 1995.131.0012	5.1	9.5	2.1	?	4		75	-0.39721	2	2			92	-1.7835	2	2
TMP 1995.137.0002a	5	9.2	2.3	?	4		76	-0.32917	2	2			93	-1.2025	2	2
TMP 1995.137.0002b	4.9	10.5	2.1	?	4		77	-0.21815	2	2			94	-1.2675	2	2
TMP 1995.179.0003	4.7	10.4	2.2	?	4.25		78	-0.016607	2	2			95	-0.4564	2	2
TMP 1995.019.0004	4.2	8	1.5	?	4.5		79	-0.082958	2	2			96	-0.37793	2	2
TMP 1995.002.0018	4.2	10.5	2.5	?	3.75		80	-0.11833	2	2			97	-0.59047	2	2
TMP 1995.406.0005	4.7	10.3	2	?	5		81	-0.69799	2	2			98	0.13612	2	1
TMP 1996.012.0361	5.9	13	2.7	?	4		82	-0.31144	2	2			99	-1.8329	2	2
TMP 1996.012.0363	4.8	9.2	2	?	4		83	-0.25631	2	2			100	-0.44645	2	2
TMP 1996.012.0038	5.1	11.7	2.1	?	5		84	-0.18949	2	2			101	-1.3327	2	2
TMP 1987.036.0011	4.5	9.5	2.4	?	4		85	-0.57581	2	2			102	-0.87577	2	2
TMP 1987.043.0005	5.7	11.2	2.1	?	4.5		86	-0.31058	2	2			103	-0.051925	2	2
TMP 1987.046.0053	4.8	9.4	2.2	?	4		87	-0.44452	2	2			104	0.4531	2	1
TMP 1996.012.0102	5.5	11.2	3.2	?	5		88	-0.61575	2	2			105	-0.071056	2	2
TMP 1996.012.0104	5.6	10.8	2.6	?	4		89	-1.4902	2	2			106	-0.55809	2	2
TMP 1996.012.0112	7.9	16	2.8	?	3.75		90	-0.48343	2	2			107	-0.76894	2	2
TMP 1996.012.0115	5.5	14	2.7	?	4.25		91	-0.24263	2	2			108	-2.0387	2	2
TMP 1996.012.0118	5.1	9	2.2	?	5.5		92	-0.93301	2	2			109	-1.6877	2	2
TMP 1996.012.0034	6.4	13	2.6	?	3.75		93	-0.36222	2	2			110	-0.19426	2	2
TMP 1996.012.0360	5	9	1.9	?	4.25		94	-0.52019	2	2			111	0.25831	2	1
TMP 1996.012.0364	5.3	9	2.1	?	4		95	0.19206	2	1			112	-1.0172	2	2
TMP 1995.182.0021	3.5	7.6	1.7	?	4		96	0.12089	2	1			113	-0.8154	2	2
TMP 1995.184.0023	3.7	8.3	1.9	?	4		97	-0.30947	2	2			114	-0.44589	2	2
TMP 1995.021.0005	4.7	9.2	2.4	?	3.75		98	0.35552	2	1			115	-0.2501	2	2
TMP 1987.112.0010	3.8	8.7	1.6	?	6		99	-0.58408	2	2			116	-0.35469	2	2
TMP 1987.112.0021	5.6	6.3	1.4	?	4.75		100	-0.054927	2	2			117	-1.0514	2	2
TMP 1987.112.0009	4.2	8.1	2	?	4.25		101	-0.52315	2	2			118	-1.9475	2	2
TMP 1987.112.0028	5.5	11.5	2.2	?	4.25		102	-0.46303	2	2			119	-1.5512	2	2
TMP 1987.050.0100	5.2	8.2	2.2	?	4.25		103	0.22021	2	1			120	-1.781	2	2
TMP 1987.036.0184	3.5	7.5	1.9	?	4.25		104	0.0363	2	1			121	-1.7648	2	2
TMP 1987.036.0418	4.1	9.5	2.6	?	4.5		105	-0.026657	2	2			122	-0.47072	2	2
TMP 1987.036.0070	4.1	9.5	2.4	?	4		106	-0.37459	2	2			123	5.8391	2	1
TMP 1987.036.0093	5.3	11.8	2.5	?	4.75		107	-0.37424	2	2			124	-2.3816	2	2
TMP 1995.012.0031	5	10.5	2.4	?	4		108	-0.79875	2	2			125	-1.7047	2	2
TMP 1995.012.0033	6	13	2.3	?	3.5		109	-0.67982	2	2			126	-1.5641	2	2
TMP 1995.012.0038	5.7	11	2.2	?	3.75		110	0.15853	2	1			127	-1.5957	2	2
TMP 1995.012.0040	3.5	7.8	2	?	3.75		111	0.4909	2	1			128	-1.207	2	2
TMP 1995.012.0042	2.9	7	1.7	?	4.5		112	-0.3446	2	2			129	-1.6231	2	2
TMP 1995.012.0043	5	12	2.3	?	4		113	-0.42058	2	2			130	-1.5286	2	2
TMP 1995.012.0074a	5.1	10.2	2.4	?	4		114	0.11283	2	1			131	-1.2508	2	2
TMP 1995.012.0074b	3.8	6.3	1.6	?	4.5		115	-0.18663	2	2			132	-1.9234	2	2
TMP 1995.012.0074c	4.9	9.4	2.2	?	5.25		116	0.28301	2	1			133	-1.6268	2	2
TMP 1995.124.0004	3.3	6.2	1.5	?	4.25		117	-0.58017	2	2			134	-0.45288	2	2
TMP 1987.036.0068	5.7	11.2	2.4	?	4.5		118	-0.83391	2	2			135	-0.018219	2	2
TMP 1987.050.0038	6.3	14.2	2.4	?	4		119	-0.64678	2	2			136	-0.85106	2	2
p74105no1	4	9	?	7	4.2		120	-0.80642	2	2			137	-1.6996	2	2
p74105no2	4.1	8	?	7.2	4		121	-0.87515	2	2			138	-1.1742	2	2
p8016440	5.1	9	2.2	6.4	4.2		122	-0.25721	2	2			139	-0.26532	2	2
p848946	3.7	5	?	6	4		123	2.8338	2	1			140	-0.43832	2	2
p8120259	2.1	3	?	0	6		124	-1.2018	2	2			141	-0.8572	2	2
p8216249	4.3	7	?	8	4		125	-0.8205	2	2			142	-0.61774	2	2
p84989	5.1	9	?	6.4	4.6		126	-0.98812	2	2			143	-1.3569	2	2
p8220173	3.1	5	?	9	5		127	-0.66351	2	2			144	-1.6247	2	2
p80161515	5.9	10	?	5	4.2		128	-0.4644	2	2			145	-0.85427	2	2
p808234	5.3	9	?	5	4		129	-0.73511	2	2			146	-2.7151	2	2
Irvine Saurornitholestes 1	5.15	9.55	?	6.12	4.54		130	-0.60071	2	2			147	-2.5963	2	2
Irvine Saurornitholestes 2	5.7	10.97	?	?	4.34		131	-0.67716	2	2			148	-1.1829	2	2
Irvine Saurornitholestes 3	5.1	7.54	?	5.98	4.72		132	-0.97941	2	2			149	-0.63764	2	2
TMP 2005.049.0096	4.69	8.01	2.28	6.86	3.58		133	-0.93079	2	2			150	-2.2684	2	2
TMP 2005.049.0119	5.98	11.66	2.48	5.84	4.58		134	-0.47204	2	2			151	-0.46067	2	2
TMP 2005.049.0120	5.77	11.25	2.49	?	5.54		135	-0.10198	2	2			152	0.13278	2	1
TMP 2005.049.0074	4.36	9.2	2.45	?	4.28		136	-0.51617	2	2			153	-0.099754	2	2
TMP 2005.049.0023	4.89	8.74	2.45	5.5	3.82		137	-0.77697	2	2			154	-0.49123	2	2
TMP 2005.039.0007	4.26	7.19	1.98	7.02	4.32		138	-0.51449	2	2			155	-0.36343	2	2
TMP 2005.039.0001	5.26	10.78	2.37	5.18	3.78		139	0.029019	2	1			156	-0.46856	2	2
TMP 2005.012.0028	3.93	5.66	1.81	?	4.38		140	-0.46641	2	2			157	-1.712	2	2
TMP 2005.009.0047	5.24	10.8	2.77	?	4.04		141	-0.62185	2	2			158	0.069084	2	1
TMP 2004.116.0026	5.74	11.6	2.67	?	4.28		142	0.022256	2	1
TMP 2004.103.0017	3.67	4.42	1.61	?	3.68		143	-0.80892	2	2
TMP 2004.012.0019	5.12	8.18	2.37	6.1	4.06		144	-0.92277	2	2
TMP 2003.012.0132	5.42	9.21	2.37	6.18	4.2		145	-1.4381	2	2
TMP 2002.060.0006	6.53	9.66	3.73	6.1	3.58		146	-1.4637	2	2
TMP 2001.012.0183	4.7	7.67	2.17	8.42	4.34		147	-1.7584	2	2
TMP 2001.012.0180	5.6	8.31	2.45	8.64	5.44		148	-0.62957	2	2
TMP 2002.060.0008	5.62	10.04	2.37	?	4.04		149	-0.045201	2	2
TMP 2001.012.0019	4.33	9.2		4.78	3.54		150	-1.2504	2	2
TMP 2000.012.0111	5.77	11.03	2.41	6.88	4.5		151	-0.71104	2	2
TMP 2000.057.0006	5.79	11.54	3.16	?	3.82		152	-0.14044	2	2
TMP 2000.012.0116	4.66	10.1	2.57	?	4.8		153	-0.18797	2	2
TMP 2000.012.0114	4.75	7.58	2.38	4.88	4.3		154	-1.2478	2	2
TMP 2005.012.??	7.5	12.85	3.68	?	4.9		155	-1.0882	2	2
TMP 2004.012.0018	7.07	8.38	3.13	?	5.36		156	-0.54207	2	2
TMP 2003.012.0189	5.34	10.1	2.82	?	3.88		157	-0.84086	2	2
TMP 1983.036.0236	3.82	7.52	1.75	8.34	6.1		158	0.66914	2	1
TMP 1995.012.0026	1.69	2.2	0.83	6.12	5.42

## Sheet: DFA DP Troodontids
TROODONTIDAE: NEW MEXICO SPECIMENS VS. DINOSAUR PARK FM. SPECIMENS
Troodontidae							DFA Results with all teeth included: 76.6% correctly identified, p(same)=0.8718					DFA Results when only teeth with 3/5 or more measurements included: 83.72% correctly identified, p(same)=0.01362
	FABL	CH	BW	ADM	PDM		0	Score	Group	Classif.		0	Score	Group	Classif.
NMMNH P-68396	5.5	4.78	2.85	3.5	1.75		3	3.5481	1	1		3	3.6191	1	1
NMMNH P-22566	5.34	6.83	2.61	0	2		4	0.90115	1	1		4	3.3185	1	1
NMMNH P-32746	?	?	?	2.5	?		5	-0.64588	1	2		6	1.5	1	1
NMMNH P-32772	6.04	8.38	3.27	?	2		6	1.5653	1	1		9	1.7808	1	1
NMMNH P-32784	?	?	?	3	3		7	-1.1922	1	2		11	-4.9427	2	2
NMMNH P-33520	?	?	3.06	?	2		8	2.485	1	1		12	-1.2699	2	2
NMMNH P-33521	3.26	3.91	1.85	0	2.5		9	0.43638	1	1		13	-5.2264	2	2
NMMNH P-33901	?	?	?	?	1.5		10	-0.21182	1	2		14	-1.7745	2	2
p849114	5.2	9	?	1.5	1.5		11	-2.6364	2	2		15	-5.8993	2	2
p798498	5	7	?	1.42	1.62		12	-0.76788	2	2		16	-4.4555	2	2
p841832	5.2	9	?	1.5	1.66		13	-2.727	2	2		17	-3.464	2	2
p80161370	5.7	8	?	1.42	1.36		14	-1.4294	2	2		18	3.0401	2	1
p8219370	4.8	9	?	1.54	1.66		15	-2.8347	2	2		19	-2.7097	2	2
p80161950	5.1	8	?	1.88	1.94		16	-1.9614	2	2		20	-4.0065	2	2
p8561	4.3	8	?	1.08	1.42		17	-1.7901	2	2		21	-3.6569	2	2
p7412	6.2	9	3.4	0.94	1.56		18	1.7606	2	1		22	-3.9694	2	2
p8116501	5.9	8	?	1.86	1.66		19	-1.5936	2	2		23	-1.8689	2	2
p841685	5.6	8	?	2.14	1.88		20	-1.8252	2	2		24	0.54366	2	1
TMP 2000.012.0117	4.51	6.67	2.22	2.4	2.24		21	-0.84225	2	2		25	-4.3212	2	2
TMP 1996.012.0072	4.96	8.61	2.55	2	1.78		22	-1.2436	2	2		26	-1.7106	2	2
TMP 1995.012.0011	5.35	8.01	2.65	?	2.16		23	-0.40474	2	2		27	-1.0163	2	2
TMP 1995.021.0010	4.99	6.92	2.81	1.84	2		24	1.1961	2	1		28	-3.1328	2	2
TMP 1989.089.0004	2.97	3.89	1.53	?	3.38		25	-1.3675	2	2		29	1.2632	2	1
TMP 1987.050.0034	3.26	4.55	1.79	?	2.06		26	-0.33093	2	2		30	-1.7358	2	2
TMP 1986.216.0004	4.88	6.56	2.32	?	2.1		27	-0.15718	2	2		31	-2.763	2	2
TMP 1987.036.0139	5.91	8.36	2.72	2.64	2.26		28	-0.5224	2	2		32	-2.4283	2	2
TMP 1989.050.0129	4.01	4.16	1.99	?	1.98		29	0.96134	2	1		33	-5.1576	2	2
TMP 1986.177.0008	3.45	3.37	1.55	?	2.98		30	-0.43519	2	2		34	-4.7932	2	2
TMP 1985.066.0073	3.31	4.57	1.69	?	2.42		31	-0.87522	2	2		35	-0.55139	2	2
TMP 1989.116.0063	3.39	4.48	1.83	2.34	2.16		32	-0.21274	2	2		36	-5.1068	2	2
TMP 1984.089.0275	5.21	8.76	2.44	2.28	1.96		33	-1.8254	2	2		37	1.318	2	1
TMP 1986.023.0091	2.86	3.56	1.25	?	3.22		34	-1.9122	2	2		38	-3.6274	2	2
TMP 1986.008.0093	3.62	3.33	1.73	?	2.96		35	0.25986	2	1		39	0.9216	2	1
TMP 1986.130.0016	5.02	7.44	2.42	3.04	2.54		36	-1.0426	2	2		40	-4.9195	2	2
TMP 1983.036.0214	4.29	6.5	2.73	1.4	1.64		37	1.414	2	1		41	-2.0536	2	2
TMP 1985.056.0182	5.85	10.38	3.33	2.42	1.92		38	-0.28812	2	2		42	0.16169	2	1
TMP 1985.056.0179	5.83	7.72	2.93	?	2.04		39	1.0081	2	1		43	-1.0205	2	2
TMP 1986.054.0066	1.53	2.33	1.1	2.76	2.2		40	-1.066	2	2		44	-0.8199	2	2
TMP 1994.016.0015	3.62	5.4		1.74	2.42		41	-0.027776	2	2		45	0.57903	2	1
TMP 1987.036.0301	4.18	5.24	1.94	1.42	1.62		42	0.0081716	2	1		46	-2.863	2	2
TMP 1987.077.0135	3.58	3.46	1.69	?	2.94		43	-0.0012104	2	2		47	-6.8849	2	2
TMP 1995.127.0027	5.2	7.6	2.8	2	2		44	0.52721	2	1		48	-4.9326	2	2
TMP 1990.034.0001	4.7	6	2	0	2.4		45	-0.70327	2	2		49	-4.3745	2	2
TMP 1986.202.0005	2.5	3.1	1.3	0	4		46	-1.6422	2	2
TMP 2000.019.0001	2.8	5.5	1.2	?	2		47	-3.3235	2	2
TMP 2000.021.0001	3.1	5.2	1.2	?	1.5		48	-2.6656	2	2
TMP 1979.008.0635	2.4	3.3	0.9	?	2		49	-2.2494	2	2

## Sheet: DFA HC Troodontids
TROODONTIDAE: NEW MEXICO SPECIMENS VS. HORSESHOE CANYON FORMATION SPECIMENS
Troodontidae							DFA Results with all teeth included: 65.91% correctly identified, p(same)=0.371						DFA Results of only those teeth with 3/5 measurements: 75% correctly identified, p(same)=0.456
	FABL	CH	BW	ADM	PDM		0	Score	Group	Classif.
NMMNH P-68396	5.5	4.78	2.85	3.5	1.75		NMMNH	1.5482	1	1			0	Score	Group	Classif.
NMMNH P-22566	5.34	6.83	2.61	0	2		NMMNH	-0.36045	1	2			NMMNH	0.56681	1	1
NMMNH P-32746	?	?	?	2.5	?		NMMNH	0.18433	1	1			NMMNH	0.81622	1	1
NMMNH P-32772	6.04	8.38	3.27	?	2		NMMNH	0.078454	1	1			NMMNH	-0.19131	1	2
NMMNH P-32784	?	?	?	3	3		NMMNH	2.6135	1	1			NMMNH	1.7877	1	1
NMMNH P-33520	?	?	3.06	?	2		NMMNH	0.093004	1	1			TMP	0.21231	2	1
NMMNH P-33521	3.26	3.91	1.85	0	2.5		NMMNH	0.49606	1	1			TMP	-0.30613	2	2
NMMNH P-33901	?	?	?	?	1.5		NMMNH	-0.90219	1	2			TMP	-2.0624	2	2
TMP 1997.044.0004	5.67	7.4	3.31	1.62	2.1		TMP	0.62935	2	1			TMP	-1.6286	2	2
TMP 1994.009.0004	5.68	7.36	2.76	1.06	1.72		TMP	-0.46754	2	2			TMP	-0.070989	2	2
TMP 1987.012.0014	5.25	7.83	2.79	0.94	1.28		TMP	-1.7417	2	2			TMP	-0.87985	2	2
TMP 1988.096.0007	6.29	8.92	3.12	1	1.34		TMP	-1.4258	2	2			TMP	-1.3416	2	2
TMP 1998.068.0156a	6.39	8.48	3.2	1.2	1.9		TMP	-0.033503	2	2			TMP	-0.47573	2	2
TMP 1998.068.0156b	5.81	7.64	2.96	0.75	1.4		TMP	-1.1802	2	2			TMP	0.34569	2	1
TMP 1998.068.0156c	5.56	8.05	3.24	0.85	1.5		TMP	-1.152	2	2			TMP	0.37761	2	1
TMP 1997.007.0003	5.48	6.97	3.16	1.6	1.7		TMP	-0.10209	2	2			TMP	0.22014	2	1
TMP 1997.077.0004	5.56	7.04	3.4	1.3	2		TMP	0.43451	2	1			TMP	-0.4271	2	2
TMP 1994.009.0004	5.48	6.14	2.8	0.8	1.6		TMP	-0.38689	2	2			TMP	-0.25196	2	2
TMP 1990.082.0024	5.98	7.76	3.28	1.3	2		TMP	0.31085	2	1			TMP	-1.1868	2	2
TMP 1990.082.0025	3.4	4.9	1.58	2.7	2.4		TMP	0.95768	2	1			TMP	-1.0169	2	2
TMP 1990.082.0026	5.48	7.3	3.12	1.4	1.9		TMP	0.049136	2	1			TMP	-0.32484	2	2
TMP 1988.096.0002	6.31	8.4	3.28	0.7	1.25		TMP	-1.4415	2	2			TMP	-0.23109	2	2
TMP 1985.031.0019	5.31	6.64	2.76	1.1	1.3		TMP	-1.1357	2	2			TMP	-0.048991	2	2
TMP 1983.045.0005	5.73	7.52	3.24	0.95	1.7		TMP	-0.43419	2	2			TMP	-1.1199	2	2
TMP 1983.045.0006	5.89	7.39	3.48	1	1.6		TMP	-0.3934	2	2			TMP	1.6908	2	1
TMP 1974.001.0002	6.23	8.4	3.44	0.95	1.9		TMP	-0.10195	2	2			TMP	-1.3955	2	2
TMP 1974.001.0001	4.57	6.31	2.48	3	2		TMP	0.618	2	1			TMP	-3.4409	2	2
TMP 1985.012.0002	3.5	4.1	1.7	0	2.4		TMP	0.30029	2	1			TMP	-3.7619	2	2
TMP 1985.030.0032	3.07	5.4	1.42	0	1.7		TMP	-1.8558	2	2			TMP	0.38909	2	1
TMP 1998.063.0043	6.13	10.68	3.57	1.6	1.4		TMP	-1.725	2	2			TMP	0.16172	2	1
TMP 1999.050.0115	5.78	10.68	3.68	1	1.3		TMP	-2.2902	2	2			TMP	0.5757	2	1
TMP 1999.050.0114	5.56	6.81	2.82	1.5	2		TMP	0.42009	2	1			TMP	-2.7365	2	2
TMP 2000.045.0090	3.49	5.23	1.99	?	2.4		TMP	0.43839	2	1			TMP	-2.8975	2	2
TMP 2000.045.0024	3.57	4.4	2.24	?	2.2		TMP	0.51901	2	1			TMP	-0.090651	2	2
TMP 2000.045.0091	5.43	9.98	3.4	0.9	1.7		TMP	-1.5531	2	2			TMP	-0.37809	2	2
TMP 2001.045.0080	7	12.08	4.07	1.1	1.6		TMP	-1.5225	2	2			TMP	-0.78266	2	2
TMP 2001.045.0081	4.81	6.64	2.82	1.8	2.2		TMP	0.61423	2	1			TMP	-1.5552	2	2
TMP 2002.045.0048	5.56	7.72	?	1.5	2		TMP	0.076683	2	1			TMP	1.373	2	1
TMP 2003.045.0058	4.98	7.06	2.66	1.6	1.9		TMP	-0.1705	2	2			TMP	-0.31522	2	2
TMP 2009.122.0001	6.31	9.44	3.68	1.2	1.6		TMP	-0.87595	2	2			TMP	-2.7327	2	2
TMP 1995.002.0023	5.48	6.23	2.48	1.5	2.3		TMP	1.0736	2	1			TMP	-0.70129	2	2
TMP 1993.012.0013	5.48	6.97	3.32	1.3	1.7		TMP	-0.16944	2	2
TMP 1989.125.0014	2.4	4.48	2	1.15	1.3		TMP	-1.9255	2	2
TMP 1987.012.0019	6.06	7.36	3.28	0.7	1.2		TMP	-1.2364	2	2

## Sheet: DFA Richardo
RICHARDOESTESIA: NEW MEXICO SPECIMENS VS. DINOSAUR PARK FM. SPECIMENS
Richardoestesia							DFA Results: 56.34% correctly identified, p(same)=0.4132						DFA Results of only those teeth with 3/5 measurements.
	FABL	CH	BW	ADM	PDM		0	Score	Group	Classif.			63.79% correctly classified, p(same)=0.3017
NMMNH P-27489	?	?	?	?	8		3	-0.033264	1	2			0	Score	Group	Classif.
NMMNH P-28379	?	?	?	0	8		4	0.35823	1	1			7	0.1344	1	1
NMMNH P-30277	?	?	?	?	?		5	-0.033726	1	2			9	1.3245	1	1
NMMNH P-36552	?	?	?	0			7	-0.41524	1	2			10	0.52082	1	1
NMMNH P-38410	1.45	?	0.7	0	12.5		8	0.36812	1	1			11	1.328	1	1
NMMNH P-38428	?	?		0	9		9	1.0925	1	1			12	1.072	1	1
NMMNH P-52501	?	?	1.62	0	7		10	0.041105	1	1			13	1.1591	1	1
NMMNH P-52503	0.99	1.47	0.19	0	12		11	0.68334	1	1			14	0.5928	1	1
NMMNH P-52514	0.87	?	?	0	11		12	1.1016	1	1			15	1.0972	1	1
NMMNH P-27495	3.9*	?	1.71	0	7		13	1.1331	1	1			17	1.0164	1	1
NMMNH P-30004	3.34	4.13	1.42	0	8		14	0.45253	1	1			18	1.058	1	1
NMMNH P-30005	3.36	?	1.33	0	7		15	1.0301	1	1			20	-0.070636	1	2
NMMNH P-30331	3.36	?	1.62	0	9		16	0.34834	1	1			21	0.083319	1	1
NMMNH P-27488	?	?	?	0	7		17	1.0087	1	1			22	-1.279	1	2
NMMNH P-27496	3.69	?	1.64	0	8		18	0.88861	1	1			24	-2.2087	1	2
NMMNH P-30208	2.87	5	1.4	0	9		19	-0.033726	1	2			30	-0.86168	1	2
NMMNH P-33478	?	?	?	?	?		20	-0.24521	1	2			32	-0.329	1	2
NMMNH P-33479	1.89	?	1.05	?	?		21	-0.37785	1	2			33	0.83585	1	1
NMMNH P-30209	2.24	?	0.81	0	7		22	-0.747	1	2			34	-0.6121	1	2
NMMNH P-30219	?	?	?	9.5	6		23	-0.033726	1	2			35	-0.67189	2	2
NMMNH P-30221	?	?	?	?	?		24	-1.0979	1	2			36	-0.48602	2	2
NMMNH P-33482	2.94	4.51	1.19	15	7		25	-1.1172	1	2			37	0.16847	2	1
NMMNH P-30207	?	?	?	13	9		26	0.35823	1	1			38	-0.88095	2	2
NMMNH P-30224	?	?	?	0	8		27	0.34834	1	1			39	-0.45024	2	2
NMMNH P-33480	?	?	?	0	7		28	-1.0129	1	2			40	-0.56541	2	2
NMMNH P-33481	?	?	?	12	8		29	0.34834	1	1			41	-0.20382	2	2
NMMNH P-33483	?	?	?	0	7		30	-0.2306	1	2			42	0.22176	2	1
NMMNH P-32753	3.24	?	1.5	9	7		31	0.28699	1	1			43	-0.82353	2	2
NMMNH P-22567	2.82	?	1.4	?	?		32	-0.41929	2	2			44	0.13558	2	1
NMMNH P-37793	2.28	?	0.99	?	8		33	0.48577	2	1			45	0.217	2	1
NMMNH P-32742	2.01	?	1.21	0	13		34	-0.39185	2	2			46	-0.16039	2	2
NMMNH P-46389	2.82	?	1.21	6	6		35	-0.49579	2	2			47	-0.051207	2	2
TMP 1983.036.0233	4.7	12.3	2.3	?	5.26		36	-0.35309	2	2			48	-0.5852	2	2
TMP 1983.036.0242	3.7	8.3	1.6	?	7		37	0.4091	2	1			49	0.55819	2	1
TMP 1984.092.0268	3.5	5.5	1.5	?	7		38	-0.76736	2	2			50	-0.26235	2	2
TMP 1986.023.0090	4	10	1.7	?	7		39	-0.39564	2	2			51	-0.61147	2	2
TMP 1988.091.0028	2.9	5.3	1	?	7		40	-0.53982	2	2			52	-0.18938	2	2
TMP 1989.076.0063	2.8	5.2	0.9	?	7		41	-0.33689	2	2			53	0.24431	2	1
TMP 1990.106.0006	1.7	4	0.7	?	9.5		42	0.11953	2	1			54	0.057942	2	1
TMP 1995.157.0029	1.4	2.8	0.7	?	11		43	-0.25798	2	2			55	-0.63042	2	2
TMP 1982.024.0078	3.41	4.92	1.3	7.66	6.62		44	0.25614	2	1			56	0.080496	2	1
TMP 1984.084.0247	3.14	6.13	1.5	?	7.04		45	0.20414	2	1			57	-0.81561	2	2
TMP 1986.023.0105	2.21	4.8	1.16	?	9.26		46	-0.27057	2	2			58	-0.10704	2	2
TMP 1987.099.0048	2	5.35	0.99	?	9.46		47	0.064128	2	1			59	0.0089227	2	1
TMP 1987.114.0005	2.83	4.43	1.08	?	7.82		48	0.047766	2	1			60	0.27994	2	1
TMP 1989.076.0083	2.87	3.35	1.21	8.78	7.3		49	0.54709	2	1			61	0.194	2	1
TMP 1986.171.0009	2.11	3.75	1.16	?	7.36		50	-0.15998	2	2			62	-0.049705	2	2
TMP 1989.036.0355	3.8	10	2	?	7		51	-0.41375	2	2			63	0.13977	2	1
TMP 1984.001.0012	4.5	11	2.1	?	6		52	-0.26251	2	2			64	0.10146	2	1
TMP 1986.023.0105	2.3	5.8	1.1	?	8.5		53	0.19197	2	1			65	-0.28295	2	2
TMP 1986.033.0054	2.1	4.5	1.1	?	8		54	0.043701	2	1			66	-0.59713	2	2
TMP 1986.045.0046	2.3	5.5	1.2	?	10		55	-0.55683	2	2			67	-0.2393	2	2
TMP 1988.036.0199	3.7	9.5	1.7	?	7		56	0.11615	2	1			68	-0.77222	2	2
TMP 1995.181.0010	3	7.2	1.6	?	7		57	-0.91656	2	2			69	-1.2018	2	2
TMP 1996.142.0019	3.1	9.7	1.5	?	7		58	-0.014696	2	2			70	0.7536	2	1
TMP 1987.158.0076	2.4	3.3	0.8	?	10		59	0.07144	2	1			71	-0.76461	2	2
TMP 1984.092.0205	2	2.7	0.7	?	12		60	0.31841	2	1			72	-0.81225	2	2
TMP 1986.021.0068	2	3.7	1	?	12		61	0.2338	2	1			73	-2.4306	2	2
TMP 1995.174.0052	1.8	2.3	0.7	?	12		62	0.035416	2	1			74	0.68124	2	1
TMP 1995.181.0010c	2.2	3.3	0.8	?	12		63	0.069098	2	1
TMP 1995.181.0060e	1.4	2.4	0.6	?	12		64	0.15262	2	1
TMP 1995.181.0060f	1.9	2.5	0.7	?	12		65	-0.17366	2	2
BB86 uncat.	3	6	?	?	9		66	-0.30155	2	2
p741067no1	2.3	5	?	8	4.8		67	-0.21817	2	2
p741067no2	3	6	?	?	4.5		68	-0.34685	2	2
p741067no3	3.3	5	?	7	4		69	-0.82022	2	2
p83331	4.8	7	?	?	4.6		70	0.85605	2	1
p8219366	3.1	6	1.8	?	4.4		71	-0.61451	2	2
p83368no3	3.6	7	?	?	7		72	-0.67451	2	2
p663182	3.8	7	?	?	4		73	-1.9832	2	2
nmckno23b	5.9	10	?	?	4		74	0.59856	2	1
hjohnson4	2	4	?	?	5

## Sheet: Troodontid Sensitivity
SENSITIVITY ANALYSIS: TROODONTID-SPECIFIC PCA AND DFA BASED ON THE MEASUREMENT DATASET
Troodontidae							PCA WITH ALL TEETH (EVEN THOSE WITH LOTS OF MISSING DATA)																	PCA WITH ONLY THOSE TEETH WITH 3/5 OR MORE MEASUREMENTS										PC1 loadings	PC2	PC3	PC4	PC5		DFA Results with All Teeth Included						DFA Results with only teeth with 3/5 or more of measurements included (NOTE: not very satisfactory because only three NM teeth can be included)
							Axis	Eigenvalue	%Variance		Axis 1	Axis 2	Axis 3	Axis 4	Axis 5		PC1 loadings	PC2	PC3	PC4	PC5			Axis	Eigenvalue	%Variance		Axis 1	Axis 2	Axis 3	Axis 4	Axis 5	1	-0.516	-0.1681	0.3036	0.2766	-0.7327		Percent correctly identified: 94.23%, p(same)<0.0000001						Percent correctly identified: 100%, P(same)<0.0000001
	FABL	CH	BW	ADM	PDM		1	2.98435	59.687	NMMNHP-22566	-6.148	1.1994	1.6365	0.25625	-0.14961	1	-0.5219	-0.1519	0.3663	0.1877	-0.7315			1	3.20258	64.052	NMMNHP-22566	-6.4696	1.4491	1.5755	-0.11508	-0.12448	2	-0.4956	-0.342	-0.09898	-0.7872	0.0893		0	Score	Group	Classif.			0	Score	Group	Classif.
NMMNHP-22566	5.34	6.83	2.61	0	2		2	0.937189	18.744	NMMNHP-32746	-0.427	1.4453	0.57784	0.14266	0.33056	2	-0.5038	-0.3297	-0.01067	0.5622	0.5668			2	0.891731	17.835	NMMNHP-32772	-7.4321	-2.5979	0.73852	0.52984	0.055582	3	-0.5202	-0.1807	0.2113	0.4551	0.6671		4	15.36	1	1			4	63.307	1	1
NMMNHP-32746	?	?	?	2.5	?		3	0.636259	12.725	NMMNHP-32772	-7.2645	-2.4752	1.0264	-0.020924	-0.34695	3	-0.5026	-0.1737	0.1186	-0.8008	0.2486			3	0.64811	12.962	NMMNHP-33521	-2.5292	3.0021	1.1149	0.3523	0.66052	4	0.2806	-0.8577	-0.3566	0.234	-0.06025		5	-0.14788	1	2			6	54.009	1	1
NMMNHP-32772	6.04	8.38	3.27	?	2		4	0.313175	6.2635	NMMNHP-32784	-0.43596	1.2366	0.27679	0.11543	0.22255	4	0.2582	-0.874	-0.3494	-0.08627	-0.1999			4	0.164633	3.2927	UCMP187076	1.3123	0.24272	0.55721	0.24769	0.32098	5	0.3727	-0.2939	0.8522	-0.2049	0.08083		6	11.329	1	1			9	32.933	1	1
NMMNHP-32784	?	?	?	3	3		5	0.12903	2.5806	NMMNHP-33520	-2.4101	-0.27179	-0.73304	-2.9824	0.64366	5	0.393	-0.2724	0.8541	0.002469	0.2045			5	0.0929466	1.8589	UCMP187075	0.1491	-0.26814	0.37811	-0.60714	-0.084464								7	-0.98074	1	2			11	-44.028	2	2
NMMNHP-33520	?	?	3.06	?	2					NMMNHP-33521	-2.1679	2.6985	0.88112	-0.7088	0.17461												UCMP187073	-0.12605	-0.20451	0.27759	-0.2216	-0.17937								8	14.17	1	1			12	-50.487	2	2
NMMNHP-33521	3.26	3.91	1.85	0	2.5					NMMNHP-33901	-0.76608	0.53101	-1.665	-0.0048136	-0.39864	Two Group Permutation Test: 2000 replicates, Mahalanobis distance=0.5139, p<0.0005											UCMP187074	0.28207	-0.29848	0.70313	-0.34472	0.062612	Two Group Permutation Test: 2000 replicates, Mahalanobis distance=1.476, p<0.0005							9	10.944	1	1			13	-45.022	2	2
NMMNHP-33901	?	?	?	?	1.5					UCMP187076	1.4227	0.24844	0.4859	-0.42598	0.086039												UCMP187067	0.36478	0.042512	0.19287	-0.030643	-0.16677								10	-4.4658	1	2			14	-42.719	2	2
UCMP187076	2.2	3	1	?	4					UCMP187075	0.19573	-0.26561	0.48909	0.53178	0.3297												UCMP187068	1.1989	-0.055014	1.2164	0.20681	-0.028976								11	-5.6634	2	2			15	-48.699	2	2
UCMP187075	2.7	4.5	1	?	3.75					UCMP187073	-0.068347	-0.20103	0.37487	0.31771	-0.0017424												UCMP187069	0.44426	-0.22622	0.66539	-0.37223	-0.094205								12	-7.0148	2	2			16	-41.468	2	2
UCMP187073	2.9	4.3	1.1	?	3.5					UCMP187074	0.35715	-0.28153	0.76093	0.21011	0.27142												UCMP187066	0.070978	0.24142	-0.15352	0.42583	-0.54367								13	-5.9026	2	2			17	-47.697	2	2
UCMP187074	2.7	4.2	1.1	?	4					UCMP187067	0.42713	0.037929	0.25104	0.14695	-0.11635												UCMP187063	0.86721	-0.052084	0.51079	-0.44086	0.04495								14	-5.8394	2	2			18	-49.155	2	2
UCMP187067	2.7	3.8	1	?	3.5					UCMP187068	1.2982	-0.027844	1.1869	-0.26141	-0.16319												UCMP187065	0.50672	0.28187	-0.6296	-0.3997	0.521								15	-6.4119	2	2			19	-52.804	2	2
UCMP187068	2.6	3.1	1	?	4.5					UCMP187069	0.50534	-0.21511	0.7386	0.31299	0.16712												UCMP187059	1.96	-0.062848	1.4033	-0.38127	0.23719								16	-6.0279	2	2			20	-53.469	2	2
UCMP187069	2.7	4.1	1	?	4					UCMP187066	0.12309	0.22527	-0.078018	0.062117	-0.71634												UCMP214059	0.55599	0.40887	-0.46566	0.38217	1.0092								17	-6.7533	2	2			21	-51.331	2	2
UCMP187066	3	3.5	1	?	3					UCMP187063	0.92855	-0.050809	0.55882	0.27978	0.32401												UCMP186886	-0.3041	0.034611	-0.11581	0.1336	-0.70473								18	-6.2059	2	2			22	-34.555	2	2
UCMP187063	2.4	3.9	0.9	?	4					UCMP187065	0.58076	0.25118	-0.61258	0.12066	0.67072												IMG1675	-0.010461	0.087602	-0.076972	0.19276	-0.09155								19	-7.4533	2	2			23	-50.873	2	2
UCMP187065	2	4.1	1	?	3					UCMP187059	2.0492	-0.038551	1.3656	-0.024959	0.43921												AMNH5731#2	-0.59481	0.39165	-1.48	-0.092996	0.052184								20	-6.2264	2	2			24	-43.466	2	2
UCMP187059	2.1	3.2	0.8	?	5					UCMP214059	0.70327	0.3957	-0.58801	-0.7638	0.53585												AMNH5731#1	-0.053347	0.60839	-1.4518	0.038834	-0.16622								21	-7.9716	2	2			25	-53.902	2	2
UCMP214059	1.9	3.4	1.3	?	3					UCMP186886	-0.27337	0.020532	0.022437	0.39063	-0.65071												AMNH5731#3	-0.27398	0.5047	-1.4975	-0.093458	0.038583								22	-2.6538	2	2			26	-61.226	2	2
UCMP186886	3.2	4	1	?	3					IMG1675	0.019673	0.064681	-0.020183	-0.086706	-0.18469												AMNH5728.1	-0.51045	0.29121	-0.38818	-0.77034	0.30711								23	-6.689	2	2			27	-57.849	2	2
IMG1675	2.78	3.83	?	?	3.14					AMNH5731#2	-0.54973	0.33828	-1.3801	0.29747	0.094986												AMNH5728.2	-0.59378	-0.32783	-0.081412	-0.64196	-0.11028								24	-4.6922	2	2			28	-44.973	2	2
AMNH5731#2	2.52	4.43	1.09	?	1.92					AMNH5731#1	-0.020225	0.54704	-1.3611	0.28568	-0.16191												AMNH5728.3	-0.41924	-0.6554	-0.23821	-0.43566	-0.22072								25	-5.599	2	2			29	-48.182	2	2
AMNH5731#1	2.44	3.93	0.91	?	2.02					AMNH5731#3	-0.23239	0.44637	-1.4088	0.28919	0.085976												AMNH5719.1	0.1528	0.17552	-0.25684	-0.0089829	-0.3018								26	-6.9776	2	2			30	-53.506	2	2
AMNH5731#3	2.39	4.22	1	?	1.98					AMNH5728.1	-0.34867	-0.057405	-0.41806	0.50338	0.66683												AMNH5719.2	0.99714	0.2278	0.35146	0.12056	-0.21054								27	-6.2812	2	2			31	-53.097	2	2
AMNH5728.1	2.47	4.9	1.12	5.06	2.9					AMNH5728.2	-0.55544	-0.33387	0.072666	0.66123	0.32989												AMNH5719.3	0.803	0.4003	-0.080558	0.26698	-0.44504								28	-5.6556	2	2			32	-52.652	2	2
AMNH5728.2	2.89	4.99	1.12	?	3.2					AMNH5728.3	-0.29737	-0.99036	-0.21126	0.55705	0.034279												AMNH5502.1	-0.69389	-0.5535	0.017825	-1.1302	0.15227								29	-6.1784	2	2			33	-56.969	2	2
AMNH5728.3	2.93	4.85	1.1	6.48	3.18					AMNH5719.1	0.19861	0.15482	-0.1698	0.26353	-0.23726												AMNH5502.2	-0.28221	-0.37909	-0.0006917	-0.56034	0.23767								30	-8.5646	2	2			34	-48.267	2	2
AMNH5719.1	2.74	3.88	0.96	?	3.06					AMNH5719.2	1.0627	0.22156	0.3721	0.0048793	-0.24857												AMNH5502.3	1.1714	-3.4074	-0.80787	0.53216	0.1946								31	-6.7969	2	2			35	-44.917	2	2
AMNH5719.2	2.53	3.25	0.87	?	3.74					AMNH5719.3	0.8512	0.37786	-0.032268	0.079305	-0.53039												AMNH5733.1	-0.14563	0.53174	-1.5477	-0.2293	0.021071								32	-7.244	2	2			36	-77.658	2	2
AMNH5719.3	2.64	3.19	0.82	?	3.28					AMNH5502.1	-0.65734	-0.55412	0.19087	0.88116	0.85968												AMNH5706.1	1.904	0.52879	0.37796	0.15661	-0.28886								33	-7.6455	2	2			37	-61.847	2	2
AMNH5502.1	2.74	5.55	1.15	?	3.4					AMNH5502.2	-0.12209	-0.70667	-0.037577	0.35158	0.47607												AMNH5706.2	1.7692	0.42699	0.51558	0.12379	-0.40939								34	-6.2953	2	2			38	-63.107	2	2
AMNH5502.2	2.63	4.8	1.18	5.94	3.38					AMNH5502.3	1.2663	-3.7215	-0.86811	-0.31533	-0.25878												AMNH5706.3	1.6944	0.49116	0.41625	0.32043	-0.3195								35	-6.6939	2	2			39	-62.393	2	2
AMNH5502.3	2.52	4.3	1.22	11.58	3.82					AMNH5733.1	-0.1135	0.46872	-1.4482	0.39997	0.16293												AMNH5489.1	-2.1665	-0.15714	-1.5253	-0.28706	0.059009								36	-15.81	2	2			40	-58.724	2	2
AMNH5733.1	2.31	4.26	0.93	?	2					AMNH5706.1	1.9603	0.51113	0.36708	-0.032446	-0.33026												AMNH5489.2	-0.86438	0.22756	-1.0825	0.16074	-0.2346								37	-6.9755	2	2			41	-39.467	2	2
AMNH5706.1	2.21	2.62	0.62	?	3.96					AMNH5706.2	1.8195	0.41441	0.52603	0.052974	-0.40397												AMNH5489.3	-0.71151	0.43008	-1.6592	-0.10626	-0.029313								38	-9.1323	2	2			42	-47.699	2	2
AMNH5706.2	2.36	2.73	0.63	?	4.04					AMNH5706.3	1.7584	0.4783	0.40107	-0.1319	-0.46396												AMNH5725.1	-0.0011444	0.23623	-0.36792	0.29524	-0.044029								39	-9.204	2	2			43	-56.009	2	2
AMNH5706.3	2.35	2.6	0.7	?	3.9					AMNH5489.1	-2.1205	-0.19333	-1.3425	0.53367	0.22251												AMNH5725.2	0.87274	0.20815	0.44159	0.40583	0.064412								40	-8.373	2	2			44	-44.701	2	2
AMNH5489.1	3.12	5.63	1.46	?	1.56					AMNH5489.2	-0.81696	0.19051	-0.96735	0.23886	-0.30039												AMNH5725.3	0.33655	0.61643	-0.81603	0.67148	0.22976								41	-3.0643	2	2			45	-42.354	2	2
AMNH5489.2	2.93	4.35	1.17	?	2.1					AMNH5489.3	-0.67574	0.37017	-1.541	0.37775	0.039426												AMNH5722.1	0.61771	0.21014	0.25476	0.45555	0.14709								42	-4.965	2	2			46	-44.249	2	2
AMNH5489.3	2.56	4.5	1.07	?	1.74					AMNH5725.1	0.075246	0.21884	-0.33381	-0.090724	-0.23696												AMNH5722.2	1.5298	-2.3154	0.46947	0.16042	0.30751								43	-5.8325	2	2			47	-39.672	2	2
AMNH5725.1	2.69	3.72	1.12	?	2.88					AMNH5725.2	0.97329	0.21262	0.40517	-0.3668	-0.22231												AMNH5722.3	1.3535	-1.254	0.58619	0.20931	0.38723								44	-5.0227	2	2			48	-62.348	2	2
AMNH5725.2	2.51	3.1	1.05	?	3.74					AMNH5725.3	0.39294	0.56855	-0.84882	-0.57253	-0.24738												IMG1672	0.41857	0.3085	0.0311	0.66277	-0.052066								45	-5.3306	2	2			49	-51.282	2	2
AMNH5725.3	2.35	3.16	?	?	2.52					AMNH5722.1	0.67945	0.19684	0.22701	-0.48804	-0.16914												UCMP186904	1.5836	0.58248	-0.16827	-0.01242	0.031067								46	-3.8409	2	2			50	-40.315	2	2
AMNH5722.1	2.53	3.22	?	?	3.52					AMNH5722.2	1.6292	-2.6237	0.36111	-0.37125	0.092159												UCMP128845	-0.26088	-0.54307	0.87624	-0.4483	-0.41115								47	-4.1803	2	2			51	-62.824	2	2
AMNH5722.2	2.4	3.9	?	9.38	4.66					AMNH5722.3	1.4885	-1.5698	0.43357	-0.49316	0.11683												UCMP128787	-1.8975	-0.35969	-0.17452	0.67341	-0.068619								48	-12.252	2	2			52	-43.475	2	2
AMNH5722.3	2.33	3.56	?	7.8	4.42					IMG1672	0.47274	0.28787	0.018173	-0.50045	-0.46377												UCMP186868	1.4745	0.31498	0.51946	0.22018	0.16417								49	-9.1397	2	2			53	-17.133	2	2
IMG1672	2.69	3.12	?	?	3.22					UCMP186904	1.6446	0.55141	-0.18056	-0.0082797	0.032653												UCMP186885	1.9498	0.21405	0.87446	-0.21472	0.024541								50	-4.1106	2	2			54	-49.006	2	2
UCMP186904	2	3	0.7	?	3.5					UCMP128845	-0.21596	-0.51978	1.0209	0.56496	-0.0348																									51	-8.4451	2	2			55	-58.143	2	2
UCMP128845	3.2	4.6	1.1	?	4					UCMP128787	-1.7884	-0.34329	-0.099572	-0.27754	-0.51542																									52	-6.3792	2	2
UCMP128787	3.6	4.6	1.7	?	2.5					UCMP186868	1.5709	0.31485	0.46357	-0.3231	-0.018265																									53	-0.28791	2	2
UCMP186868	2.2	2.9	0.9	?	4					UCMP186885	2.0208	0.21653	0.85364	0.021628	0.1621																									54	-6.5773	2	2
UCMP186885	2.1	3	0.7	?	4.5																																			55	-8.7013	2	2
